# Supplementary material for: Gene Expression Profiles of Chicken Embryo Fibroblasts in Response to Salmonella Enteritidis Infection
Source: PLoS One. 2015 Jun 5;10(6):e0127708. doi: 10.1371/journal.pone.0127708 (PMC4457728; doi:10.1371/journal.pone.0127708)
Supplement: S1 Table — Up- and down-regulated transcripts are listed in descending order of their expression fold change. (XLSX) [file pone.0127708.s001.xlsx]

## Sheet: microarray data
S1 Table. Selected data from the microarray analysis of CEFs, with a focus on transcripts representing Gallus gallus only. Up- and down-regulated transcripts are listed in descending order of their expression fold change.
Microarray ID	Description	ProbeName	Sequence	SE147/NI			SE11/NI
				Regulation	Fold change	P value	Regulation	Fold change	P value
LOC396216	Chicken mRNA for myelomonocytic growth factor (cMGF). [X14477]	A_87_P008955	TGCAGCTGGGTCAGCCCCACAGCAGCGCGCGCTGGTTTTTATATAAGTCACAACGATGGA	up	18.2586	2.3365e-05	up	12.9888	5.32526e-05
IL8	Chicken embryo fibroblast protein mRNA, complete cds. [M16199]	A_87_P009398	CTGCTCCTGATTTCTACTGGGAGAAACATCCGAAGAAGGCATCATGAAGCATTCCATCTT	up	16.8409	4.07236e-05	up	10.4935	0.00027998
IL1B	Gallus gallus mRNA for interleukin-1beta. [Y15006]	A_87_P008722	TTCGACATCTTCGACATCAACCAGAAGTGCTTCGTGCTGGAGTCACCCACCCAGCTGGTG	up	13.6241	0.000188272	up	16.9639	0.00023578
K60	Gallus gallus mRNA for K60 protein. [Y14971]	A_87_P008723	TTTGGAGCCATCATTTTCAAGGTATTACTTACTGTGAATTATTGCTGTGAAGCTACAAAC	up	11.6961	2.3365e-05	up	7.64549	0.000393871
CCL3	Gallus gallus finished cDNA, clone ChEST838h20. [CR389044]	A_87_P015066	CAAATAGGAAGATTATTTAACAGATATATATTTTTAAATTAAGAGTCATGCTTGGATTAT	up	9.95263	3.27651e-05	up	6.09248	0.000115318
CCL20	Gallus gallus MIP-3alpha mRNA for maacrophage inflammatory protein 3alpha, complete cds. [AB101005]	A_87_P038098	TCTGTTTATTTTGTTACTGCTTGGCACTATCTTGTGCCAAAATTTTCCTTTTAACTGGAG	up	7.89078	8.83068e-05	up	3.75174	0.00128578
RCJMB04_3k20	Gallus gallus mRNA for hypothetical protein, clone 3k20. [AJ851469]	A_87_P035754	TTGGGAGCAGGGTAACCTACAGAACACACAAAAGGCGCTCTGTTGAGAGATATGAGAAAA	up	7.40108	0.402522	up	5.46654	0.51943
LOC422654	Gallus gallus finished cDNA, clone ChEST921e18. [CR386350]	A_87_P016541	GTGCCGTGTATTTTATGTGCACTTACTGTGTAGAAACATCAGCACACAACAGAATAATTG	up	6.91044	0.000275642	up	6.07749	0.000924226
IL23R	Gallus gallus finished cDNA, clone ChEST226c16. [CR386407]	A_87_P016496	TAATTTTACCTCATGTTTTTACAAACACAAAAATGTGAGCTTAGATTCCTGTAGGAGCCG	up	6.28643	0.000107961	up	2.64841	0.00314655
AM067584	AM067584 Chicken immune 3 - CSEQRBN33 Gallus gallus cDNA clone C0000474N03_T7, mRNA sequence [AM067584]	A_87_P035369	TGAGCAAAGAGCTCGAAAAGAAATACCTTGAGAGTGAAGAGGCAACCATCAAAAATGTGC	up	6.01749	0.0226761	up	1.80235	0.331877
TC186509	Q08514 (Q08514) Gallus gallus POL-like (Fragment), partial (19%) [TC186509]	A_87_P008302	AAGTTGCTCAATTCTGAATCCAGACATGTAGGCCTATGCGCCAAGGCTTGTAAAGCAAAA	up	5.94538	9.4657e-05	up	4.38858	0.000381191
ENO2	Gallus gallus mRNA for gamma-subunit of enolase, complete cds. [AB004291]	A_87_P038222	ACTGTGGGGCAATATATTAAAACACAGTCGTTAAAAACACACATGCTCTCATTTGCTTAT	up	5.42227	2.3365e-05	up	7.43803	0.000110376
CYGB	Gallus gallus mRNA for cytoglobin (CYGB gene). [AJ812227]	A_87_P035834	CGTCTACTTTAAGAAGCTCACCGGTGTCATGCTGGAGGTGATCGCCGAGGCGTATGGCAA	up	5.40496	0.00202491	up	2.75249	0.0338303
CN230868	WLB016C06.ab1 WLtestis Gallus gallus cDNA 5', mRNA sequence [CN230868]	A_87_P020602	CTGCATTTCCTATCTAGTTGCCTGGATTTTCAGCTCATCCTTTCTGGAAGTCAGTGCTCA	up	5.1446	0.0632709	up	2.91577	0.222113
TC206770	Q08514 (Q08514) Gallus gallus POL-like (Fragment), partial (25%) [TC206770]	A_87_P004254	CCAGTCAAGAAGTAAAGAAAAATCAAGGGAATGATTTTATTCTTCTGCTGACACAGATAG	up	4.95194	0.00896924	up	3.89286	0.025838
BX930068	Gallus gallus finished cDNA, clone ChEST591i18. [BX930068]	A_87_P024456	CAACATCTTGAAGAGGAAAACTCTCAGAGCAGACTTGGTGACGGGAACTTATCAGCAGAA	up	4.84494	0.0877343	up	2.51505	0.280874
AI980237	pat.pk0019.b2 chicken activated T cell cDNA Gallus gallus cDNA clone pat.pk0019.b2 5', mRNA sequence [AI980237]	A_87_P037559	AAATTGGGGAACGGTGAGCGAAAATTAAAGCTTTTGCCCCAAATGGAGCGTTCTGACCCC	up	4.83845	0.000891404	up	2.75582	0.00598267
K123	Gallus gallus mRNA for K123 protein. [Y14970]	A_87_P008724	TTATCCATTGCCTCCTCAGGAAAGTTCCTGGGCAAGATTGGCTCAGATAATCCATGGATT	up	4.36378	0.000968096	up	4.19839	5.32526e-05
NFKBIZ	Gallus gallus mRNA for hypothetical protein, clone 35i9. [AJ721113]	A_87_P035933	TTGTAGGCAGGTTAAGTGGGAAAATCTAACATGCTGAGGCCGAGCTGTGATGTGTTTCTT	up	4.34327	3.98079e-05	up	3.83814	0.000393871
IRF7	Gallus gallus interferon regulatory factor 3 (cIRF-3) mRNA, complete cds. [U20338]	A_87_P009128	CAGATTTACTTTTCTGAAGTTTTGTAAGTTTAAATATGTTTATATAAAGGTGCTTCTCAC	up	4.32606	2.3365e-05	up	2.67846	0.000924226
CR387544	Gallus gallus finished cDNA, clone ChEST248l19. [CR387544]	A_87_P015747	ATGCGTGAGGCAAACTACATTGGTGCTGACAAGTATTTCCATGCTCGTGGCAATTACGAT	up	4.05082	0.00118471	up	2.88895	0.000924226
BX929797	Gallus gallus finished cDNA, clone ChEST791h13. [BX929797]	A_87_P024584	CCTTGGTTAGAGTCAAGCACTTGGATTTTAACATTCAACTGCAGAATAAACTCTGCAGCA	up	3.90689	0.517494	up	4.25437	0.531511
RCJMB04_24b18	Gallus gallus mRNA for hypothetical protein, clone 24b18. [AJ851742]	A_87_P035574	AGCACAATGCAAATTCTACTACAAACTAAAGAGAACAAGGTGTAGTGGTAGGTGGGTTGA	up	3.72707	0.00551412	up	4.95652	0.00598267
IL6	Gallus gallus mRNA for chicken interleukin-6 precursor (IL-6 gene). [AJ309540]	A_87_P037453	ACTTATTTATTACGTAGTCAACGCCAAAGAAAATGTCCAGCAGCCAGACTGTTGTATAAC	up	3.70276	2.3365e-05	up	3.57146	6.94244e-05
ST6GALNAC2	G.gallus Gal beta 1, 3 GalNAc-specific GalNAc alpha 2, 6-sialyltransferase mRNA. [X77775]	A_87_P008829	ACAGACCTCACTTCTTGGAACTTCCTGGAGTTGCAGCCTCGAAGTCACGCTGGGTAGGCT	up	3.69196	9.4657e-05	up	1.81611	0.00182271
IL12B	Gallus gallus mRNA for interleukin-12 beta chain precursor (IL12B gene). [AJ564201]	A_87_P037236	AGAACCTTAGGAAAAGAATAAAATCCTAATTCTGAACTGCTTACAGTGTAAGTGCCCAGG	up	3.67785	0.00348384	up	2.83016	0.00718898
IRF1	Gallus gallus domesticus (clone cIRF1) interferon regulatory factor 1 (IRF1) mRNA, complete cds. [L39766]	A_87_P009463	TGGGCAAGGACACACAAAAGAAGGATGGAGGAGGTTCTAGTCCATGCATAATGCATAGAA	up	3.67021	2.12856e-05	up	3.83897	5.32526e-05
BX930900	Gallus gallus finished cDNA, clone ChEST379b15. [BX930900]	A_87_P024152	TGGTAAGGCTTTTAGAAATAATAGATTTCAGGGTCGTTGGTGGAGATGACAACATGTTTC	up	3.67015	0.00420945	up	3.34025	0.0115982
LOC395310	Gallus gallus prominin-like protein mRNA, partial cds. [AF406812]	A_87_P037638	ACTCTCCGATGCTGTGATTTTGGGTGTAAAACAATAAATGAGGTGATTGTGTGTTGCTGG	up	3.6686	0.00990121	up	1.81522	0.164741
LOC395325	Gallus gallus clone A1 putative apoptosis associated protein mRNA, partial cds. [U93865]	A_87_P008993	ATTTGATTGTCTTTTCTATTTGCAGGTAAAGAACCAAATATTTGGGCTGCAAAGGTGTGT	up	3.6518	0.0019617	up	1.91244	0.0459915
FZD2	Gallus gallus frizzled-2 (FZ2) mRNA, complete cds. [AY283065]	A_87_P035212	TTTTTTGTAATTAAACCTGTAAATAGCACTTGTAAATTTAATTATATATTTCTATTTAAA	up	3.61857	0.00135226	up	2.2693	0.00953642
EGFL5	Gallus gallus finished cDNA, clone ChEST211d22. [CR391731]	A_87_P013258	GCAATCATTGAGCATCTTCATGAGGATTATGAATGCATCAAGAAAGAAAATGAAAGGTTG	up	3.49401	0.0357788	up	2.01085	0.221587
VIL1	Chicken villin mRNA, complete cds. [J03781]	A_87_P009543	TGGCATGACCCGCTCTGCCTTTGCCAACTTGCCCTTGTGGAAACAGCAGAACCTCAAGAA	up	3.46695	0.307548	up	2.57463	0.477492
M74544	Chicken pp40 mRNA, complete cds. [M74544]	A_87_P009303	TGGAAACTGTGTGTTTCACACCATGTGTGTCATAATTGCTACACTTTTTAGCAACTGTAT	up	3.20621	0.000131297	up	4.19345	0.000110376
CR353358	Gallus gallus finished cDNA, clone ChEST280e20. [CR353358]	A_87_P017989	TGAAAGCCTCCATCGGAAAGATCTCACACATCTTCCAAAGTGAACTCTTTCAGGCTCTGC	up	3.16667	0.0016489	up	1.90562	0.018412
BX950524	Gallus gallus finished cDNA, clone ChEST416b6. [BX950524]	A_87_P021598	CTCTCCCCAACGTGTTTGCAGGATCGACACCGTGAAGAGAACAATGCCACCGGAGCAGTA	up	3.14748	0.215029	up	1.47391	0.347948
LOC419860	Gallus gallus finished cDNA, clone ChEST362o18. [BX932176]	A_87_P023608	GTGCAAGATGCACGGCGTGGTTTCTTATTTTTACTACAGATGCGTTTTACAACGTTTTGC	up	3.13115	9.4657e-05	up	3.52134	0.00131933
RCJMB04_9c8	Gallus gallus mRNA for hypothetical protein, clone 9c8. [AJ719993]	A_87_P036714	AATGTAACTCCTTACAATCCCTCGCATTACCAACAGAGGCAATAAAGCTCCAATGAAATT	up	3.11486	0.61468	up	3.18818	0.642971
THRAP2	Gallus gallus finished cDNA, clone ChEST309a3. [BX950692]	A_87_P021511	GATTTTGTGGATCCAGTCCAAAGAGTCAGTTGTTCTTGTTCCAGGCACAAGGTTTTCAAA	up	3.09932	0.465417	up	3.01328	0.521959
LOC422220	Gallus gallus finished cDNA, clone ChEST498p13. [CR352849]	A_87_P018325	TGTTTACTATGTGGGTGCAGTGCGTTTCGTTTGCTTTGTACCACAATTGAAACCTTGGTA	up	3.08966	0.0117174	up	3.04099	0.021193
ATP11A	Gallus gallus finished cDNA, clone ChEST875n2. [CR388768]	A_87_P015251	TCTTCATCACCTGATGAAGTTGCTTTAGTTGAAGGAATACAGAGGCTTGGTTACACCTAT	up	3.06575	0.0191711	up	1.96719	0.145436
CR407168	Gallus gallus finished cDNA, clone ChEST752g20. [CR407168]	A_87_P012254	CACCTTCCAGCACCCGCAGCGAAGCTAGCTTGAAACTGTTTGGTCACTCGGCATGTGGTA	up	3.05935	2.3365e-05	up	1.36375	0.00346156
BX931768	Gallus gallus finished cDNA, clone ChEST798g2. [BX931768]	A_87_P023794	GAGAAGACACTTAGACCAAGAACAGCAGAAGTCTACACAATTGCCATCAACAAGCAAGGC	up	3.01789	0.00699989	up	2.17469	0.0345772
DN929793	4155482 BARC_3GAL chicken mixed tissue Gallus gallus cDNA clone 3GAL_55H15 5', mRNA sequence [DN929793]	A_87_P009715	TGTTGTGAGCTGGGAAAAACGCTCACAGCTCCGGGAAGCGATGAGCAAGATGATGCAGGC	up	3.01242	0.0120519	up	2.78676	0.0147013
RGS17	Gallus gallus RGS protein RGS-17 mRNA, complete cds. [AF151968]	A_87_P037854	CTATGGTCTCTGTCTACATTTTTACCAAGGTCCTCCTTGCTTGAAATAGCATGGGAGGGA	up	3.00322	0.00593272	up	2.24004	0.0385453
BX935301	Gallus gallus finished cDNA, clone ChEST959g23. [BX935301]	A_87_P022186	AAGATCGTACTACAGAAGGTCCTATTCAAGAAGCAGGTCACGTTCAAGAGGCAGGAGAAA	up	2.97841	0.000896479	up	2.98436	0.00023578
BIRC2	Gallus gallus finished cDNA, clone ChEST1034o19. [CR407264]	A_87_P012189	ACAGAACTTGAGCATGATGTCATTAAGCAAAAGACTCAGACACCATTGCAAGCAAGGGAA	up	2.9701	0.000552153	up	2.17322	0.00332567
TNFSF15	Gallus gallus finished cDNA, clone ChEST1015i24. [BX930081]	A_87_P024446	TTTTTTATGGGTCAGGTAGGGATATTTATCGTAAATAGGCTAGGCTGCATCACTAATTCC	up	2.94291	0.000168867	up	1.86484	0.00242075
DEDD	Gallus gallus finished cDNA, clone ChEST624f24. [CR407323]	A_87_P012150	TTGGATTCACATCGGAGCAGATACACGCAGAGCAGAGGAGCTCCTCATTAAGGAACCACG	up	2.94188	0.0991985	up	2.8399	0.145978
M-RIP	Gallus gallus finished cDNA, clone ChEST909g2. [CR523904]	A_87_P011291	TGCAAGCCAAGTTGAAAATGGAAGAGACCAACTACCACAATCTGGAGCAGTCGTTTGAGG	up	2.92655	0.00585617	up	1.98996	0.0345772
NPFFR1	Gallus gallus NPFF1 mRNA for neuropeptide FF receptor 1, complete cds. [AB120326]	A_87_P038077	AGTGGAGGGGAATAGGGATTTGCAAAGTCATTGAAATAAAGGCACGACCTGCTGATGTCA	up	2.92138	0.0289345	up	2.51858	0.0479186
CR389387	Gallus gallus finished cDNA, clone ChEST976i10. [CR389387]	A_87_P014856	TTGAAGCGGTGGGTAAGAAATTACATGAGTATAATACCCAGTTCCAGGAAAAAAGCCGAG	up	2.87872	0.0136537	up	1.62205	0.225654
AZIN1	Gallus gallus mRNA for hypothetical protein, clone 22c14. [AJ720630]	A_87_P036280	AAGCTACAGCTACAATTCACCGGGGGGAGGGAGGGTTAGATAATGGCATCCAAATTTAAA	up	2.87415	0.0074095	up	1.89095	0.228829
CN606329	EST00003 Black-bone Chicken's Liver Differential Express Library Gallus gallus cDNA 5', mRNA sequence [CN606329]	A_87_P020386	TTAAGCACTGTTTGATCTCTGGAAACTAAATCTGACAGATTGCCACGATTCAGTCTGTTT	up	2.8669	0.0615424	up	1.8537	0.242624
RASSF5	Gallus gallus mRNA for hypothetical protein, clone 32b8. [AJ720993]	A_87_P036020	GGTTCTGAAACTACTTATTCATATGCAGACAGTGTAAAGGACAACAACAATAAAACTGTC	up	2.85715	0.0167966	up	2.51469	0.0548478
AI981492	pat.pk0054.h7.f chicken activated T cell cDNA Gallus gallus cDNA clone pat.pk0054.h7.f 5', mRNA sequence [AI981492]	A_87_P037548	AGTATGTGTTAGCGAGCCAGTAGCTGGCAAAAGACAGGAGCACTCTCATAACACAGAAAT	up	2.81449	0.00792145	up	2.95247	0.0126031
AJ851732	Gallus gallus mRNA for hypothetical protein, clone 22p10. [AJ851732]	A_87_P035580	TACATGGAACATGCAAAAGGCATCCCTGTTGTCAAGTTTTCTGCATTGTGAATGTATGAC	up	2.79702	8.28084e-05	up	2.41286	0.0193652
TSHZ2	Gallus gallus finished cDNA, clone ChEST524e10. [CR385941]	A_87_P016812	CTGTCTGGTCTCCACTGTCCCTTTTTGCTGTCACTAAAACAAAGTGCCACTGAAGTAAGA	up	2.79109	0.00515709	up	1.86924	0.0396527
CR352507	Gallus gallus finished cDNA, clone ChEST178k15. [CR352507]	A_87_P018547	TCTGATGTCTTTCCTATTAATATCTTTCGGTGCTAAGCTGTCTTTGACTTTTAAGTACAG	up	2.76867	0.112858	up	3.98244	0.0847045
LOC422670	Gallus gallus finished cDNA, clone ChEST748a20. [CR407153]	A_87_P012264	TTTACAGACCACATCTGTGTAACTATGGATGCTGAATTGATTATGTTTCTGCATGACTTG	up	2.76314	0.47797	up	2.24081	0.612026
TSHZ2	Gallus gallus finished cDNA, clone ChEST205g1. [CR385875]	A_87_P016857	AGTGACAGCCCGGTTTCAAAGTCAATCGGTAAATCATCATCTGCAGAATGCATAGCTCCT	up	2.7501	0.000820244	up	1.66901	0.0588136
FILIP1	Gallus gallus finished cDNA, clone ChEST977h5. [BX929400]	A_87_P024739	CACATGCTGAAGACAGAGAAAACCAAACCTGAAGTTTTAGAAGCTCACTATGGCTCTGCA	up	2.7437	0.00108253	up	1.72204	0.0404471
RCJMB04_33h8	Gallus gallus mRNA for hypothetical protein, clone 33h8. [AJ851792]	A_87_P035539	TGCTAGTGGAAAGCAGATCGGCTGTGATGTAAAATGGGTAGATAGTGGGAAGCCACTTTT	up	2.73611	0.0875025	up	2.48501	0.152942
BI392229	pgp1n.pk007.d19 Normalized Chicken Pituitary [BI392229]	A_87_P034918	ACAAAGTCAGTGTTTCATTACACCTTCAGCATGTGGGATGAGGCTGCTTTCCATTTGGCT	up	2.7315	0.0186867	up	2.97256	0.0115982
HOXA1	Gallus gallus transcription factor HOXA1 (HOXA1) mRNA, partial cds. [AY188521]	A_87_P035248	TCCTCTGAGTTTCCCTGGGTGACAGACAGGTCACGGAGGGTACATAACCTCACGAAGAGA	up	2.72883	0.00112341	up	2.63281	0.00298274
BID	Gallus gallus BH3 interacting domain death agonist mRNA, complete cds. [AY112660]	A_87_P035275	AACTAAGAAAGTGGCAAATCAAATGCCTTCCCTTCTACAGCGTGTCTTCAGCACCACTGT	up	2.72749	0.183729	up	1.3935	0.434918
CR405770	Gallus gallus finished cDNA, clone ChEST880g17. [CR405770]	A_87_P013208	TCAAAGTAACGTGGTCCGATCTTTCAGTAACGTGTGTAACAAAAACACACCAGGAGCTTC	up	2.69751	0.0359128	up	2.89927	0.0479186
CEPU-SE	Gallus gallus CEPU-Se alpha 2 isoform (CEPU-Se) mRNA, complete cds. [AF292935]	A_87_P037716	AACTACACCTGCGTGGCCTCCAACCAGCTAGGAAACACCAACGCCAGCATGATCCTTTAT	up	2.68316	0.00107887	up	1.6382	0.0162684
USF1	Gallus gallus downstream stimulatory factor 1 (USF-1) mRNA, complete cds. [AY639121]	A_87_P035098	GATGGACAACGAGGTCTTACGGCAGCAGGTGGAGGAGCTGAAGAGCAAGAACCTGATCCT	up	2.65362	0.193384	up	2.14359	0.305425
EBF	Gallus gallus mRNA for early B-cell factor (EBF gene). [AJ238322]	A_87_P037501	CATGAATGGCTATGGGAATGCTGGAATGTCAAATTTAGGCGGTTCTCCAACCTTCCTGAA	up	2.6343	0.000834534	up	2.33365	0.00585456
ABCB7	Gallus gallus finished cDNA, clone ChEST91b16. [CR385576]	A_87_P017063	ATTCATTGGCATCTGCAAGAGCTAAGGTTTTTCATAAACTTTGGACTTCTCAAATAAGAG	up	2.62546	0.357738	up	2.38972	0.449432
ECM2	Gallus gallus finished cDNA, clone ChEST64n21. [BX933407]	A_87_P023042	ACCATCTCCAATGAAGCATTCAATGGGATACCTAATTTGGAATGGATCGATTTAAGTAAA	up	2.62213	0.212399	up	2.0232	0.36177
RCJMB04_26g6	Gallus gallus mRNA for hypothetical protein, clone 26g6. [AJ720817]	A_87_P036156	AGCAATAACAAAGTGAACTTCCTGCTCCTAGCCTCAGACTGCACCACTGTAGCTAGATTT	up	2.60359	0.218508	up	2.37909	0.262195
BF723704	EST00696 DT40subNB Gallus gallus cDNA clone 14A12, mRNA sequence [BF723704]	A_87_P034993	TAACAGGAAAGGCTGTGGTGAGTCCTGCAAAGTCTGTACTGGGCAGTTTCAGTGTATTTT	up	2.57906	0.00181534	up	1.57907	0.0500473
CO768254	spleen_EST03980 Spleen cDNA Library Gallus gallus cDNA 3', mRNA sequence [CO768254]	A_87_P019507	AGCATTACAGTTAAACAGTGAAGAACATCCAGTGTAAACTATACATATACCAACTGTTCC	up	2.57611	0.641127	up	2.54315	0.675912
LOC426948	Gallus gallus finished cDNA, clone ChEST621n4. [CR390682]	A_87_P013994	GGAGGATCTCAGGCAAAACTACGCCAACAAATTGCAGCAGGTGTCCAAAAAGGAGCAGCC	up	2.57297	0.0765543	up	2.06982	0.151884
CR386524	Gallus gallus finished cDNA, clone ChEST336c16. [CR386524]	A_87_P016421	AGCTTTGGTCCTACCCATGCTCCCTGGTTAGCGTTGTTCCTCCCATTCTGGTGCCAGAGA	up	2.55774	0.00553665	up	1.85896	0.0338303
LECT2	Chicken myeloid protein (mim-1) mRNA, complete cds. [M29449]	A_87_P009368	TCCCGGGTACATATCTCATATTCATGTTGAGAACTGCGATCGCTCAGATCCTACTAGCAA	up	2.53963	0.0496164	up	1.45964	0.390018
LOC424585	Gallus gallus finished cDNA, clone ChEST219p14. [BX932005]	A_87_P023696	ACGTCCCCCAGAGGTCCCTTCCCCTTCACCATGGTGGGATGTACCCTCAGTCTTAATAAA	up	2.53175	0.211941	up	1.38338	0.45557
ADMP	Gallus gallus anti-dorsalizing morphogenetic protein (ADMP) mRNA, complete cds. [AF082178]	A_87_P037927	CGGTGTCCTGTAAATGTCTGTACATTGCTGCGTTTTGTAAAGTGACCTCAGAGGAACTAT	up	2.52831	0.137057	up	2.34425	0.277813
PHPT1	Gallus gallus finished cDNA, clone ChEST655h17. [BX950285]	A_87_P021712	AGAATTCTAAAATGGGAACTTAATTACAATGTGTTGGGTTTCCTCTTTTGTAGGTGTGTG	up	2.52531	0.463758	up	2.5834	0.4966
BX932699	Gallus gallus finished cDNA, clone ChEST494i20. [BX932699]	A_87_P023397	AAAGAGGATGCGAATTCCCAAGAGACCTTCCTGGACAGCAGCCACCTGGAGCTCGGCAAT	up	2.52396	0.00430378	up	2.21417	0.0195624
RCJMB04_22m21	Gallus gallus mRNA for hypothetical protein, clone 23k18. [AJ720702]	A_87_P036235	TACCATACTACTTCTTAAACAAATAGCAGATGCACTTTTGTGTCAAAACCCATAACGATC	up	2.51322	0.0354429	up	2.03762	0.161766
HOXC9	Gallus gallus finished cDNA, clone ChEST49l2. [BX950823]	A_87_P021433	ACACGGGACCGGAGGTACGAAGTAGCCCGAGTCCTAAACCTCACTGAACGCCAAGTCAAA	up	2.5076	0.00128952	up	1.66842	0.0172138
MMP23B	Gallus gallus finished cDNA, clone ChEST739l3. [BX929570]	A_87_P024676	GATGAAAAAGCACTGTCCATTCGCCTGTGACTTCTGCTACGAATTCCCATTTCCAACAGT	up	2.5075	0.00202491	up	1.51075	0.0560436
TC202396	A45388 protein-tyrosine kinase - chicken {Gallus gallus;} , partial (4%) [TC202396]	A_87_P006334	AATTTTCCCCAATTAGGTTTGGCTCCCTCCGGGAAGGACACCACAGAACACAATCAAAAT	up	2.50503	0.160505	up	1.73332	0.317956
SOX18	Gallus gallus transcription factor SOX18 (SOX18) mRNA, complete cds. [AF302936]	A_87_P037704	CAACGAGCAGCCATCCTCCTCCAAATGCGAGCTCCGTAATATGTAGAGTATCTCATTAAA	up	2.49085	0.000891615	up	1.50191	0.0198271
CD83	Gallus gallus finished cDNA, clone ChEST705a17. [CR733120]	A_87_P010821	AGGGGCTTCTGACCAGAAGAATGGTTGTAAGGGATATGGAATTTTCTTGGGGCATGGTAA	up	2.47124	0.000407849	up	2.27358	0.00126333
GHR	Gallus gallus finished cDNA, clone ChEST1006h2. [BX933754]	A_87_P022885	CCTTTCTGAAACTGGTGGAAACTTCATCTTACACTTCTACAGACATCTGTAACAGAGAAT	up	2.45859	0.010603	up	1.23861	0.381425
MMP7	Gallus gallus mRNA for hypothetical protein, clone 1g18. [AJ719326]	A_87_P037168	CCTGATGTACCCTCTCTACTCATATGTGAACCCAGAAACCTTCACACTTCATTGGGATGA	up	2.45345	0.00185329	up	1.58128	0.0311685
NINJ1	Gallus gallus finished cDNA, clone ChEST78b1. [BX935591]	A_87_P022058	AAGCCTGATGCTAAGGTCATCCATCTCTGCTAGACATCAACAGTATTCAACTTACAACCA	up	2.43139	0.000281418	up	2.13559	0.00150278
CAV3	Gallus gallus caveolin-3 mRNA, complete cds. [AY363370]	A_87_P035189	ACACCTTCTGCGATCCGCTCTTCGAGGCGCTCTCCAAGATCTGCAGTAACGTCAGGGTTA	up	2.42312	0.0748194	up	2.23219	0.138423
CN220295	WLA014H10.ab1 WLbrain Gallus gallus cDNA 5', mRNA sequence [CN220295]	A_87_P020824	TTTCGGGGCGGTGTCGGTGCAGGGGAGCCCCCACCAGCAGTGCCAAGTGCTGTAATTTTT	up	2.40276	0.260832	up	2.7753	0.237665
KLF5	Gallus gallus finished cDNA, clone ChEST429a18. [BX935940]	A_87_P021881	ATGAATGGACACAGTGGAAAAGCCATGCATTGTAATCTGTCAGGGTTTTACTGAACTTGT	up	2.39209	0.344362	up	1.87912	0.535918
BX931131	Gallus gallus finished cDNA, clone ChEST698a7. [BX931131]	A_87_P024044	CCCAGAGATACAGTTTAAGTCTAATGCCCCCGAGGCAGTAGAAAGCGCAGCTGTCTCTGG	up	2.37816	0.2041	up	1.33981	0.667364
PDLIM4	Gallus gallus reversion-induced LIM protein (RIL) mRNA, complete cds. [AF167295]	A_87_P037837	GATCTCCAGGGGATGGTGTTGAAAGCGTATGAACAGGTTTTTCCCTTCTCTTTTGACACT	up	2.37815	0.00618394	up	1.39244	0.21262
CR523397	Gallus gallus finished cDNA, clone ChEST577d16. [CR523397]	A_87_P011639	GCCCCGTCGCCGTTGAGTTCTCCCCACGACATCTGGAAGGCCAAAAGCTCGACGGATTCA	up	2.37781	0.00564807	up	2.31239	0.0167587
CRH	Gallus gallus mRNA for corticotropin releasing hormone precursor (CRH gene). [AJ621492]	A_87_P037220	ACCAGAGCCATCACACCGCCCGACGTACCATAGTGCTGCTCTGATGTCACCTCTTTATTT	up	2.37701	0.017756	up	1.33833	0.579296
GCG	Chicken mRNA for prepro-glucagon. [Y07539]	A_87_P008759	TTAGACTGTAAGCTCTTCGGGGCAAGGATTTCAGTTCATCCTATTATTATATGTTTTGCT	up	2.36415	0.0468471	up	3.23637	0.0374567
CR352626	Gallus gallus finished cDNA, clone ChEST153k21. [CR352626]	A_87_P018469	GCAAGCAATCAGGAAATACGGACGAGACTTTCAGGCAATCTCTGATGTGATCGGTAACAA	up	2.35644	0.0882232	up	1.71934	0.178574
AGC1	Chicken cartilage chondroitin sulfate proteoglycan core protein mRNA, partial cds. [M38187]	A_87_P009340	TCCTGAAATTAGCATAGAAACATCCACAGTCCATGAAATCAGTGGGGAAAGTTCTGCCTT	up	2.35641	0.136384	up	1.17417	0.786736
RCJMB04_2h7	Gallus gallus mRNA for hypothetical protein, clone 2h7. [AJ719447]	A_87_P037085	TGAGAAAATACAAGCAGAAAGACACGTTGAACATCAATGGATCCACAGAAACCCCACAAG	up	2.34327	0.0113196	up	1.56516	0.106939
LOC415708	Gallus gallus finished cDNA, clone ChEST637h3. [CR523171]	A_87_P011793	GGAGATCACACTAAGGAAGAACAACAGTTATTAAGTCCTTCCAACTAAGCAGTGTGTGAG	up	2.3341	0.000754609	up	1.9887	0.00298274
LOC395952	Gallus gallus CLIM-2 (Clim-2) mRNA, complete cds. [AF069991]	A_87_P037944	GCAGCACTATGAGCTCCGGCGGTGGAAACACCAACAACAGCAACAGCAAGAAGAAGAGCC	up	2.33364	0.0582135	up	1.75031	0.208644
AJ245903	Gallus gallus partial mRNA for putative NK receptor (b-NK gene). [AJ245903]	A_87_P037493	ACAAAAGTGGAGGGCGACGTCTGTAGTGGTGAACACCAGTGGGTCTGCCAGAAAGAACCT	up	2.32512	0.102434	up	1.43765	0.465719
AM067211	AM067211 Chicken immune 3 - CSEQRBN33 Gallus gallus cDNA clone C0000473L08_T7, mRNA sequence [AM067211]	A_87_P035371	TCACCAAATCACCTGGCTCAACATTTGAAAGAAAAACCTATGTCAACCGCCATGCGACAT	up	2.31655	0.0131169	up	1.78203	0.0943154
LY6E	Gallus gallus clone 80 stem cell antigen 2 (Sca-2) mRNA, complete cds. [L34554]	A_87_P009472	TCCAGTATCAGAGACCTAATTGGCTGGGCCTAACCCTACTCCTCCTCCTTTGGACGTACC	up	2.31052	0.0106966	up	1.5698	0.133539
CR390479	Gallus gallus finished cDNA, clone ChEST442p9. [CR390479]	A_87_P014124	AACAGCTGTGTGTGAACACACCGGGAGACTATGAATGCCTGTGCCATTCTAACTACAAAT	up	2.30604	0.0518022	up	1.5689	0.284436
RCJMB04_1i6	Gallus gallus mRNA for hypothetical protein, clone 1i6. [AJ719340]	A_87_P037157	AGCAGTGAAACAAGTGAAATTCTGAAAGGGAAAAGTTCTGGTAATGGTACATCAGTTCCA	up	2.30275	0.299505	up	1.45751	0.671295
BX932155	Gallus gallus finished cDNA, clone ChEST1034f21. [BX932155]	A_87_P023623	ACAATAGCTGTTTATCTAATTCCAAATCTCAATCAGTGTCAGGAACATCTGAGCAGCTGT	up	2.30091	0.0674123	up	1.90423	0.166687
CA786344	pgn1c.pk011.l9 Chicken lymphoid cDNA library (pgn1c) Gallus gallus cDNA clone pgn1c.pk011.l9 5' similar to emb [CA786344]	A_87_P021410	CTTACCAAAGAAAGCTGCTGGATTTTTTCTCTCTGTAGAGCCAGCCAATGTGTCCTGTAC	up	2.30008	0.13911	up	1.78064	0.307195
AJ392435	AJ392435 dkfz426 Gallus gallus cDNA clone 11h24r1, mRNA sequence [AJ392435]	A_87_P037445	CGCTAATTAATCCGCTCATTAACGGGCTCTCGTTAACGACACAGTTCCTACCGATATGTT	up	2.29212	0.237852	up	2.18163	0.284267
LOC419770	Gallus gallus finished cDNA, clone ChEST553j6. [BX931806]	A_87_P023778	CTGCGTGGCTCAAAACAATGCTGAGAGCCACACAGGCATCTGTTTTGGGGGGAGCAGTGT	up	2.29098	0.00235839	up	1.68298	0.0269313
BDKRB2	Gallus gallus bradykinin receptor B2 (BDKRB2), mRNA [NM_001031553]	A_87_P009219	CTCAGGACACTTTAAGAACTTCCATTTCAAGTGAACATCTAAGAAAAAAGTCTGTTTTGC	up	2.29048	0.0490405	up	2.00719	0.110659
TRAF3	Gallus gallus finished cDNA, clone ChEST436c15. [BX935958]	A_87_P021869	AAATGTGAGATCTAAAGAAAAGCTTTTTCTACCACACAGTTAAGTGTGAAACACTCGAGT	up	2.28501	0.00127319	up	2.17088	0.00228518
ACSBG1	Gallus gallus finished cDNA, clone ChEST30e10. [BX936010]	A_87_P021842	AGTTATTCCCAATACTCACCTGATAGTTTGTCCTGTTCTGTACAGTGTGTCCATTTTCTA	up	2.28052	0.16033	up	2.06251	0.216267
TC220645	B39218 nicotinic acetylcholine receptor alpha-5 chain precursor - chicken {Gallus gallus;} , partial (12%) [TC220645]	A_87_P002644	TTTGCCTGCTCAACACTTTAAAATCCTGTTTAATTTCCTTCCCCTATTTGAGTGTGGCCC	up	2.27329	0.499598	up	1.27437	0.788694
ST6GALNAC5	Gallus gallus partial mRNA for alpha-2,6-sialyltransferase ST6GalNAc V (SIAT7E gene). [AJ646877]	A_87_P037214	GCGGACATTCAACATTCACTTCTTCCAACCAGACTGGAAACCAGAACCACTTACTGTAAA	up	2.26922	0.314291	up	1.15209	0.858805
MAP4	G.gallus mRNA for microtubule-associated protein 4. [X86819]	A_87_P008804	TGGTCCCTAAAATGGCTCCAACTAAAACAGCTGTAACAAAAGAGGGTGTCCCAAAACAGC	up	2.26484	0.0144863	up	1.88701	0.0585423
SLC33A1	EST00968 DT40subNB Gallus gallus cDNA clone 10G9, mRNA sequence [BF845723]	A_87_P034977	ATGCATGTGCTGACATGTGAGGGAGCACAGTGCGCAACGTTCTCACAATGTGTATACAAT	up	2.25965	0.0591446	up	1.8205	0.179513
CTR BETA 2	G.gallus mRNA for thyroid hormone receptor beta 2. [X62642]	A_87_P008885	CTTTTTCTCAAGTGCAGTCGCCATCGTACTCTCAGAAGAAAGGGTATATACCCAGTTACT	up	2.25462	0.0659411	up	1.55813	0.259285
GCH1	G.gallus mRNA for GTP cyclohydrolase I. [Z49267]	A_87_P008690	TCTGTTCTTACTTGCCCCTACATCACACTCTTAAACTAAGTCGCCGTGAGCTGTTGTCAT	up	2.25031	0.000552153	up	1.44014	0.0225563
DLX3	Gallus gallus mRNA for DLX3 protein. [AJ243432]	A_87_P037497	TCCCAGCTCATCTCAGGAACAACGGGACTGCAAAGGGTTGAACTCGTGAGCTCTGCGCCC	up	2.24174	0.0938542	up	1.62269	0.289719
CR524252	Gallus gallus finished cDNA, clone ChEST1005k7. [CR524252]	A_87_P011025	CTATCTAACCAGTGATGGCTCAGCCAAAAACTCCTGTGTGTCCAAAGATGTTCCTAACAA	up	2.24167	0.0488	up	1.71766	0.214297
NOS2A	Chicken macrophage nitric oxide synthase mRNA. [U46504]	A_87_P009073	GGTCAGGTACACCAAACTTAATTTTTGTTGTTACAGAGCCTGTAGCAATGAGGTTCAGAA	up	2.23997	0.0023142	up	1.39444	0.04207
CR523275	Gallus gallus finished cDNA, clone ChEST612n4. [CR523275]	A_87_P011724	CTCTCATATACTATTAATCAGGAAACTAACATATTAAACAGCTGTTTGAGAAGCTTCCGG	up	2.23954	0.0035171	up	1.82572	0.00581007
NFKB2	Gallus gallus p50B mRNA for p50B/p97 (Lyt-10) transcription factor, complete cds. [D16367]	A_87_P009806	CGCTCTGCTCTTATTTAACGGTCCCGCGCCTGGTGAATAAAAGGGGACACGGCTTCCCTT	up	2.23631	0.000891615	up	1.61256	0.00446437
BI393004	pgp1n.pk009.m6 Normalized Chicken Pituitary [BI393004]	A_87_P034914	AACAATGCAACACGTGCAGTGCGAGTAGCAGTAGAGCAGATGGCCAATTGACAAAAGTAT	up	2.23519	0.212534	up	1.53421	0.477485
CR353273	Gallus gallus finished cDNA, clone ChEST42j19. [CR353273]	A_87_P018047	ACCCTTCCTTCCCAGGCAGGAGGTTATTAACTTCCATGTCAGGAGTAAACCACTGTAATA	up	2.23218	0.210251	up	1.1507	0.910098
BI390057	pgp1c.pk003.a17 Primary Chicken Pituitary [BI390057]	A_87_P034928	TCCGCTTCTACGTGGGCAACCGCAAGGCCATCTCCGAACAGAGCGGTGCCATCGTCTACT	up	2.22825	0.19122	up	1.81247	0.386227
LRAT	Gallus gallus finished cDNA, clone ChEST599j16. [BX930363]	A_87_P024337	TTTATCACCTAGCTGTGTGCCTGCGTGCTACAGCTATTAATAAAAATAGATGGTGGAGTA	up	2.22207	0.481299	up	2.22221	0.523518
BG625520	pgn1c.pk003.d1 Normalized chicken lymphoid cDNA library Gallus gallus cDNA clone pgn1c.pk003.d1 5' similar to emb [BG625520]	A_87_P034974	TGGGCTGACTCTGGCAAGTGGTGGGACCTTCCCTCACGATGATGGGTCAAAGCAAGAAAT	up	2.21745	0.0719184	up	1.55463	0.290075
WDFY3	Gallus gallus finished cDNA, clone ChEST582m17. [CR524049]	A_87_P011182	AACATCAATGATCCATTAAAAGAGACAGCAACTATAGGATTCATTAACAACTTTGGGCAG	up	2.20947	0.0101694	up	1.90243	0.0311685
LGALS1	Chicken 14K beta-galactoside-binding lectin mRNA, complete cds. [M11674]	A_87_P009409	TCTCAAGCCTGGCCAGCGCCTCACTGTCAAGGGGATAATCGCACCGAATGCCAAAAGCTT	up	2.20131	0.446939	up	2.04171	0.531187
ARHGEF17	Gallus gallus finished cDNA, clone ChEST135b10. [CR407478]	A_87_P012045	TTATTTGAAGCCTCCTGGCTCTGTTGCTGGAGAGGATGTCATTAATAAACGAGCTCTGTT	up	2.19611	0.00116216	up	1.62404	0.0122748
ZNFN1A2	Gallus gallus mRNA for Helios lymphoid transcription factor (HELIOS gene). [AJ289886]	A_87_P037467	AAGCTTCTAAGGGCTCTTTAAAGGATATCTACAAGGTCATCAATGGAGAAGGGGAGCAGA	up	2.19542	0.0595246	up	2.22386	0.0855656
CN224482	RJA101F02.ab1 RJbrain Gallus gallus cDNA 5', mRNA sequence [CN224482]	A_87_P020779	GAGCCAGGTCCGTTGAAGAGGAAGTGCTCCTTTTGCACTACTTGCATTTCTAGTAACATA	up	2.19121	0.000435753	up	1.86537	0.0150884
CV890145	4141765 BARC_4GAL chicken mixed tissue Gallus gallus cDNA clone 4GAL_10I14 5', mRNA sequence [CV890145]	A_87_P009832	ATACACAGTGTCTGTAATTTATTTGCTCTTCTACTACCTTACCTCTTCCCCCAGCAGATT	up	2.19119	0.258507	up	1.14083	0.860567
MRPS14	Gallus gallus finished cDNA, clone ChEST991g5. [BX929470]	A_87_P024709	AGAAAAGCCACACTGACTTATTTACTGGATTGTGATTGGTATCAGCTCATTGACAAGCAG	up	2.18658	0.0404967	up	1.09545	0.834809
ZNF292	Gallus gallus finished cDNA, clone ChEST927h4. [CR390207]	A_87_P014301	TGACACCAGGTCAGGAAAACATTTCAAGCAAAGCAAACCAGGAGAAACCAGTGAAGTCCA	up	2.18553	0.00543755	up	1.51945	0.149969
RCJMB04_16a22	Gallus gallus galectin-8 variant II mRNA, complete cds. [AY840215]	A_87_P035040	TCTAACTCTGTACAAGGCGCTCAGCCATCATCTGTAGGAGTAACAAAGATAAACACAGAA	up	2.18538	0.15357	up	2.23206	0.180651
TC220868	Q08514 (Q08514) Gallus gallus POL-like (Fragment), partial (15%) [TC220868]	A_87_P002615	CTTCTTACAGCCTCCATTATAGATACTGAAAGGCCACTCTGAGGTCTTGTTGGAGCCATT	up	2.18079	0.400666	down	1.40306	0.667821
CPNE5	Gallus gallus finished cDNA, clone ChEST563k2. [BX950559]	A_87_P021579	GCAGGCATTCAAGATTTCTGTCAGAGCACTGTGTAACGGAGACTATGACCGGACAATTAA	up	2.177	0.00430378	up	1.30104	0.170658
HOXA11	Gallus gallus homeodomain-containing protein (GHox1i) mRNA, complete cds. [M81250]	A_87_P009293	TCATCTTCCGGCAACAATGAGGAGAAATCCGGCAGCTCCAGTGGGACAACGGACCCGTAA	up	2.17531	0.0197011	up	1.85036	0.0663969
LOC418772	Gallus gallus finished cDNA, clone ChEST120p20. [BX932610]	A_87_P023427	TACAGAGAAGCTGTAAGGTTGAACCCTAAATACGTACATGCCATGAACAACCTTGGAAAT	up	2.17131	0.239611	up	1.76463	0.403306
SETDB1	Gallus gallus mRNA, partial cds, clone CLFEST22. [D26324]	A_87_P009798	TCTCATTCCTGCCCGAAAGAGAGAAAATCAGGTTCGAAGAACAGCTGTCACCCCACCATC	up	2.17099	0.00143276	up	1.50985	0.0184384
CR385991	Gallus gallus finished cDNA, clone ChEST212h16. [CR385991]	A_87_P016771	CTGTCAGGAATCTACCGGAGGGAATTTAAGGAGAACAAAGAGCCTTCTCCCAAAGTGAAA	up	2.16855	0.0112501	up	1.47491	0.17288
LOC396164	G.gallus gammaFBP-A mRNA. [X79051]	A_87_P008824	ATCTGTGCCCATTTTGGGGGCCGAGCACCGGCAGTAGCTGCACCCAAAGCACAGCTGGAA	up	2.16569	0.00491079	up	1.34251	0.0758942
BX932756	Gallus gallus finished cDNA, clone ChEST479a18. [BX932756]	A_87_P023376	AGTATGATCTTTAATCAAGTGTGATGGTTTGGTTCACAAACATGTGAATGCAGTACCTCA	up	2.16531	0.156079	up	1.37448	0.4757
SYNE1	Gallus gallus finished cDNA, clone ChEST491a10. [BX936082]	A_87_P021808	AGAAGTTGAAAAAACAACAGAGAATTGGAGACCAGGCTTCAGTACAGAATGCTTTGAAAG	up	2.16248	0.0307429	up	1.47506	0.234629
RTTN	Gallus gallus finished cDNA, clone ChEST932l22. [CR406911]	A_87_P012439	TGCTACAGTGCTTAAGGCTAACAGATGCACCACATTTTTATGGACTTCCTTCACTGGAGA	up	2.16184	0.136384	up	1.91207	0.237784
PCDH19	Gallus gallus finished cDNA, clone ChEST197h6. [BX933372]	A_87_P023062	TGGAAGGAGACAGAGGATTTTTTGAGATAGACCAGGTCAATGGAGAGATAAGGACCACCA	up	2.16041	0.0142047	up	1.40451	0.176057
ALS2	Gallus gallus finished cDNA, clone ChEST370c16. [BX930860]	A_87_P024162	AGCAAGCTTACTTTCCAGCAACAATGGACAGGAAGACAGTGGAATTTCTAGCCCTGGAAA	up	2.15684	0.0298681	up	1.54762	0.141014
GLUL	Gallus gallus glutamine synthetase mRNA, nuclear gene encoding mitochondrial protein, complete cds. [S45408]	A_87_P009202	GGCACTGTCACATTTCTAGGCTCCTTCTTGGCATCGAGCGTGTGGTGTAGGAGCACCTAG	up	2.1506	0.000320508	up	2.10882	0.037726
CN229249	RJB068H03.ab1 RJtestis Gallus gallus cDNA 5', mRNA sequence [CN229249]	A_87_P020652	GGTTTTGCGGGGCTCTGTTTTCAAACCAGTTCTCTTTAATGTTTTCATCGATGACTCCAA	up	2.14435	0.169944	up	3.98811	0.0468359
CD218734	pgr1n.pk007.n19 Normalized chicken reproductive tract cDNA library (pgr1n) Gallus gallus cDNA clone pgr1n.pk007.n19 5' similar to gb [CD218734]	A_87_P021347	GGTGCCGGTGACCTCGACTCCATCACCTTCTTCTCCTTCTCGCTCATCGAGGGCTACATC	up	2.13712	0.0048113	up	1.75849	0.0185604
PLXNB1	Gallus gallus finished cDNA, clone ChEST41k24. [CR352679]	A_87_P018439	ACTGCTGCTTCAAATGTTTCTAACAGTAACATCAGTACTGGGGTGAACACAAGGCGGTCT	up	2.13555	0.0355779	up	1.78638	0.0805161
HOXA3	Gallus gallus homeodomain protein HOXD-3 mRNA, complete cds. [AF067959]	A_87_P037947	GAAGGCGTGTGAAGCTGAAAGGCTTAGATTTGTGTTGAAAGTTATACATTACCTTGCTGC	up	2.13466	0.00156021	up	1.83211	0.0115815
LOC419210	Gallus gallus finished cDNA, clone ChEST757b16. [CR406375]	A_87_P012820	TATAAGCCAAGAAGTGAATTGGAGGACATTGTGTCCAAGGGTGTTAGACTCTACTGCCGA	up	2.13384	0.0163389	up	1.70323	0.0471294
AJ720680	Gallus gallus mRNA for hypothetical protein, clone 23f3. [AJ720680]	A_87_P036251	GCATGGCCAGTTCCAAAACAAAAAGAAGTGATTAATTGCAAGAGGGACAAGTTGTTGCTG	up	2.13275	0.161979	up	1.1524	0.811888
GNAT1	Gallus gallus rod-type transducin alpha subunit mRNA, complete cds. [AF200338]	A_87_P037794	TCCACCAGGACGGCTACTCGTTGGAGGAGTGCTTGGAGTTCATCGCCATCATCTACAGCA	up	2.13211	0.302199	up	1.8975	0.408998
LOC395971	G.gallus mRNA for adenosine receptor 2b. [Y12601]	A_87_P008736	CAGGGGTGTTTCCCCAGTTGTGCTGCTCATGTCAAGTCCTCGGATCCTTATTTTAATTAA	up	2.13112	0.000961954	up	2.34285	0.000924226
LOC421052	Gallus gallus finished cDNA, clone ChEST63g12. [BX933406]	A_87_P023043	TCACTGCCATTAGAGAATGGTCCAGCCAAAGCAGACATGTACTCAACACCACAGTACAAA	up	2.13072	0.0381633	up	1.57272	0.215701
SDK2	Gallus gallus sidekick-2 mRNA, complete cds. [AF537108]	A_87_P037566	TCCAGAGCCCCCATTGGTGGGTTTTCCTCTTTTGTTTGATATTTAAAGGGGAGCAGAAGA	up	2.12829	0.00100712	up	1.5788	0.00718898
DYNC1H1	Gallus gallus mRNA for cytoplasmic dynein, partial cds. [AB221486]	A_87_P038038	ACTGAAGAGTGTGCTGGTTAGTGCAGGTAATGTGAAGAGGGAGAGGATTCAGAAGATAAA	up	2.12608	0.00930804	up	1.52976	0.0861988
CHD9	Gallus gallus finished cDNA, clone ChEST270i4. [CR389890]	A_87_P014517	GCTTTGTTTGTGTAGATTTCTATTTGTGTTTTATGTCATAAAACCTCCTGGAGTTACCAG	up	2.12405	0.245208	up	1.53238	0.530284
LOC420399	Gallus gallus finished cDNA, clone ChEST123k10. [CR389677]	A_87_P014661	GAGTCCTGCTGTTGACCAGCTATTTTCATTCAAAATAGCTGTTGTAATTTATTTTTCTCC	up	2.119	0.218579	up	1.96418	0.269549
RCJMB04_6j9	Gallus gallus mRNA for hypothetical protein, clone 6j9. [AJ719793]	A_87_P036853	GAATCAAGGAGAAAACAGCTAGAAGCAAGTCAAAAGAGAGGAGAAAATCCCAAAGCCCCT	up	2.11666	0.0346027	up	1.765	0.104756
AY686640	Gallus gallus homeodomain transcription factor (HOXA5) mRNA, complete cds. [AY686640]	A_87_P035085	TTACCATTCTCTCGCGTGTATAAGTAGATCTGCTTTTATCGTACATTTCTTTGTCTTGAA	up	2.11641	0.0050541	up	1.6981	0.0143014
PPP1R3B	Gallus gallus finished cDNA, clone ChEST790g10. [BX929811]	A_87_P024577	TCAGCTTGCCCGATGGAATTCAATCCCATGAAAGAGTTGAGTTTGCCATCTCCTTTGAGT	up	2.11529	0.00582374	up	1.7697	0.025159
GDF9	Gallus gallus growth differentiation factor 9 (GDF-9) mRNA, complete cds. [AY672110]	A_87_P035091	TGGAATAATATTGCATTTGAACAGAAGTGTTTTCAACTACCAGATGCCTCTTTTAAGCTG	up	2.11077	0.167586	up	1.36332	0.588058
CASC5	Gallus gallus finished cDNA, clone ChEST444n2. [BX934169]	A_87_P022712	CCTTTGATGCTGCAGACCGTTTTTGCCCATCTTTTGAACAGAAGGAAGATGCTACTACAG	up	2.11063	0.203755	up	1.55906	0.442841
CR391607	Gallus gallus finished cDNA, clone ChEST800n19. [CR391607]	A_87_P013338	TCACCCCCAATGGGAAAGGCGATGCTGATGGAATTGCACACCCCGGATCTCTGCAGGAAA	up	2.10974	0.00607165	up	1.35437	0.217919
TC188264	2206375A fragile X mental retardation protein. {Gallus gallus;} , partial (9%) [TC188264]	A_87_P008145	AGGAGGAGAATGCTTTATATAACTCTGACTTGTTCCAGATCAGAATTGACTGCAATAATG	up	2.10934	0.173591	up	2.13218	0.203429
KCND2	Gallus gallus shal-like voltage-gated potassium channel (kv4.2) mRNA, complete cds. [AF075160]	A_87_P037935	GGAAGCTTCTGTGACCATCCTGACTTACTATAGAGCACAATGAAATGTCCCCATTGATGC	up	2.10793	0.000968096	up	1.90217	0.0114465
BM490494	pgp2n.pk003.j2 Normalized Chicken Pituitary [BM490494]	A_87_P034841	TCACCTGAACGTGGGTGTGGCCCAGGCCTATGTCAACCAACGCAAGCTGGACCAGGAGGT	up	2.10166	0.0585929	up	1.7803	0.146393
TFPI2	Gallus gallus finished cDNA, clone ChEST171j17. [BX950344]	A_87_P021676	ACAATGTCTGTAGAAAAGGGAGTCAGAAACCAACCATCAACAAGTCAAGAAGTCTACCCC	up	2.09669	0.00264423	up	1.55641	0.0507662
CN228944	RJB064H04.ab1 RJtestis Gallus gallus cDNA 5', mRNA sequence [CN228944]	A_87_P020666	CCTTCCAGCTCTATGCAGCAGCATCCCCAGTGTGAATTAGTTTGGGATAACAGTTCAAAT	up	2.09401	0.517885	down	2.89866	0.170792
TGFB2	Gallus gallus transforming growth factor, beta 2 (TGFB2), mRNA [NM_001031045]	A_87_P009248	ACCATCCTCTACTACATTGGCAAAACACCCAAAATCGAACAGCTGTCCAACATGATTGTA	up	2.09123	0.00122915	up	1.40691	0.105022
TH	Gallus gallus mRNA for tyrosine hydroxylase (tyrosine hydroxylase gene). [AJ251387]	A_87_P037482	TGGAGAGTGTAAGGGACGAGCTTCATTCGCTGATTAACGCGCTCAATGTGATCAGTTAAT	up	2.0863	0.11627	up	1.55486	0.353672
CR385209	Gallus gallus finished cDNA, clone ChEST538e20. [CR385209]	A_87_P017276	CACAGTTCTGTACAATACCAATGATGCCTTAGGAGCCACCTGGAACTGGCTATACTTCAT	up	2.08542	0.11616	up	1.51246	0.484739
CR385263	Gallus gallus finished cDNA, clone ChEST548p18. [CR385263]	A_87_P017237	CGAGCAGGAGCAGACGTGCAAACACCAAAGCTGTGAGCAAAAGGACTGCGTTGCCAGCAA	up	2.08538	0.0016489	up	1.85887	0.00555224
BQ037664	pgn1c.pk006.o5 normalized chicken lymphoid cDNA library Gallus gallus cDNA clone pgn1c.pk006.o5 5' similar to no significant hits (pLog(P) 4), mRNA sequence [BQ037664]	A_87_P034826	AAGGGCACAGAAGGCACTAAGAAACAACAGGTCTCTTCAGGATATAGAGAACACTGTGCT	up	2.08469	0.00756318	up	1.29811	0.30753
BX934636	Gallus gallus finished cDNA, clone ChEST385a20. [BX934636]	A_87_P022498	AGGTTTTCATGGTGTATCAAAGGGCACAGCTTGGTACATAATGCCAAAATGGAGAATGCA	up	2.08179	0.0269485	up	1.95583	0.0445463
AJ394364	AJ394364 dkfz426 Gallus gallus cDNA clone 19b18r1, mRNA sequence [AJ394364]	A_87_P037425	GGCGTTACCTTTGATGTACACGCGGAAAACTCCGTCCTGCACGTAACGGCATGGCCAGAT	up	2.07996	0.00997517	up	1.74234	0.031239
LOC421368	Gallus gallus finished cDNA, clone ChEST598e24. [BX932427]	A_87_P023505	CTCACCACTAGCAACCCTTTGTCAGTTGTCATCCTTTTGTATCAGATTCTGGCTGCTGTT	up	2.07961	0.00423272	up	1.49879	0.0447908
SPON2	Gallus gallus finished cDNA, clone ChEST791l11. [BX931971]	A_87_P023712	GAGTGACCAGATGTTTGCAGCATGGTTAAGACAATAACATGACTGAGTAAACTTGTCTTG	up	2.07657	0.000320508	up	1.7824	0.000924226
HHIP	Gallus gallus finished cDNA, clone ChEST43a21. [CR353271]	A_87_P018049	ATGGGGAAAGAAAGAGCAAACACACACTTTAATGTATTGCGGATCTGTATCCTTGTGTCA	up	2.06997	0.00245071	up	1.30663	0.0963161
BX934292	Gallus gallus finished cDNA, clone ChEST50j24. [BX934292]	A_87_P022654	GCATCATGAATATAGAGCCTGCCATCCTTGTGATGCATCACTCCATGAAGCCTCACCCCG	up	2.06952	0.219953	up	1.79814	0.191326
ANKS3	Gallus gallus finished cDNA, clone ChEST200c9. [BX950728]	A_87_P021489	CAGGCTGTTTCCTCTGACTTTTCATCAGTGCTGCCATGTAAATAAAGTACAGCTGATTGG	up	2.06552	0.302639	up	2.21182	0.155883
RCJMB04_35g11	Gallus gallus mRNA for hypothetical protein, clone 35g11. [AJ721110]	A_87_P035936	GTCAACTGTCAGACCCAGATAGAGAAAATAAGAGCAGCTGAGAGCAGCGTATGAATGTAA	up	2.06308	0.000280551	up	1.6932	0.0144922
BX931516	Gallus gallus finished cDNA, clone ChEST393g10. [BX931516]	A_87_P023897	GAGTCGAATTTCAAGACTCACTACGCAGTGCGGGACACCACCGTGCTCTGCACGGATGAA	up	2.06029	0.101086	up	1.57023	0.307399
SEMA4G	Gallus gallus finished cDNA, clone ChEST326c8. [CR352446]	A_87_P018586	ACCGGGCTGGGCCCGGGCTTGGCCATCCATTTGGCTTTTCACTCACTTTTGAGACTTGAT	up	2.05929	0.00505998	up	1.8558	0.0242243
CBFA2T2	Gallus gallus MTGR1 mRNA, complete cds. [AY714076]	A_87_P035069	AGAGGCACAGCCCTGACAGAAGGGATGATAACAGCTTCGAGAGAGAGCCGCTGCCGACGG	up	2.05896	0.136651	up	1.9544	0.160086
TTN	Gallus gallus mRNA for connectin/titin, partial cds. [D83008]	A_87_P009770	ATTGGATCTGATTACGTCGTAATTTCCATGCCTGACTGACAATTTTTGAACAAAGTGCAA	up	2.05404	0.0643618	up	1.60525	0.217869
BX950848	Gallus gallus finished cDNA, clone ChEST673l1. [BX950848]	A_87_P021413	CTGCCACCTATGGGCTACAAAAAGGTATTTTGTTTTGCCTCGAGAGGAGGCAAAGGATTT	up	2.05313	0.000307964	up	1.40335	0.00902574
BX931927	Gallus gallus finished cDNA, clone ChEST803b20. [BX931927]	A_87_P023734	TGAGGGATGTCAAGCTGTACCTGACGGAGGAGGCTGGTCAGATCGCGGTTTTTGATGCCA	up	2.04897	0.0199695	up	1.70294	0.106853
DQ189216	Gallus gallus NPY receptor Y6 mRNA, complete cds. [DQ189216]	A_87_P009684	AACCTGCAAACTGATGTATCTAAGGGATCTCTGAAATTAAATAACCACCCTCCTGTGAAT	up	2.04896	0.388399	down	1.47858	0.548581
LOC422413	Gallus gallus finished cDNA, clone ChEST217a23. [CR353093]	A_87_P018173	ATGGTTTAAACATCAACTGCAGCTCAACATAATGCACTTCTAGGTCATCAGTGAAATTTA	up	2.04802	0.00102311	up	1.78357	0.00740953
NEIL2	Gallus gallus finished cDNA, clone ChEST208a16. [BX950724]	A_87_P021492	CTCCATCAGCTCTTAGCGGCCTCCTTCCAAAGGGTGAAAACACCCCTCAGCAGTGCAATG	up	2.04498	0.258507	up	1.72021	0.41403
BX934182	Gallus gallus finished cDNA, clone ChEST444b20. [BX934182]	A_87_P022703	CTGCGAGGGTAAAGGCATCCACAAGGAGCACAACATGGTGATGTTTCAGAGCCCGCTGCT	up	2.04215	0.00945465	up	1.60584	0.0503411
LOC423146	Gallus gallus finished cDNA, clone ChEST821d24. [CR353855]	A_87_P017688	GAGCTGAAGTTTCTGTGCAAGGACAAAATTGGGAAAAGGAAGTTGGAGTCTGTCCAGAGT	up	2.03907	0.0241845	up	1.49265	0.208644
CR386239	Gallus gallus finished cDNA, clone ChEST11i4. [CR386239]	A_87_P016620	TCCTGATGATATTGGTTCTAATAACTGTGGCTATTACGACCTGCAGGCAGTGCTAACGCA	up	2.03709	0.393487	up	1.77801	0.531349
P4HA1	Chicken prolyl 4-hydroxylase alpha subunit gene, 3' end. [M26217]	A_87_P009377	CCAGATTCTGCCTAAACAGTCTGATTTTCTGGATGATGATGGTTGTTACTGATTTAGGGG	up	2.03603	0.0255567	up	1.79295	0.0884012
CR353253	Gallus gallus finished cDNA, clone ChEST53c23. [CR353253]	A_87_P018061	CTACTTCTCCTTGGAGAAGACTAAGCAAGACTCAAAGCTGGAAGAGCAGCAGCTGCCACC	up	2.03253	0.0188107	up	1.66578	0.0866989
CR386551	Gallus gallus finished cDNA, clone ChEST902h16. [CR386551]	A_87_P016397	GTTTGAAGATGTAAGTCCGCAAGGTATTAGTGGATGATTCTAGTACAGGATCAAGAGTTC	up	2.03135	0.0338787	down	1.36043	0.845608
CR406057	Gallus gallus finished cDNA, clone ChEST458e12. [CR406057]	A_87_P013023	AGACTCCCAGCAATGCCTTATGCAAGGAATTTGGGGAGCTCTCCACGGACTCCTACGATA	up	2.03091	0.224489	up	1.85316	0.349286
TC224617	Q08528 (Q08528) Gallus gallus POL-like (Fragment), partial (26%) [TC224617]	A_87_P001313	GTAACCCCCATTGTTCAAGTCTTTGAACCTCAAGGAAAGTGACAAGGAAAACCAAGTCCC	up	2.0287	0.0160709	up	1.82583	0.0625927
ACACA	Chicken acetyl-CoA carboxylase mRNA, complete cds. [J03541]	A_87_P009545	TTGAACTACATCTTCTCACATGCTCAGGTCACCAAGAAGAACCTGCTTGTCACAATGCTC	up	2.02803	0.121315	up	1.44921	0.286586
CR406825	Gallus gallus finished cDNA, clone ChEST728n8. [CR406825]	A_87_P012501	CTTGAATAGGCTGGTCTTTTTACAGCCTTTTTGTATCTAAATTTAGATAACTGCAGAGAC	up	2.0269	0.105757	up	1.78445	0.186247
EOS47	G.gallus mRNA for melanotransferrin. [X91908]	A_87_P008791	CACCGCCTCGTGATCCCGGGACGTAGAGAGATTCGGCGTAATAACTAATAATAGTAATAA	up	2.0249	0.0240702	up	1.5764	0.121651
CR524035	Gallus gallus finished cDNA, clone ChEST584k22. [CR524035]	A_87_P011191	CTTTTCATCCTTAATGGACTGGAGCGCCTCAACTTGGATTTCCGACTGGCTGGCACCGAG	up	2.02002	0.117672	up	1.95222	0.138607
PDLIM7	Gallus gallus mRNA for hypothetical protein, clone 14g20. [AJ720300]	A_87_P036502	AGCACTGTAAATGCTTCTCCCAACCCCCACTCTCCAGTTGGGCTGCGTCTGATGTAGCCA	up	2.01962	0.00105603	up	1.82633	0.00165931
TEAD3	Gallus gallus cardiac-enriched TEA domain transcription factor (DTEF-1A) mRNA, partial cds. [U46127]	A_87_P009075	GAAGGAAGAACAAGAAAAGCAATAACCAAAAAAGACTGACTTGTGATCGCAGATGTTTTC	up	2.01909	0.00874091	up	1.77558	0.0375073
BX932374	Gallus gallus finished cDNA, clone ChEST98h5. [BX932374]	A_87_P023527	TGTACAAATAAACTGCAGCATTGCAAGGATCTGTAGCAGTATAAATAAATGGCATCTTAC	up	2.01837	0.238215	up	2.73795	0.00307025
CR354094	Gallus gallus finished cDNA, clone ChEST370m3. [CR354094]	A_87_P017548	TGTCATGGTAATAGGTGCTATGGTAGTCATGAAGTTGTATGTAGATTTATATTTTGTCCC	up	2.01739	0.102625	up	2.23095	0.113175
MCAM	G.gallus mRNA for HEMCAM, soluble form. [Y08854]	A_87_P008752	CTCCATCATTTACTTCCTGCACAAGAAGGGCAAGATCTCCTGCGGCCGCAGCGGCAAACA	up	2.01546	0.0140758	up	1.62841	0.023435
TC203434	A41642 dynactin - chicken {Gallus gallus;} , partial (5%) [TC203434]	A_87_P005762	TGGGGCAGTCTGCAACATGGGTACCCCCACCTCATCTGCAGCTGTTTCTGAGCACGTTTA	up	2.01105	0.216387	up	1.57442	0.499748
LOC422417	Gallus gallus finished cDNA, clone ChEST513i19. [BX933227]	A_87_P023139	GACGCTCCTGTAAAGACTTCTGTCAGGAACTGTCAAGCAAGCAATGGGAACAACAGTATT	up	2.00794	0.0199891	up	1.74905	0.0531748
LOC427406	Gallus gallus finished cDNA, clone ChEST645f3. [BX929857]	A_87_P024558	GCAATGATGAAGGAGCAGTACTCACACCATGCTCAGGTATTTGCTGCTAGATGTATTCAG	up	2.00738	0.253411	down	1.16174	0.831673
GLUR1	Gallus gallus alternatively spliced AMPA glutamate receptor, isoform GluR1 flop, (GluR1) mRNA, partial cds. [U59704]	A_87_P009054	GAGTCTCAGCAATGTGGCGGGGGTTTTCTATATCCTCATCGGTGGGCTCGGACTAGCCAT	up	2.00586	0.23002	up	1.45682	0.638217
CR406588	Gallus gallus finished cDNA, clone ChEST656a3. [CR406588]	A_87_P012679	TCGAACACTGCATTGTTCCAGGTGGTTATTTTCTTGTTTTCAAAAGTTTCACACGACGTA	up	2.00553	0.000961954	up	2.18939	0.000274116
BMPR1B	Gallus gallus mRNA for receptor protein kinase, complete cds. [D13432]	A_87_P009818	CAGGGATATACAGTTTTAGTAACTGGTTTAAGGTTATGCATGTTGCTTTCCGTGAAAGCC	up	2.00056	0.091865	up	1.97953	0.128558
DN928673	4154235 BARC_3GAL chicken mixed tissue Gallus gallus cDNA clone 3GAL_50G17 5', mRNA sequence [DN928673]	A_87_P009723	GGGGCTCCCCCTCCCTCGGCCTTCAGATTTTTTCCTTTCGACATTTCTATTTTTCAAGTA	up	1.99928	0.0818073	up	1.28326	0.45557
SS2	Gallus gallus [Pro2]-somatostatin precursor, mRNA, complete cds. [AY221945]	A_87_P035241	AAGGCGCCCTGTAAAAACTTCTTCTGGAAAACCTTCACCTCCTGCTAGTGCCACCCTGTC	up	1.99733	0.253322	up	1.46294	0.522533
LOC396511	Chicken type I collagen alpha-1 (alpha1(I)) chain mRNA, partial cds. [M17607]	A_87_P009394	ACGGGCTGACGTACAACGATAAGGATGTGTGGAAACCCGAACCGTGCCAGATCTGCGTCT	up	1.98611	0.00917805	up	1.26925	0.141886
CO772524	testis_EST03621 Testis cDNA Library Gallus gallus cDNA 3', mRNA sequence [CO772524]	A_87_P019091	TAGGACTGAAGCTACTTAGGGAAGCAAGGATCTTCTTCCTCTAATACATAGGAGAAGAGG	up	1.9852	0.215029	up	1.87831	0.27377
CR523099	Gallus gallus finished cDNA, clone ChEST566g15. [CR523099]	A_87_P011839	CAAGAATTGGGACGAGAAGAGCCTTGGTCACAATGGGGCTTCCCCAGTCAGCACCAAGCA	up	1.98405	0.00248725	up	1.67427	0.0164981
PITX1	Gallus gallus paired-like homeodomain transcription factor Ptx1 mRNA, partial cds. [AF069397]	A_87_P037946	AGCAGCACTCCAGTTTCGGCTACAGCAGTTTGCAGAGCCCCGGCTCCAGCCTAAACGCCT	up	1.98343	0.0058863	up	1.46747	0.0657881
BF381518	GAR137_C10_9A DDChick1 Gallus gallus cDNA 3', mRNA sequence [BF381518]	A_87_P034996	GCTCTTGAGACATTTTTTACTTATCTTTTTGGGCAAGAGTTGGTATTCTTTCATTCAAGG	up	1.98297	0.275545	up	1.58582	0.495748
ENO2	Gallus gallus mRNA for gamma-subunit of enolase, complete cds. [AB004291]	A_87_P038221	AAAGAGGTCTGCACCCTGTCCCTTGCTTTGGGATCATAAGCATTTCTGGATTTAGGCATT	up	1.98076	0.137483	up	2.03302	0.162939
HIPK2	Gallus gallus homeodomain-interacting protein kinase 2 mRNA, partial cds. [AF461697]	A_87_P037609	GCAGGACAGAATAACGGGAACACATATGACACCAAAGGGGTTCCAGAGACTCACTGCAGT	up	1.9775	0.000852117	up	1.48368	0.00529428
AJ393408	AJ393408 dkfz426 Gallus gallus cDNA clone 15h16r1, mRNA sequence [AJ393408]	A_87_P037434	TGCCCGCACGCCCAAGGAGAAACCACTAAAGCCTGAGAAGCCCAAGAAGGAAAACGCCAA	up	1.97527	0.0397646	up	1.73415	0.141014
RYR1	G.gallus mRNA for ryanodine receptor type 1. [X95266]	A_87_P008784	CCACGGCTTCGAGACCCACACGTTGGAGGAGCACAACCTGGCGAACTCAATGTTCTTCTT	up	1.97256	0.0954351	up	1.56459	0.300063
RCJMB04_19d11	Gallus gallus mRNA for hypothetical protein, clone 19d11. [AJ851700]	A_87_P035600	TCCCCTCCTTGCCCTTCCTCTTTGTTTACCGTGTAACATACCCATGGGATTTGTTTATTA	up	1.97116	0.00382387	up	1.44945	0.276271
LOC420074	Gallus gallus finished cDNA, clone ChEST37m16. [CR352713]	A_87_P018414	GGCCATGAGCTTCACGGACAAGATGGCCAATGGCCTGGCTGTGATGTTGATCCAGAACCT	up	1.96841	0.00185329	down	1.7482	0.747695
CR387856	Gallus gallus finished cDNA, clone ChEST320c4. [CR387856]	A_87_P015527	AGTGCCTTCAAAGAACCTTCCAGGGAACACAACAAATCTTCCAAAGAATCCTCTAAGAAA	up	1.96559	0.0253884	up	1.69378	0.101229
BX930704	Gallus gallus finished cDNA, clone ChEST378b3. [BX930704]	A_87_P024202	TTCCAGAAGATTTTTCAATATTGATGACAGTAAAACCTAAAAAGGGTATCCAGTCCTTCC	up	1.96465	0.160971	up	1.70095	0.2675
LOC418923	Gallus gallus finished cDNA, clone ChEST1038h4. [CR523121]	A_87_P011820	AACAGTAATTTGAAGGACCTTTATGCTCTTCCCGTTGACAAACTGTCACCTTCCTCAGTC	up	1.96389	0.586447	up	1.18546	0.90707
RANGAP1	Gallus gallus mRNA for hypothetical protein, clone 19c24. [AJ720502]	A_87_P036367	CCCTTCCCTTTCCTAGCTAAATAGACTTGGTCTGGAAATGAATACAATCTGTGAAGTGCC	up	1.96269	0.145357	up	1.29365	0.236614
GRIA2	G.gallus mRNA for AMPA receptor subunit GluR2. [X89508]	A_87_P008800	CACCTAAAGGATCCTCATTAGGAACCCCAGTAAATCTTGCAGTATTGAAACTCAGTGAGC	up	1.95732	0.00828075	up	2.0471	0.0156791
ST6GALNAC1	G.gallus mRNA for GalNAc alpha-2,6-sialyltransferase. [X74946]	A_87_P008835	TTTGGAGTATTGGCCTTCTGAGTGGGCTTTTGCAAACAAAATAAACGGCACTGCTTTCCC	up	1.95478	0.00248724	up	1.43758	0.0405067
HUC	Gallus gallus RNA-binding protein HuC (HuC) mRNA, complete cds. [AF176674]	A_87_P037828	CCCCCCATCTCAGACACTTTGTACTTTGTACTTTTCATGGCACAAATGGATAAAATACGG	up	1.9517	0.00339055	up	1.81226	0.0526523
U76665	Gallus gallus paraxis mRNA, complete cds. [U76665]	A_87_P009022	GCGATCTGGACAGCAAACAACCTCGCAGCATCTGCACCTTCTGCCTCAGCAACCAGCGGA	up	1.94948	0.00346062	up	1.47265	0.00598267
LOC423943	Gallus gallus finished cDNA, clone ChEST544o15. [CR352975]	A_87_P018247	AAGGCTCTGGGGTTATTTTCCTGGATGAGGTGCAGTGCAAAGGGAATGAAGCTTATGTAT	up	1.94752	0.259872	up	1.60215	0.487923
CR353293	Gallus gallus finished cDNA, clone ChEST823g14. [CR353293]	A_87_P018033	TGCTGAGCCAGCTGCTATTTTATGCTTTTTACAACTTGACTAGAGACAGCTCTCTTGGAT	up	1.94485	0.0199303	up	1.61234	0.102304
KCNC1	Gallus gallus finished cDNA, clone ChEST126m8. [BX933945]	A_87_P022801	TATGCCGAGAGAATAGGTGCTAAACCAAATGACCCTAGTGCCAGTGAACACACACACTTT	up	1.94019	0.21984	up	1.00216	0.997207
BRD3	Gallus gallus finished cDNA, clone ChEST983j4. [BX929510]	A_87_P024693	GCAGCAGATATTCGGTTAATGTTCTCTAATTGTTACAAGTACAATCCTCCAGACCACGAA	up	1.93866	0.0118801	up	1.57757	0.0632378
LOC419671	Gallus gallus finished cDNA, clone ChEST756b21. [CR523638]	A_87_P011480	AAGCTCCAGAAAGCAGCTCGGTCTCTGCTGGAGGTGCAAGGAGAGCCAGCCCCTGACCAT	up	1.93736	0.0331654	up	1.2742	0.396456
MMP9	Gallus gallus 75 kDa gelatinase mRNA, complete cds. [AF222690]	A_87_P037769	CAGCTTTGCTGCCCGGAGACGTTTGCCCGGCGCAAACTGCACACGGATTTGTAATGACTT	up	1.93001	0.00683608	up	1.64212	0.024926
NFASC	G.gallus mRNA for neurofascin. [X65224]	A_87_P008871	CCTGAAGACAAGAACGTAGAAGATGGCTCATTCGACTACAGGTCTCTTGAAAGCGATGAA	up	1.92869	0.136373	up	1.596	0.28352
DN830433	DT40subNB_2F12 DT40subNB Gallus gallus cDNA clone DT40subNB_2F12 12C3 5', mRNA sequence [DN830433]	A_87_P009747	GGGGGGTTTTTTGTTTCCCGGCATTTTTAAAAACTTAAATTTGGAAAGGAAGCAAACCTA	up	1.92797	0.371931	up	2.01872	0.336583
CO506966	GGEZEB2015G10.g embryo breast muscle - EB2 Gallus gallus cDNA clone GGEZEB2015G10, mRNA sequence [CO506966]	A_87_P020259	GGGGACTGACTACCTGAGCGGAGACCTGCAGTGTCACGCATTCGACAGCAGCAACGTGGA	up	1.92786	0.00666597	up	1.41994	0.0922187
BX930590	Gallus gallus finished cDNA, clone ChEST968o22. [BX930590]	A_87_P024239	ATCATTATGTTGCAAACAAGCCAAGAAATCGTGGAGAGCCCATACACAGTGTTAAAATGG	up	1.92517	0.208282	up	1.75498	0.293588
ATP2A1	Chicken Ca2+ ATPase, complete cds. [M26064]	A_87_P009379	GTGGGCCCCCCTCCGCCCCCATAATGGGCGCCGCTTATTTATTGCCAATAAAGGGAACCC	up	1.92433	0.0144601	up	1.34559	0.383583
CN383641	4117135 BARC_3GAL chicken mixed tissue Gallus gallus cDNA clone 3GAL_9E12 5', mRNA sequence [CN383641]	A_87_P020408	GTTTGCATGTATTTGCTTGTACATATTCCCTTTATTGATACTGCTTGCAGGAGTTTCAGT	up	1.92163	0.23435	up	1.23068	0.70053
CN383178	4117365 BARC_3GAL chicken mixed tissue Gallus gallus cDNA clone 3GAL_6K15 5', mRNA sequence [CN383178]	A_87_P020413	TCATTTTGCTGGAGAGTTTTTTATATACTGTAGCCTTATTTCATATTGTATTTTAAACCA	up	1.92128	0.00460779	up	1.50045	0.0208148
CR391653	Gallus gallus finished cDNA, clone ChEST415g11. [CR391653]	A_87_P013310	ATTGGGTTGTTTGTGTTGGCCTCTAAAAGCAGTGTTTGCTTAGTGGAAGGGTGACACGTT	up	1.91814	0.0361864	up	1.10297	0.756103
EGLN3	Gallus gallus finished cDNA, clone ChEST247d17. [BX935456]	A_87_P022137	CTGTCGTGCCTGCATCTGGCAGAAGGAACCTTTGTTTTCTATTTGCCTTTTGCTGGAAAA	up	1.9157	0.00356627	up	1.59068	0.0348359
LOC419186	Gallus gallus finished cDNA, clone ChEST774j10. [CR387216]	A_87_P015970	ATTTTCTATCTATGCATGGGATGCATATGGCATATTTTATTAAAGATGGAAGTGACCCAC	up	1.91262	0.0248956	up	1.41559	0.228954
TC186494	Q08514 (Q08514) Gallus gallus POL-like (Fragment), partial (8%) [TC186494]	A_87_P008307	GCCTGCTAACTGTGTCCCATGCCACTGATATCCATTACCTCAAACCAATATGTTCTGAAG	up	1.91204	0.238215	down	1.08867	0.827553
LRP12	Gallus gallus finished cDNA, clone ChEST725l18. [CR406808]	A_87_P012516	TAAGAGTGCATTTTTGTGCTGACAAAGTGAATGCTGCACGAGGTTTCAATGCCACCTATC	up	1.90983	0.0263552	up	1.7811	0.0382299
ETNK1	Gallus gallus finished cDNA, clone ChEST553h5. [CR385222]	A_87_P017266	AACAACTTGTTTTATTGAGCTGCATTAACTTATATTAGGGATCTACACAGTCAGAGGATG	up	1.90742	0.104788	up	1.7728	0.199663
AJ456025	AJ456025 riken1 Gallus gallus cDNA clone 7f17r1, mRNA sequence [AJ456025]	A_87_P037268	GGGGGAATGGGGACGCCTTTTTTCTTCGAATGCCCGGGTGCGGAAATTACTGCACTGGAC	up	1.90621	0.494617	up	1.29049	0.675031
GATA5	Gallus gallus GATA-5 transcription factor (GATA-5) mRNA, complete cds. [U11888]	A_87_P009149	CCAGAAGAGGCTGTCTTCATCGAGACGTGCTGGCCTATGTTGCACTAACTGCCACACAAC	up	1.90566	0.0301467	up	1.70402	0.0973145
PRNP	Gallus gallus prion-like protein mRNA, complete cds. [M61145]	A_87_P009320	TTGGCCATACCCAACCGTCCTAAACGATTTTCACGTCGCTGTAACTTAAGTGGAGATACA	up	1.90536	0.000891615	up	1.52202	0.00314655
LOC429929	Gallus gallus growth arrest and DNA-damage-inducible protein 45 gamma (gadd45) mRNA, complete cds. [DQ358722]	A_87_P009666	GCCGGAACATCAATGAGTGGGTGCCAACTATTGCCTTACCTGAGTGACCATGACCTGGCA	up	1.90478	0.00190374	up	1.79861	0.0056143
DACH1	Gallus gallus dachshund 1 (Dach1) mRNA, partial cds. [AF427472]	A_87_P037622	CTGAAGATACCTGTGCTACGGTAAAGAACTTTGCAGTAAGACATTCACCCAAATGGAGTT	up	1.90127	0.0315954	up	1.60264	0.110961
CR386529	Gallus gallus finished cDNA, clone ChEST335f22. [CR386529]	A_87_P016416	AGCAAAGACAGCACCTACGATACGTATGTGGGCACTGGCTGGCTGATCAAGGGCATGGAC	up	1.89916	0.113958	up	1.63864	0.266155
PBX1	Gallus gallus PBX1B mRNA, complete cds. [AB043620]	A_87_P038158	TAAATTTCAAGAGGAAGCCAATATTTATGCTGCCAAAACGGCTGTCACGGCTACCAATGT	up	1.89915	0.0529575	up	1.51693	0.190931
TP73L	Gallus gallus dNp63a mRNA for DN p63 alpha, complete cds. [AB045224]	A_87_P038156	ATGAAATGCTACTGAAGATCAAAGAGTCCCTGGAACCTATGCAGTACCTTCCCCAGCACA	up	1.898	0.298572	up	1.5043	0.569419
PDGFB	Gallus gallus PDGF-B mRNA for platelet-derived growth factor B chain, complete cds. [AB031025]	A_87_P038173	ATCAGTGGACCTTCTCCTACCGAAGCCTCTCCCTTCTTTCATTTATTAACATCTTAAAGT	up	1.89195	0.000993782	up	1.83886	0.00195734
LOC428220	Gallus gallus finished cDNA, clone ChEST43j7. [BX933463]	A_87_P023018	GAGATCAAGAAACCTGGTGGCAGCGAGACAGGATTTCGACTGAATTTATTCACGACAGAT	up	1.8903	0.286509	up	1.59439	0.468443
CR353981	Gallus gallus finished cDNA, clone ChEST9i8. [CR353981]	A_87_P017615	ACAGCAGAAGCAGAGTAGTTAAAGTTACTGCACAAGCAAATACGTCAAAAGCGCAGTTAA	up	1.88947	0.149758	up	1.34089	0.555233
AY458225	Gallus gallus unknown mRNA, 3' UTR. [AY458225]	A_87_P035161	GTGAAGCGTTCTTATGTCTGTATTATCTTTCCCTGCTTTCATTGCCTTGTAGAATGGACC	up	1.88754	0.312344	up	1.48026	0.593972
SCX	Gallus gallus bHLH transcription factor scleraxis mRNA, complete cds. [AF505881]	A_87_P037582	ATGCTGGTGTTTCATGTCATTGATACGATAATATAAAGCCTGAGCAGTTCGTATAATTAA	up	1.8861	0.00764124	up	1.63073	0.0404471
DN830625	DT40subNB_8B9 DT40subNB Gallus gallus cDNA clone DT40subNB_8B9 5', mRNA sequence [DN830625]	A_87_P009740	TTTTTTCGGCCAAAATGGAACCCGGCCCTTTGGGACCCCAAACCATGGCCCTGGATTTTT	up	1.88555	0.161717	up	1.62675	0.257963
RCJMB04_5p1	Gallus gallus mRNA for hypothetical protein, clone 5p1. [AJ851542]	A_87_P035699	CTAGATCATACCTCAGGTAACATCAGGTAATGATTCCTACAAAACACAAACGAAACTTTT	up	1.88426	0.0706494	up	1.37083	0.38507
MYT1	Gallus gallus finished cDNA, clone ChEST672b12. [BX950844]	A_87_P021417	AAGGCAGAAGGAAGGATCCCTCAATGGCTCCTCATTTTCCTGGAAATCACTGAAAAACGA	up	1.88276	0.376793	up	1.97727	0.390861
ZPBP2	Gallus gallus zona pellucida binding protein 2 (ZPBP2) mRNA, complete cds. [AY575015]	A_87_P035126	AGTGGCTGAGAGCTCCTCCGCTCACGCACCCCTCCTGCATTTCATGTGTTCAGGCATAAA	up	1.88259	0.00731265	up	1.41489	0.306086
MYH7B	Gallus gallus myosin heavy chain mRNA for myosin heavy chain, complete cds. [AB057661]	A_87_P038135	GAAGAAGATGGCTGAAGCCCAGAAAGGCATTCGCAAGTATGAGCGGCGGATTAAGGAGCT	up	1.88227	0.226219	up	1.55317	0.412567
BX933941	Gallus gallus finished cDNA, clone ChEST128f19. [BX933941]	A_87_P022804	AGTCGTCCGTCACCAGCAGCAGCGATACGCCCGTGGACTTCTTTTTTGAGTTCTGCGACT	up	1.8812	0.0029565	up	1.70749	0.00855511
RCJMB04_16a12	Gallus gallus mRNA for hypothetical protein, clone 16a12. [AJ851666]	A_87_P035623	ACCTCCAGAGTTTCAACATATAGCACATAATATTCCTGACTAAGCTTTTTAAATAGGGTC	up	1.88	0.224489	up	1.56171	0.405401
GDF3	Gallus gallus growth factor CVg1 (cVg1) mRNA, complete cds. [U55871]	A_87_P009057	CCACAGAGCCCCTGTGCCGGCATCGACTCTTTCCTGGATACCTCTCTCCTGGTGGTGACT	up	1.87933	0.132233	up	1.32487	0.305529
FGF7	Gallus gallus finished cDNA, clone ChEST984o1. [BX929277]	A_87_P024790	TGGACACACAAAGGAAAAGAGATGTTTGTTACACTAAACCACAAAGGTGTTCCCATGAAG	up	1.8783	0.0412619	up	1.59334	0.136977
CDERMO-1	Gallus gallus mRNA for Dermo protein, bHLH transcription factor. [AJ131110]	A_87_P037515	AAGAATCTTAATTCAGGAACACATTTATGAGAAATCTTTGGGTTCGGATCTTACTTCCTC	up	1.87555	0.0050541	up	1.45536	0.0383936
AM066156	AM066156 Chicken immune 2 - CSEQRBN29 Gallus gallus cDNA clone C0000466H04_T7, mRNA sequence [AM066156]	A_87_P035387	TGGAGTGGTGCAGCGAGCGAGCAATGATGTCCAAAAAGTGGTGGTGGGCACACACGTCTT	up	1.87517	0.00585617	up	1.69505	0.019037
AY531258	Gallus gallus Tva long isoform (tva) mRNA, tva-s allele, complete cds; alternatively spliced. [AY531258]	A_87_P035147	AGCAGGTCTGACATCTTCGGTCTCGAAAGCGTATCCAGGGAGCAGTTGGTGCCTGACAAG	up	1.87447	0.211994	up	1.99915	0.202368
SYNE2	Gallus gallus finished cDNA, clone ChEST175h13. [CR389006]	A_87_P015089	ATTGCAACAGGATCTCGGTGATCTACAGTGTAGTGAATTGAAAATGGAAGAAGAACTAAC	up	1.87394	0.0276669	up	1.34838	0.271601
MAML3	Gallus gallus finished cDNA, clone ChEST699e4. [BX931050]	A_87_P024092	TCTGGAGTTTGGGTTGTTAACGTTTGAAAAAATCAAAGAGAGGGTTGGATGTGCTCCCCA	up	1.87311	0.0940099	up	1.58389	0.222818
TMEM56	Gallus gallus finished cDNA, clone ChEST561m19. [BX934812]	A_87_P022399	GCAGCTCTGTATGCTTATTATTTTGTACTGAGCAAAGGTCTGCTGGCTTATTTTGGGAAC	up	1.87295	0.561453	up	1.75392	0.666526
RCJMB04_11n1	Gallus gallus mRNA for hypothetical protein, clone 11n1. [AJ720161]	A_87_P036597	GGACCTCTGAGCCTCGAGTTTGTTCCTTTACGCTTGATCCCAATAAAAGCGTGCTCTGGC	up	1.87289	0.339675	up	1.67628	0.466475
NFIC	G.gallus mRNA for nuclear factor I-C4. [X68157]	A_87_P008858	GACAGCGTGCATTTACCACCACCTCCACCACCTCCATCGTGACGACGACGACGACGACGA	up	1.86974	0.00156021	up	1.38668	0.0512646
RCJMB04_20o15	Gallus gallus mRNA for hypothetical protein, clone 20o15. [AJ851715]	A_87_P035591	GGGGGCGGGGGGAAGACCTGTACAACTGTATTTGAAGACCATGCAAGAAATAGAATAAAA	up	1.86918	0.105907	up	1.0712	0.853954
RCJMB04_25f22	Gallus gallus mRNA for hypothetical protein, clone 25f22. [AJ720777]	A_87_P036183	TGGTTTTGTTTGTGCAACTGAATTCCAAGCAAGTGCATACACAGACCTGTATTACCTTGC	up	1.86854	0.00213099	up	1.28716	0.170523
RCJMB04_5f14	Chicken (clones pCMA-1 and pCMA-8) depolymerizing factor (ADF) mRNA, complete cds. [M55660]	A_87_P009337	GGTTGATTAAAGCTGTTTCCTTTGTGTAATGTGTACATGGAAGTTGCATAGAGTTTTCCT	up	1.8677	0.0263169	up	1.35185	0.285158
CR406827	Gallus gallus finished cDNA, clone ChEST732h11. [CR406827]	A_87_P012499	GCTACAGGATCCCAACAAAACACCCAGGTTTTACCCTGTCGTTAAAGAAGCACAATCCAT	up	1.86764	0.0126469	up	1.523	0.0507662
RCJMB04_2g17	Gallus gallus mRNA for hypothetical protein, clone 2g17. [AJ719443]	A_87_P037089	GAAAGCTTGAGGAATTACTACCAGCAATGGGGAAAGCTTACAGATTGCGTGGTAATGCGG	up	1.86581	0.503045	up	2.09663	0.468017
CO770039	testis_EST01136 Testis cDNA Library Gallus gallus cDNA 3', mRNA sequence [CO770039]	A_87_P019333	TTGCATGGAAATCTGGATGATCTTTTACTGGTATTCCACAAGACGGGGCTGCCTTCAGAA	up	1.86574	0.32029	up	1.64446	0.465799
CD216184	pgp2n.pk010.d4 Normalized chicken pituitary [CD216184]	A_87_P021374	GGTCAGGAGAAAGGAACAAGTAGGAAGAGGGTGAAAACGCACGATCCACTGGACCTTCCC	up	1.86405	0.117307	up	1.14345	0.288988
LOC423497	Gallus gallus finished cDNA, clone ChEST704d2. [CR385844]	A_87_P016886	TGAAAATAACTAAAGATGACAAGAAGGCACCAGAAGTTGATACTCACTTCCCAACGGGTG	up	1.85892	0.240842	up	1.47153	0.481754
IL15	Gallus gallus interleukin-15 precursor, mRNA, complete cds. [AF152927]	A_87_P037851	ACGGAACATATGGAAAAATGGAAATGCAAGATTTGCAACTTACCAGTTGAATTCCACAAC	up	1.85829	0.275262	up	1.40053	0.595458
LOC424534	Gallus gallus finished cDNA, clone ChEST727a12. [BX934727]	A_87_P022454	TGTGCCGCCGGAGCCACTGACACGTTCCAGTTCCTCAAACAAAAAATTCATGATAAGAAT	up	1.85777	0.0576763	up	1.4416	0.229641
HOXB5	Gallus gallus Hoxb-5 mRNA for Hoxb-5, partial cds. [AB193110]	A_87_P038057	ATTCCACTTCAATAGATATCTCACCCGCAGGAGGAGAATAGAGATCGCTCACGCTCTGTG	up	1.85771	0.13702	up	1.83341	0.167409
SH3TC1	Gallus gallus finished cDNA, clone ChEST687k11. [CR405910]	A_87_P013120	TACTGGCAAAACACTACACTGCACGCAAACAACATGAAGAGGCACTTCCCTTCCTAGAAA	up	1.85743	0.415144	up	1.34753	0.724748
BX930078	Gallus gallus finished cDNA, clone ChEST593b16. [BX930078]	A_87_P024448	TATTATGGATGAAGACCAGTCCAAATTGGCAGGCCTTCTTGACCTTAACAATGCCATACT	up	1.85552	0.285664	up	2.05751	0.269332
THPO	Gallus gallus thrombopoietin (Tpo) mRNA, complete cds. [AY613434]	A_87_P035111	CCACAAGCCTTTGGCTATCACATAGCTCAGAGTGGCCAAAAGCAGCCATACCTGTGCAAG	up	1.85549	0.238003	up	1.76333	0.29748
VAX1	Gallus gallus Vax mRNA for homeodomain protein, complete cds. [AB032248]	A_87_P038172	CTGAGCTCGTCCGCCTTCGAGCCCTACTCCCGGACCAACAATAAAGAAAGCGCTGAGAAA	up	1.85528	0.522079	up	1.56487	0.485722
AW773314	EST00220 DT40subNB Gallus gallus cDNA clone 4H10, mRNA sequence [AW773314]	A_87_P035314	GGTTTGAGGGATTGGAGGGGAAATTTTGAGTTCTCATTGCTCTGTTGGCCAAATGTTGCT	up	1.85484	0.579093	up	1.46527	0.799821
RCJMB04_24j16	Gallus gallus mRNA for hypothetical protein, clone 24j16. [AJ720745]	A_87_P036210	AATCACCGAAGCGGTATTCAGTAGCCTTGTGAAGGGTCATGCAAGATCAGGAGATATCAA	up	1.8534	0.0480642	up	1.65092	0.17097
AM063104	AM063104 Chicken immune 2 - CSEQRBN29 Gallus gallus cDNA clone BET603945372_R1_M13F, mRNA sequence [AM063104]	A_87_P035425	CAAGACGACGGGCTTCTGTGGAATGAGGTAGCGGTCTCTGAAGTGCTCCAGCGAGGGGCA	up	1.85146	0.446141	up	1.71693	0.551974
EFHA1	Gallus gallus finished cDNA, clone ChEST790k4. [BX929803]	A_87_P024581	CTGGAGATGAAACCGTATTTCAGGAAGCAGAATTGGAAAGCTGTGATGTTAATACCATGC	up	1.85098	0.0201489	up	1.3917	0.0841211
RCJMB04_8p18	Gallus gallus mRNA for hypothetical protein, clone 8p18. [AJ719973]	A_87_P036729	ACAAGCTGTCACTCTGATGATGGATGCCACAAACATGCAGTCTGTCAAAGCCATCATGTA	up	1.85048	0.0326542	up	1.55486	0.0615289
AJ443894	AJ443894 dkfz426 Gallus gallus cDNA clone 38j18r1, mRNA sequence [AJ443894]	A_87_P037358	TTTTTTCTTGTTCACTCATGTCTCCATATGTCTGCTGAAAGTTCCTCTTGAAAAATAGCT	up	1.85001	0.015007	up	1.25769	0.232669
IL17A	Gallus gallus interleukin 17 mRNA, complete cds. [AY920750]	A_87_P035017	AGAAGAAAATGATCACCGTGGGCTGCACGTGTGTCACCCCACTGATCCAGCACCAGGCTT	up	1.84863	0.0950931	up	1.23331	0.470433
CO767798	spleen_EST03524 Spleen cDNA Library Gallus gallus cDNA 3', mRNA sequence [CO767798]	A_87_P019545	TGAAGAAATGCTGTCCGCAGTGAAGACCTGAGTGCAGAAGCAATGAGGTATCCAATTTCT	up	1.84621	0.109109	up	1.47604	0.296516
CNTNAP5	Gallus gallus finished cDNA, clone ChEST544h7. [CR352992]	A_87_P018233	TGACATATGGAGGATTATCATGTGTTGAGGTTAAACACTGTTGCCACTGAGGCAAATAAA	up	1.84479	0.312039	up	1.16265	0.83314
TCF3	Gallus gallus HMG-box transcription factor Tcf-3 (TCF3) mRNA, partial cds. [AF454503]	A_87_P037615	TTTGGGAAGCAGACTCCGGAGGAAGAGGCGCTTTCCCTTTACCAGCAGTCGACCTAAAGA	up	1.84474	0.00361001	up	1.45229	0.0135681
RCJMB04_13p14	Gallus gallus mRNA for hypothetical protein, clone 13p14. [AJ720276]	A_87_P036515	GAGAAAGTGGGGATTCAAGCTTTTCAAATTCCTAAATCTTGACCTCCGAGAATGATTTGA	up	1.84161	0.385458	up	1.75524	0.474551
LOC418149	Gallus gallus finished cDNA, clone ChEST7k21. [BX950346]	A_87_P021675	TTGGACCAGATCAGGATCTTGCAATTCTAAATGAGGTTCGTCAAGGAAACAGACTAACCC	up	1.84099	0.154095	up	1.68488	0.119891
CN606337	EST00011 Black-bone Chicken's Liver Differential Express Library Gallus gallus cDNA 5', mRNA sequence [CN606337]	A_87_P020384	AACAGCTCCCTTCCTCTTCAACTGAAATATAGCATACACTAACGTGTAAATATTTCTAAG	up	1.84096	0.543091	up	2.08299	0.459705
TMPO	Gallus gallus mRNA for hypothetical protein, clone 1i19. [AJ719348]	A_87_P037151	GTATGCTCCAAAATACAGTACCTCAAAGTGACATCAAGTCTGAGAAACCTTCAACAAAAA	up	1.83989	0.0603628	up	1.76196	0.0906468
MYST3	Gallus gallus finished cDNA, clone ChEST592p6. [BX930321]	A_87_P024358	GTGCAAAACCTGCAGTTCTTGTCGAGACCAGGGCAAAAATGCTGATAACATGCTATTCTG	up	1.8372	0.0491903	up	1.5245	0.0808421
TOP2B	Gallus gallus mRNA for DNA topoisomeraseII_beta, complete cds. [AB007446]	A_87_P038212	GGAACTGAAAAAACTCCAGCATTAATTTCTGACTACAAGGAATACCACACTGATACAACT	up	1.83675	0.185346	up	1.9172	0.221504
LOC396152	G.gallus runB mRNA for ch-runtB2. [Z36530]	A_87_P008696	TAACGAGTTTACTGCATCTTATGGACGTGTTAACTATAAGGAAGTATAGGAAGATTCCCA	up	1.83463	0.014252	up	1.59416	0.120945
FASN	Gallus gallus White Leghorn fatty acid synthase (FAS) mRNA, complete cds. [J04485]	A_87_P009541	TATCAGTCCACATCATTGAAGGAGATCACCGCACCTTATTGGAGGGAGATGGTGTTGAAT	up	1.83403	0.125501	up	1.54575	0.300645
BMPR2	G.gallus mRNA for bone morphogenetic protein receptor type II, partial. [Y11870]	A_87_P008740	AGATATGTATGCACTAGGCCTCATCTACTGGGAGATATTTATGCGATGTACAGACCTCTT	up	1.83361	0.0320788	up	1.49189	0.217919
2210018M11RIK	Gallus gallus finished cDNA, clone ChEST90k14. [BX934563]	A_87_P022538	ACCCTTGAAGCATCAGTGTGTTTTAACAAGACAGTATTGCAAAAGCTGCATCTTAGAAAT	up	1.83324	0.00181805	up	1.44809	0.0181634
HK1	Gallus gallus mRNA for hypothetical protein, clone 18g2. [AJ851693]	A_87_P035605	AGAGAGTCTTTTTACTTTGCACACTAGTAGCTCCAGTACTAGTGTTACGTGGTATTTGTG	up	1.83068	0.000188272	up	1.72396	0.00312949
ASH1L	Gallus gallus finished cDNA, clone ChEST754h4. [CR388954]	A_87_P015121	ACACCACGTATTTCTGGTACGAAACTGGGAAAAGATTCGACAGAAGCAAGAGGAAGTGAA	up	1.82671	0.014817	up	1.57011	0.0870425
CPA2	Gallus gallus finished cDNA, clone ChEST951j22. [BX936256]	A_87_P021751	TCAAGAGCAGCAAGCTCAGAAATCCTCTTCCTTTGGCGTGCTCAAGAAAGCTGTAATCAT	up	1.82658	0.42371	down	1.26718	0.828258
PNN	Gallus gallus finished cDNA, clone ChEST186d14. [BX929343]	A_87_P024760	TGCAATCTTTGAAAGCAGGCGCCATGAATTTGCAGAGCAGATAAACAAAATGGAGGCCAG	up	1.82638	0.0199695	up	1.49267	0.0659204
LOC416474	Gallus gallus finished cDNA, clone ChEST482m13. [CR389729]	A_87_P014628	CTGACCTCTCCCCACGAGTTGTTGCTGCCACAGAGAAACTGGAACTCCCCCAGGAATAAA	up	1.82597	0.228921	up	1.24115	0.197905
RBP4	G.gallus retinol-binding protein mRNA. [X77960]	A_87_P008828	ACCGTGTAACAGTACCATGGATGTAAAGTTAATACATTGATCAGGTGCTCTTTTAAAAAG	up	1.82526	0.197247	up	1.45939	0.437653
LOC415543	Gallus gallus finished cDNA, clone ChEST288g18. [BX936129]	A_87_P021792	TAGTATGTGGGGTTCAGCTGTGTATCTGTGTTACAAAAAGTCCGTGGCAAAAACTAACAC	up	1.8234	0.187781	up	1.63971	0.272807
CN223691	RJA096C12.ab1 RJbrain Gallus gallus cDNA 5', mRNA sequence [CN223691]	A_87_P020791	TGCCCACGTGGAGGCGGAGCCGCTTTGCGTCCTGGATTTCTACATCCACGAATCCCTGCA	up	1.82007	0.288848	up	1.55711	0.541003
BG710598	pgl1n.pk004.f5 Normalized Liver Library Gallus gallus cDNA clone pgl1n.pk004.f5 5' similar to dbj [BG710598]	A_87_P034965	AGCTGAATACTTTTTTGACTCAAAAGTGCTGACGGATGGAGAATTGGCACCCAATGACAG	up	1.81999	0.0160446	up	1.16974	0.483165
CR352789	Gallus gallus finished cDNA, clone ChEST429j8. [CR352789]	A_87_P018366	TCCTTGACTACAAGCCAGAATCTTCTTCAGAACTTGAAGGATGAGGTAGCTAAAATAAGA	up	1.81967	0.00818268	up	1.19579	0.38759
RHCG	Gallus gallus Rh type C glycoprotein mRNA, complete cds. [AY227357]	A_87_P035233	ATAAAGCCTGGTGGGGAAAGCGTGGTGGGGGAAAACACCTGCTTCCCACTGGCTCACTTT	up	1.81917	0.606842	up	1.43258	0.729101
SMAD6	Gallus gallus inhibitory protein SMAD6 (SMAD6) mRNA, complete cds. [AF165889]	A_87_P037839	CAGCCTCTGACGAAAGGAAAACAAAACAGAAAGACACAGACTATCCCAAATATCATCTAC	up	1.81884	0.000952925	up	1.52409	0.00447043
BX931474	Gallus gallus finished cDNA, clone ChEST646p20. [BX931474]	A_87_P023916	CTCCCCCTCCAGCATTAATGAGGACAGTCTGAGTACTGCAAGTGAGCTGCTGTCTACACG	up	1.81831	0.0119623	up	1.57374	0.0818126
CHRM4	Gallus gallus cholinergic receptor, muscarinic 4 (CHRM4), mRNA [NM_001031191]	A_87_P009241	AGACCTGCGTTCCTGAAACCGTGTGGTCCATCGGCTACTGGCTCTGCTATGTCAACAGCA	up	1.81496	0.186625	up	1.27115	0.499561
LOC418914	Gallus gallus finished cDNA, clone ChEST44l18. [BX933581]	A_87_P022957	AGGAAAAAGGTACAGAACTGTGCCAGAATTACAGAGGAATATTTCAGAATAAAACTGCTG	up	1.8125	0.46463	up	1.83486	0.499713
BX931471	Gallus gallus finished cDNA, clone ChEST649f9. [BX931471]	A_87_P023917	TCTGTGCTGCTCAGATCTCCCAGGTGCTTCCAGGAAGAGCAGCAGTTCTACAATGTCCCA	up	1.81241	0.493682	up	1.67287	0.619012
XYLT2	Gallus gallus xylosyltransferase II (XYLT2) mRNA, complete cds. [AY619010]	A_87_P035108	CTGGGACTTCTTCATCAACTTGAGTGCCACCGATTACCCCACGAGGACCAACGAGGAGCT	up	1.81208	0.409749	up	1.33383	0.601588
RAMP1	Gallus gallus finished cDNA, clone ChEST485f1. [BX936098]	A_87_P021803	GTGGCACTGATGGCCTCGGAAGTGCCCCATGGCCACTGAACAATGGGAATTAGGTGCTTT	up	1.81183	0.0135378	up	1.79321	0.0742763
BG709695	pgl1n.pk001.b12 Normalized Liver Library Gallus gallus cDNA clone pgl1n.pk001.b12 5' similar to no significant hits (pLog(P) 4)G, mRNA sequence [BG709695]	A_87_P034970	CAGCGTTGCCACCAGATCAAAGCCAAGGCAAGGCGAGTCACTCCCCCTGGTGATGGGGAT	up	1.8118	0.302347	up	2.15963	0.325831
PPARG	Gallus gallus peroxisome proliferator-activated receptor gamma mRNA, complete cds. [AF163811]	A_87_P037841	CATTTATGGGCACTCAAAAACTTGACTCCATTTCAAGCATTAATTGAGGAATATACACTG	up	1.81156	0.271006	up	1.49486	0.48029
EYA4	Gallus gallus mRNA for Eya4 protein. [AJ008004]	A_87_P037526	CTAAAATAGGCAAAGAGAGCTGTTTTGAGCGTATAGTGTCCAGATTTGGCACTAACATAA	up	1.81114	0.135384	up	1.63467	0.227822
LOC419289	Gallus gallus partial mRNA for Ovocalyxin-36 precursor (OCX36 gene). [AJ968387]	A_87_P035508	TGACTGCTTCTGCATTCTTGGTGCTGTAAAGATCAAGCTGATCTCTGGCTTACTGTCCCT	up	1.81079	0.372777	up	2.15272	0.0710536
BX931099	Gallus gallus finished cDNA, clone ChEST207p19. [BX931099]	A_87_P024064	TTTGCAAATTGATGAAGATGATAGACCAGAGCTGGTGTGGTGGAAATGCAAGAAATGGGC	up	1.80982	0.190333	up	1.54056	0.34309
NFIA	G.gallus mRNA for nuclear factor I-A6. [X68156]	A_87_P008859	AGGAGGTCTTTACCTAGCACATCCTCTACCAGCTCTACAAAACGTATCAAATCTGTGGAG	up	1.80892	0.00708972	up	1.73012	0.0196786
CR352364	Gallus gallus finished cDNA, clone ChEST536o20. [CR352364]	A_87_P018641	GTGGTGGAAGGTCTCCAGGTTCAAATTCTGAAGCTGCTGCTGAACAACAAGGACAGAGGA	up	1.80756	0.0280429	up	1.95831	0.040448
RCJMB04_4m5	Gallus gallus mRNA for hypothetical protein, clone 4m5. [AJ851525]	A_87_P035712	TTACCTCGGTGTCAAAATACCTTTCCGGAGGGAGGAAAGGAGCCCTGCATGGAGCAACCC	up	1.80713	0.0330745	up	1.26749	0.265771
SIM1	Gallus gallus single-minded homolog (sim1) mRNA, partial cds. [U40058]	A_87_P009082	AGCCGCACCAGCCAGCTGGATAACGTCGGACGGGAGCTGGGATCGCATCTTTTGCAGGTA	up	1.8064	0.114429	up	1.61741	0.164403
SH3PXD2A	Gallus gallus finished cDNA, clone ChEST385f9. [BX934682]	A_87_P022477	AGAAGGAAATCAGTTTGCCTATTCTTTGCAATGACTCGAATGGTAATGCCATGATGACAC	up	1.80599	0.0214631	up	1.5814	0.0624437
RCJMB04_28f9	Gallus gallus mRNA for hypothetical protein, clone 28f9. [AJ720866]	A_87_P036118	GTCTGTGCTGATCTGTAAAATAGCATTCAAAGGACTTTTTATGTCACTGCGAGGTATTAA	up	1.80404	0.000997803	up	1.47124	0.0155595
LOC424321	Gallus gallus finished cDNA, clone ChEST206g4. [BX931128]	A_87_P024046	CTACAAAACAAAGTGCACAGCTCCTTAAAGCCTCAGCTGAACACAGAGGAGTTTCTGAAA	up	1.80306	0.0666211	up	1.30096	0.312924
BU255099	603743876F1 CSEQCHN38 Gallus gallus cDNA clone ChEST645h20 5', mRNA sequence [BU255099]	A_87_P031542	ACGTGGGTTTTAAGAAGACTGCGCTACTTTGAATGGATAAACATAAACTGCTCCACGTTT	up	1.80144	0.00348384	up	1.55612	0.00638811
AJ454210	AJ454210 riken1 Gallus gallus cDNA clone 38c19r1, mRNA sequence [AJ454210]	A_87_P037288	CATGGAAAGGAACCCAACGCAGTTCCAGCTGCCGAATGAATTGACCTGCACCACAGCACT	up	1.8004	0.0496164	up	1.4213	0.212976
ACZ	Gallus gallus mRNA for partial aczonin, XL spliced variant (acz gene). [Y19187]	A_87_P008713	GAGGGCTCCGTGTTGATGGACTCTTTGTGAAGAGAGTAACTGTGAAGGAAATAATGAAGC	up	1.79638	0.0857617	up	1.74838	0.108268
LOC426586	Gallus gallus finished cDNA, clone ChEST716k11. [CR389769]	A_87_P014604	GGTCCCCTCTGTGGTGGATGATGGAAGCACCCTCCTCCACGCCAGAGAGACCCTGACAAA	up	1.79631	0.140688	up	1.29411	0.363177
BM439416	pgr1c.pk001.d10 Primary Chicken Reproductive Tract cDNA Library (pgr1c) Gallus gallus cDNA clone pgr1c.pk001.d10 5' similar to gb [BM439416]	A_87_P034873	ACCAATCCCAATACGATGGAGAAGAGGAGAGTGAAAGTGTACCTGCCCCAAATGAAGATT	up	1.79619	0.32029	down	1.36249	0.780162
LOC418455	Gallus gallus mRNA for hypothetical protein, clone 4b16. [AJ851508]	A_87_P035725	GGAAGCTCGGGACACACTACCAAATCATTAAGAACAAGTTGTACCGTGAACATGACTGCA	up	1.79609	0.220071	up	1.69105	0.287267
BX933040	Gallus gallus finished cDNA, clone ChEST35a8. [BX933040]	A_87_P023231	GAAGAAAACAACAAAAGGAATATCTCCATGCATAACACAGTTGGAGGAGCAATGGCGGGA	up	1.79411	0.0330688	up	1.87941	0.0348359
LOC421052	Gallus gallus finished cDNA, clone ChEST66a8. [CR385783]	A_87_P016925	TTGTGCAATATGCTGTTGTACGTCACTGACTTTCAAGCTACAAGTAATGGGACGGTGACT	up	1.79289	0.00851756	up	1.58304	0.0491467
BX930515	Gallus gallus finished cDNA, clone ChEST595j10. [BX930515]	A_87_P024268	GTATTGATGCTAGTGAAAGAGTGTAAGCAGTTATCTGGACGAATTGTAGAGGAAGCCCAG	up	1.79268	0.0456562	up	1.21406	0.431883
DIO3	G.gallus mRNA for iodothyronine deiodinase type III, partial. [Y11273]	A_87_P008743	TTCTCTAATGCCAGGAAATCGTGTCTGATGTTGTCAAGTACTAGAACTGCCAATAGCCAG	up	1.79196	0.00864153	up	1.73306	0.0265036
BAZ2B	Gallus gallus extracellular matrix protein F22 mRNA, complete cds. [AF224275]	A_87_P037768	TGAAGAGCCCCTTAAGTACCACCATTCAGATCAAACTGGATAATGTGGGCACAGTTACTG	up	1.79139	0.00147331	up	1.52236	0.0310615
FZ-8	Gallus gallus FZ-8 mRNA for frizzled-8, partial cds. [AB029453]	A_87_P038176	CCACCATTGTCATCGCCTGCTACATCTATGAGCAGCACAACCGGGAGGCGTGGGAGCAGG	up	1.78999	0.283009	up	1.29254	0.67258
CR387174	Gallus gallus finished cDNA, clone ChEST788k16. [CR387174]	A_87_P015999	CTACAGAATTCAGGCAGATGTTTACGAAACTCTGAAGGACAGATACTACCCCTCATTTAT	up	1.78983	0.177218	up	1.76191	0.216286
RCJMB04_19b13	Gallus gallus mRNA for hypothetical protein, clone 19b13. [AJ851699]	A_87_P035601	AGCAGGACCACAGCTCCAGAAGAAAGATCTATGGCCCAAACCTCATCGAGGTGCCCGTCA	up	1.78884	0.162966	up	1.46694	0.389986
LOC424998	Gallus gallus finished cDNA, clone ChEST742j21. [CR390953]	A_87_P013826	GAGAAAACTTGTCCACCAAACACGTATGGCCAGAGTTGCAGCCAAGCCTGTCGCTGCCGT	up	1.78807	0.492871	up	1.93227	0.465777
HAPLN1	Chicken cartilage link protein mRNA, complete cds. [M13212]	A_87_P009406	CTTTATTTCCTTACATCTTATCTGTATCTAAATATACATCTGTTTTTTAAACTATCAATG	up	1.78764	0.13911	up	1.54003	0.211104
AJ720220	Gallus gallus mRNA for hypothetical protein, clone 12p16. [AJ720220]	A_87_P036556	ACTGGAGGACCTGGGAATAGCAGCAAACCCAAGATCACCATGACAAAAGAAACATGTGAA	up	1.78576	0.334684	up	1.71868	0.383218
DQ020143	Gallus gallus adseverin-like mRNA, complete sequence. [DQ020143]	A_87_P009707	TCTAAACAGGTCTCAGTCAAATATCAGCATGGAAACTCCTTTTTTCAGCAGCATTCCTGG	up	1.78472	0.0269441	up	1.91864	0.0322908
FBN1	Gallus gallus fibrillin-1 (FBN1) mRNA, partial cds. [U88872]	A_87_P009000	TGGACCTGGCACATGTTACAATACTGTTGGAAACTACACCTGCATCTGTCCTCCTGATTA	up	1.78443	0.0368315	up	1.28348	0.211078
CR524214	Gallus gallus finished cDNA, clone ChEST908o8. [CR524214]	A_87_P011051	GCAGTTGTGTGTATGTGATGGGATGGATGCTCTTCTGGGCTGAGACCTGTGCAACAACTG	up	1.78217	0.00185329	up	1.55806	0.016326
RASA1	Gallus gallus finished cDNA, clone ChEST231m8. [CR390329]	A_87_P014228	CGGACCAGTGAAAATATTCAGCGATTTAAAATATGTCCTACTGCAAACAATCAGTTTATG	up	1.78098	0.107222	up	1.63145	0.267656
LOC419870	Gallus gallus finished cDNA, clone ChEST794a18. [BX929688]	A_87_P024626	CAAGCAGCTGTCCTCCATGCTTGTTGTAGAGTGCAAGAAAGCCACTGCCAAAGCAGCAGA	up	1.78062	0.0242822	up	1.40394	0.161607
CR405773	Gallus gallus finished cDNA, clone ChEST881e10. [CR405773]	A_87_P013206	TTCTCAGGCTCTTCATCAAGCACAAAGTATGACCCTGACATTCTGAAGGCTGAAATCTCC	up	1.78039	0.00851756	up	1.49412	0.190316
B3GALNT2	testis_EST02502 Testis cDNA Library Gallus gallus cDNA 3', mRNA sequence [CO771405]	A_87_P019202	GCAAGCAACTCTGAAAGATTAAAGACTTACCAGGGTGAAGATGTGAGTATGGGCATCTGG	up	1.77974	0.0832201	up	1.64015	0.15317
HOXD11	Gallus gallus homeodomain-containing protein (GHox4.6) mRNA, complete cds. [M81249]	A_87_P009294	GGATGAAAGAAAAGAAACTGAACAGAGATCGACTCCAATACTTCACTGGAAATCCCTTGT	up	1.77963	0.00462764	up	1.53652	0.0215229
RCJMB04_8f10	Gallus gallus mRNA for hypothetical protein, clone 8f10. [AJ719928]	A_87_P036760	CATCTGCACAGTAAACTGTCTGTAATCCACAGAGATGTGAAGCCTTTCCAACGTGCTCAT	up	1.77888	0.13135	up	1.53819	0.254422
ZBTB7A	Gallus gallus leukemia/lymohoma related factor cLRF (LRF) mRNA, complete cds. [AF086831]	A_87_P037917	GGCAGACAACACAAAGAGAGGTGTCACAGCATCTAGTTAGTACTTCTGTCCTCCCATTTT	up	1.77789	0.00323342	up	1.43981	0.0202632
EPHB3	G.gallus Cek10 gene. [Z19061]	A_87_P008708	GAAGAGATGTTCTGCTTCTTGGATTTCTTTACACCCCGGTTTTCCCCCCTCGAGTCCTCA	up	1.77264	0.00551412	up	1.2938	0.132878
CR407442	Gallus gallus finished cDNA, clone ChEST782m18. [CR407442]	A_87_P012068	TGAAACGACAGAGTCGATACATTCACTCAACAGTTCCTGAAAATGCAGAGAAGGAAGCTC	up	1.77176	0.0244783	up	1.6648	0.0788017
EPB41L4A	Gallus gallus finished cDNA, clone ChEST1013d16. [CR386900]	A_87_P016174	ATCACGTTCTCGTTGTAACACCAGCAGTGGTAGTGAATCCGAAAATTCCAACAGAGAGCA	up	1.77144	0.0466033	up	1.60781	0.102982
NKTR	Gallus gallus finished cDNA, clone ChEST626g2. [BX930551]	A_87_P024258	TGAACCGAAGCTCCTTGATGCTACTCCAGTTCTAACTGACCAGAAACCATCAGTGTCTAA	up	1.77131	0.0469232	up	1.40668	0.166152
RGMA	Gallus gallus repulsive guidance molecule mRNA, complete cds. [AY128507]	A_87_P035269	GCTGGACAAGGAGAGATGGGATAAAGGATCCAGTGGGGAGCACGTGGATCATCCTCAGAT	up	1.77035	0.192915	up	1.7749	0.228744
PFKM	Gallus gallus pfk mRNA for 6-phosphofructokinase, complete cds. [AB061205]	A_87_P038133	TGGAGCACGTCAGGCAAAAGAGGATCTCACAGGAATCCAACATATGAGGGAGGACTCTCT	up	1.77034	0.00635873	up	1.79549	0.0235746
BOC	Gallus gallus finished cDNA, clone ChEST405p13. [CR390915]	A_87_P013853	AGATGCCATTAATGAGACCACCATCATGCTGAAGTGGATGTATATCCCAGCCAGCAACAA	up	1.76938	0.00731265	up	1.28286	0.132961
BX257393	BX257393 AGENAE Gallus gallus multi-tissues normalized library (gcag) Gallus gallus cDNA clone gcag0001c.l.21 5prim, mRNA sequence [BX257393]	A_87_P025202	ACAACTACCGGCACTACGGCTACAGGCAGCCAGTCTGCTCCGAGCGATGCCAAGGCTACA	up	1.76886	0.0877879	up	1.88238	0.129998
RCJMB04_9a21	Gallus gallus mRNA for hypothetical protein, clone 9a21. [AJ719979]	A_87_P036725	ACATATACCCGTGTTGATAGAATGATTGTCATTGTCCTTAAATATATATATATATATAAA	up	1.76822	0.00163746	up	1.37082	0.00954839
DN850319	4145810 BARC_3GAL chicken mixed tissue Gallus gallus cDNA clone 3GAL_47K15 5', mRNA sequence [DN850319]	A_87_P009739	CTTTGCGACTGTTCTGTTTGCCATCACAAAATATTCTGTAGTGCTCTGCTAGCAGTCAGT	up	1.76745	0.423253	up	1.4792	0.638415
LOC417234	Gallus gallus finished cDNA, clone ChEST470o18. [BX932119]	A_87_P023642	ATTGTCCTCATCACATGCCATTCCTCAAGGGGTCATTCCTCTCAAATCAGGGGTTATCTT	up	1.76574	0.00261333	up	1.512	0.016326
PTGS2	Chicken prostaglandin G/H synthase mRNA, complete cds. [M64990]	A_87_P009311	ACCCAACCTGCTGGGTTTGGCTGGGTTCAAGTTGCTAGTGATAAATGTGTATGTTTGAGA	up	1.76404	0.00183096	up	2.29355	6.94244e-05
WNT11	Gallus gallus mRNA for Wnt-11 protein, complete cds. [D31901]	A_87_P009787	TTCCAATGGGACCTTCATACAGGAAAACCTGACCCTAAGTTGTCTGGGCTTGATGGATTT	up	1.76354	0.0279371	up	1.44663	0.140384
CD5	Gallus gallus CD5 mRNA. [Y12011]	A_87_P008738	CACAGGGCTGTGCAAAAAGCAAAGCACGCCTGGGCGGCGCAGGAGGAGGAGTAGAAACAT	up	1.76228	0.0088615	up	1.54381	0.0757284
CR352705	Gallus gallus finished cDNA, clone ChEST37p7. [CR352705]	A_87_P018421	GTGGCTTGCTGCTTTATCATCCTGGACAAGAAGGAGATTTCATTGCAATGGATGTGGAAG	up	1.76216	0.349784	up	1.16946	0.757201
KRTAP10-9	Gallus gallus JAC (JAC) mRNA, complete cds. [AF172321]	A_87_P037834	TGTGAGCACTAATCCTGCTGTTAATTTTCCTCTCGGTGTATGGGATGCTTTCCTTCCTTG	up	1.76189	0.0266734	up	1.66275	0.0584266
BX934892	Gallus gallus finished cDNA, clone ChEST14a6. [BX934892]	A_87_P022361	GAATCTCATTTGCAAGATGCAGATACACAGATTGACAGAGAACACCAAAACTTTTATGAA	up	1.76168	0.0228407	up	1.25805	0.448612
AM068053	AM068053 Chicken immune 3 - CSEQRBN33 Gallus gallus cDNA clone C0000485C06_T7, mRNA sequence [AM068053]	A_87_P035365	CCAGCCTCAAGAAGGTCTTCTCCTTCAAGAAAAACGTGGAGGAGGAGCGTGGTGAGGCTG	up	1.75817	0.483302	up	1.03723	0.955415
RCJMB04_9g1	Gallus gallus finished cDNA, clone ChEST866k23. [CR406312]	A_87_P012863	TGGCTTGAAAATGCCAACTCGGTTAGATGGAGAGAGACCAGGACCAAACCGCAATAATTT	up	1.75805	0.10903	up	1.75827	0.129404
POMC	Gallus gallus proopiomelanocortin (adrenocorticotropin [NM_001031098]	A_87_P009245	CCAGACCCCGCTGATGACTCTGTTCAAAAACGCCATCGTCAAAAGCGCCTACAAGAAGGG	up	1.75763	0.276197	up	1.39095	0.567308
CO769967	testis_EST01064 Testis cDNA Library Gallus gallus cDNA 3', mRNA sequence [CO769967]	A_87_P019343	AGATGGCTATGCTACAGAAGAAGATTATGATGGACACTCAACAGCAGGAGATGGCAACTG	up	1.75631	0.19026	up	1.44624	0.381056
RCJMB04_31c6	Gallus gallus mRNA for hypothetical protein, clone 31c6. [AJ720958]	A_87_P036041	TTTCTGAAGGGAAAAGCACCTTTTTCTGACTACACTGTTTTGCTTGTGTGAAATCAAAAT	up	1.75615	0.0025902	up	1.35749	0.0245464
AM066083	AM066083 Chicken immune 2 - CSEQRBN29 Gallus gallus cDNA clone C0000466D15_T7, mRNA sequence [AM066083]	A_87_P035390	TTCCAACCAACCTGGGTACCCAAGTGCAGGAAGGCACCAGGGGGGCTTGGGCAGTTTGCA	up	1.75559	0.162966	up	2.27615	0.18215
CHD1	Gallus gallus chromosome W chromodomain helicase DNA binding protein 1 (CHD1W) mRNA, partial cds. [AF181826]	A_87_P037816	TAATGGATGCATTAAGGCTTTAAATGATAATGACTTTGGTCAAGGAAGAACAGGTGGTAG	up	1.75517	0.0527403	up	1.54197	0.146101
CN228249	RJB052D10.ab1 RJtestis Gallus gallus cDNA 5', mRNA sequence [CN228249]	A_87_P020695	CTCCTGACTCAAAACTCTATCTGTGCTTTCCCTTTTGTCAGAGTGGCAGCTTCAGTACAA	up	1.75371	0.51968	up	1.66877	0.637738
CTDP1	Gallus gallus finished cDNA, clone ChEST531c1. [CR387746]	A_87_P015599	GTATACTTTCAGGGGATAGGTGATATTAATGCACCTCCTGGATCAAGAGAAATTCAAATG	up	1.75347	0.0190591	up	1.47112	0.152662
BF724054	0B6f Chick embryonic hindbrain cDNA library Gallus gallus cDNA 5', mRNA sequence [BF724054]	A_87_P034984	GAGCTGTCACTCAGTATGCAACTGTCTCATAGGGCAGCAACTGTGGCATCTCCTGCCTTT	up	1.75301	0.308355	up	1.38164	0.604213
BU204357	603103211F1 CSEQCHN03 Gallus gallus cDNA clone ChEST38e4 5', mRNA sequence [BU204357]	A_87_P033379	AATATGTGCAACTACCAGCAGTTTCTCGCGAGAAATGCCAGAGTTGGCTGGATAGTAAGA	up	1.7527	0.00791509	up	1.62025	0.00503846
RCJMB04_1d1	Gallus gallus mRNA for hypothetical protein, clone 1d1. [AJ719295]	A_87_P037190	ACAATGTCCAGCTGTCCCTGACTCTTGCAGCCTTATCACTTGGGTCTTTTGGTGGACATT	up	1.75029	0.000961954	up	1.69317	0.00638811
RCJMB04_10i2	Gallus gallus mRNA for hypothetical protein, clone 10i2. [AJ851601]	A_87_P035663	GAGTTTCCTCTTTCAGAAAAGCTGAAAGATTGGTAACTATTCATGCCAGACAGACCCTCT	up	1.74971	0.0593434	up	1.4287	0.217337
DNMT3A	Gallus gallus DNMT3A mRNA for DNA methyltransferase 3A, complete cds. [AB214886]	A_87_P038043	GAGGAGGAAACTCCTGGAGGCCACAGAGAAAAGCAAAGGAGGAGAAGGAGGAAAACAACT	up	1.7489	0.00330334	up	1.55808	0.103906
GUCY1B3	Gallus gallus finished cDNA, clone ChEST817j12. [BX950748]	A_87_P021479	TACACTTTCTGCAAGGCTTTTCCTTTCCACATAATATTTGACAGAGATCTGGTGGTCACA	up	1.74845	0.0904	up	1.31193	0.282861
CN218319	RJA028D04.ab1 RJbrain Gallus gallus cDNA 5', mRNA sequence [CN218319]	A_87_P020851	CATGTCTCAACTCCAGGACTGTACATTTTTGGTTTTAATACCGTTGTCAAAGCAAGATGC	up	1.74797	0.114199	up	1.61137	0.196076
ZNF469	Gallus gallus finished cDNA, clone ChEST231n23. [CR406896]	A_87_P012454	TCTGCTCCTTGCTCACCAACCCAAGGTGTCGGGAAAGAAGGACCTGGAAGCACTGGTGAT	up	1.74705	0.0818568	up	1.20682	0.52607
ST6GALNAC3	Gallus gallus partial mRNA for alpha-2,6-sialyltransferase ST6GalNAc III (SIAT7C gene). [AJ634455]	A_87_P037216	AAAGTATTTGCTAAATGGGCCAAGAAGCACACAATAACATTTACACACCCCAACTGGACG	up	1.7453	0.297083	up	1.54696	0.373996
ATP6V1A	Gallus gallus A1 isoform of vacuolar H+-ATPase subunit A mRNA, complete cds. [U22077]	A_87_P009125	AGGGGGTACAACAGCAATTCCCGGGGCATTCGGTTGTGGAAAGACTGTGATCTCGCAGTC	up	1.74515	0.145994	up	1.65004	0.217572
AJ455964	AJ455964 riken1 Gallus gallus cDNA clone 7c18r1, mRNA sequence [AJ455964]	A_87_P037269	CCCGATGCCAAGGCCTACGAAGAAGCCCAAAAACGCCTCAAAGTCGCCGAAGAAGACCAA	up	1.74497	0.0705891	up	1.51473	0.191326
RCJMB04_5i4	Gallus gallus mRNA for hypothetical protein, clone 5i4. [AJ719710]	A_87_P036907	ACAGGAGGGCTCCAAGGATGCTGTGATTCTTTGACAGCTTCTAAGTTTGCTGTCTCTTTA	up	1.74495	0.00218673	up	1.57459	0.0338303
SLC35B1	Gallus gallus mRNA for UDP-Glc/Gal endoplasmic reticulum nucleotide sugar transporter (ERNST1 gene). [AJ535485]	A_87_P037245	ACGAAATTGGCCTCCGTTTTCACCTCTCACTCCAAGTTTATGAGTCCACCTGTAATCAAT	up	1.74474	0.491802	up	1.6483	0.587413
TRPV4	Gallus gallus vanilloid receptor-related osmotically activated channel protein (VR-OAC) mRNA, complete cds. [AF261883]	A_87_P037736	ACCGCTTTGCTTTCCTGCACCATTGGCTGCATTGCGCCAGCAGCTGGGTGCTGGGAGCTT	up	1.74396	0.310443	up	1.55017	0.503068
CR391251	Gallus gallus finished cDNA, clone ChEST700c1. [CR391251]	A_87_P013602	CGAACTGCTGGGAGTGTCCAAAGTGCAACCATGCAGGGAAAACTGGAAAACGGCGATCGT	up	1.74239	0.0658112	up	1.4951	0.116547
CN236484	WLB111B03.ab1 WLtestis Gallus gallus cDNA 5', mRNA sequence [CN236484]	A_87_P020468	AGATTCTTGGAAGAAACTAACCGTCTGTATGCAGCAAAAGGACAGAGGCTTATGCAGGAA	up	1.74233	0.0988429	up	1.40771	0.315397
BX933975	Gallus gallus finished cDNA, clone ChEST54h5. [BX933975]	A_87_P022789	CCTGACCTGCGACTGGGCCGAGAAGATCCTCAAACGTTCCTTCAACAACATCGTGGAGGT	up	1.74122	0.0638588	up	1.49113	0.0626527
CR407470	Gallus gallus finished cDNA, clone ChEST139j12. [CR407470]	A_87_P012050	TCAACGAGCTCTACCAGAAAGCCAAGAAGCAGTCGAAGCCACGGGATGAAGGCTCCGAAG	up	1.73987	0.0261853	up	1.27103	0.194185
LOC378902	Gallus gallus death domain-containing tumor necrosis factor receptor sdownerfamily member 23 variant 2 mRNA, complete cds; alternatively spliced. [AY251409]	A_87_P035223	TACTTTATCTGACAAAGCAGAGAGAGGCCCGGTCTATAGGTGGCTCAAATATATGAATCA	up	1.73985	0.0301467	up	1.30438	0.233047
BX930015	Gallus gallus finished cDNA, clone ChEST772l24. [BX930015]	A_87_P024475	TTGCTGCCTTTTATGATTATAGAGAAGTTTGAAAATATGGCCACTGAATACTTCCAAAGC	up	1.73974	0.238914	up	1.6868	0.305292
ARHGAP21	Gallus gallus finished cDNA, clone ChEST238o6. [CR391720]	A_87_P013266	GTCTCCAACTTCTGCCAAGCTTGTTCAACAAACAAGTGAGAGTTCAGCTACCTCTGATAA	up	1.73847	0.225299	up	1.59124	0.246322
NGFB	Chicken nerve growth factor (NGF) mRNA, 3' end. [M26810]	A_87_P009375	CATGGAGGGCAAGCAAGCAGCCTGGAGATTTATCCGGATCGACACAGCCTGTGTGTGTGT	up	1.73739	0.00275212	up	2.12888	0.0045941
BX934979	Gallus gallus finished cDNA, clone ChEST990l21. [BX934979]	A_87_P022330	CAGAGGAACAGTCCCATCCTGTGTGTCACACAAGCAGTTGCCTGTGGCTGCATCCTGTGA	up	1.73694	0.0143337	up	1.48853	0.0610776
LOC395256	Gallus gallus ovocleidin-116 mRNA, complete cds. [AF148716]	A_87_P037859	TTGTTTCCGTGGAAAGATGTGGGGAGAAAAGCCCTCCAATCCTCATCGTGCTTCTGAAGA	up	1.73675	0.330469	up	1.33875	0.702293
LOC396126	Gallus gallus inhibin/activin beta B subunit precursor, mRNA, complete cds. [AF055478]	A_87_P037958	CACTTATATATCCTACCACTTATAAGTTAATGCTATGAGATATCTTAAAGACACGCACGC	up	1.73663	0.0379169	up	1.43373	0.175824
CAMK2B	Gallus gallus calcium/calmodulin-dependent kinase type II beta subunit mRNA, complete cds. [AF085249]	A_87_P037919	GGAGGGCATGGACTTCCACCGCTTCTACTTCGAGAACTTGCTGTCCAAGAACAACAAACC	up	1.7364	0.0745067	up	1.31541	0.215045
GABRG1	Gallus domesticus GABA-benzodiazepine receptor. [Z25467]	A_87_P008700	TGAGTGTTATCTTCAGCTTCATAACTTTCCTATGGATGAACACTCCTGTCCTCTGGAATT	up	1.73606	0.498023	up	1.57609	0.61041
SHH	Gallus gallus sonic hedgehog mRNA, complete cds. [L28099]	A_87_P009479	ACCACTGGCATCCATTGGTACTCACGGCTCCTCTACCGCATCGGCAGCTGGGTGCTGGAT	up	1.73445	0.29792	up	1.13713	0.702293
TNN	Gallus gallus mRNA for tenascin-W (TNW gene). [AM231718]	A_87_P035333	TCTCCATCCCTTTTACTGAGATGAAGATTCGTCCTCAGTCTTCCAGTAATGAGTCAGTCC	up	1.73381	0.0664643	up	1.31936	0.39056
OGFRL1	Gallus gallus finished cDNA, clone ChEST227j16. [CR390319]	A_87_P014234	AGGAGAAAGCTTCTGAGATTTGCTCAGCAACATTATTCACCATCAGAGCATTTTATCTGG	up	1.73314	0.0783408	up	1.72767	0.302002
CR522895	Gallus gallus finished cDNA, clone ChEST390a8. [CR522895]	A_87_P011988	TGCATGGCTTCTGCTCTCTTCAATGAAAGCCTTAAGTTTCCACATGGTCAAGTGTGCCAA	up	1.73253	0.264895	up	1.18424	0.80691
CD219090	pgr1n.pk008.p15 Normalized chicken reproductive tract cDNA library (pgr1n) Gallus gallus cDNA clone pgr1n.pk008.p15 5' similar to no significant hits (pLog(P) > 4), mRNA sequence [CD219090]	A_87_P021339	TGTCCCGCTGTACAATCCATATGCAACCTACAGTCCCTACGCTGCCTACCAGAGGTCAGA	up	1.73017	0.480964	up	1.16526	0.867502
EDG2	Gallus gallus finished cDNA, clone ChEST80i12. [BX935575]	A_87_P022069	CGTTGTTCTAATTACGGGGGGAAAAAAGCTGTTGTAAAGTCTGCAGGAAAGTAGAAAAGC	up	1.73003	0.00403927	up	1.63398	0.0233656
LOC422632	Gallus gallus finished cDNA, clone ChEST53a24. [BX934417]	A_87_P022596	TGAGCACTAATTTGCGAGCAGGCAAAACTGGGAGCCTACTCCTCTAAAGGAGGATTTTTT	up	1.72946	0.00353209	up	1.32246	0.119332
CRYBB2	Gallus gallus beta B2-crystallin long isoform mRNA, complete cds, alternatively spliced. [AY539830]	A_87_P035143	TACCAGTACCTCTTTGAGAAGGGCGACTACAAAGACAGCTCCGAGTTCGGCGCCCAGCAC	up	1.72829	0.222404	up	1.35598	0.540322
GART	Chicken mRNA for GARS-AIRS-GART. [X54200]	A_87_P008927	CCAGATTCTGGCCATATCCACTGACTTCAAATATTGAACCTGCTCTCAGTCTGATACCAA	up	1.72752	0.00557105	up	1.24443	0.274332
ANKRD11	Gallus gallus finished cDNA, clone ChEST302l4. [CR386715]	A_87_P016287	AAACACAATGCTAACCTTACAGAACAGCACTCCAAGCACTGGAGGACGGACAATTGGAAA	up	1.7272	0.00550168	up	1.31431	0.0631587
CR352704	Gallus gallus finished cDNA, clone ChEST1008h22. [CR352704]	A_87_P018422	CTCAAGTCGCTTTGGGAAGTTTATTCAGCTGAACATCTGTCAGAAAGGAAACATTCAGGG	up	1.72707	0.00912869	up	1.38589	0.199043
BX932741	Gallus gallus finished cDNA, clone ChEST492k14. [BX932741]	A_87_P023386	GGCAAATAACCAAGGGAAAGGATGGGAAAAGCAAGTACTCGACTCTCAGCCTGTTTGATA	up	1.72588	0.467784	up	1.21171	0.830939
D13794	Chicken relB mRNA, partial cds. [D13794]	A_87_P009814	AAATCCACCAACACGTCGGAGCTGCGCATTTGCCGTATGAACAAAGAGAGCGGGCCGTGC	up	1.72444	0.266769	up	1.32959	0.591819
CR387654	Gallus gallus finished cDNA, clone ChEST53f24. [CR387654]	A_87_P015659	CTGGAGAGGGGACCAGGTCATGTGATGCCACCATTCTTAATCACCCTTCCATCAAGAAGT	up	1.72425	0.319489	up	1.29336	0.709769
RCJMB04_1b1	Gallus gallus mRNA for hypothetical protein, clone 1b1. [AJ851373]	A_87_P035826	GCGCGAGGAGCCCTGGCTGAAGAACATCGTCGATGGGAAGGACCAGGTCATCGACCTGAT	up	1.72179	0.341118	up	1.64869	0.426222
BX950640	Gallus gallus finished cDNA, clone ChEST612c17. [BX950640]	A_87_P021536	AGAATATGGAGATTTGCAAGCGGCGGGTGAATATGTATGACACTGTGAACCAGAGCAAGA	up	1.72169	0.00889797	up	1.53511	0.023435
HOXD4	Chicken Chox-a mRNA for homeodomain protein. [X52672]	A_87_P008935	AGAAGATGTGCATAGGAATTAAGTGAAAACGGGTTATTTTGTGTCCTGATGGTGTTAGCG	up	1.72144	0.0151101	up	1.69852	0.0373995
LOC416146	Gallus gallus finished cDNA, clone ChEST605j16. [CR406019]	A_87_P013045	CTCCTCAGGTTTTTAGTATTTTTGTTTCAGTATTGTACTTTTGCTCAACTGTATGGGTTG	up	1.72113	0.254295	up	1.00519	0.993351
RHOQ	Gallus gallus Rho small GTPase TC10 (chTC10) mRNA, complete cds. [AF372468]	A_87_P037659	TCCAAAGAAACACACGGTGAAGAAGAGAATAGGTTCGAGATGCATAAACTGCTGTTTGAT	up	1.72039	0.00680855	up	1.28789	0.115737
CO421061	GGEZHC1020A02.g HC1 Gallus gallus cDNA clone GGEZHC1020A02, mRNA sequence [CO421061]	A_87_P020340	CTGTGCCTGGAGGACATAGACAAGAACACATCGGACGCCATCAACGCAGAGGGCTTCACT	up	1.71901	0.0469881	up	1.48395	0.0628496
DQ358721	Gallus gallus growth arrest and DNA-damage-inducible protein 45 alpha (gadd45) mRNA, complete cds. [DQ358721]	A_87_P009667	GTGCCGGTGATCAACCTCCCCGAACGGTGACCGCGGCCCGAAGCTCACGAAATCCTTTTT	up	1.71898	0.00254576	up	1.50278	0.0172794
RCJMB04_2i22	Gallus gallus mRNA for hypothetical protein, clone 2i22. [AJ719462]	A_87_P037072	CTATTCCAGGACTTCAAACGGCTCCTCTACAACAGCATGGACCCTGTGCTGCGTGCCATG	up	1.71854	0.471576	up	1.06824	0.917742
CR523146	Gallus gallus finished cDNA, clone ChEST1037b14. [CR523146]	A_87_P011806	GCTAGTAAAAGGCGGTTTGAACGTGACTGCAAAGAAGCTGATCGAGCACAGCAATATTTT	up	1.71799	0.0293156	up	1.60709	0.0572866
BX933600	Gallus gallus finished cDNA, clone ChEST948o18. [BX933600]	A_87_P022942	GCTAAAGTTGCTGATCTGGTACTGATGCTCATTGATGCCAGCTTTGGATTTGAGATGGAA	up	1.71793	0.0705607	up	1.20152	0.52117
BI394278	pgp1n.pk014.b20 Normalized Chicken Pituitary [BI394278]	A_87_P034907	TGGCAAGAGGCACGACAGATTTGGGGACAAATCCCAGTCCTGTGGACACGCCTACATCCT	up	1.71669	0.154062	up	1.63913	0.217919
INHA	Gallus gallus inhibin, alpha (INHA), mRNA [NM_001031257]	A_87_P009240	CTACTCCTTCAAGTACGAGACGGTGCCCAACATCCTGGCGCAGGACTGCACCTGTGTCTA	up	1.71647	0.208125	up	1.23378	0.648814
MFGE8	Gallus gallus finished cDNA, clone ChEST923a15. [CR390312]	A_87_P014238	CATCGTTACGCAGGGAGCTCGTGACTTTGGCCACATCCAGTACGTGGCAGCCTACAAAGT	up	1.71647	0.0824446	up	1.60945	0.168798
LASS5	Gallus gallus finished cDNA, clone ChEST65p14. [BX931001]	A_87_P024120	GGCAATGGAGGACCTGCATGTCAGTCACGAGCAGAATTTTGGAAATTTCTTGAGTTGCTA	up	1.7162	0.00173775	up	1.45364	0.0264502
CAB39L	Gallus gallus mRNA for hypothetical protein, clone 8c18. [AJ719912]	A_87_P036771	GACCCTTCCGCACGCAGCATTCCTCTTCTACACTGAAAGAAAAAATCCAGGTGAAGAAAA	up	1.71608	0.0244783	up	1.46758	0.0296579
CN219175	WLA002A10.ab1 WLbrain Gallus gallus cDNA 5', mRNA sequence [CN219175]	A_87_P020837	TGCCACTGTCTGTGTATCTCTCACCGGTCACTCTATGGGCACAAACCCAGGGGACGCATT	up	1.71533	0.524913	up	1.95753	0.498906
LOC420501	Gallus gallus finished cDNA, clone ChEST307c2. [CR523260]	A_87_P011735	GCATCTGCTGATTCCTTAGAGGCCATGTCTGAGGGTGATTCCCCAACTCCCTTCTCAAGG	up	1.71447	0.523876	up	1.99257	0.414463
AJ456523	AJ456523 riken1 Gallus gallus cDNA clone 8m6r1, mRNA sequence [AJ456523]	A_87_P037261	GAGGAGGATGATTTTGATTACTTTGTGCGGTGTGTTGAGCCTCGACTGAGACTGCATTAT	up	1.71233	0.32176	up	1.71726	0.356914
ID3	Gallus gallus helix-loop-helix protein (Id3) mRNA, complete cds. [AY040528]	A_87_P035302	CCCGGCTGCGACTTTTGGAGCGGCGCTCCCCAAATCCCGGCTTTCTTTTTAGGACTTTTT	up	1.71163	0.0460377	up	1.0719	0.648982
AJ454764	AJ454764 riken1 Gallus gallus cDNA clone 3k24r1, mRNA sequence [AJ454764]	A_87_P037286	CTGCCAGAAACTGCCCGGGAGCAGCTCAATGCCCACATGGAGCTGTACGGGCAGCTGAAA	up	1.70947	0.554697	up	1.45658	0.526578
SLC9A3R1	Gallus gallus finished cDNA, clone ChEST127h22. [CR353503]	A_87_P017899	CTGTGGATGTTTTGTTTCTGTGTTTTGCAATCAGGTGTTGTATTGTCAAGCTGAAGAGAA	up	1.70918	0.00305277	up	1.33323	0.0508727
ZHX1	Gallus gallus finished cDNA, clone ChEST206p20. [BX931133]	A_87_P024042	AGACATGCCAAATAGTTGGTCAGCCAGGACTTGTTCTCACTCAAGTCGCAGGTACAAATA	up	1.70855	0.105583	up	1.22752	0.514555
GRX	G.gallus mRNA for glutaredoxin. [Y09235]	A_87_P008749	CCATTTCATTCACATGTACCTCAACATGTCACATCTCTTCCTACTTTCTGTGGTACTGAA	up	1.70687	0.053982	up	1.28245	0.26882
SUSD3	Gallus gallus finished cDNA, clone ChEST396e18. [BX931505]	A_87_P023901	TATTTAACAGAAATACTTTGAGGTCTGATATAAATAAAACAAGGAATGTTGGGGCTGGCC	up	1.70608	0.0184754	up	1.84976	0.0302151
AI982387	pat.pk0037.e9.f chicken activated T cell cDNA Gallus gallus cDNA clone pat.pk0037.e9.f 5', mRNA sequence [AI982387]	A_87_P037543	TTCTTAAAGGGCAAGCAGCTCATTCGCCGTGCCACAGCGTGCAGGTGTGGCTGGCAAAAA	up	1.70512	0.00172146	up	1.62502	0.0138885
BI394315	pgp1n.pk014.d23 Normalized Chicken Pituitary [BI394315]	A_87_P034906	ATGCGTTTTGGAGAGGCCGTCTCCCAAAGAGGCGCTCGCAGTGTGCATCCAAAGCTGTTT	up	1.70467	0.249948	up	1.64803	0.310814
PENK	Gallus gallus finished cDNA, clone ChEST570m20. [CR405789]	A_87_P013199	TCTGGTTTAGTCAAGTTTCAGTCTGTGCTGTAGTTTCCATGCTAAAACGATTTTGATTAC	up	1.70365	0.00135226	up	1.98586	0.00926584
LOC424012	Gallus gallus finished cDNA, clone ChEST913h9. [BX933838]	A_87_P022849	CCCATGAGGAAATCTGCACCACCAATGATGGTATCATGTACCGTGTTGGGGACCAGTGGG	up	1.70286	0.177301	up	1.42085	0.328114
PAPSS1	Gallus gallus finished cDNA, clone ChEST459i16. [CR406042]	A_87_P013027	GCTTTACTGCGATTGACTCTGAGTATGAAAAACCAGAAGCCCCAGAGCTTGTGCTGAAAA	up	1.70168	0.32281	up	1.99317	0.256098
FOXD2	Gallus gallus winged helix protein CWH-1 mRNA, complete cds. [U37272]	A_87_P009089	CCCCCCAGTCTCCTCCCGTTGTGTTTTAAGGTAGGAAAAAATATATCTATATCTATTTTT	up	1.70134	0.0337955	up	1.36033	0.340905
IFT81	Gallus gallus finished cDNA, clone ChEST709g12. [BX932863]	A_87_P023306	TCATCAACGAATGCTTGAAATAGCAAGACAGCTTCGCTTAGAAAAGGAGAGAGAAGAATC	up	1.70097	0.0788784	up	1.35418	0.274361
CR386596	Gallus gallus finished cDNA, clone ChEST765k8. [CR386596]	A_87_P016365	TCAGAAACGTGCTAGTAGACATATTCAACAGCAGTCTGTAGGAGCTGTTCCACTTGGTGT	up	1.70013	0.393565	up	1.39462	0.653582
RCJMB04_13o18	Gallus gallus mRNA for hypothetical protein, clone 13o18. [AJ720273]	A_87_P036519	ATATATGAACTTCTAAGTGTTTGAAGAACATTGTGCCAATAATATATGCCAAATCTTAAG	up	1.69973	0.121637	up	1.42711	0.215701
P56LCK	Chicken tyrosine protein kinase (p56lck) mRNA, 5' end. [M85043]	A_87_P009284	TATGACTATGAACCCACTCACGATGGGGACCTGGGACTTAAGCAGGGCGAGAAGCTGCGC	up	1.69741	0.511471	up	1.60439	0.620149
COCH	Gallus gallus Coch-5B2 mRNA, complete cds. [AF012252]	A_87_P038020	TTGGATAGTTTCTGAAACTAAAAATTATGAGACTGGAACGGTCCCTCTTAAATACACAAG	up	1.69724	0.341776	up	1.68627	0.414248
RCJMB04_11i10	Gallus gallus mRNA for hypothetical protein, clone 11i10. [AJ720147]	A_87_P036607	CATCACCTCCAAGGACCCTGTGCTGAGGGCGCTGCCAGACATTGGGCAGCTGAAGGTACT	up	1.69631	0.138804	up	1.36041	0.331399
M63560	Chicken calponin beta mRNA, complete cds. [M63560]	A_87_P009315	CTTCCTGCGGGCCATCAAACACTACGGAGTGAAACCCCACGACATCTTTGAGGCCAACGA	up	1.69536	0.002026	up	1.1117	0.318125
AFAP	Gallus gallus neural actin filament protein mRNA, complete cds. [L20302]	A_87_P009494	AACAACACTGAAGACTGGTGCATTATTTAAGACAGATGTGAACTCATTTCAGATAAGTGC	up	1.69244	0.273984	up	1.84317	0.263718
RCJMB04_8j12	Gallus gallus mRNA for hypothetical protein, clone 8j12. [AJ719938]	A_87_P036754	GATAGATGAGTCCTCTCAAAAGCAATGAAAGAAAACAAAAGTTTAACTCCAGAAAATGCC	up	1.69154	0.213307	up	1.51488	0.328628
BX930682	Gallus gallus finished cDNA, clone ChEST973j19. [BX930682]	A_87_P024208	ATTACGATGACGCGTACAGCGGGATGGCCGACTACTACAAGCGCTACCGCGTCAGGTCCT	up	1.69013	0.0213847	up	1.40089	0.0531748
UTRN	Gallus gallus finished cDNA, clone ChEST986m10. [CR338920]	A_87_P018745	GGGATTCTTGATGATATCATCAGTGAAAAATTGGAGGCTTTCAATGCCCGCTATGAGGAA	up	1.68837	0.0845985	up	1.29165	0.353077
LOC416054	Gallus gallus finished cDNA, clone ChEST486g20. [BX936097]	A_87_P021804	CTCATGTAGCACAGAGGTGCCCTGTAGCTCAGTGCCTAGGAGGTGATGTAGCACCTCGAA	up	1.68735	0.0840429	up	1.10952	0.701722
NDP	Gallus gallus finished cDNA, clone ChEST740l1. [BX929635]	A_87_P024649	ATGAGGCATTATTCCCCTCTAAAAGCCTGTAAATGTGACACGTACATCTGTCACAAAAGC	up	1.68706	0.0179381	up	1.08403	0.591028
NP347105	GB|S66185.1|AAB28451.2 adrenergic receptor subtype alpha-2A [Gallus gallus] [NP347105]	A_87_P008433	CAATGACGAGAAGTGGTACATCATCTCGTCGAGCATCGGCTCCTTCTTCACCCCGTGCCT	up	1.68669	0.299622	up	1.25534	0.659908
LOC416686	Gallus gallus finished cDNA, clone ChEST487i11. [CR387487]	A_87_P015784	CTTGCTACAGAACAGATGGTTTTGCACTGATGTTTTATATATAAAGGGTATATATTATAA	up	1.68511	0.040364	up	1.24158	0.334768
HOXA7	Gallus gallus homeodomain transcription factor HoxA-7 (Hoxa-7) mRNA, complete cds. [AF408695]	A_87_P037635	CAACCAGGCTGAGGCTAATTTCCGGATATACCCCTGGATGAGGTCTTCAGGTCCCGATAG	up	1.68508	0.00228847	up	1.51273	0.00273041
CCDC21	Gallus gallus finished cDNA, clone ChEST759p19. [BX950372]	A_87_P021655	AAGGTGCTGCCAGAGATCAAGCAAGTTGCAGGGGCTAATGGAGCCTGTGAATCCCAGGAC	up	1.68381	0.10667	up	1.64942	0.146952
CN218257	RJA027D12.ab1 RJbrain Gallus gallus cDNA 5', mRNA sequence [CN218257]	A_87_P020853	GTGTGACAAATACTACATGGCCTCTCCCGACCTGGAGATCGAGGAGGTGAACGCCAGCAA	up	1.67945	0.508426	up	1.50846	0.6472
LOC395991	Gallus gallus crescent mRNA, complete cds. [AF006508]	A_87_P038023	CGACGGCAGCATCCTCTGAACAGACTGCGTTTTGAAAACACAACAAGTAAAAGCTCTGAT	up	1.67938	0.134236	up	1.62895	0.19035
CR390404	Gallus gallus finished cDNA, clone ChEST276a23. [CR390404]	A_87_P014180	GTTGCTCTATACTTGCTGATCCTATGAGAATGTGAAACTGGATAATATATGAAATGCAAC	up	1.67897	0.0118009	up	1.60198	0.0418148
CR406372	Gallus gallus finished cDNA, clone ChEST321i17. [CR406372]	A_87_P012823	GGAGCAAAACCTCCCTGGCTAACAGAAGAAGATGAGGAGGATGGAAGCAAACAACAAATT	up	1.67854	0.009972	up	1.46032	0.0310615
LOC422804	Gallus gallus finished cDNA, clone ChEST442j22. [CR407441]	A_87_P012069	ACTACTACTTAGAGCAGCTTCACAAATATAGAGAGAAGTCCACATGCGACGCTTTCACAT	up	1.678	0.154062	up	1.38819	0.132393
CD216128	pgp2n.pk010.a3 Normalized chicken pituitary [CD216128]	A_87_P021377	GGTCCCTATAAGGAGTACCGGGAGCAGGCACAGAAATGGGGCCGGTATTCGGATGAGGTG	up	1.67799	0.282531	up	1.66298	0.295151
CGNL1	Gallus gallus finished cDNA, clone ChEST593k20. [BX930099]	A_87_P024436	TGTGGAGCTTCAGAACCAGCTTGATGAATACAAAGAGAAAAATCGCAGAGAACTTGCAGA	up	1.67737	0.307191	up	1.3863	0.580627
AJ446062	AJ446062 riken1 Gallus gallus cDNA clone 12e21r1, mRNA sequence [AJ446062]	A_87_P037331	GGAGCAACACCAAGAGAAATTGATAAGGCAACAGTTAAATCGAAGAAAGCTACAGATACC	up	1.67733	0.462001	up	1.61022	0.537322
HMGA1	Gallus gallus finished cDNA, clone ChEST911p8. [BX933876]	A_87_P022833	ACCCAAAAAACCGCAGCAGGACGAGGAGGAGGTGAACATTTCCCAGGAGTCATCCGAGGA	up	1.67608	0.0247496	up	1.13924	0.429109
DTX2	Gallus gallus finished cDNA, clone ChEST659g1. [CR387657]	A_87_P015656	GGAATGAGATCCACCACAAAACAGAGATGGACACAAACCTGAGTGGCCACGGCTACCCTG	up	1.6754	0.00320681	up	1.60106	0.00847474
AY339626	Gallus gallus peropsin-like visual pigment mRNA, complete cds. [AY339626]	A_87_P035198	AGGAGTTAAATCTGGGTTACGGTTTATTTTTTGGAATAACAATCTGCCTCTTCCAGTCAA	up	1.67518	0.160405	up	1.23207	0.586881
CN221621	RJA078C02.ab1 RJbrain Gallus gallus cDNA 5', mRNA sequence [CN221621]	A_87_P020810	TCCATTAAATTATGCAGCAGCCTGTGATATACTAATTCAACGTCCTACCAATAGATTATT	up	1.67447	0.148568	up	1.35999	0.378279
RCC2	Gallus gallus partial mRNA for hypothetical protein, clone 23b17. [AJ851734]	A_87_P035578	TTCAGCATGATCATGGACTGCAAAGGAAACCTCTACTCCTTTGGGTGCCCAGAGTACGGG	up	1.67411	0.00587244	up	1.34888	0.0264502
BQ484796	pmp1c.pk006.k5 Chicken Macrophage cDNA library Gallus gallus cDNA clone pmp1c.pk006.k5 5', mRNA sequence [BQ484796]	A_87_P034808	TTTCCCTTTCTCTTCTCCTGTTTTCCCCTAAAGTCAATTGCTTCAAGCTGACAAGGGATT	up	1.67404	0.470327	up	1.41594	0.584719
LOC416418	Gallus gallus finished cDNA, clone ChEST26d16. [BX936038]	A_87_P021825	AAATAGGAAGTATATGCAAGAGTGAGGGTAGTAATTCTAAGTAATGCTTCAACTGAAGAC	up	1.67258	0.0516871	up	1.3384	0.21887
CR338929	Gallus gallus finished cDNA, clone ChEST986b5. [CR338929]	A_87_P018737	CCATCCCTGCCCTGATGTGTCCCCTCCCATTGCCTGCTTTCGACTCTTTCGTAACCAAAT	up	1.67033	0.00732325	up	1.47386	0.0404471
RAD50	Gallus gallus finished cDNA, clone ChEST766f2. [BX929985]	A_87_P024494	CAGTTGAGAAGAATCTCATGGAAGTTATGTCGCTGGACAATAACGTGAAAGCCCTGGAGA	up	1.66995	0.0531278	up	1.14135	0.69319
PXDN	Gallus gallus finished cDNA, clone ChEST824h2. [CR523669]	A_87_P011454	CAGAGCTGAAGGCAATCCTAAACCAGAAATTATTTGGCTTCGAAACAATAATGAGCTCAT	up	1.66693	0.0608159	up	1.44631	0.128723
COL4A3BP	Gallus gallus finished cDNA, clone ChEST598d23. [BX932493]	A_87_P023470	AGACTTTAAAGGAGAAGCTATAACTTTCAAGGCAACTACTGCTGGAATCCTTGCTACACT	up	1.66667	0.0270962	up	1.52102	0.116814
WNT8A	Gallus gallus mRNA for WNT8C, complete cds. [AB193181]	A_87_P038055	GGAGTGCGGCCTCAAAGTGGAGGAGAGGAGGACAGAGGTGGTCAGCAGCTGCAACTGCAA	up	1.6655	0.20795	up	1.90193	0.143735
CR387701	Gallus gallus finished cDNA, clone ChEST76i10. [CR387701]	A_87_P015629	AGATGGCAGGGAAAGATGAGAATAATTCATGATGCCTCTAGCTCTACTATGCACTCCCCT	up	1.66528	0.00912869	up	1.59295	0.0456275
LOC395976	Chicken mRNA for glutathionine S-transferases CL2. [X58248]	A_87_P008911	CCCTGGAGAAGATCTCTGCCTATATGCGCTCGGGGCGCTTTATGAAGCCCCCCATTTTCT	up	1.66513	0.205402	up	1.45784	0.350921
RCJMB04_14c24	Gallus gallus partial mRNA for hypothetical protein, clone 14c24. [AJ720287]	A_87_P036510	AACTGTTATCACTATGGTACTGTAGAAGAATTTGTTCCTGAAGGGAAATTTTGCAGCCAA	up	1.66508	0.0350644	up	1.68622	0.0663969
ZNF326	Gallus gallus mRNA for hypothetical protein, clone 22c23. [AJ720632]	A_87_P036279	AGTGTGGCTGTTTTGGGAACTGCATTGCACTCTGTATAATAGAATATGTGTTATAATATG	up	1.66434	0.0702864	up	1.22688	0.334778
AM069290	AM069290 Chicken immune 4 - CSEQRBL09 Gallus gallus cDNA clone C0000874K08_T7, mRNA sequence [AM069290]	A_87_P035354	TGTCCTGTTGGGGTAATTAGCAGCAAAGGTTTCTGCTCAATGCATTATTATTAGCAGTTT	up	1.66353	0.0703784	up	1.89072	0.0417043
SYNE1	Gallus gallus finished cDNA, clone ChEST775a7. [CR387207]	A_87_P015976	AATTTTGCCTTCTGAACTCTCTCTTCATTTAGCAGAAGTTGGACTGGCCCTTGTAACTGT	up	1.66338	0.00607962	up	1.37494	0.201053
AJ971234	Gallus gallus partial mRNA for adenomatous polyposis coli 1 (APC1 gene). [AJ971234]	A_87_P035507	TACAACACTTGAAGTCACACAGTTTGACAATAGTCAGTAACGCATGTGGAACCCTGTGGA	up	1.66305	0.302586	up	1.26379	0.678817
BM491924	pgp2n.pk007.n14 Normalized Chicken Pituitary [BM491924]	A_87_P034829	TTCCTCTATGTTAGAGACCAGTGCATGGTGCTATAGCTGGCGGATCGGGGGCAGTGAGCA	up	1.66221	0.222908	up	1.64373	0.250719
LOC420476	Gallus gallus finished cDNA, clone ChEST41l16. [BX933114]	A_87_P023194	GCAAGAATTTTAGGCATAGAAATAGCAGTGGAATCTCTCCTTCCAGATGACCACGTTGGG	up	1.66187	0.00980279	up	1.3283	0.16876
RCJMB04_25b13	Gallus gallus mRNA for hypothetical protein, clone 25b13. [AJ720763]	A_87_P036196	CTGCCCAGTTTGGACATACTTCAATTGTTGCATACCTGATAGCAAGGGACAGGATGTAGA	up	1.66086	0.193321	up	1.68735	0.218455
LRRC17	Gallus gallus partial mRNA for p37NB protein. [AJ295847]	A_87_P037458	TTGCAAGACTATTTGCCTACAAGGATTTCTGTTTAATGTAGTGAACAAATACAGAATGGC	up	1.66084	0.548562	up	1.57636	0.620548
SPEN	Gallus gallus finished cDNA, clone ChEST329n3. [CR388967]	A_87_P015114	ACTAGAAAAGGAGAAAACGGATAAGCAAAAACGAAAAGCAAAGATCCATTCACCCAGCTC	up	1.66016	0.134341	up	1.37233	0.262203
BX930412	Gallus gallus finished cDNA, clone ChEST638o19. [BX930412]	A_87_P024309	CTGAGAGTGAACCTTATGATGATGAGGAGTTTGAAGGTTATGAAGAGAAACCAGATGCAT	up	1.66009	0.0938542	up	1.58037	0.114855
ERBB4	Gallus gallus chromosome 7 ovarian receptor tyrosine kinase erbB4 precusor (ERBB4) mRNA, complete cds, alternatively spliced. [DQ069275]	A_87_P009704	GCAGATCTGAGGGGCAGATGGTCAGAGAAGCCAGACAGTACAGAAAATCCATGGCAGTGT	up	1.66007	0.390318	up	1.90256	0.299271
Y14832	Gallus gallus RNA for CpG island, clone 8. [Y14832]	A_87_P008725	AAGGCGGTCTTATATCGGTTCAGCTGGTCACGGTTCTCACACGGTGGCCTTATCTTCCCT	up	1.65983	0.616838	up	1.11992	0.910932
HOXA2	G.gallus mRNA for Hoxa2 protein. [X74323]	A_87_P008837	CGTAGATATCTCCGCTGACAGCTTTGACTTTTTTACAGACACGCTCACCACGATTGACTT	up	1.65976	0.0913164	up	1.46713	0.233115
RCJMB04_2h14	Gallus gallus mRNA for hypothetical protein, clone 2h14. [AJ719449]	A_87_P037083	ACTTTCAATGGAGGACTGCAAAGACCTTGAGAACTTAGAGTCTTTTACGGACATCCTGGA	up	1.65908	0.328217	up	1.58715	0.294502
BQ484995	pmp1c.pk007.k22 Chicken Macrophage cDNA library Gallus gallus cDNA clone pmp1c.pk007.k22 5', mRNA sequence [BQ484995]	A_87_P034806	AGAGCCCCTCTGCAAACTAAACTGTTGACAACAAGTTTAAAACCAATGGATATTCATTAC	up	1.6589	0.530712	up	1.57581	0.628575
LR8B	G.gallus mRNA for LR8B protein. [X97001]	A_87_P008776	AGAAGGGTAACCACAGAGTTATAATGAACTGCAAACATCCAAAGGATGTGAGAGTTTTGT	up	1.65866	0.0184754	up	1.76193	0.0307909
CD218974	pgr1n.pk008.j5 Normalized chicken reproductive tract cDNA library (pgr1n) Gallus gallus cDNA clone pgr1n.pk008.j5 5' similar to gb [CD218974]	A_87_P021342	GCTTTCTGCTCTGGTCAACAACCACAACCAATGGCTCCAGCAAGGTCTGGCACAGCCGGC	up	1.65823	0.331823	up	1.35188	0.645944
DNAJC5	Gallus gallus finished cDNA, clone ChEST755g22. [CR406363]	A_87_P012831	CCAGAGGTGTGTGGAGGCAGCTACCACTTGTCTTAGAATAGGCAAACCAGGTGCCAGGGA	up	1.65776	0.00202491	up	1.46503	0.0313247
RAR-ALPHA1	Gallus gallus retinoic acid receptor alpha isoform 2-2 mRNA. [X78333]	A_87_P008827	ATAAGAAGAAGAAGGACGTGCCGAAGACGGAGTGCTCGGAGAGTTACATCGTCACCCCCG	up	1.65646	0.0232548	up	1.52266	0.0470008
OTUD6B	Gallus gallus mRNA for hypothetical protein, clone 24h18. [AJ720738]	A_87_P036214	TACAATCTGTATAAAGAAAAAGAATGTTTTAGTAGAGTGAGCAGAAGATCCTTGCTCCTG	up	1.65622	0.57502	up	1.74161	0.575113
CN229105	RJB066H11.ab1 RJtestis Gallus gallus cDNA 5', mRNA sequence [CN229105]	A_87_P020659	ATGGAGATGCTTCGTCTGAATGCTCTGTACTATGGCATATTTTAATGGATCTTCCGCAGT	up	1.6561	0.186847	up	2.15733	0.22308
CHRNB3	G.gallus mRNA for nicotinic acetylcholine receptor (nAChR) beta 3 subunit. [X83739]	A_87_P008814	TGCTCCTCCACATTTGGAAACTATGATTCCTTCACCTGCATGTTCACAGGACTGGAAGAT	up	1.65453	0.579982	up	1.62625	0.643192
CHRM3	Gallus gallus M3 muscarinic acetylcholine receptor (mACHR) mRNA, complete cds. [L10617]	A_87_P009512	CCAGTGTGACAAACGAAAACGACGCAAACAGCAGTATCAGCAAAGGCAGTCTGTCATTTT	up	1.65364	0.238439	up	1.25766	0.595871
AY640308	Gallus gallus homeodomain transcription factor DLX6 (DLX6) mRNA, complete cds. [AY640308]	A_87_P035097	TTAGCTGTACATAATACTTTGTATGGTTTGGTCTCCTTTCATATCTAGAGTAAAAGCCAC	up	1.65324	0.216927	up	1.59329	0.256927
BG713679	pgl1n.pk012.n1 Normalized Liver Library Gallus gallus cDNA clone pgl1n.pk012.n1 5' similar to gi [BG713679]	A_87_P034945	TGGATCCCTCTTGCCACTGAATACCAGCTCATAGGAAGCTATGCCCAGACCGAACTGGGA	up	1.65297	0.410769	up	1.53414	0.509554
CO771540	testis_EST02637 Testis cDNA Library Gallus gallus cDNA 3', mRNA sequence [CO771540]	A_87_P019188	CCACCGAGGTGACTCAGTTCGGGATGAGCCCTTGGGGTGAGCTGAAGGCAAATAAAGCTT	up	1.65199	0.0261216	up	1.41277	0.127426
BX935547	Gallus gallus finished cDNA, clone ChEST80j16. [BX935547]	A_87_P022085	GTCGTCTTTCACGTTTCTAACACCACGTCTGTATGGCTGTAGACAGAAAAGAATGACTTT	up	1.65172	0.252691	up	1.43032	0.431796
SPON1	Gallus gallus F-spondin precursor, mRNA, complete cds. [AF149302]	A_87_P037858	CTTACTTAAATAATCTGTGCAGCTCAATAGTGATGTCAGCCCATAACACAGTCACAACAC	up	1.65038	0.0219622	up	1.38617	0.234378
DQ163091	Gallus gallus neuroligin-3-like mRNA, partial sequence. [DQ163091]	A_87_P009686	AGGACACCAAGTTCATCCACACCAAGGCCAACAGGTTTGAGGAGGTGGCCTGGTCCAAGT	up	1.64839	0.276103	up	1.15226	0.825913
DN830107	DT40subNB_10C2 DT40subNB Gallus gallus cDNA clone DT40subNB_10C2 5', mRNA sequence [DN830107]	A_87_P009750	CCTCTGCCCCTGTGCTCTGCACAGAAAAGGTGAAAGTTTTTCCAAGCTTTCATTAAAAAT	up	1.64734	0.45345	down	1.00832	0.987022
RCJMB04_33f6	Gallus gallus mRNA for hypothetical protein, clone 33f6. [AJ721046]	A_87_P035980	TTGTGTTGCTTCTAAACCAGACTAGATCCAACATTATTACAGTAGGATGATCTTGCCAAA	up	1.6458	0.00652428	up	1.35393	0.101161
TIRAP	Gallus gallus toll-interleukin 1 receptor domain-containing adaptor protein (TIRAP) mRNA, complete cds. [DQ019929]	A_87_P009708	GGAGCTCCACGAGTGGAATGCAGTAGAGCCTACTGGGGGCACTTGTATCTGAGCAAAGCT	up	1.6458	0.00585617	up	1.23134	0.144688
RCJMB04_6c21	Gallus gallus mRNA for hypothetical protein, clone 6c21. [AJ719759]	A_87_P036877	GTTCTGTTCATGTGGATTGCTGATGTAGATCTTAACAACTAAAATGGTACAATGCTGTCC	up	1.64462	0.0701849	up	1.9083	0.0367894
HAS2	Gallus gallus hyaluronan synthase 2 (HAS2) mRNA, complete cds. [AF106940]	A_87_P037890	CTTTTTTATAGTTCTTTTTATAGGAAGGGTCTTTTGTGTTAGGCTGCCAAATGTAATGCC	up	1.64292	0.00358102	up	1.17462	0.219146
LOC396120	Chicken alpha8 subunit of nicotinic acetylcholine receptor. [X52296]	A_87_P008938	GGCTGTGACATTTACTTCTCAGATTTGACAGGCATCTCTCCGCAGTTTTATGATGCTGCA	up	1.64127	0.366347	up	1.29638	0.500746
STXBP6	Gallus gallus finished cDNA, clone ChEST743a2. [BX929546]	A_87_P024683	AGGGAATCTGTTTCCAGTGCTGCATTTTGAATATTTCTATTTTAACTTCCAGATGGATTG	up	1.64059	0.0278637	up	1.32888	0.187934
BX932105	Gallus gallus finished cDNA, clone ChEST157e17. [BX932105]	A_87_P023652	GGAGGAGAACAGACAATTGAGAAAAGCTCACCAGGATGTTCATACCCAATTACAAGATGT	up	1.64025	0.0197011	up	1.27874	0.237756
AJ455141	AJ455141 riken1 Gallus gallus cDNA clone 4l1r1, mRNA sequence [AJ455141]	A_87_P037281	TTGAACAGCCCAGTTTGTTAGTATTTCCCATTCCCCACGCCAGAAAACCCTTTTGGCTTT	up	1.6393	0.429354	up	1.30819	0.558945
AW239735	pti1c.pk001.i19 chicken MDV infected T cell cDNA library Gallus gallus cDNA clone pti1c.pk001.i19 5', mRNA sequence [AW239735]	A_87_P035326	TGCTGTGCTGTGGGCAACAACAAAAAGCGGTTTTTGTTCCCCGTTTCCCACCAAAAATTA	up	1.63925	0.334072	up	1.3401	0.620548
DHRS8	Gallus gallus finished cDNA, clone ChEST943c3. [BX933660]	A_87_P022928	GACCAACCAGAAAATGGTTTTTGTTCCATCAAATCAACGCTTTGCTTTACTTCTTGAAAG	up	1.6386	0.010407	up	1.40972	0.0628684
COL5A2	Gallus gallus finished cDNA, clone ChEST861l17. [BX935516]	A_87_P022106	GTAGTGGTGATCCTGGTAAACCAGGAGAAGCAGGAAATGCAGGTGTTCCAGGACAAAGAG	up	1.63729	0.00219957	up	1.37504	0.0117808
AJ720014	Gallus gallus mRNA for hypothetical protein, clone 9h20. [AJ720014]	A_87_P036700	GAAAAAACAAAAGGCTGTATGGGTTCTATTGTAACATTGGAAAGGAATAAATGGTGATCC	up	1.6368	0.00834958	up	1.38728	0.048482
RCJMB04_1m21	Gallus gallus mRNA for hypothetical protein, clone 1m21. [AJ719385]	A_87_P037125	TGCAAAAAAGGCTAAAAGTCCAACTCAGAGCCCATCACCTGCGAGGAATTCAGATCAAGA	up	1.6367	0.067862	up	1.13266	0.269856
LCP1	Gallus gallus mRNA for hypothetical protein, clone 4k19. [AJ719624]	A_87_P036964	CTCCTTCCCCAGCCCCTTCAGAATTGCCTTAATAAAGAGCCGATATCCAATGATATGAGA	up	1.63613	0.264424	up	1.30772	0.316472
THRA	Chicken c-erbA mRNA for thyroid hormone receptor. [Y00987]	A_87_P008760	ACTACATCAACTACCGCAAACACAACATTCCCCACTTCTGGCCCAAGCTGCTGATGAAGG	up	1.63576	0.198852	up	1.23821	0.558576
LOC396415	Chicken homeobox protein hoxd13 mRNA, complete cds. [L09550]	A_87_P009514	TGTAATTTTAAACCTAGCGTGCATGTTATGCTATACGCAGGGAGGTCAGCTCCTGGGAAA	up	1.63538	0.0135624	up	1.92422	0.0197306
TNFAIP6	Gallus gallus tumor necrosis factor-inducible protein 6 precursor (TSG-6) mRNA, complete cds. [DQ275160]	A_87_P009676	TGAAGTTTCTGTCAGATGCCTCAGTGACTGCTGGTGGGTTTCAGATTAGGTATGTTACGA	up	1.63507	0.00255954	up	1.36748	0.0954816
MAB21L1	Gallus gallus cell fate determination protein (MAB21L1) mRNA, complete cds. [AY049705]	A_87_P035293	CCCGAACCGGCTTCTGTCCCGACGAAGTTTAAGCTTCCCGTTCGAAAAGTCAGAGATTTC	up	1.63487	0.00314483	up	1.45069	0.0172794
CN217375	RJA010D09.ab1 RJbrain Gallus gallus cDNA 5', mRNA sequence [CN217375]	A_87_P020860	TTGATTCAGGTTAACCTTTATTTCTTTTCCTAATCTCCATCTCTTCCATAACATGGGAGA	up	1.63288	0.0650032	up	1.41387	0.186247
PRLHR	Gallus gallus prolactin-releasing peptide receptor mRNA, complete cds. [AY847003]	A_87_P035037	TACAAATTGCATTATGGCCAACGTGGTGCTGTAAACATAAGAGCTGGTGGGAGTGCACTT	up	1.63248	0.473567	up	1.46422	0.673761
CN227056	RJB008G08.ab1 RJtestis Gallus gallus cDNA 5', mRNA sequence [CN227056]	A_87_P020733	CACAGTGAGCAGGACCAGCCTCCCACTGCAGGACATCACAGTGCTAAAAGCGTGTTGCTT	up	1.63235	0.0618973	up	1.54394	0.24827
TMC3	Gallus gallus transmembrane channel-like 3 (Tmc3) mRNA, complete cds. [AY581310]	A_87_P035123	GCGGTACAGAACAGGCTTTTGTGCAGTCATTGTACTTGCTGTCTGAGGTCTCTTAAGAAT	up	1.63225	0.0570281	up	1.5365	0.0615892
RCJMB04_1m8	Gallus gallus mRNA for hypothetical protein, clone 1m8. [AJ719379]	A_87_P037130	CCTTCAATTGTCTCGTTTGGATGATTGTGGTTTTGCTTTTTATTTGAAATAAACTCAATT	up	1.63199	0.00284434	up	1.20157	0.118686
FREQ	Gallus gallus neuronal calcium sensor (NCS-1) mRNA, complete cds. [L27420]	A_87_P009481	GAAGAGGGTGGATCGGATTTTTGCCATGATGGACAAGAACGCAGACGGGAAGCTGACGCT	up	1.6318	0.0354429	up	1.36209	0.1409
AJ451328	AJ451328 riken1 Gallus gallus cDNA clone 28g20r1, mRNA sequence [AJ451328]	A_87_P037308	GCTTCGGGGAGGTTTCCGCGCCTGGAGCCCCGTGCCTTGGATCTAAAGAGGATTAATAAT	up	1.63176	0.356214	up	1.73518	0.333537
ATP11B	Gallus gallus finished cDNA, clone ChEST820g7. [BX950744]	A_87_P021481	TCTAATTATCCTCCTCTTTGAAGCCATTTTGAGTACTATTTTAAAATATGCCTGGCAAGC	up	1.63011	0.401674	up	1.55175	0.49398
BX935715	Gallus gallus finished cDNA, clone ChEST328o1. [BX935715]	A_87_P021983	CCTCATCTTACTGCAGAACTATCAGAACCTGAACTTCACTGGCTTCCGCAAGATCTTGAA	up	1.62979	0.434942	up	1.39906	0.589248
ZZEF1	Gallus gallus finished cDNA, clone ChEST922g4. [CR406899]	A_87_P012450	ATGTGGGCCAGTTCCTGACAAATGTCAGAATGATTTTGCAATCACTTCTATCCCAATATA	up	1.62882	0.0200101	up	1.21261	0.311128
AY234335	Gallus gallus NADH dehydrogenase subunit 5 mRNA, partial cds; mitochondrial gene for mitochondrial product. [AY234335]	A_87_P035230	AAGCCAACACAGCTGCACTACAGGCAATAATCTACAACCGAATCGGAGACATTGGCCTCA	up	1.6286	0.0741663	up	1.2828	0.288603
WASF3	Gallus gallus finished cDNA, clone ChEST403d8. [BX931630]	A_87_P023847	CCTTACAGGGATGATAAGAAAGATGGATTGAAGTTCTATACTGATCCTTCCTACTTTTTT	up	1.62848	0.0471176	up	1.43913	0.107008
NTN1	Chicken netrin-2 mRNA, 3' end. [L34550]	A_87_P009474	GTGAACGGACTCTTCTGTCTATAGTGTATATTTTGGCAACGGTTCCCCTTTTTGTGTGCG	up	1.6278	0.0495005	up	1.35244	0.221587
WHSC1L1	Gallus gallus finished cDNA, clone ChEST883f6. [CR405762]	A_87_P013214	AACGGCAGGGAATTGTTTGAGTCCTCTCTTTGTGGGGACCTTTTAAATGAAGTACAAGCG	up	1.62727	0.120301	up	1.44813	0.307399
BX932749	Gallus gallus finished cDNA, clone ChEST482o5. [BX932749]	A_87_P023381	TTGCAGTATTTTTGATCTGAAGAACTCCCTTCCAGATGCCCTTCTCCCAAACCTACTGGA	up	1.62719	0.00244714	up	1.30125	0.0924594
RCJMB04_18p7	Gallus gallus mRNA for hypothetical protein, clone 18p7. [AJ720491]	A_87_P036373	ACGGCCAGCAGTCTGGGAAACTTGATCCTGTCCATTAAGTGTGAGGAGGTGGATGGCACC	up	1.62568	0.309783	up	1.76877	0.285158
C1QDC1	Gallus gallus finished cDNA, clone ChEST173k22. [BX935623]	A_87_P022037	TCTGTCAAGAAGAAGCCAGAAGAGCCCAAGTCTTGGGAAGCTGAATGTGCTAGAAAACAA	up	1.62545	0.298448	down	1.09044	0.875779
LOC423476	Gallus gallus finished cDNA, clone ChEST641n21. [CR390736]	A_87_P013960	TTGGGAGGCTTGTTTCATCCAAGGCTGTGTCTCTCTTCAGTAAAGAGAACCAAAAGGAGT	up	1.62544	0.4556	up	1.00425	0.996185
LOC396260	Chicken mRNA for avidin. [X05343]	A_87_P008973	GCCAGCAACAATGCCGGAGTGCTGACACTGCTTGTGATATTCCTCCCAATAAAGCTTTGC	up	1.62537	0.00291004	up	1.94401	0.00598267
AI980922	pat.pk0035.f4.f chicken activated T cell cDNA Gallus gallus cDNA clone pat.pk0035.f4.f 5', mRNA sequence [AI980922]	A_87_P037555	ATTTGGTTACATCAAGCAAGGCCCCAGGTCCAGCACAAGTCTAAGAATCATAGCCCCGAA	up	1.6251	0.296236	up	1.4396	0.491046
CN237306	WLB117H03.ab1 WLtestis Gallus gallus cDNA 5', mRNA sequence [CN237306]	A_87_P020442	CATCCAGTGCCCCTGTTACCGGTGCCAAGAAGGCTCGGGTTCATTGAAAGGTCCCACTTT	up	1.62401	0.278514	up	1.44459	0.497903
NFATC3	Gallus gallus finished cDNA, clone ChEST756f3. [CR406370]	A_87_P012825	AGACCTCAGAGGATCAGACTGCTACTTTGTCTGGAAAAATAGATATCTGCCCTGAAGAAC	up	1.62384	0.238874	up	1.53927	0.325386
GARNL1	Gallus gallus finished cDNA, clone ChEST902p10. [BX929992]	A_87_P024489	CAAGAGACTTTGCATAAGCTATCTGAGATTGATACTGAAGAGCAAAATGTGCGAGCTGGA	up	1.6238	0.10903	up	1.50618	0.225654
AB235921	Gallus gallus Edn3 mRNA for endothelin 3, partial cds. [AB235921]	A_87_P038033	TGTTAATGTATGCAGGCCTGAATCATCATATTGTAACTCTGTGGCAGATGTTTAAATAAC	up	1.62286	0.037686	up	1.62418	0.0599544
BX932391	Gallus gallus finished cDNA, clone ChEST94i17. [BX932391]	A_87_P023519	GTAGAGGAACTCTATAGCAAGACGAGGAGGAAAAACAAAAACAAAAGAGAATACTTTTTT	up	1.62226	0.015528	up	1.24866	0.141886
NKTR	Gallus gallus finished cDNA, clone ChEST1027h13. [CR385906]	A_87_P016837	CATCTTCAGAATCTGAGAGTTCTCATTCTAACTCAACACATACCAGAGGACAGTCAAAAA	up	1.62095	0.015528	up	1.25128	0.18654
CN227683	RJB094D01.ab1 RJtestis Gallus gallus cDNA 5', mRNA sequence [CN227683]	A_87_P020710	CTTCCAGGAGGCCAACGACAGCGAGACGCTCACCATGATCATGGACTGCCGCTACACCGT	up	1.61975	0.219311	up	1.49368	0.270178
RCJMB04_5f12	Gallus gallus mRNA for hypothetical protein, clone 5f12. [AJ719692]	A_87_P036920	TGTTATGGCTACCCTTCTTTACCCAGGGAGTGAGTTCACTATTACCCATCAGGAGATGAT	up	1.61964	0.60496	up	1.55318	0.67031
LSS	Gallus gallus mRNA for hypothetical protein, clone 28a24. [AJ720861]	A_87_P036122	GCTTCCATGAGCAAGGTGCGGGTATCAGAGGTGGAAGTCATGTCAACTGATGAATTAATA	up	1.61927	0.00576249	up	1.53245	0.00749696
OPHN1	Gallus gallus finished cDNA, clone ChEST432n22. [CR352810]	A_87_P018350	AAAGAGAGGCACAACTTCTTTGAGTCCTCCCTTGAGTATGTGTACCAGATCCAGGAAGTA	up	1.61898	0.397196	up	1.60075	0.471964
CO421734	GGEZHT1018C01.g HT1 Gallus gallus cDNA clone GGEZHT1018C01, mRNA sequence [CO421734]	A_87_P020325	AGGAGGACTCCAAGCTGAAGGGGAAGTCACCTAAACAGGCAACACCGGGCAAAGTCACCA	up	1.61882	0.320693	up	1.17625	0.763192
RCJMB04_14f14	Gallus gallus mRNA for hypothetical protein, clone 14f14. [AJ720295]	A_87_P036505	AGAAACTACCTTAAGACAGCCATTTACTTACACGATAACTAAGTGGAAAAGCCCAAACAA	up	1.6175	0.0727256	up	1.2992	0.234378
CN229037	RJB066A11.ab1 RJtestis Gallus gallus cDNA 5', mRNA sequence [CN229037]	A_87_P020661	GAAGTTGGAGCCGTTCCTGGTGAGGGTGCAGAAGGAGATGAGAGGAGCAGAGCCCCTCGT	up	1.61674	0.0943799	up	1.50683	0.21257
HPS3	gonad_EST03880 Embryonic gonad cDNA Library Gallus gallus cDNA 5', mRNA sequence [CV856404]	A_87_P010604	TTATCCATGACTGGAGTTTTGGAGCGACGAGCGTCAGAAAGTGATGAAATACAGGCGTAT	up	1.6166	0.147303	up	1.50747	0.178731
NP347247	GB|AB017137.1|BAA32555.1 melanocortin 3-receptor [Gallus gallus] [NP347247]	A_87_P008432	CTGGAGATGAGAAAGACTTTCAAAGAAATAGTTTGTTGCTGCTATGGTGTGAGCGTGGGA	up	1.61598	0.704621	down	1.18836	0.888187
SCD	Chicken mRNA for delta-9 desaturase. [X60465]	A_87_P008898	TCCCATGGTGTATTTACGTGATGTATTAAGACCTGGAGCTCTGCCTTTGTAAAACCAGGC	up	1.6157	0.428718	up	1.78049	0.257356
DN829968	pat.pk0059.g3.f Chicken lymphoid library (pat) Gallus gallus cDNA clone pat.pk0059.g3.f 5', mRNA sequence [DN829968]	A_87_P009752	GTTGCTGTTGCCCCGCACCAAGGGGAACCCATCGGCCACAGGGTGCCAACCCAAATTGTT	up	1.6157	0.520583	up	1.06591	0.941423
LOC395708	G.gallus mRNA for goose-type lysozyme. [X61002]	A_87_P008896	TTTTTTGAACTCCAACTTTTCACACAGATACGTAGACCACACTTGGATTTTTCTGTCAAT	up	1.61517	0.0308596	up	1.69392	0.00796911
CR353761	Gallus gallus finished cDNA, clone ChEST918g23. [CR353761]	A_87_P017735	GGGGTAGAAAGGATATCTTGCCTTTCGACAAGATGAAGGAACAGAGATTGCGAGAACACA	up	1.61484	0.182521	up	1.51064	0.266432
BX932252	Gallus gallus finished cDNA, clone ChEST359e21. [BX932252]	A_87_P023576	GCTTCCCAAAATGCCTTTTGAAGAAATTATATATGATGATGAGAGTGCCTACAAGTGGCT	up	1.61427	0.0320788	up	1.52076	0.090184
RGS4	Gallus gallus finished cDNA, clone ChEST606e8. [BX950639]	A_87_P021537	ATGTTCAGCTGCAAGATGGAGAGCTTCTAATAGTGTGAGCATAGCTGAGCATGTGGCTAT	up	1.61369	0.211661	up	1.27386	0.534835
X97585	G.gallus small nucleolar RNA U36a. [X97585]	A_87_P008775	ATGAATTTCTTCACCTGAATCAACAATGAAGAGCAAAATGAGCTTTTTAACACTGAGCAA	up	1.61367	0.344292	up	1.74151	0.317041
AJ444397	AJ444397 dkfz426 Gallus gallus cDNA clone 41d17r1, mRNA sequence [AJ444397]	A_87_P037351	GGGGACCCCATTGTTGGCCATAGGACCCCATTGGCAGTCATAGAGCCCCTTTGGTGGCCA	up	1.61325	0.322751	up	1.35105	0.582805
SEL1L	Gallus gallus finished cDNA, clone ChEST37m10. [BX933776]	A_87_P022873	CTTCTGTGAAACTGAAGAGCAGTCCAATAAGAGGAGGCAGATGCAAGAAGCTGAGGATAT	up	1.6132	0.21066	up	1.57729	0.259867
CR386909	Gallus gallus finished cDNA, clone ChEST37j11. [CR386909]	A_87_P016170	TCTGTCCTGAAATTTACCTACCCTACCCTTTTTCAAGGATGGCAGACGTTAGTTGGTGGA	up	1.61296	0.125098	up	1.79443	0.0590736
AJ456119	AJ456119 riken1 Gallus gallus cDNA clone 7k15r1, mRNA sequence [AJ456119]	A_87_P037267	GGGTTCAGATGTTTGTTTACTGCCGAACGCTTCTCGGCCATCTCACTTGCACCCTCATCC	up	1.61269	0.0357503	up	1.48531	0.0479223
SLIT1	Gallus gallus Slit1 protein mRNA, partial cds. [AF364044]	A_87_P037663	GCACCAGCTTCCACGGGTGCATCCGCAACCTCTACATCAACAATGAGCTGCAGGACTTCA	up	1.61199	0.233095	up	1.63581	0.216267
ZCCHC14	Gallus gallus finished cDNA, clone ChEST857b20. [BX934668]	A_87_P022482	AAGGAGAAGCCGGTGATGTTACTCAACCATTTCACTTCAAGCTCTGTCAGACCCACTGCT	up	1.61147	0.105653	up	1.08925	0.749821
BG625753	pgn1c.pk003.p8 Normalized chicken lymphoid cDNA library Gallus gallus cDNA clone pgn1c.pk003.p8 5' similar to gb [BG625753]	A_87_P034972	TCACTTGCCAACCTTCAGTTCACCAGCTATTGAAAGCCACATTCATCGTATCAGTGGTCT	up	1.61126	0.0461369	up	1.38609	0.106939
RCJMB04_21h6	Gallus gallus finished cDNA, clone ChEST714c19. [BX934151]	A_87_P022721	AAACTGGAGGAAAGAAGTTCTCCAAGGAGTTTGAAGAAGCAAGCTCAAAGCTGGAAGAGT	up	1.61054	0.034495	up	1.48934	0.0751739
LOC396202	Chicken mRNA for neuronal transmembrane protein Nr-CAM, ng-CAM related. [X58482]	A_87_P008910	TTGTTTGCACTTGTACATCCTCCTTCTCGTACGATGAACATGCAGGTTACAAAGCTCCTC	up	1.61053	0.633481	down	1.61228	0.535881
BX935893	Gallus gallus finished cDNA, clone ChEST163f16. [BX935893]	A_87_P021898	CAGAAAGCTGAAGCTCAAAAGAGGCTGTATGGTCAAGGCTCAATGAAAAGACTGTTGCCA	up	1.61033	0.0644395	up	1.66361	0.0589453
TGFBI	Gallus gallus mRNA for RGD-CAP, complete cds. [AB005553]	A_87_P038218	CTTGCTACCTATGATGGACAAGGGCAGGCGCCTAATTCAGGCCTGATCCAGCAGCACAGA	up	1.60966	0.0682506	up	1.49439	0.150499
RCJMB04_25a7	Gallus gallus mRNA for hypothetical protein, clone 25a7. [AJ720761]	A_87_P036198	AACAATAAGAAGGACAGAGAGGAGACCGTCTCCTGTAGAAAGATCAGAAAATGCACCAAA	up	1.60949	0.172683	up	1.22024	0.609552
C7orf16	Gallus gallus finished cDNA, clone ChEST336o10. [BX929876]	A_87_P024552	ATTTGCCACAGTGACTGACCCAGCATCTTTCATCCCATTCACAGATGTTCAGCTTCAAGA	up	1.60936	0.00507459	up	1.30633	0.0384022
RCJMB04_17p1	Gallus gallus finished cDNA, clone ChEST202o19. [CR385883]	A_87_P016851	TCCGTGGTGAAAAGATCTGTGGAAATGAAGATCGGTGAACCTTCAAGTGCGTTGCAAAGA	up	1.60909	0.193709	up	1.35643	0.421504
RANBP2	Gallus gallus finished cDNA, clone ChEST769n3. [CR406617]	A_87_P012659	AGGACAGCTCAGCTTATACAGAAAGCGGAAGAAATGAAGAGCGGCTTAAAAGACCTCAAA	up	1.60896	0.0119538	up	1.03387	0.923156
CR523601	Gallus gallus finished cDNA, clone ChEST331d20. [CR523601]	A_87_P011505	AAATATTAAGATTTACACATACGTACTGTTGCGCAGTGTGGACCTCATGCCAAAAATTGA	up	1.60849	0.11215	up	1.26091	0.387183
HOX1.4	Chicken Chox-1.4 mRNA for homeodomain protein. [X52670]	A_87_P008936	AACGCTATTAAAGGCTGTGGCTGTTTTCATATTTGGCACCGTCTAAATCGTTTGGGTCCA	up	1.60828	0.00327854	up	1.56328	0.00291167
WNT4	Gallus gallus mRNA for Wnt-4 protein, complete cds. [D31900]	A_87_P009788	AGGGAGAGCACAGCTCTATACAGAGACAGAGCCCCGGAGGAAAACAGATTTTAAAAGAAA	up	1.60801	0.230266	up	1.10759	0.816674
CD215597	pgp2n.pk008.f11 Normalized chicken pituitary [CD215597]	A_87_P021383	CGGTGAAGGCGGTGTTCGACAGCATGGATAACATGGAGGTGTCGCCGCACGACATCGCCT	up	1.60766	0.281928	up	1.77909	0.235678
AM064320	AM064320 Chicken immune 6 - CSEQRBN34 Gallus gallus cDNA clone C0000858I07_T7, mRNA sequence [AM064320]	A_87_P035403	GGCTTCTAGGAGGAGCTATGGAAAACCAAGATATTGCTGCCAATTACAGGGACGAGAATT	up	1.60652	0.0514159	up	1.26109	0.331492
CR354140	Gallus gallus finished cDNA, clone ChEST387h1. [CR354140]	A_87_P017519	AGATGCAGCTTTCCATCTCTTTTGGCTGTACATAAATTATTGCTCCTTGCTTTTTGCACT	up	1.60641	0.682129	up	1.48415	0.771759
CR390340	Gallus gallus finished cDNA, clone ChEST152o10. [CR390340]	A_87_P014221	CAGACGGTCACAGCGAAACGCAATTCTTGTATTGTTCTTTTACAATAGCGTAGTATACCA	up	1.60519	0.00699989	up	1.45548	0.0399817
RAR-GAMMA2	Gallus gallus partial RAR-gamma2 mRNA for retinoic acid receptor. [X73973]	A_87_P008840	CAATGACCGCAATAAGAAGAAGAAGGAGGTGAAGGAGGAGGCGGCCGACAGCCCCGAGCT	up	1.60496	0.0619595	up	1.37843	0.227476
BX931937	Gallus gallus finished cDNA, clone ChEST551o16. [BX931937]	A_87_P023727	AAAGAAACTCCTTTTCACTTCATGAAACACTCACAGCGAAACAGATTTGCTTGTGTTTAG	up	1.60444	0.237717	up	1.64919	0.135793
BX930010	Gallus gallus finished cDNA, clone ChEST902h5. [BX930010]	A_87_P024477	AGAAGGGAGCCTTCATGAAGCCCTGGAAGCCTCGCTGGTTCGTGCTGGATAAAACCAAGC	up	1.60421	0.395907	up	1.53825	0.472243
USP2	Gallus gallus ubiquitin specific protease 46 (ubp46) mRNA, complete cds. [AF064248]	A_87_P037954	GTGCCTTAAACCATTTCAGGGCGCAGGAGGCCCTTGGGGTGCACAGGGATGTCCGTCCTA	up	1.60401	0.110726	up	1.45442	0.159754
CN219464	WLA006G04.ab1 WLbrain Gallus gallus cDNA 5', mRNA sequence [CN219464]	A_87_P020832	AGAAGAGAAGGCTGTGGGGAACCTTACTGTGGTCTTCCAGTAATAAAAGGAGGCCTATTT	up	1.60392	0.00488745	up	1.4334	0.130044
BX935541	Gallus gallus finished cDNA, clone ChEST82p2. [BX935541]	A_87_P022090	TCCTTCTTTGCTCCATTTGATCTTCTCTTGAGGACTGACTTCCCCGTGATGACACAGCCC	up	1.60377	0.56345	up	1.50079	0.656829
LOC423041	Gallus gallus finished cDNA, clone ChEST985d19. [BX929327]	A_87_P024769	TCGCTTCCCAAGAACGACATCCCAGTATCTGTGTAGCATGCAACATGAAAAATGGAAGGT	up	1.6035	0.207335	up	1.67855	0.220597
WNT9A	Gallus gallus wingless-type MMTV integration site family member 9a (WNT9a) mRNA, complete cds. [AY753293]	A_87_P035055	AGGTCCGTTGGTGCTGCTACGTGGAATGCAAGCAGTGCACCCAGAGAGAGGAGGTTTACA	up	1.60297	0.00468389	up	1.41043	0.0351587
RCJMB04_9i11	Gallus gallus mRNA for hypothetical protein, clone 9i11. [AJ720017]	A_87_P036699	AACAGCTGCTCTTCTTGTGCAACCATTTCTCAGCTGTGTGAGTTGGAAATGTCTCAGCTT	up	1.60275	0.00181534	up	1.61227	0.00174027
FLT4	Gallus gallus tyrosine kinase VEGFR-3 (VEGFR3) mRNA, partial cds. [AF041795]	A_87_P037974	TACAAGGACCCTGACTATGTCAGGAAAGGCAGTGCCCGTCTCCCACTGAAGTGGATGGCT	up	1.60237	0.472653	up	1.3057	0.721904
CENTB5	Gallus gallus finished cDNA, clone ChEST491b18. [BX936095]	A_87_P021805	CAGCTGGTGATTGATTCTGCAGTGGAGAAGAGAGAGATGGAGCATAAGCATGCAATGATA	up	1.60235	0.0668368	up	1.6401	0.0441165
LOC427050	Gallus gallus finished cDNA, clone ChEST599a17. [BX932461]	A_87_P023488	CTGCAGGACATTCACAAATATCTCATATTAAATACTTTAAGGTCCTGATTCAAGAGATGG	up	1.60204	0.347249	up	1.10464	0.865511
TTN	Gallus gallus finished cDNA, clone ChEST509a6. [CR385718]	A_87_P016966	TGAGGCAGCGGATGCTGGCCTATGAGGCCATCAGGGAGCTATGGAAAGAAGAAAGGAAGA	up	1.60135	0.0247469	up	1.25192	0.186738
LOC416333	Gallus gallus finished cDNA, clone ChEST570l18. [CR405735]	A_87_P013227	AGAGCGTTTACAGCCACTCTGCACTGCAAGCATCTTCACCGATGGTATTACCTGTTAAAA	up	1.60064	0.442439	up	1.26855	0.766412
FBN1	Gallus gallus fibrillin-1 (fbn1) mRNA, partial cds. [AF300613]	A_87_P037710	AAGTGTCCTCCAGGGTTTTATACAGCTCCTGATGGCTTAAAATGCATAGATGTGCGTCCT	up	1.5995	0.0446336	up	1.4863	0.114648
CV039101	4136407 BARC_3GAL chicken mixed tissue Gallus gallus cDNA clone 3GAL_24M02 5', mRNA sequence [CV039101]	A_87_P010715	TTTTTTCTATAAACATGCAAGCTTTTTCATGCCACCAGGACCAAAGCCAAACAGGCAGAG	up	1.59938	0.0617711	up	1.40951	0.17752
LOC420125	Gallus gallus finished cDNA, clone ChEST605h23. [CR523219]	A_87_P011761	GAGAGCTTTTCACTTTGCCAAAACGTTACAATTTAAAGGCAGCATCGTCTTCAGCTTTTC	up	1.59857	0.00447984	up	1.36653	0.00707699
LOC422450	Gallus gallus finished cDNA, clone ChEST788m3. [CR524442]	A_87_P010895	GTATAACATGTTCAGTGAAGACCCCAACGAACAAGATCTGTACCATGCTACTGCTGCTGT	up	1.59835	0.182512	up	1.67166	0.172804
USP47	Gallus gallus finished cDNA, clone ChEST701i3. [BX931056]	A_87_P024089	ATGTCTAGAATGTGGCTATGAAGGCTGGAGAATCGACACGTACCTGGATATTCCTTTGGT	up	1.59821	0.169804	up	1.74949	0.155877
ALDH1A3	Gallus gallus aldehyde dehydrogenase-6 (ALDH6) mRNA, complete cds. [AF152358]	A_87_P037852	CTGATTAATGGTGGTCGATACTGAAATCATTTGAAGTTCTTACAATCCTAATATTCTGGC	up	1.59793	0.00228847	up	1.4441	0.0214538
BX950513	Gallus gallus finished cDNA, clone ChEST525a3. [BX950513]	A_87_P021604	GCAGATTATGTGCTGGCCATCAATTCCTACGACATCGCTCTCAAAGTCATCAGCTCCAGC	up	1.59765	0.297784	up	1.73353	0.259707
AI981167	pat.pk0043.d4.f chicken activated T cell cDNA Gallus gallus cDNA clone pat.pk0043.d4.f 5', mRNA sequence [AI981167]	A_87_P037552	GAGCTCATTTCCAGGCCCCCAGAAGAGCAGCTCCAGCCCAAGGGCTGACAACACAGAGCT	up	1.59741	0.13911	up	1.09985	0.817697
CV041249	4138989 BARC_3GAL chicken mixed tissue Gallus gallus cDNA clone 3GAL_29L05 5', mRNA sequence [CV041249]	A_87_P010710	GCGGGACTGTTGTGGAGTCACAGCAACAGCAGTCCAAAGGGAGAGCTGGATATGCAAGAC	up	1.59613	0.339493	up	1.0074	0.990879
PI15	Gallus gallus finished cDNA, clone ChEST218f18. [CR385995]	A_87_P016768	CCCTCCAAGCTACGGAGGTTCTTGTACCGACAATCTTTGTTTTCCAGGAGTAACATCAAA	up	1.59332	0.452207	up	1.67698	0.441532
CR390777	Gallus gallus finished cDNA, clone ChEST642j6. [CR390777]	A_87_P013937	CCAATGGGACGGAAAGTTTGCTGTAGCAGGGAGGTGAAAACCGAAGTATTATCGAGTAAT	up	1.59309	0.0424558	up	1.245	0.263165
DBN1	drebrin E2 {alternatively spliced, clone Dcw17} [chickens, embryo, mRNA Partial, 456 nt]. [S65230]	A_87_P009192	CGTGGCCAAGATCGCAGAGTTCTTCCAGGGTGTGGATGTTATCGTCAATGCCAGCAGCGT	up	1.59306	0.384373	down	1.13843	0.83984
CR407445	Gallus gallus finished cDNA, clone ChEST786d23. [CR407445]	A_87_P012065	CGATGGTGGATACTTTCTTACACTGGTTTTAGTCTGCATGTGTTAAAAGATTTTTACAAG	up	1.59244	0.00348384	up	1.65173	0.0244043
LOC416951	Gallus gallus finished cDNA, clone ChEST898k7. [CR523033]	A_87_P011887	AATGCCACATCTGACAGCACTGCCTCAGCAGAACAAGCACTGAAAACAAAGGAAGCATTA	up	1.59244	0.0770177	up	1.64113	0.115703
ACE	Gallus gallus angiotensin converting enzyme (ACE) mRNA, 3' end of cds. [L40175]	A_87_P009461	TGATTTGCCCACTGCTGGGCTGTTCATTTGCATGGATGAGAAATAAACCCACGTCTTGTT	up	1.59112	0.417077	up	1.50142	0.511445
ART1	Gallus gallus GPI-anchored ADP-ribosyltransferase (ART7.1) mRNA, complete cds. [AY772192]	A_87_P035049	TCACCCCCTCCTCCTTCAAAAGGGAAGTCGCTGAATCTTTTGGCCTGGACACGTTCTTCT	up	1.58945	0.0532297	up	1.48408	0.236623
BX933108	Gallus gallus finished cDNA, clone ChEST908a4. [BX933108]	A_87_P023198	TCTGGATCCTGGAGAACTATTACCACGATTTCCCAGTCTACAATCCTGCCCTCCTCAACC	up	1.5893	0.554908	up	1.46693	0.656965
CR385276	Gallus gallus finished cDNA, clone ChEST548e12. [CR385276]	A_87_P017226	GAAGTTGCTCCTTTTACAGCTAAAATGAAGGCACTGGAGGGAGAGAGAGAGAACTATTCC	up	1.58922	0.101272	up	1.26787	0.456911
POPDC3	Gallus gallus popeye protein 3 (Pop3) mRNA, complete cds. [AF204170]	A_87_P037788	GTTCTTCTTTTTGAAGAACTGGAAGAGTTTGAAGTGCTCGAATTCTTCTAACAAAGAAAC	up	1.58893	0.0517357	up	1.71891	0.0664093
LOC422609	Gallus gallus finished cDNA, clone ChEST965n6. [BX934425]	A_87_P022593	TCTTTCCTGCTGTCCCTGTCAGATATTTTGCATGTGACACAGCAGAGAAGCCATGAAGAA	up	1.58828	0.219156	up	1.41508	0.347691
CR524218	Gallus gallus finished cDNA, clone ChEST995b3. [CR524218]	A_87_P011048	AAGCCACTAAGTCTGCAGTTGCTATTCTCTACGAACCAAGGTTTGGTTGTCCCCAAACAA	up	1.58827	0.357843	up	1.39418	0.521485
SIX3	Gallus gallus sine oculis related homeobox 3 mRNA, complete cds. [AY373324]	A_87_P035184	ACGAAGAGTTGTCAATGTTTCAGCTGCCCACGCTCAACTTCTCCCCGGAGCAAGTGGCCA	up	1.58825	0.402522	up	1.00952	0.983943
RCJMB04_24e12	Chicken mRNA for enolase alpha, complete cds. [D37900]	A_87_P009786	AGAGGTACCTGCAAACAGAAATAGTAGTGTTTTTACATGTGACAAATAAAAGCATCCAAC	up	1.58797	0.014252	up	1.3288	0.0471294
AI982183	pat.pk0076.f10.f chicken activated T cell cDNA Gallus gallus cDNA clone pat.pk0076.f10.f 5', mRNA sequence [AI982183]	A_87_P037544	AGGGGAAAGGCACTGACTCACCCATTGCACCGTGAGTCAGCAGCGGGACTGGGACAGGAA	up	1.58792	0.370667	up	1.66477	0.340021
BX932500	Gallus gallus finished cDNA, clone ChEST636m17. [BX932500]	A_87_P023468	GCAGTAATGCAGACAAATCTGATGTGGGGTTCAACAGTGAAGCAGCCAGAAAACGAAACT	up	1.58703	0.651618	down	1.07682	0.553468
ST3GAL1	G.gallus mRNA for Gal beta 1,3 GalNAc - alpha 2,3-sialyltransferase. [X80503]	A_87_P008816	TTGCCGGAGTAGTAACTGTTTCTACCATTGCCACATTCTGCATTGATGGCATCTAGAAAA	up	1.58676	0.00956802	up	1.32618	0.0404471
Ndown153	Gallus gallus finished cDNA, clone ChEST564e13. [CR385932]	A_87_P016819	CGAGTGTCACAGGAAGTTTTAAATTTGGAGAACAAGGGGGCTTCAAGTTTGGCATTGCAT	up	1.58653	0.197247	down	1.04105	0.921075
CV859296	gonad_EST06772 Embryonic gonad cDNA Library Gallus gallus cDNA 5', mRNA sequence [CV859296]	A_87_P010456	CATTACATGTGTATATGGCACCTTGTGGTCCTGATTCTTCAAGCCAAAACTTGCAGGAGT	up	1.58613	0.634866	down	1.18221	0.911731
ACSL1	Gallus gallus mRNA for hypothetical protein, clone 3m22. [AJ851480]	A_87_P035745	TGACACCAACACTGAAGGCAAGAGACCAGAACTACGGAAATTTTTCCAGTCGCAGATAGA	up	1.58583	0.00235839	up	1.49727	0.00165931
CD216054	pgp2n.pk009.n1 Normalized chicken pituitary [CD216054]	A_87_P021378	CCTTCTACGACATCGACTTCTTGTGCAAGACGGAGAAGTCGCTGACCAACCTCAGCAGCA	up	1.58431	0.300553	up	1.67041	0.284362
MYCBP2	Gallus gallus finished cDNA, clone ChEST235f2. [CR353703]	A_87_P017771	TCTACCCAGTGGTAGTGCGTTACAGCAAATGGCTTTAAGGTGCTGGAGTCTCAAATTCAA	up	1.58375	0.331621	up	1.44021	0.501416
ANKRD1	Gallus gallus carp mRNA for cardiac ankyrin repeat protein, complete cds. [AB082935]	A_87_P038118	ACTGAACAGGCACATTTCCACTGCTTCTTTATTTGGTTAGAACCTTATTTTGGAGGCAAG	up	1.58344	0.00176794	up	1.53025	0.00847474
CB018145	pgn1c.pk019.e19 Chicken lymphoid cDNA library (pgn1c) Gallus gallus cDNA clone pgn1c.pk019.e19 5' similar to emb [CB018145]	A_87_P021401	TCCATCCCCCATTGCAGAAGAGCAGAATGCAGGTATGAAAGATATGAATATGGAGGAGAA	up	1.58321	0.362774	up	1.12599	0.846219
RCJMB04_3a6	Gallus gallus mRNA for hypothetical protein, clone 3a6. [AJ851441]	A_87_P035774	CTCTCCTTCTATCACCCTACATTCCAGCATCTTACCTTCATATGCAGTAAAAGAAAGAAA	up	1.58295	0.245143	up	1.70741	0.23143
CR385227	Gallus gallus finished cDNA, clone ChEST552e5. [CR385227]	A_87_P017262	ATTTTACGAGGACTTGAACGGCCGTCAGTATGTGAACGAAGTGTTCAACTTCAGTGTGGA	up	1.58286	0.10359	up	1.40573	0.171744
RCJMB04_11n22	Gallus gallus mRNA for hypothetical protein, clone 11n22. [AJ720164]	A_87_P036594	CTTAGTTCTGACCTTTCTTCCCCATAACTGTTTTGAGATGAACTCTTCAAATAGAACTGT	up	1.58283	0.181308	up	1.64075	0.169944
CR407187	Gallus gallus finished cDNA, clone ChEST800m1. [CR407187]	A_87_P012243	CCATCAGAGGAAATGATAGAACTTGAAAAGGAAAGAAGGGAACTCATTAAAAGCCAGGCT	up	1.58195	0.212525	up	1.59282	0.167996
LOC416593	Gallus gallus finished cDNA, clone ChEST963g3. [BX930653]	A_87_P024215	ATGTTATCATTGTTCTTCACAAAAGTGTTCTGTGAGACATTATAAGCAAACTTGTCCGTG	up	1.58159	0.183813	up	1.46599	0.266623
AJ443980	AJ443980 dkfz426 Gallus gallus cDNA clone 39d14r1, mRNA sequence [AJ443980]	A_87_P037357	TCCTTGGTCAACTGAATGACTTTCTTGGCCCCGTTGCCTAATCTTTATTAACTTCATAAT	up	1.58046	0.593131	down	1.09358	0.906409
WDTC1	Gallus gallus finished cDNA, clone ChEST257n16. [BX931272]	A_87_P023988	CGAGAGAACAGCAAGCGTTCAGAAGTCCTCATAGACCTGACCGAGTACTGTGGGCAGCTG	up	1.57961	0.0244783	up	1.5855	0.0417043
BX929654	Gallus gallus finished cDNA, clone ChEST550b12. [BX929654]	A_87_P024644	AGATCTCAGCTCAGGAGCTGAAGTCTACCTTAAATGCCACCCAGTCTCAAGAAAAGTTGA	up	1.57957	0.00549325	up	1.2839	0.299329
RARB	Chicken mRNA for retinoic acid binding protein beta isoform. [X56674]	A_87_P008918	ATGGTGCAATAAGACATTTTCCAGCTACTTCAGACATTCCTAACACCTTATGTACAGGGA	up	1.57954	0.0113037	up	1.47959	0.0476448
NARG2	Gallus gallus finished cDNA, clone ChEST479l1. [CR389722]	A_87_P014634	GTTACATGAGATCATGACCATCATGGGAGGAAAATTTAACACGCAATTGACCTTTAAGCC	up	1.57872	0.418527	up	1.43679	0.538305
LRRC54	Gallus gallus C-TSK mRNA for Tsukushi, complete cds. [AB100033]	A_87_P038099	CCACCCAAAAATAAGACCATACGACTGAGAGTGTTGTCCATACACTTCTTGAACTGTGGC	up	1.57859	0.0989063	up	1.56774	0.058967
CD218745	pgr1n.pk007.n7 Normalized chicken reproductive tract cDNA library (pgr1n) Gallus gallus cDNA clone pgr1n.pk007.n7 5' similar to ref [CD218745]	A_87_P021346	CACAGCGCTGCAGAATGGGTTTTACCCTGCACCTTATGGCCTGGCCCCTAACAGGATGAT	up	1.57841	0.0408496	up	1.38109	0.160584
SYNJ1	Gallus gallus finished cDNA, clone ChEST986h3. [CR523477]	A_87_P011583	GTGCAGTAGCAATTCGGATGCTGTTTCATACATCCAGTCTTTGCTTTGTCTGCAGCCATT	up	1.57826	0.401917	up	1.40355	0.564216
CR352410	Gallus gallus finished cDNA, clone ChEST82g17. [CR352410]	A_87_P018616	TACCTATTCGTCCTGGATCTACCTGCACAACACAACCGTCGCCCTCAAGAACTGGGCCCT	up	1.57808	0.0252351	up	1.32459	0.159032
RCJMB04_1m13	Gallus gallus mRNA for hypothetical protein, clone 1m13. [AJ719382]	A_87_P037128	GAAAATTCAATCTCAGTCTTCTGTACTTTAGAAGAAAACGACTACGTTTGCACTGAAGAA	up	1.57793	0.0611307	up	1.24428	0.242854
HERC2	Gallus gallus finished cDNA, clone ChEST847f22. [CR388645]	A_87_P015331	GTGTGCAATGATCTCTCCATAATGTCTAAGTTTAAACTTCTGAGTTCTTTGCCCAGATGG	up	1.57759	0.0301459	up	1.20021	0.286159
BI066450	pgf1n.pk008.d12 normalized chicken fat cDNA library Gallus gallus cDNA clone pgf1n.pk008.d12 5' similar to dbj [BI066450]	A_87_P034934	TGGCCCCCAGCGAGAAGGAGATCATGAAGGAGCTGATGGAGAACGGCCCTGTGCAAGCCA	up	1.57752	0.00731265	up	1.12661	0.558498
EPHA3	Chicken eph-related receptor tyrosine kinase (Cek4) mRNA, complete cds. [M68514]	A_87_P009307	AATAGGAGCGAACTTGTTTTCTATCTGTTAATCCTGAAGGGTGGGTGCTCTTAACTGACT	up	1.57683	0.00794844	up	1.27728	0.0675888
HIF1A	Gallus gallus mRNA for hypoxia-inducible factor-1 alpha, complete cds. [AB013746]	A_87_P038201	ACTATGCTTGTAGAAGTGAATGAAGATAAGACTGAACTGCAGTACACTGTAGCTGTTTGC	up	1.57566	0.0113047	up	1.3299	0.101977
CR389590	Gallus gallus finished cDNA, clone ChEST859p24. [CR389590]	A_87_P014724	TACAAGTCTGAACTTGAATTTTAGGCAGTATTGGATCTTTGTTGCAGTATATTTCCACTC	up	1.57531	0.00348632	up	1.29361	0.162109
CV862518	gonad_EST09994 Embryonic gonad cDNA Library Gallus gallus cDNA 5', mRNA sequence [CV862518]	A_87_P009895	TTCAGGCACGATAACAAAGAGGCGATGGAGATCCGCAAACGATGTGCCTTGGTGGCCCTG	up	1.57492	0.502418	up	1.70588	0.677919
AJ454011	AJ454011 riken1 Gallus gallus cDNA clone 37b11r1, mRNA sequence [AJ454011]	A_87_P037290	TGTGCCCTTTCTTTGGAGCTTGCATTAACTTGGAATGTGGATCCCACACACACCAAGCCG	up	1.57475	0.604118	up	2.27089	0.233506
CN227583	RJB091E11.ab1 RJtestis Gallus gallus cDNA 5', mRNA sequence [CN227583]	A_87_P020717	GAGGACTTGTCTGATTCAGCCTTTGCTGCTCGGCACAGCAAATGCGAGGAGATGGAGCGA	up	1.57464	0.0407541	up	1.55165	0.0404471
TRMT12	Gallus gallus finished cDNA, clone ChEST425o6. [CR386777]	A_87_P016248	AGGGCTGGATGAACCTCAGCATTTGTGCTGGGCTTTGTTTCGATGAGTCAGGTGCAGGCT	up	1.57444	0.00491326	up	1.26614	0.0148801
BX935438	Gallus gallus finished cDNA, clone ChEST249i8. [BX935438]	A_87_P022148	CTGCTTATACCTAATGAGCAATTGTATGTGATCAAAGGAGAAAACACCTCTTTTGGTGTG	up	1.57383	0.0452683	up	1.25677	0.31622
LOC423368	Gallus gallus finished cDNA, clone ChEST938c8. [CR523866]	A_87_P011316	AAGCTCTCAGATTCCACGTTTCTCTTACCCTCACGACCAGCTCAAAGAGGATTTCACGCT	up	1.57322	0.164071	up	1.50963	0.220664
AM071296	AM071296 Chicken immune 5 - CSEQRBN30 Gallus gallus cDNA clone C0000853P02_T7, mRNA sequence [AM071296]	A_87_P035347	TTACATATTGAAAAGGCAAAAAGAAACACAAGGATTTGAAAGCTGCCCTCAGTCCCCAGG	up	1.57255	0.459415	up	1.47976	0.571773
AJ443533	AJ443533 dkfz426 Gallus gallus cDNA clone 35p1r1, mRNA sequence [AJ443533]	A_87_P037368	GGATCGATGTGTGGAACCCCGCCTTTGACGTCACACCCCACGAGTTGATCACGGGGGGAA	up	1.57145	0.211606	up	1.55602	0.236293
BX935030	Gallus gallus finished cDNA, clone ChEST301l21. [BX935030]	A_87_P022301	ACCAGTGCAATGTGGCATTGCTCTAGGACCTGAATTAACAAAGGGTGGAATATCTCCAGT	up	1.57036	0.237275	up	1.42804	0.361155
CR391696	Gallus gallus finished cDNA, clone ChEST213a4. [CR391696]	A_87_P013283	TTGCCAGAAGCAAGATTCCAAGAAAGTTTAAGCTGATGGGGGATGATCCTAAAGAGGAAG	up	1.57029	0.107831	up	1.50426	0.180651
ZNF236	Gallus gallus finished cDNA, clone ChEST333c11. [CR386520]	A_87_P016424	ATCAGGCTGACTCTAATAATGCAGAACAAGATAAGGAACAAGAGAGTACAGATAAACTGG	up	1.56989	0.118115	up	1.34114	0.345179
HERC2	Gallus gallus finished cDNA, clone ChEST537l17. [CR387749]	A_87_P015597	CCACTTCCAGTTGTGGCTTTTAACGTAAACAACTTGCCTTTCACTGAACCCATGTTATCC	up	1.56983	0.0193026	up	1.11539	0.370397
AM066726	AM066726 Chicken immune 2 - CSEQRBN29 Gallus gallus cDNA clone C0000645G1_T7, mRNA sequence [AM066726]	A_87_P035383	TGACCCCCACAAAATCCTTGGATGCTCTGTGCTCCTCGTTGGCCCCCGTTGGCTTCCAGC	up	1.56933	0.0924522	up	1.28903	0.368745
9430041O17RIK	Gallus gallus finished cDNA, clone ChEST472k12. [BX932747]	A_87_P023383	CGCTGAATGGAGACATTAGCAGTTCATCTCTTACAGCAAAAGGTTTTAGAAGTGTGCGGC	up	1.56851	0.355612	up	1.64405	0.388505
LOC422525	Gallus gallus finished cDNA, clone ChEST937p7. [CR390173]	A_87_P014327	CCCTCTTCCCTGTGTGGGAGAATTGCGTGAATTAGACAAGAAACACCCGAAACATGTTTT	up	1.56844	0.012969	up	1.28675	0.122546
AF098472	Gallus gallus cadherin mRNA, partial cds. [AF098472]	A_87_P037902	ATGTGTCTCCAGACCTTCCCTTTCAGCTGCGCAAGGATTACGAGCACCAGTACTCGCTGC	up	1.56835	0.586346	up	1.11927	0.888187
HOOK1	Gallus gallus mRNA for hypothetical protein, clone 21h9. [AJ720607]	A_87_P036294	TAGTTGACCTGTATAACAGGAGGCAGGCTTTGTCATCTCAAGTCAGAGACACAATTATGC	up	1.56833	0.00264423	up	1.608	0.00619981
MDK	Chicken heparin binding protein (RI-HB) mRNA sequence. [M61754]	A_87_P009319	TGCTGAATGTGAGGAGGTGGTCTATGTGAGCAAGCCCTGCACCGCCAAGATGAAGGCCAA	up	1.56761	0.0025313	up	1.38389	0.00690575
LOC417981	Gallus gallus finished cDNA, clone ChEST371g7. [BX930713]	A_87_P024198	TGCAACGTTGCTGACCAGTGGTTTTGCAAGGTGTTAATGCTGTTGTTCATGCTGGTAGAA	up	1.56594	0.455257	up	1.49502	0.53198
BX932746	Gallus gallus finished cDNA, clone ChEST482h8. [BX932746]	A_87_P023384	TGAAGTTTTCAGACTGGTCAAGATCAGATTCCTAATAGAGGATATAAATGACAATGCCCC	up	1.56531	0.0979783	up	1.55484	0.117324
CO421993	GGEZHT1005C11.g HT1 Gallus gallus cDNA clone GGEZHT1005C11, mRNA sequence [CO421993]	A_87_P020318	ACAAAACAGATGCCACCAGTCGCATACAGGCTTTGAGATCACTGTCTGGTACTCCAAAAT	up	1.56515	0.0301683	up	1.3909	0.0916077
XPO5	Gallus gallus finished cDNA, clone ChEST46c1. [BX934402]	A_87_P022607	AAGAGACTTTGCCAAGTGTTGTGTGCACTGGGCAGCCAGCTGTGTGCATTGCTAGGTTCA	up	1.56493	0.108435	up	1.42533	0.227822
RCJMB04_8a18	Gallus gallus mRNA for hypothetical protein, clone 8a18. [AJ851576]	A_87_P035678	CGGTGCCCCCAGAGCTGTAAATACTGTACAGCCCTGCCCTTTAAATTATTCCCCCCGGGA	up	1.56431	0.0320788	up	1.32279	0.207597
MLL3	Gallus gallus finished cDNA, clone ChEST202a6. [CR733145]	A_87_P010813	GCAAAAAACTCAGAGAACAAAGAGTCGGTTTCATCTTTGCCACAGTCACCAATGAAGGAG	up	1.56421	0.408131	down	1.03375	0.982237
IL10	Gallus gallus mRNA for interleukin-10 (IL-10 gene). [AJ621254]	A_87_P037221	GCCATGGGGGAGTTCGACATCTTCATCAACTACATCGAGGAGTACCTGCTGATGAGGAGG	up	1.56401	0.244122	up	1.41264	0.377318
LOC415465	Gallus gallus finished cDNA, clone ChEST188e12. [BX929295]	A_87_P024780	TGGAGCTTGCCCCAAAAAGTACTAGATGGTACTCGCTGCAATAACGGAATCACTGGATAT	up	1.56347	0.0875025	up	1.37728	0.220597
M15889	Chicken tropoelastin mRNA, complete cds. [M15889]	A_87_P009399	TGGCTGCGCACAAGGGAAATACTGTGGGAGGAAGCGGAAGTAACCGCCCACCATCACCGA	up	1.5633	0.0165757	up	1.26876	0.159565
B4GALT1	Gallus gallus beta-1,4-galactosyltransferase (CKI) mRNA, complete cds. [U19890]	A_87_P009130	GAAGGTTCTTAAGAACGACATTCTGCTTGCAAGGTCATGTGTGAAACTTGAACTCACTTA	up	1.56322	0.323474	up	1.5169	0.402108
BX934441	Gallus gallus finished cDNA, clone ChEST369d21. [BX934441]	A_87_P022587	ACCCGCCGTATTTTGGGATTAAGTAAAGACAATTCTGTATCTACAAACATAACAGCAATA	up	1.56311	0.163171	up	2.21974	0.0507662
ARHGEF10L	Gallus gallus finished cDNA, clone ChEST1019c3. [CR405993]	A_87_P013063	TTGTCTCACCAAACCTGCCTTCCTTGACTTCCTTAAGAAGCGGCAGATGGCCAGCACCGA	up	1.56265	0.628325	up	1.55458	0.686107
ZDHHC5	Gallus gallus chromosome 5 membrane-associated DHHC5a zinc finger protein mRNA, complete cds, alternatively spliced. [AY871206]	A_87_P035034	GATGACTTCCGAGCCCCGCTTTATAAGACAGTGGAGATCAAGGGCATCCAGGTGCGCATG	up	1.56202	0.114654	up	1.319	0.288603
BI394592	pgp1n.pk002.k3 Normalized Chicken Pituitary [BI394592]	A_87_P034904	GAGCCCCTTGGCATGAGTTAAGCACCAGCGATGGACACCAAACACTTCCTGCCACTGGAT	up	1.56176	0.502797	up	1.09932	0.90578
MYOD1	Chicken CMD1 mRNA for mouse MyoD1 homologue. [X16189]	A_87_P008950	TGGTGTGACAGATCCTTCTCCTTATTACCCCTGTTCTGCCAAAATAAGGTTGTGGACCAT	up	1.56055	0.00603425	up	1.61626	0.0147563
PROP1	Gallus gallus prop-1 mRNA for Pit-1, partial cds. [AB037110]	A_87_P038165	TGTCTCCGGCCACCTTCTCTGGCTTCTTGTCAGAGTCCTCTCCTTACCCCTACACCTATA	up	1.56042	0.508638	down	1.06995	0.90288
POPDC2	Gallus gallus popeye domain containing protein 2 isoform A/B mRNA, complete cds, alternatively spliced. [AY427076]	A_87_P035169	TTACCAGGGTCATTTATGGACTATGTGAGCGAAGCCTCTGAGAACCTCCGGAGCCACCTT	up	1.5595	0.191357	up	1.56285	0.221587
PRRG1	Gallus gallus finished cDNA, clone ChEST941c16. [BX936218]	A_87_P021760	CCACTGGTGAAATCAGTCTGAGAAGAAGTGAAGTTGAACAACATTTAGATCCACCCCCAC	up	1.55946	0.0225113	up	1.44013	0.0338303
RCJMB04_6l3	Gallus gallus finished cDNA, clone ChEST663n20. [CR390557]	A_87_P014073	GTTCGCAGATCCTCATTCAGAATGGCAGTGAGATTGACTGTGCTGACAAATACGGCAATA	up	1.55937	0.208742	up	1.24944	0.536255
GREM1	Gallus gallus finished cDNA, clone ChEST526i23. [CR733243]	A_87_P010784	CTTGAACTAGCAAAGCTTTGGGGCTGGATGAAACTGAAAGGAACCCAGTGAATCACCTAA	up	1.55826	0.015005	down	2.64515	0.699746
LOC419384	Gallus gallus finished cDNA, clone ChEST60g8. [CR406495]	A_87_P012743	CAGTACTGAATTTCAGAAGCAGGGGAGAGATACTATAACCAGAAGTGCTCATGAGGTTAC	up	1.55824	0.00593272	up	1.27505	0.307399
BQ037134	pgn1c.pk005.e15 normalized chicken lymphoid cDNA library Gallus gallus cDNA clone pgn1c.pk005.e15 5' similar to emb [BQ037134]	A_87_P034828	GCACTCGAGCAGATGCCATGATGGCACTGTCACTGTGCTGCCGAGTGAGGATGAGCCCCA	up	1.55815	0.0384355	up	1.09016	0.607148
PSKH1	Gallus gallus finished cDNA, clone ChEST916a14. [BX935768]	A_87_P021951	ATGGAAACAGAATGGCTCTGCATGTGCGCACGTAGCACGTACACACGTGTGGGTGGGTGT	up	1.55803	0.225161	up	1.39085	0.386214
AJ719575	Gallus gallus mRNA for hypothetical protein, clone 3m14. [AJ719575]	A_87_P036999	ATGACTTACCCAGAAGGAGCTCCACTTTCTGAACACGAGTATCCCCCTGCTAGTTTATTT	up	1.55741	0.501429	up	1.43896	0.654965
STMN3	Gallus gallus neuroplasticin-2 (NPC2) mRNA, complete cds. [AF076982]	A_87_P037930	TGAAGCAGCTGGATAAGAGGGCATCGGGCCAGAGCTTCGAGGTGATCCTGAAGTCTCCTT	up	1.55717	0.0638588	up	1.75018	0.0310793
LOC416286	Gallus gallus finished cDNA, clone ChEST709d24. [CR389798]	A_87_P014584	ATGCAGCAAACTCATCTAAAGATGGCCAACCAACAGTTTGCTCAAGGAATGCCTCAGGTA	up	1.55607	0.129787	up	1.57123	0.161491
LOC419518	Gallus gallus mRNA for hypothetical protein, clone 6c24. [AJ719760]	A_87_P036876	CTTTTGCTGGGTTTGAGCCCCTGGATCCAGGGAATCTAATGGTGTCCAACTCAATTTTTA	up	1.5559	0.0452285	up	1.40125	0.14457
AM067361	AM067361 Chicken immune 3 - CSEQRBN33 Gallus gallus cDNA clone C0000474C09_T7, mRNA sequence [AM067361]	A_87_P035370	GGGATCTTAGGCTCTTTTAGAAGCTTTCTCAGCTTCCTGATGGATTGGACTGCCAAAAAA	up	1.55581	0.371878	up	1.27512	0.690223
RCJMB04_15f15	Gallus gallus mRNA for hypothetical protein, clone 15f15. [AJ720326]	A_87_P036487	GCTGGAGCTTTATGAGGATAACATACAGTATGTTGAGATAAGAGCTATCCTGCCTGCGGT	up	1.55558	0.561453	up	1.27659	0.679449
RHOBTB2	Gallus gallus clone 2 truncated TvbR (tvb) mRNA, tvb-r allele, complete cds. [AF507017]	A_87_P037581	AAGACGAGTACACCGAGTATCCAAATGACTTTCCCAAGTGCCTGGGCTGCCGGACGTGTA	up	1.5553	0.244655	up	1.50282	0.222002
LOC427227	Gallus gallus finished cDNA, clone ChEST601g1. [CR385399]	A_87_P017152	AGTTTGTCAGAGAGTCGTTTAGTAAAAAGGTCAGAAATGACCAATGAGTTCATTAAACAG	up	1.55516	0.212399	up	1.12862	0.739908
SH3BGR	Gallus gallus finished cDNA, clone ChEST862i9. [CR406302]	A_87_P012872	TCATGCCTGTGTACATGTGAACATATAAATACAGAACAACAAAGATACCACTGTATCCTA	up	1.55509	0.0941104	up	1.74748	0.0954007
CR385746	Gallus gallus finished cDNA, clone ChEST512p15. [CR385746]	A_87_P016952	CGGAAGGACTGGGTGCCTGGTCTTGTGCCTTTTGTACCTCAGAAGTTTTAGATGTTAAAT	up	1.555	0.00184732	up	1.31501	0.0353887
RCJMB04_3j11	Gallus gallus mRNA for hypothetical protein, clone 3j11. [AJ851462]	A_87_P035759	ATGAGTAAACATAATAGGTAGAGAGGGTCTTTGTGGTAATCCAGGATTGAGGCTGGCTGG	up	1.55482	0.0665421	up	1.34417	0.192957
ZP3	Gallus gallus mRNA for ZPC, complete cds. [D89097]	A_87_P009761	CCTTCAATAAAGCCAGAAACACCTGGGTGCCAGTGGAAGGCAGCCGGGATGTCTGCAACT	up	1.55442	0.335759	up	1.28435	0.593972
ADIPOR2	Gallus gallus mRNA for hypothetical protein, clone 2a16. [AJ719411]	A_87_P037108	AGAGGACCCTTTCCAAATCGGCTTCTGTTCAATGCCATATTTATTTGTAGAAGTGGGGAG	up	1.55413	0.0187339	up	1.30249	0.246597
RCJMB04_32c7	Gallus gallus mRNA for hypothetical protein, clone 32c7. [AJ721001]	A_87_P036014	TCACTCAGCAGGCTTTACAACTGACGTTGCAATAAGGGGCCCTGGCAATAGAATTTTACT	up	1.55409	0.00118471	up	1.71442	0.00510926
LYZ	Gallus gallus finished cDNA, clone ChEST627d18. [CR390743]	A_87_P013956	GGCCGCTTTGCGAGCGCGACGCTACCCGCTTGGCAGTTTTAAACGCATCCCTCATTAAAA	up	1.5535	0.0296117	up	1.03137	0.874489
CCDC45	Gallus gallus finished cDNA, clone ChEST753k14. [BX929584]	A_87_P024668	AGAAGCTGTATCTCGGGAACGCCAAGAAATCCAAACCAGAGAGAAAGCACAAACACAGAT	up	1.55329	0.14948	up	1.3971	0.331239
CR524374	Gallus gallus finished cDNA, clone ChEST492m7. [CR524374]	A_87_P010944	AGTTCCCAAGAACACAAAATTCAATCCCAAAACTAGAAGGGAAATTCGGAACATTGAGTG	up	1.55326	0.342531	up	1.21522	0.714493
NAPG	Gallus gallus finished cDNA, clone ChEST153f7. [BX934869]	A_87_P022368	GTGATATTGAGCGTATCCAAAGGTACCAGATTTACCAGAGCTTCATTGCAATTGTGATAT	up	1.55312	0.0268543	up	1.11695	0.619287
BX935167	Gallus gallus finished cDNA, clone ChEST533c24. [BX935167]	A_87_P022233	TTGCATTCTCACCATCATGTCCTATGACCGCTATGTTGCCATCTGCAAGCCCCTGCACTA	up	1.55293	0.570188	up	1.50733	0.643887
CKAP5	Gallus gallus finished cDNA, clone ChEST65e9. [CR385807]	A_87_P016909	GAAGTGGAACTTCACTACTCCTCGTGATGAATACATTGAACAGCTGAAAACTCAGATGTC	up	1.55254	0.269716	up	1.67565	0.234378
ADORA1	Gallus gallus A1 adenosine receptor mRNA, complete cds. [U28380]	A_87_P009107	CAGCCTTCCTGCAGATCTGGAACCAGTATTTCTGCTGCAAAACCAACAAAAGCAGCAGCA	up	1.55224	0.0227282	up	1.43414	0.00847474
RCJMB04_8m13	Gallus gallus mRNA for hypothetical protein, clone 8m13. [AJ719959]	A_87_P036739	ACACCACCCTCTTCCAGAATATGGATGGCAAAGAGCTCTGCAAAATGAACAAGGATGACT	up	1.55148	0.387299	up	1.64172	0.360717
MRPS18C	Gallus gallus finished cDNA, clone ChEST992e12. [BX932991]	A_87_P023247	TACTTGGATTTATGCCAGTTATGTTTAAGAACCCATCATTTCTTACAGACCCCAAGATTT	up	1.55108	0.736061	up	1.54861	0.761586
U85490	Gallus gallus brain alpha-tubulin mRNA, 3'-untranslated region. [U85490]	A_87_P009004	ATTTTGATACATTGGTGGAGTGCATTTACAGCAGTTCAGATACAAAAGATGTGCTGTACT	up	1.55018	0.19861	up	1.49367	0.288995
LOC415878	Gallus gallus finished cDNA, clone ChEST138h22. [CR407479]	A_87_P012044	AGATGTCTGCCAAAGTAGCTTTGGTGGAAGCAGATTCTGGGGCTGCAGTCTGGGTGCCAG	up	1.54973	0.0161847	up	1.20123	0.180048
BX930046	Gallus gallus finished cDNA, clone ChEST979o22. [BX930046]	A_87_P024464	AAGCCAACACTCGTCTCTTGCTGGGGATGAGCCTGGACTCCTATGCTCGCTATCTGCTAG	up	1.54951	0.00403927	up	1.33733	0.00720756
LOC421889	Gallus gallus finished cDNA, clone ChEST222d1. [BX931990]	A_87_P023704	AGACCACAGAGTACTTTTGGGCCTTTTTCTCTGCTGAGAAGGAATACACGTGTTATCTAA	up	1.54941	0.374384	up	1.68002	0.296615
GABRB3	Chicken mRNA for GABA-A receptor beta-3 subunit. [X54243]	A_87_P008926	TTTTTCCCCCTCATGAATGGGCATTGTTTTTAATGGTCTCTTGCTTTCTCTTCTGCAGTA	up	1.5493	0.541663	up	1.45881	0.650928
RCJMB04_27e12	Gallus gallus mRNA for hypothetical protein, clone 27e12. [AJ720832]	A_87_P036146	ATAGCTAGTCGGTATATCCTTTTTTAAACGAAAAGCTTTATTGCTCTCCAAATAAGCTCG	up	1.54899	0.00956802	up	1.59305	0.0316217
CR388937	Gallus gallus finished cDNA, clone ChEST759h10. [CR388937]	A_87_P015135	AGAATCTCCATTTGCAACAGACTGTGAGGGTTATAAATAAGACTTCAGAGTGCTCCATAG	up	1.54898	0.178788	up	1.64279	0.180048
SMURF1	Gallus gallus finished cDNA, clone ChEST563c9. [CR523061]	A_87_P011864	ACCGGAGGTTCTGTAGTAGACTGTAGAGGGCTTTTGGAGAATGAAGGAACGGTTTATGAA	up	1.54834	0.34692	up	1.75462	0.244431
AXIN2	Gallus gallus axin-related protein (AXIN2) mRNA, complete cds. [AY394491]	A_87_P035171	AAAGGGAACTTATAGATACTACTTCAAAAAGGCCAAGCGACGAGTTTGACTGGGGTGCAG	up	1.5475	0.010407	up	1.24682	0.177753
PPFIA2	Gallus gallus finished cDNA, clone ChEST384n3. [BX933176]	A_87_P023162	AATGGCTCCATAGACTCAAATGATGAAACCAGTCAAGTTATAGAACTCCAGGAGCTACTT	up	1.54728	0.385239	up	1.19006	0.764507
LOC424274	Gallus gallus finished cDNA, clone ChEST93i2. [BX934594]	A_87_P022523	GACATGATAGTGAAAGCAGGTGTATGATTTCCAAAGCTTCTAAATAAAGTTCTTTTTGCC	up	1.54722	0.100522	up	1.42288	0.167593
SLC25A4	Gallus gallus mRNA for hypothetical protein, clone 1n4. [AJ719388]	A_87_P037123	AAATGCCCTCTATTTTCACAAAGCAAGAAGTTGTCTGCTCTGATGTTCAATTGAACTAAA	up	1.54682	0.00227457	up	1.3958	0.0056143
ANK3	Gallus gallus ankyrin 3 (chAnk3) mRNA, partial cds. [U50446]	A_87_P009062	TGCGTTCCTTACATGGCAAAGTTTGTTATATTTGCTAAAATGAATGACCCTGTGGAATCC	up	1.54656	0.457972	up	1.45943	0.518582
TK1	Chicken bursa lymphoma 2.1kb mRNA 3'end for thymidine kinase (TK). [X04353]	A_87_P008975	TATCAGAGTGGCTACCTTTCCTGTGAAGATGGACGCTACCTGGAAAAGGGTCTTTTCTTT	up	1.54634	0.0122258	up	1.47456	0.0315823
RCJMB04_3f13	Gallus gallus mRNA for hypothetical protein, clone 3f13. [AJ719555]	A_87_P037011	CCCTCGGAGATCCACCATCCCCAATGCAAAGAGCATCCACAACAAAGGGACGGAAGCAGA	up	1.54593	0.0097732	up	1.43086	0.0323098
CR390710	Gallus gallus finished cDNA, clone ChEST605b21. [CR390710]	A_87_P013978	AGACAGAAACCATTACATATGAAGAGAAGGAACAGCAGTTAGTCAATGACTGTGTCAGAG	up	1.54508	0.213333	up	1.71041	0.180048
LOC415382	gonad_EST09734 Embryonic gonad cDNA Library Gallus gallus cDNA 5', mRNA sequence [CV862258]	A_87_P009944	AAGAAACAGAAGAGAAGTGGCTGTCCTCACTGGGAAATACTCGCTGGGTAGAGTATATCA	up	1.54467	0.127875	up	1.46722	0.174518
BX929387	Gallus gallus finished cDNA, clone ChEST979h11. [BX929387]	A_87_P024744	AACACTTTCTGGACGAGAGTCTTCCTCCTGTAATGAAGTGCCAATATCACCAAAGCAAAG	up	1.54449	0.0231846	up	1.39472	0.211233
TGFA	Gallus gallus transforming growth factor alpha precursor mRNA, complete cds. [AY605246]	A_87_P035112	ACCTCCCACCACCACAACTTTCAGCCCAGAGTGCTGGAAATGGGGGAAAACACCCCAAAA	up	1.54403	0.0653745	up	1.58993	0.0493338
PIK3CD	Gallus gallus mRNA for hypothetical protein, clone 11a21. [AJ851606]	A_87_P035659	TTCTGTAACAAGAGTGTGTTTACATGTTTCACTTCTCAGTTGCTCTAGGTACGTGTTTTG	up	1.54397	0.0121364	up	1.41379	0.0881315
BX934788	Gallus gallus finished cDNA, clone ChEST732i7. [BX934788]	A_87_P022417	ACATCTTGTGCGAGAAGCACGGCAGAGCCATGGAAGCCATGGAGAAGCTGAAGGCCGGGG	up	1.54393	0.00244714	up	1.54412	0.0326608
TACR1	Gallus gallus substance P receptor (ASPR) mRNA, complete cds. [AF131057]	A_87_P037872	CTGGTTTCATGTGCTCCATCATGGCTCACGTTCAAATACAAGCAAGGTTTTTCTGGCCTC	up	1.54358	0.691763	down	1.03669	0.978706
BI065004	pgf1n.pk003.d9 normalized chicken fat cDNA library Gallus gallus cDNA clone pgf1n.pk003.d9 5' similar to gb [BI065004]	A_87_P034941	CGGCCACTTCATCATGTCCAACTCTGGGGACTACGAGATCCTCTACTGGGACGTCGCCGG	up	1.54332	0.0178507	up	1.37309	0.142132
ATRX	Gallus gallus finished cDNA, clone ChEST586e9. [BX930298]	A_87_P024372	TACAGCTGTCATCCAGAGCCTCTATTGGACTTGGTCACTGCTTGTGACAGTGTTTTTGAA	up	1.54323	0.00447984	up	1.07925	0.767729
BX934815	Gallus gallus finished cDNA, clone ChEST560h19. [BX934815]	A_87_P022398	CTGGACAGCCTGGACCAAGTGGAGATCATCATGGCCATGGAGGACGAGTTCGGCTTTGAA	up	1.54214	0.00526344	up	1.24366	0.173471
PRDM5	Gallus gallus finished cDNA, clone ChEST389o15. [BX931560]	A_87_P023875	CCCAAACTGTGAGTCCAGTTTTGCAAGCCAGGAGATTCTAGCTGAACATCTTCAGACATT	up	1.5419	0.0619595	up	1.65003	0.0512646
CV860898	gonad_EST08374 Embryonic gonad cDNA Library Gallus gallus cDNA 5', mRNA sequence [CV860898]	A_87_P010149	CTCTTGACTCTTCAGACATCAATAGTTTAAGGAGACACTGTGAGAGAGGTACAATTTGTT	up	1.54167	0.183328	up	1.55956	0.217919
BX932820	Gallus gallus finished cDNA, clone ChEST270j4. [BX932820]	A_87_P023334	TCACCGAGTCCAGGCTGTCCTTCTACTCCGGGCACTCCTCCTTTGGGATGTATTGCATGA	up	1.54166	0.212525	up	1.24698	0.423084
BX934232	Gallus gallus finished cDNA, clone ChEST442o16. [BX934232]	A_87_P022680	CCTCTGTGGCAAGAATGGAGGAGGTGCATTCCTGATTCCCTATTTCCTAACTCTAATTTT	up	1.54156	0.586221	up	1.57698	0.601588
CR385926	Gallus gallus finished cDNA, clone ChEST411l8. [CR385926]	A_87_P016822	AGCAAGTGCAAGATCATTCATACGGATATTAAGCCAGAAAACATTCTGATGTGCGTGGAC	up	1.54127	0.00143276	up	1.25581	0.0628684
MUSK	Gallus gallus muscle-specific receptor tyrosine kinase MuSK mRNA, complete cds. [AY143173]	A_87_P035259	TGGGAACATCCTGTCCTGCCCAGACAATTGTCCTCTAGAGCTCTACAACCTGATGCGTCT	up	1.54073	0.342531	up	1.69484	0.30679
BACE1	Gallus gallus beta-site APP cleaving enzyme (BACE) mRNA, partial cds. [AY486555]	A_87_P035157	AAGGAGTGGTACTACGAGGTCATCATTGTCAAGCTGGAGGTCAATGGGCAGGACCTGAAC	up	1.54064	0.0792993	up	1.50005	0.0703651
NR3C2	Gallus gallus mineralocorticoid receptor mRNA, partial cds. [AF468211]	A_87_P037597	GACTCCATGCATGATCTTGTTAGTGACTTATTGGAATTCTGTTTCTACACCTTCCGAGAG	up	1.5399	0.0170089	up	1.34538	0.149776
COL2A1	Gallus gallus alpha 1 type IIA collagen precursor (COL2A1) mRNA, complete cds, alternatively spliced. [AY046949]	A_87_P035295	CAGGTATCGCGAATCCCCTCCCCTCCCCGTGTATCACCAGCAGGAGTGCTAATGTATCAT	up	1.53951	0.0113303	up	1.19862	0.175803
RCJMB04_36c8	Gallus gallus finished cDNA, clone ChEST889k14. [CR385690]	A_87_P016984	GCATGCGGACAGGTTAGACAGAAAATGGAAACGGAAAAACTACTTGGCATTACAGTCTTA	up	1.53894	0.227039	up	1.57972	0.25783
CR405737	Gallus gallus finished cDNA, clone ChEST573d17. [CR405737]	A_87_P013225	GCGAATAGACCTGACAAGCAATTCCATCTCCTGGGCAGATGTGGACGCTTTCCGTTTCCT	up	1.53867	0.224489	up	1.30921	0.466715
LMNB1	Chicken mRNA for lamin B1. [X16878]	A_87_P008947	CAAGGAAACCTGAGAGAAGCTGTGTGGTCATGTAAACTCTTTCCAGTCATCCAGGTTCTT	up	1.53849	0.0503494	up	1.35316	0.0437456
TANC1	Gallus gallus finished cDNA, clone ChEST510m22. [CR354167]	A_87_P017497	GGCACTGGCAGATTACTAAACTTCTTCTGGAGCATGGGTCTGATGTGAATTTAAGCGACA	up	1.53812	0.0588577	up	1.33941	0.174168
AKT3	Gallus gallus finished cDNA, clone ChEST106b15. [BX950472]	A_87_P021623	GTTGGATAAAGATGGGCATATAAAGATTACAGATTTTGGACTTTGCAAAGAAGGAATCAC	up	1.53778	0.0773529	up	1.27053	0.340167
PRDM11	Gallus gallus finished cDNA, clone ChEST385o13. [CR385630]	A_87_P017024	GGCTGCATAGCATGTCCCAGGAGACCATCAACAGAAATCTCACAACAGGAGACAAAAAAT	up	1.5376	0.0325791	up	1.50976	0.0705269
OBSCN	Gallus gallus finished cDNA, clone ChEST989h13. [CR389465]	A_87_P014802	TGGAAATTGAAGAAGAGAGCTCTGCTATCTTCTCCTGTGAGCTGTCCCATGATGACGATT	up	1.53733	0.800939	up	1.5822	0.800905
ARHGEF6	Gallus gallus mRNA for hypothetical protein, clone 5b15. [AJ719668]	A_87_P036934	AAACAGGCTGGTTCCCAAGCAACTACGTCAGAGAAATCAAATCCACCGATAAACCACTCT	up	1.53727	0.0255902	up	1.70411	0.0313247
LOC423466	Gallus gallus finished cDNA, clone ChEST599g7. [CR338804]	A_87_P018830	GTGAATTGGAGCCATAAATTAGAATACTACGTAGTCTTTCTTCTAGGAAAGACTGACTAT	up	1.53726	0.0166465	up	1.23634	0.138801
FIGF	Gallus gallus vascular endothelial growth factor D mRNA, complete cds. [AF479650]	A_87_P037591	TCTACTGTCCAGCTTTAATTATCATTTTGAAGTTATTGTACAACTACTGTCAGATGTGCC	up	1.53722	0.0319877	up	1.86038	0.0286138
RCJMB04_1f1	Gallus gallus mRNA for hypothetical protein, clone 1f1. [AJ851390]	A_87_P035814	TGTCATGCAAGAAGCATCAACTCCTGTCTGGCTGCTGTTTTATGGAGGGGTTGGGATCTG	up	1.53599	0.0875025	up	1.34458	0.191531
CR406505	Gallus gallus finished cDNA, clone ChEST735i10. [CR406505]	A_87_P012736	CCACCTGCTTCAACGGCACATTGGATGCCTTTGTGAAGATCACACGCCACGAGGGCATCA	up	1.53591	0.161459	up	1.43678	0.317914
CO766075	spleen_EST01801 Spleen cDNA Library Gallus gallus cDNA 3', mRNA sequence [CO766075]	A_87_P019653	TCACCTCAGCAACAGCTGGAACTGCAAGAATTTCTAGGAAAAATAGCGGGAATAACCAGC	up	1.53581	0.00782104	up	1.1142	0.565237
CR733197	Gallus gallus finished cDNA, clone ChEST902g9. [CR733197]	A_87_P010799	CTTGCCAGTCTGCTCTCAGAACAAGCTTCTTGGTCCTCTGGGGCCAAAGCCAAGAGTGCT	up	1.53572	0.0115017	up	1.24647	0.114858
PKNOX2	Gallus gallus PREP2 mRNA for TALE homeodomain transcription factor Prep2, complete cds. [AB086816]	A_87_P038113	TGGCCTCCCGGCTGCGCCTGGTGCTAACCTTGGTTTGGACCACAGTGACTCACTGGAGTA	up	1.53571	0.108635	up	1.27057	0.369272
RCJMB04_7n10	Gallus gallus mRNA for hypothetical protein, clone 7n10. [AJ719886]	A_87_P036792	GAGTGGTTGGGGAAAGGGGGAATGCTGCTTTATTTCCTTGCATTTGTTTATCTATTGCTT	up	1.53566	0.348803	up	1.22666	0.729101
SSTR3	Gallus gallus somatostatin receptor type 3 (SS3R) mRNA, complete cds. [DQ003337]	A_87_P009712	AAAGAAATGGGCAAAAACCACTCCCCGAGGAGCCTGTGGGCTGTGAGAAGAGCAGCAAGT	up	1.53543	0.481302	up	1.39359	0.654577
BX932811	Gallus gallus finished cDNA, clone ChEST268h5. [BX932811]	A_87_P023341	TGCGGATCCAGGAGGTTCTAAACTCAACAGAGATAAACTTGCAGCAACTGACAGCTTTAG	up	1.5346	0.0117139	up	1.30639	0.146393
ADCY5	Gallus gallus mRNA for adenylyl cyclase type V (AC5 gene). [AJ293817]	A_87_P037462	AATGGATTTGCACTCCCATAACGTTTCCATCCCATACTGCCAGCTATTTGAAGTGTACCA	up	1.53356	0.0345451	up	1.4525	0.0250901
PECAM1	Gallus gallus finished cDNA, clone ChEST956b23. [BX935338]	A_87_P022179	GGGCGAAGTTGTGAAATTACGTTGTGAGCTGCCAGAAGAAGTGCCTCCATTATATTTCGT	up	1.53353	0.0354429	up	1.55886	0.0383936
CO767809	spleen_EST03535 Spleen cDNA Library Gallus gallus cDNA 3', mRNA sequence [CO767809]	A_87_P019543	CAGAGACCCCTGGAAAGTGTATCTACACATTGTATCTCATGAGTGACAGTTATCTTGGCA	up	1.53283	0.100511	up	1.4374	0.122387
EPGN	Gallus gallus epigen precursor, mRNA, complete cds. [AY885230]	A_87_P035027	TTTTGTTCCACCCCAGCCAGACAGGTTATTTATTATCAGGTGCTTGTTTTGCTTCGTCTT	up	1.53253	0.212534	up	1.75589	0.113037
RCJMB04_2l20	Gallus gallus mRNA for hypothetical protein, clone 2l20. [AJ851436]	A_87_P035779	TCATGTCTGCTGAGAAGGTCTTTTAAGGATCTGGGGCTGGAAACGCTCTTTAAAAATCCC	up	1.53242	0.0594114	up	1.31004	0.214438
CR385370	Gallus gallus finished cDNA, clone ChEST632d9. [CR385370]	A_87_P017172	TGCTTCCTCAAACACCACCGTGCTGTGGACTCAGTGTTCAGCGACCTCAGCACCAAAGCA	up	1.53236	0.576693	up	1.39647	0.657294
ACHE	Gallus gallus partial mRNA for acetylcholinesterase (ACHE gene). [AJ698327]	A_87_P037213	TCGGTGGGTTTTCACCTCTTATCGCCCCATAGCAAAGGGTTGTTCCGTAGGGCCGTCCTA	up	1.53031	0.298448	up	1.29123	0.680543
TBX3	Gallus gallus T-Box protein 3 (TBX3) mRNA, complete cds. [AF033669]	A_87_P037986	AGGCTTGAGCGGCGAGGAACTGAAAAGCCCCCTCCGGGACGGCCCTAAAGTAGACGAGAA	up	1.5301	0.0892543	up	1.38912	0.279828
LOC416308	Gallus gallus finished cDNA, clone ChEST661b7. [BX933563]	A_87_P022967	GTCCTGATTATTTCTCTCTATGCTCATGAATACCTCCACTCTTTATTTCCTAAGCATGAA	up	1.52996	0.699803	down	2.41446	0.289198
DN852598	4148488 BARC_3GAL chicken mixed tissue Gallus gallus cDNA clone 3GAL_32I19 5', mRNA sequence [DN852598]	A_87_P009736	AAAGGGAGGGGAGGAGGAGAGAACCGTGAAAGGGAGTCTCTCAATAACTCTGTGGCCCCC	up	1.52987	0.237297	up	1.22839	0.591544
SMYD3	Gallus gallus finished cDNA, clone ChEST358l13. [BX932267]	A_87_P023568	GTGTGAGGCCATGATGAAATTACACTGAATAAAATCCCAGTCTGGAAAACAAGACATTCA	up	1.52879	0.0247496	up	1.59567	0.0446709
LOC419210	Gallus gallus finished cDNA, clone ChEST204f7. [CR391254]	A_87_P013599	CTGCTATTTGCACCTTTTCAGAGCAGTTACTGGCTGCGCTCAACTATCGATACAACAACA	up	1.52789	0.103689	up	1.57842	0.118686
CN218826	RJA040B07.ab1 RJbrain Gallus gallus cDNA 5', mRNA sequence [CN218826]	A_87_P020841	AAGATCGCCGAGGTGCGCAAAGAGGTGCTGTTCTTCAACAACTTCCTGCAGGACCCCAAA	up	1.52692	0.113968	up	1.55416	0.141465
AJ720310	Gallus gallus mRNA for hypothetical protein, clone 14l15. [AJ720310]	A_87_P036497	TGGGACTCACGCCTCACTATGTTTACCCCCAAGCTATCATTCAGCCCAGCGTGGTGATCC	up	1.52649	0.121496	up	1.22094	0.483165
LOC421406	Gallus gallus finished cDNA, clone ChEST595l6. [BX932473]	A_87_P023483	TCTTTTGTGCCTTTAAACTTGTATGTAGTTTGTTAACCTCTTTAAATGTTACTGTGGGGC	up	1.52639	0.142731	up	1.56297	0.133539
CN227876	RJB097F10.ab1 RJtestis Gallus gallus cDNA 5', mRNA sequence [CN227876]	A_87_P020705	ATCACAGTTGGAGGAAAAGGGAAAAGTTGAAAGCACAAAATAATGTTGCACAAGTCACTT	up	1.526	0.166061	up	1.48089	0.233309
CO767237	spleen_EST02963 Spleen cDNA Library Gallus gallus cDNA 3', mRNA sequence [CO767237]	A_87_P019583	CAGCAGTGTCTAAACTGGAATGGCATCCATTCACATTAACCTCTGCCCCAGAAGAAGATT	up	1.52584	0.462001	up	1.45078	0.585596
BX932044	Gallus gallus finished cDNA, clone ChEST408j6. [BX932044]	A_87_P023678	GGTAATAAATAGACAGAGAAGTTCTGATTATCAGTTTCCATGCTCTCCATTTTCAGACAC	up	1.52554	0.172825	up	1.31395	0.426222
IRF8	Gallus gallus domesticus (clone cICSBP) interferon consensus sequence binding protein (ICSBP) mRNA, complete cds. [L39767]	A_87_P009462	TTTCTTTTTTCCCCCAAAGAATTTGCAATCCTGCTGAAGTCTGTGGTATGCCTTCCATGG	up	1.52517	0.0310957	up	1.5731	0.0131933
CR388769	Gallus gallus finished cDNA, clone ChEST889k22. [CR388769]	A_87_P015250	TCTGGATGGACTTGGTCCTGCCCAGCTTGTAGGGCGACAGACATTGGCAACACCATCAAT	up	1.52481	0.0174908	up	1.52832	0.0767812
TMEM35	Gallus gallus finished cDNA, clone ChEST541g2. [BX950482]	A_87_P021619	GTGAAGGTATCTTAGTGGAGCGAGTGTGAGGAATACGGACCCTCGAGGCAGCTCTCTCCA	up	1.52416	0.00991341	up	1.26508	0.0741943
LOC418839	Gallus gallus finished cDNA, clone ChEST93c22. [CR385573]	A_87_P017065	CAAGCCAAGGAAGAGCAAACGCATACACAAGCAATGCTTAAAGTCCTGCAGGAACAGTTA	up	1.52382	0.0880368	up	1.35144	0.21257
LOC396494	Gallus gallus EGF/TGF-alpha receptor (c-erbB) mRNA, complete cds. [M77637]	A_87_P009300	TGCTATGCTGACACCATGAACTGGCGCAGCTTGTTTGCTACTCAGAGTCAGAAAACAAAA	up	1.52367	0.00946553	up	1.34207	0.0669491
CN234005	RJA121G07.ab1 RJbrain Gallus gallus cDNA 5', mRNA sequence [CN234005]	A_87_P020524	CTTCAGAATGATCGCGATGACCTTTTTTCCAATACCAGAGAGTTGGAGCATCTTCACCAA	up	1.52356	0.104583	up	1.0522	0.83984
ANKRD43	Gallus gallus finished cDNA, clone ChEST207l24. [CR391256]	A_87_P013597	GCTTCACCGCCCTGCACTGGGCTGCTAAGAATGGCAACTGTGACATGGTGAGGAACATCA	up	1.52347	0.411035	up	1.12867	0.828627
CRY2	Gallus gallus cryptochrome 2 mRNA, complete cds. [AY034433]	A_87_P035306	TCTGCAACAGAAAATCGGGGGCCTCATAAAATATGTAATTCCAATAGCTGCCACAGGGGG	up	1.52321	0.371442	up	1.6584	0.28511
DQ198090	Gallus gallus Toll-like receptor 21 mRNA, 3' UTR. [DQ198090]	A_87_P009683	TAAGGCTCCCCCCGCTTCACTTGTCCCTCGCTATGGTCATATTTGGGGTGAGGTGGGATT	up	1.52294	0.0815177	up	1.19167	0.23143
CD82	Gallus gallus mRNA for hypothetical protein, clone 8k16. [AJ719947]	A_87_P036748	AGAAAGGAGCAAACAGAACATTTTCTGCCTCGTACCCAGACTGTCCAACCATTGACCATT	up	1.52271	0.0640033	up	1.4287	0.0915504
DDX46	Gallus gallus finished cDNA, clone ChEST915c13. [BX933862]	A_87_P022840	AAAGAGAAAGATGACAAGGAAGAAGAGAAGGATAAAGATGCCAGTGCATCCACCGTGGCT	up	1.5223	0.0922478	up	1.21605	0.39638
RCJMB04_14h20	Gallus gallus mRNA for hypothetical protein, clone 14h20. [AJ720303]	A_87_P036500	AGTTTTGCAGAGATAGTCTTACATATAATTTCCTATATGGTCTGCAAACAGCCACAATTC	up	1.52186	0.000891615	up	1.48313	0.0144703
B2M	Gallus gallus b2m-Z01 mRNA for beta-2 microglobulin, complete cds. [AB178593]	A_87_P038061	CCGACTTCACACCCAGCAGCGAAGCCGTCTACACCTGCAAGGTGGAGCACGAGACCTTCA	up	1.52178	0.274653	up	1.16622	0.704196
CR389452	Gallus gallus finished cDNA, clone ChEST185g6. [CR389452]	A_87_P014808	CAGCATCCCCAGCCCTCAAGACAATGAGAGCGACTCAGATTCATCCGCTCAGCAGCAAGT	up	1.52124	0.224489	up	1.44626	0.300987
LOC418020	Gallus gallus finished cDNA, clone ChEST158d15. [BX932090]	A_87_P023659	TGGCTGTGACACGGGGATGGTGATGTGGTGTGGTGGCATTTGCCACCCTGGGAAGAGCTC	up	1.52102	0.464415	up	1.45936	0.563879
GCHFR	Gallus gallus finished cDNA, clone ChEST771a4. [BX950302]	A_87_P021702	GGTTCCCGAAGTAGCCCTAGATCAACACAAACAAGTCTTGTAAACATTTCAATTATGGGC	up	1.52102	0.0632709	up	1.48222	0.0720217
SPG21	Gallus gallus finished cDNA, clone ChEST598e16. [BX930549]	A_87_P024259	CCGATTATCACTGTGTGATTCCAAGAGGATCAAGTCAGTGAGCTACTCGCGGACAATAAA	up	1.52049	0.374547	up	1.39231	0.52437
AW328748	EST00012 Normalized cDNA library Gallus gallus cDNA clone TUCEST12, mRNA sequence [AW328748]	A_87_P035324	AACTGAACGAGGGAGACTTACTAGCAGAAATTGAGACAGATAAAGCCACAATAGGCTTCG	up	1.51978	0.291076	down	1.33576	0.835121
CR388523	Gallus gallus finished cDNA, clone ChEST592m10. [CR388523]	A_87_P015411	CTGGGTTACTGCATCTTAGATCTCTGTCCAGTGTACTACGGTGTCATGCAGGTGTGTACG	up	1.51893	0.00694636	up	1.1326	0.31666
CN219242	WLA003A05.ab1 WLbrain Gallus gallus cDNA 5', mRNA sequence [CN219242]	A_87_P020836	AATGACACTCTGGTTAGTTTGGGTGGAGAGGAAGACTGCTACCACTGAAAACTAGAAACG	up	1.51784	0.481183	up	1.41874	0.591297
VAV2	Gallus gallus GDP/GTP exchange factor VAV2 (VAV2) mRNA, complete cds. [AY046916]	A_87_P035296	TGGGGCGAACCCACATGAGTAAGGGCTATGGTATGAAGTCCCGATTTATCTCAATACATT	up	1.51782	0.000891615	up	1.35842	0.00710859
GK	Gallus gallus finished cDNA, clone ChEST604n13. [BX950602]	A_87_P021555	GCAGTGAAACTTCGGTGGCTTTTGGATAATGTGGAAGAGATCAGGCAAGCAGTTGATGAT	up	1.51709	0.0878144	up	1.41452	0.177814
BG712060	pgl1n.pk010.l14 Normalized Liver Library Gallus gallus cDNA clone pgl1n.pk010.l14 5' similar to pir [BG712060]	A_87_P034957	ACCTCTGCGGAAACATGGCTAATCTGTCCCTTCACGATCACGATGGCTCCAGCGGTGCTT	up	1.51702	0.238517	up	1.34312	0.414745
COPS4	Gallus gallus mRNA for hypothetical protein, clone 15i11. [AJ720334]	A_87_P036483	GCCCATTACTTCCTAAGGTGTTCATCCCACTGTGACAAATGGAAGTGCCATGTATCTTCT	up	1.51649	0.0124189	up	1.26828	0.141758
RCJMB04_26n19	Gallus gallus mRNA for hypothetical protein, clone 26n19. [AJ720825]	A_87_P036149	TTCTTTGATTTATAACGGTATGCTGACTCAGGTCTATGTGTTACCTATGGCATTTACTTC	up	1.51622	0.00746439	up	1.38789	0.0045941
LOC417869	Gallus gallus finished cDNA, clone ChEST70i24. [CR354323]	A_87_P017394	TCGGGACCCAGTGGCACAGGAAAAACCTATTTAGCTAATAGGCTGGCTGAATATATTATA	up	1.51616	0.00491326	up	1.19464	0.311128
LOC418356	Gallus gallus finished cDNA, clone ChEST305c23. [BX934166]	A_87_P022715	GCTGGGGAACAGCCCCTTACAACCCACAGTTCATCCTCTGGCCAGACTTTCTATGTGGAC	up	1.51519	0.238003	up	1.26103	0.734779
RCJMB04_34i9	Gallus gallus mRNA for hypothetical protein, clone 34i9. [AJ721081]	A_87_P035954	TCCCGACTTTGTGCATCAGGTGCCACAGCTCAGTGTCACCCCCTTTGCAGAGGGGTGGCT	up	1.51494	0.0174462	up	1.29823	0.0796449
ITGB1BP2	Gallus gallus finished cDNA, clone ChEST989h7. [BX929509]	A_87_P024694	AGAGCACACGGAGCCCCGAGCAGCCCGTAGCTCTCACAAGGGACAAGCAATAAAAACACA	up	1.51438	0.00828075	up	1.68836	0.0202044
BX933868	Gallus gallus finished cDNA, clone ChEST1003f2. [BX933868]	A_87_P022838	CTTGCAGCAGGACTCTCATGTTTCACACAAATCCACACACAGAGATGCATGGCTTTCATT	up	1.5143	0.00491326	up	1.33341	0.0976426
RCJMB04_8k11	Gallus gallus mRNA for hypothetical protein, clone 8k11. [AJ719946]	A_87_P036749	CTTCTTTGGTCACCAGTAGCCACATGGTTTTGCTGGGGAAGAAAACTTTCCAGACTGAAT	up	1.51415	0.253411	up	1.25346	0.630947
Y14828	Gallus gallus RNA for CpG island, clone 2. [Y14828]	A_87_P008729	AAACAAGGGCCAGAATAAAAAGGGGAGTAGGGACATCCACTTGCTCGGACTCCCCGTTGC	up	1.51393	0.529946	up	1.10786	0.88449
CALD1	Chicken h-caldesmon mRNA, complete cds. [M28417]	A_87_P009371	CAAACGTAATCTCTGGGAGAAGCAGTCAGTTGAAAAGCCAGCTGCTTCTTCTTCAAAGGT	up	1.51363	0.00605319	up	1.17937	0.166504
AY702002	Gallus gallus endoglin mRNA, complete cds. [AY702002]	A_87_P035074	ACTGCTGGGCTCTGGTATATCTACTCGCATACCCGTCCCATCTCCAAACTGCAGCCGGTT	up	1.51345	0.046976	up	1.30631	0.173662
ASCC3L1	Gallus gallus mRNA for hypothetical protein, clone 2m11. [AJ851437]	A_87_P035778	GTTTAACACCGTCTATAACAGCGATGACAACGTGTTTGTGGGCGCCCCCACGGGAAGTGG	up	1.51298	0.00731265	up	1.43429	0.02776
LIMK1	Gallus gallus limk1 mRNA for LIM kinase 1, complete cds. [AB073752]	A_87_P038124	AAGGGAACTCAAACTGTGATGTACCCCGGCCCTCGGTCAATAAATCCTTCCCCGCTCGCT	up	1.51268	0.000891404	up	1.41492	0.00216316
GRM5	Gallus gallus metabotropic glutamate receptor 5 splice variant mRNA, partial cds, alternatively spliced. [AY078349]	A_87_P035283	AGAAAAAGATGTAATAATCCCTGAAATCTAAGCAGTTGTGTTGGTGTTCTCTGCTGGTAT	up	1.51264	0.656601	up	1.43019	0.758321
CD215516	pgp2n.pk008.a24 Normalized chicken pituitary [CD215516]	A_87_P021385	GTGGGCACGGCGCACTCGTGGAGGGACAAAGCTTCCAGGACCTTCCTCAAGAAGAACTCC	up	1.51152	0.121936	up	1.26362	0.114092
CR386854	Gallus gallus finished cDNA, clone ChEST36m8. [CR386854]	A_87_P016207	TTTAGATGACTCTCCTGTATTTTACAAAGGGAAGTTTCATTGTGTGATAACAGTCTGTAC	up	1.51043	0.237717	up	1.2934	0.478733
RCJMB04_4p22	Gallus gallus finished cDNA, clone ChEST746o20. [CR390973]	A_87_P013809	TCCAAGGCGTGACGGGCAACAACATGTATGCAGTCCCAGCCCTCACAGTGGATTCCCTTA	up	1.51041	0.424988	up	1.40822	0.598185
PHLDB2	Gallus gallus finished cDNA, clone ChEST555p4. [CR406792]	A_87_P012529	AAGTCATATTGAAACAGCTGGTCACAACATAGAGACCTGTTACCACGTCTCCCTCACAGA	up	1.50985	0.0253337	up	1.29963	0.169057
MDN1	Gallus gallus finished cDNA, clone ChEST559b21. [CR523793]	A_87_P011366	CGTGCCCAAGAGCAGGAGGCAATGGAAAAGAGTCTGTACAGATTCAGAAGTAAAACTCAT	up	1.50898	0.391127	up	1.26253	0.656316
CR406282	Gallus gallus finished cDNA, clone ChEST860g6. [CR406282]	A_87_P012891	AAGCTTAATTCAAACTATTGACAGTGTGATGGTGCATATGACACGCAATCTGGAAGAAAA	up	1.50782	0.41525	up	1.81635	0.282283
X61200	G.gallus 126 MRP mRNA. [X61200]	A_87_P008893	TCTCCCAACCCTCCGCTCCTCCATCCCTTCAGGTTTGATGGTTTTGCTGCCAAATAAAGA	up	1.50762	0.0165757	up	1.29059	0.107627
BX929922	Gallus gallus finished cDNA, clone ChEST291i16. [BX929922]	A_87_P024526	TTTTCTTTGGGTACCTGAGTAAAAAGAAAGTACGGGTTGGAGTTTGTCCCCCTGTGGATG	up	1.50749	0.0319877	up	1.29397	0.194817
VMO1	Gallus gallus VMO-I mRNA for vitelline membrane outer layer protein I, complete cds. [D26093]	A_87_P009803	TCTATCTCTGTACTGTTCCTGGTTGCAGTGCTCCATATCTGATGCCTGCTGCAATAAAGT	up	1.50733	0.71636	up	1.62038	0.689421
LOC420553	Gallus gallus finished cDNA, clone ChEST984f20. [BX929360]	A_87_P024752	ATTTACCCAGCGCAGTTGCTGAAGGAATGCCTTGAGTTTGCACACAGGCATGAATTACAT	up	1.50635	0.413307	up	1.57806	0.425323
AF072676	Gallus gallus truncated testis-specific box 1-A prolactin receptor precursor (PRLR) mRNA, complete cds. [AF072676]	A_87_P037939	CTCCAAGTGACTGCAAAAGAGAAACTGGTGGATCAGAGTACATGGACCCATCCTCATTTA	up	1.50589	0.34723	up	1.43319	0.451579
LOC418767	Gallus gallus finished cDNA, clone ChEST604j14. [BX950616]	A_87_P021548	AAATCCATTGGATTGATAAGGCAAACCATGGGATGGCAGTAAAAGGCCGAACAGAAGATG	up	1.50544	0.0319615	up	1.34453	0.233528
GATA4	Gallus gallus GATA-4 transcription factor (GATA-4) mRNA, partial cds. [U11887]	A_87_P009150	ATCAGCCAGTCTCCACAAGCCAGCTCCAAACAGGACTCCTGGAACAGCCTGGTCTTAGCT	up	1.5048	0.186847	up	1.32442	0.463159
LOC418747	Gallus gallus finished cDNA, clone ChEST733k17. [CR406812]	A_87_P012512	CTTTTTTAACTGCTGTTGTGGCTTAGAGGTTCAAAGTCAGAGGTCTCTATTGTAATTATG	up	1.50446	0.120025	up	1.48709	0.219266
PRNPIP	Gallus gallus finished cDNA, clone ChEST269d13. [CR389892]	A_87_P014515	ATTTGAAAGTGATGTTACCAGGACAATGCCAGTACTTAGGGCTGCCGGTTGCTGATTACT	up	1.50402	0.0277179	up	1.37286	0.177619
TCEA2	Gallus gallus finished cDNA, clone ChEST801c11. [BX929727]	A_87_P024610	CAGTAATGAGCTGAAAGAGATCAGGAAAGCCATGACAAAAGAAGCAATCCGGGAGCATCA	up	1.50399	0.0577754	up	1.36474	0.186325
RCJMB04_11a3	Gallus gallus finished cDNA, clone ChEST41d20. [CR390021]	A_87_P014418	AGCACCTGAAGTGCCGAAAGGGCTGGGTGATGGATCTGATCAATGCGCTGCACCAGAACA	up	1.50391	0.355612	up	1.26456	0.626473
FCN2	Gallus gallus finished cDNA, clone ChEST872o21. [CR406783]	A_87_P012535	AAGTGCATTACTTTGATGTAAAGACTACCTTGGTGGTAAGGCTACTGTTTTTCAGTAAAA	up	1.5037	0.0599285	up	1.51112	0.125013
TACC2	Gallus gallus finished cDNA, clone ChEST697p16. [CR524009]	A_87_P011212	TATTGACAAGTGGGATGATCCCAATTTTAACCCGTTCTCCTCTAGTACAAAAATGCAAGA	up	1.5031	0.0489066	up	1.25295	0.0835194
LOC418120	Gallus gallus finished cDNA, clone ChEST747e15. [BX931655]	A_87_P023836	CAATTGAGCCACCTCTACAGTGTACCTCCTCAAGGCCGTTATCAGAAACCCACGCACTTT	up	1.5028	0.157141	up	1.44083	0.23143
SUZ12	Gallus gallus finished cDNA, clone ChEST848n23. [CR406204]	A_87_P012933	GAACCAAGCAACAGCCATATGGTGAAGTCTTACTCATTGTTATTCAGAGTAACTCGCCCA	up	1.50228	0.260832	up	1.61383	0.236985
RAD54B	Gallus gallus Rad54b (RAD54B) mRNA, complete cds. [AF178529]	A_87_P037823	CAATAGCTACTGAGGTCCAAGTTTCGGAGGCCAGGGTTTGTTGCTGTGTCAAAATGTTAT	up	1.50199	0.291017	up	1.24477	0.714223
LOC421758	Gallus gallus finished cDNA, clone ChEST533k8. [CR387722]	A_87_P015614	TGAAGCCACGAAGAGGCCCTGGTCAGTCTGCTTGATGAGAGGCTTAGCCTCATCCACCGC	up	1.50166	0.260008	up	1.4652	0.349316
ASPM	Gallus gallus finished cDNA, clone ChEST686j7. [CR405903]	A_87_P013126	AATGACAGTTATCAAGTTGATGGAGATATAGTAGAGCCACCCGTTCCAATTCTGTCACCT	up	1.50151	0.218992	up	1.09863	0.737672
LOC396510	Chicken chondrocyte specific short collagen, encoding HMW/LMW precursor. [K01702]	A_87_P009531	CTTAACTCCTTGGTTGCTTTTGTATGTATGTTTACATTCAGTACCAATAAACAGAACAGC	up	1.50139	0.161459	up	1.40256	0.281279
LHX1	Gallus gallus domesticus (clone 2.3 kB) lim-1 mRNA, complete cds. [L35569]	A_87_P009469	AAATCTAACATCTCTCCCGCCCTAAGACAATGTCACCTCGGGAACGAACTGTGCCCGGCG	up	1.50131	0.212399	up	1.27997	0.375356
MYH11	Chicken mRNA for gizzard smooth muscle myosin heavy chain (MHC). [X06546]	A_87_P008971	TCACGAAGAATCTTCCAGAAAGTGAGTTCCAGTAGTTCAATTTAAATCTCAGTGAACTGA	up	1.50103	0.0744397	up	1.50995	0.121902
CR523722	Gallus gallus finished cDNA, clone ChEST958d15. [CR523722]	A_87_P011416	TGCAGCTCGGCTGTTGCTGAAAGCTCTTGCTTCAACTCTGCCTTGCAGCCCAAAGCAGGA	up	1.50079	0.598809	up	1.64398	0.546752
PCDH17	Gallus gallus cadherin mRNA, partial cds. [AF098476]	A_87_P037900	ATGAGCAGACAAAGCACTTTGAGTTTCGCGTGCTGGCCAAGGACTCAGGTTCACCCCACC	up	1.49993	0.449309	up	1.4261	0.349181
PFKM	Gallus gallus pfk mRNA for phosphofructokinase, complete cds. [AB083368]	A_87_P038116	TGAACCTGCGGCTGATGCTGAAGATGCTGGCCAACTACCAGATCAGCCTGACCGAGTACA	up	1.49847	0.0187339	up	1.26824	0.158491
CXXC5	Gallus gallus finished cDNA, clone ChEST896h23. [CR353044]	A_87_P018197	AAAGTGGAATAATAAGTGAACCTTTGAACAAAAGTCTTAAGAAGTCCCGTCCGCTCTCCC	up	1.49835	0.0669938	up	1.27687	0.25004
LOC426509	Gallus gallus finished cDNA, clone ChEST136h12. [CR390523]	A_87_P014099	GCCAAGTCTAATTCAAAGCTTAAGCTGGTCAGGAGCTTGGCTGTGTGTGAAGAATCGTCC	up	1.49783	0.0172579	up	1.1268	0.180723
STAM	Gallus gallus finished cDNA, clone ChEST36p10. [BX933125]	A_87_P023189	TCTTTAACCTCTGCTAAAGGCAGTTGACAATGCTTTGAGTTTCTTCCTTTAATCTCTTAA	up	1.49746	0.0398759	up	1.50664	0.059344
CR386142	Gallus gallus finished cDNA, clone ChEST363h19. [CR386142]	A_87_P016679	CCCTGTGTCATCACTGTGCAGGATGGGCAGCCAGCTCTTGGTTTTCCAGCTGTAGCTGTA	up	1.49725	0.0573407	up	1.5587	0.0512646
BX932857	Gallus gallus finished cDNA, clone ChEST272k3. [BX932857]	A_87_P023311	TCAAACGGAGGCCTCTCACCTTCTGGGCATCTTTGCAAACACAAAAGGCAGGCCTTTCAA	up	1.49712	0.637802	up	1.22772	0.841463
BI392251	pgp1n.pk007.e20 Normalized Chicken Pituitary [BI392251]	A_87_P034917	AGTTCCTGGTGCCCAACGATCTGATCGGCTGCATCATCGGCCGGCACGGCAGCAAGATCA	up	1.49627	0.175489	up	1.44409	0.34255
CN223856	RJA020H12.ab1 RJbrain Gallus gallus cDNA 5', mRNA sequence [CN223856]	A_87_P020788	AGCACGGCAGGCTCAGAGCTTTCTGTGAGCTTGCAGGCCATCCTCCAGCCAAGAGTTTTT	up	1.49613	0.625835	up	1.01761	0.977712
MYL9	Chicken mRNA for smooth muscle myosin regulatory light chain (MRLC). [Y00983]	A_87_P008761	GCGCCCATCGACAAGAAGGGCAACTTCAACTATGTGGAGTTCACCCGCATCCTGAAGCAC	up	1.49592	0.00202491	up	1.26778	0.134006
TEN2	Gallus gallus teneurin 2 (TEN2), transcript variant 1, mRNA [NM_204097]	A_87_P009213	ATTGTGTTACACTATTGCAAATGGGCACCACGTCAGATCACCCTGTACATACATCAGCCA	up	1.49561	0.00423272	up	1.29725	0.0264502
LOC428834	Gallus gallus prolactin releasing peptide receptor-like (LOC428834), mRNA [NM_001024585]	A_87_P009262	CTCCCTCCATGACAAGTTCCGCTTCCACCTCAGCAGTTACTTCTACCGCAAGAAGAAGAG	up	1.49433	0.464873	up	1.65342	0.211275
MDM4	Gallus gallus finished cDNA, clone ChEST158b20. [BX932104]	A_87_P023653	TTGGATTTGGCACGAGAATGTGCAAGGAGGGACTCTCTGTTGAGTTTCACTGAGCATAAA	up	1.49419	0.46463	up	1.51699	0.495748
CR353325	Gallus gallus finished cDNA, clone ChEST279n16. [CR353325]	A_87_P018011	ACGCCAAGGATGTACCAGAGTATCGCTGCTTTTCCATCATTTTCAAAGACCAGCGGAAAA	up	1.49412	0.212534	up	1.65927	0.220597
LOC421258	Gallus gallus finished cDNA, clone ChEST435j19. [CR387018]	A_87_P016092	ACACGGAAAGCATTGATATTGTGGAACAGCAGACTGAGAGCCTAGAGCTTCACACAAATG	up	1.49313	0.231304	up	1.22977	0.564518
LOC420407	Gallus gallus fowlicidin-2 mRNA, complete cds. [DQ092352]	A_87_P009700	AAGGTCACCATCACCATCCAGGGCAGCGCACGCTTTGGCTGAATGAATAAATGGGGCCAC	up	1.49309	0.344447	up	1.33738	0.54685
SC4MOL	Gallus gallus mRNA for hypothetical protein, clone 5j19. [AJ719718]	A_87_P036902	GAGTTGTTAATCTCAGAATACCTGGCTGAACATGAGTTAGCAGAGACATTCCTGATCTAG	up	1.49233	0.00887927	up	1.1922	0.10673
BX932577	Gallus gallus finished cDNA, clone ChEST621i23. [BX932577]	A_87_P023443	ATATATGCCCCCTGATGATCAAATGGGGCAGGATAACTCTCAGTCTATGGACACAAGCAA	up	1.49226	0.291893	up	1.46669	0.347256
BX950615	Gallus gallus finished cDNA, clone ChEST603m23. [BX950615]	A_87_P021549	ATGTGCAGTCATATTACATCGCCTGCTTTCCATTTTGTCCCTGAAGGTGCCAATGCCATA	up	1.49165	0.0875025	down	1.07821	0.809419
FSTL1	Gallus gallus mRNA for Flik protein. [AJ238977]	A_87_P037498	CAGGCTGAGAAGATTAAGAAGATGAGCACCAAGGAGATGTAAGGGGCCTCCACATCGGAG	up	1.49134	0.00653205	up	1.33053	0.0912207
THBS2	Chicken thrombospondin mRNA, complete cds. [M60853]	A_87_P009321	ACCTTTGCTGGTGGACGATTAGGTCTATTTGTCTTCTCTCAAGAAATGGTCTATTTCTCT	up	1.49131	0.015528	up	1.39211	0.110111
LOC396002	Gallus gallus finished cDNA, clone ChEST747g12. [CR407140]	A_87_P012274	CGAAGGAAATTTCAAGGACATTGTGTTTGGCTCTTTCCCGTCTCTCCCCAGTAAAGTTCA	up	1.49096	0.0199695	up	1.19895	0.15402
CR353007	Gallus gallus finished cDNA, clone ChEST543p10. [CR353007]	A_87_P018221	CTCCCCATTGTTGTCCTCTTTGATCCCTATGTTGATATGTGCCAGGTCATAGACAACAAA	up	1.49075	0.169058	up	1.3291	0.282328
PLEKHQ1	Gallus gallus finished cDNA, clone ChEST918o5. [CR406906]	A_87_P012444	CAGCCTCAGAGCCCCAGCAGCCTGATTCTTCCTTAGTATCTGCGTATATTATGCTAAAAA	up	1.49063	0.164528	up	1.52179	0.0850613
BU418376	603957467F1 CSEQRBN09 Gallus gallus cDNA clone ChEST927e18 5', mRNA sequence [BU418376]	A_87_P027663	GGTATCTCTGACAGCTGAAGCGTACAGCCGGCAGCATCGATTAGACCAGGAGCAGATCGA	up	1.49052	0.393469	up	1.14397	0.802435
CD40	Gallus gallus mRNA for human CD40-homologue (TNFSF5 gene). [AJ293700]	A_87_P037463	GACGAACACTTCCGATGTGATCTGTGAGTCAAGCCGGCGCTCATCGCTGTCAGTGCTGAT	up	1.4904	0.299622	up	1.11213	0.819797
CV861661	gonad_EST09137 Embryonic gonad cDNA Library Gallus gallus cDNA 5', mRNA sequence [CV861661]	A_87_P010037	TGCTGCCTTTGGCTGCTGCATGTTTTACTGACTGGTTTTACTGCAAGGCCCAAAGAATAA	up	1.49018	0.00856909	up	1.19958	0.236985
PHLDB1	Gallus gallus finished cDNA, clone ChEST296p18. [CR391517]	A_87_P013399	AGCTGAAGGGCGTCATCTACTTCCAAGCCATCGAAGAGGTGTACTACGACCACCTCCGCA	up	1.4901	0.0079242	up	1.10611	0.414745
LOC417888	Gallus gallus finished cDNA, clone ChEST334d22. [BX931470]	A_87_P023918	TTGGTGCTCACATGAATGTTGGAAGAACTTACAAAAACTTAAACAAAACTAAAGAAGCCG	up	1.48948	0.46463	up	1.40842	0.56697
SNCB	Gallus gallus beta-synuclein (SNCB) mRNA, complete cds. [AF253514]	A_87_P037742	TTCCAAGGGACCATGTCCATGTCTCCGTACCGTGTCTAGCAGTGAGAACCCGCTGTGTCT	up	1.48934	0.21086	up	1.43077	0.360493
ST5	Gallus gallus finished cDNA, clone ChEST341c7. [CR353312]	A_87_P018021	GCTGCAACGTGTAGGTACAGTACGTCCTTTCCTCATGTATGTATGTATGGTTCCCAATAA	up	1.48921	0.00553441	up	1.2533	0.0404471
CO773844	testis_EST04941 Testis cDNA Library Gallus gallus cDNA 3', mRNA sequence [CO773844]	A_87_P018935	AGAACTGCCCACGTGCAAAGGAAAGAGTGAAAAATGTGGCCCACCTCCAGATATTGAAAA	up	1.48905	0.322259	up	1.13596	0.780162
YBX1	Gallus gallus Rous sarcoma virus transcription enhancer factor III mRNA, complete cds. [U31990]	A_87_P009097	ACAAGTAGCACTTTAATGCTGGTATAGTGACCTGAAAGATTCTGCTAGGAGAAACAGGTG	up	1.48893	0.513516	down	1.05312	0.940394
BI065163	pgf1n.pk003.l7 normalized chicken fat cDNA library Gallus gallus cDNA clone pgf1n.pk003.l7 5' similar to dbj [BI065163]	A_87_P034940	GGAATGTGAACCGCCTCAATGAGAGTTTCCGGGACATGCAACTGAAGCTGCTGCACCTCC	up	1.48807	0.0700169	up	1.49054	0.127073
PXDN	Gallus gallus finished cDNA, clone ChEST428k10. [CR352808]	A_87_P018352	TCTTCATAAGGCATTCTTCTCTCCATTTCGGATTGTACATGAAGGAGGCATTGATCCACT	up	1.48795	0.0503326	up	1.40176	0.101977
BX930356	Gallus gallus finished cDNA, clone ChEST630m3. [BX930356]	A_87_P024344	AGCTGCCCCTCACCAAGTATGAGGAGCGGGTGCTGAAGAAGATCCGGAGGAAGATCAGAA	up	1.48773	0.388087	up	1.59265	0.331271
LOC423245	Gallus gallus finished cDNA, clone ChEST200i1. [CR391145]	A_87_P013691	AGTGGAAGTAAGTTCTCTTGGGTCAGTAAGACCTCTCTTCTTGTGCTTGTCAGGAATCAT	up	1.48727	0.46463	up	1.35369	0.585596
KCNJ5	Gallus gallus GIRK4 mRNA, partial cds. [U71060]	A_87_P009031	CCACCTTGAAGATGAAAACTGGATCCCTTGTGTTGAAAATCTCAGTGGATTTGTTTCTGC	up	1.48666	0.284917	up	1.60046	0.225654
STK32A	Gallus gallus finished cDNA, clone ChEST168p8. [BX950341]	A_87_P021678	AAATGCTTTTGCAGACCAGACCTTTCACCTCTTTACCTGACATTTTTCCTAATCTCAACA	up	1.48664	0.449744	down	1.16703	0.717634
TRPM2	Gallus gallus finished cDNA, clone ChEST579k15. [CR523355]	A_87_P011674	TGCCATAGGGATGATGAAGCACAGCAGAGACACTTCCCAGGGCCTCTCAGTAGCCCAGAA	up	1.48653	0.433899	up	1.09107	0.890315
IGFBP4	Gallus gallus insulin-like growth factor-binding protein-4 mRNA, complete cds. [AY230206]	A_87_P035232	CCATCGCTCAGCTGTGTAGCACCATCCTTCCTTCTTTTACGGTAAACTTGAAGCTTTGTA	up	1.48616	0.00148276	up	1.28117	0.0363978
CN224336	RJA100E06.ab1 RJbrain Gallus gallus cDNA 5', mRNA sequence [CN224336]	A_87_P020782	AAAGGCTTTTTTCTTTGAAGTTGTAACTTGGGCAGTTCAAAGTGCTGCTGGTTAAAATAT	up	1.48609	0.244122	up	1.45022	0.370239
RCJMB04_18b22	Gallus gallus mRNA for hypothetical protein, clone 18b22. [AJ720460]	A_87_P036397	TAGGGCAACGGACGTGCAGTTTTTAGACGTGGTTCAATGGAAAAGAAACGGCTCCAATTT	up	1.48583	0.13766	up	1.18043	0.54317
LOC395589	Gallus gallus myeloid ecotropic viral insertion site-1a protein mRNA, partial cds. [AF202933]	A_87_P037790	CTGTTCCAGCATCTAACACACCCTTACCCTTCAGAAGAACAGAAAAAGCAGTTGGCACAA	up	1.48576	0.207184	up	1.46284	0.232669
RCJMB04_6l18	Gallus gallus mRNA for hypothetical protein, clone 6l18. [AJ719809]	A_87_P036842	TGGGGCCCGAGCACTACGACGTGGCCCGAGGTGTGCAGAAGATCCTTCAGGACTACAAGT	up	1.48518	0.010788	up	1.25012	0.168589
ZFR	Gallus gallus finished cDNA, clone ChEST436j12. [CR387046]	A_87_P016073	CACTACCACAGATGAATCAACGCTTCAACATCCATAACAATCGTAAGAGGAGAAGGGACA	up	1.48457	0.0412903	up	1.2905	0.237485
BX931268	Gallus gallus finished cDNA, clone ChEST259b5. [BX931268]	A_87_P023991	CTTTTTGCCTTGCCTAGGCTGCAGTAAGAGGAATTTGTCTTGGGCCGTGTGTAAAGTAAT	up	1.48437	0.61812	up	1.31314	0.770885
XLKD1	Gallus gallus finished cDNA, clone ChEST156m13. [BX932088]	A_87_P023660	GCCTGAAACCACAGTAAAATGTCTAGAAGTGGAAGTTTAAGGTCAGCAGAAGTTTGAGGA	up	1.48396	0.242688	up	1.34514	0.405587
CR388590	Gallus gallus finished cDNA, clone ChEST373k5. [CR388590]	A_87_P015360	ACACAAAGCACCATCCCTCCGGAAACTGCCTATCAAGAAAGACATGAAAGAACAGGAGAA	up	1.48386	0.0244615	up	1.07849	0.722265
RCJMB04_20o8	Gallus gallus mRNA for hypothetical protein, clone 20o8. [AJ720592]	A_87_P036302	CATCCAAAACCAGGGATAAAAAGAAAGAAGAGAAAGAAAAGAAGCGCTCTAAGACTCCTC	up	1.48377	0.0280428	up	1.10665	0.430289
UNC5C	Gallus gallus UNC5-like protein 3 mRNA, complete cds. [AY187310]	A_87_P035249	AAACCCAGACCAATGAGTTACACAAGAGACATTTCAGAGAAGAAAGCAAGCAAACAAACA	up	1.48337	0.00997517	up	1.49819	0.0172794
CR524231	Gallus gallus finished cDNA, clone ChEST1010l12. [CR524231]	A_87_P011038	TTCGCATCAATAACGAGCTACAGGATTTCAAGGATTTACCACAGCAGTCGATAGGAGTCC	up	1.48303	0.0189168	up	1.39889	0.0841211
AF098468	Gallus gallus cadherin mRNA, partial cds. [AF098468]	A_87_P037904	AACAAACCTCTGGAGCCTCCTTCAGAATTCATTATAAAGGTTCAAGACATCAATGACAAC	up	1.48293	0.696393	down	1.1667	0.906643
TGM4	Gallus gallus mRNA for hypothetical protein, clone 12c19. [AJ720185]	A_87_P036579	CCCTAATATTTACAAGCCCGAGAAGAACACTGTCTACCTTCTGTTCAACCCTTGGTGTGA	up	1.48276	0.0682506	up	1.67531	0.0631762
CD215685	pgp2n.pk008.j18 Normalized chicken pituitary [CD215685]	A_87_P021381	GAACAAAACCAGCCTCTCCTTAACAACGTTTAAGTCCCGGTCCAAGATCTCCCCGTTCAT	up	1.4819	0.351804	up	1.4377	0.292639
LOC408042	Gallus gallus type II alpha-keratin IIB mRNA, complete cds. [AY574984]	A_87_P035131	GCCTTGCTCCTGTTTGTTCTTAGATGCTCCAAAAGCCTCACATCCCAGTGTTTGTCTAAT	up	1.48165	0.00696245	up	1.57465	0.00942203
LOC423134	Gallus gallus finished cDNA, clone ChEST931k18. [CR390223]	A_87_P014292	ATCGGGCAGCCCTGCAGACGGTTCAGAACCTGCACCGTGCTCAGTCCCAAAGATGGGCTT	up	1.48108	0.355742	up	1.26248	0.35487
RCJMB04_18i2	Gallus gallus mRNA for hypothetical protein, clone 18i2. [AJ720475]	A_87_P036386	TGAAAGTGCATGTTCCACATGCTGTTCAATGAAGAATACCCTCCCCGAAACACACAGGTT	up	1.48108	0.00331296	up	1.17486	0.100572
CV860388	gonad_EST07864 Embryonic gonad cDNA Library Gallus gallus cDNA 5', mRNA sequence [CV860388]	A_87_P010248	GGCAGCCGTTAACTTACGGAAACTATGTAACTGGGTTGATTTAAATGAGTATAATGTTCA	up	1.48062	0.306598	up	1.34585	0.477421
PRKCD	Gallus gallus mRNA for hypothetical protein, clone 11g12. [AJ720142]	A_87_P036614	ACCATGTATCCAGAATGGAAGTCTACTTTTGATGCCCACATTTATGAAGGACGCGTGATT	up	1.48046	0.0686656	up	1.43374	0.078148
TC215512	Q08516 (Q08516) Gallus gallus POL-like (Fragment), partial (11%) [TC215512]	A_87_P003300	TAGGATACAGTGCAGCACTATGTCATCCTTAATCCAATATATAGTCACGTTACCAGAAAT	up	1.48046	0.242904	up	1.87831	0.135548
CR523869	Gallus gallus finished cDNA, clone ChEST929j19. [CR523869]	A_87_P011314	CTGGTCAGATCCTGAGAAGAGAAACCAATGTTGTTGAGAAGCTGATGTCTCCTCTCACTT	up	1.47943	0.300669	up	1.0606	0.898071
BX931265	Gallus gallus finished cDNA, clone ChEST262j19. [BX931265]	A_87_P023992	GATCTCGCTCTCATCTTACAGCTTGTTCAGAATACTGATTTTCAGAATGCATTTAAGATA	up	1.47913	0.432731	up	1.41729	0.498539
QKI	Gallus gallus RNA binding/signal transduction protein QkI-4 mRNA, complete cds. [U86767]	A_87_P009003	AGCGAGCTGGGGCACTTGTCCCGTTCGTCTTACATCTAACAAAACAGACAAAGAAATTGT	up	1.47797	0.0412157	up	1.3742	0.135784
CR524447	Gallus gallus finished cDNA, clone ChEST447b16. [CR524447]	A_87_P010890	AACAACGAATCCAACGTCAACACAGATGACTAAAAGGGGCCTGTATGTGTCAAACATGAG	up	1.47789	0.271006	up	1.29313	0.483146
RCJMB04_25c15	Gallus gallus mRNA for hypothetical protein, clone 25c15. [AJ720767]	A_87_P036193	TGCCTACGTGACTCATTTAAAAAAGGGAAATATGTGAAGGGAGTGAGGAGTCTGCGAGAA	up	1.47758	0.392534	up	1.57646	0.376452
NT5C3L	Gallus gallus mRNA for hypothetical protein, clone 11c18. [AJ720128]	A_87_P036625	CATGCGCTGCTAAACGTCACTTCTGGACAGTGCAGATCTCCTCTGCTTCATTGAAATAAA	up	1.47679	0.0224911	up	1.22532	0.0853457
BX935968	Gallus gallus finished cDNA, clone ChEST435a8. [BX935968]	A_87_P021863	AGGAGAACATCGATGACTGTCCAGGGAACAACTGCAGGAATGGGGGCACCTGCGTGGATG	up	1.4764	0.158023	up	1.18241	0.471569
LOC419738	Gallus gallus finished cDNA, clone ChEST313g12. [CR353052]	A_87_P018194	GTGCGTTATTACCTCAACCTGGTGCTGATTGATGAGGAAGAGAGACGCTACTTTAAACAG	up	1.47618	0.00917014	up	1.22578	0.31248
AKR1A1	Gallus gallus mRNA for hypothetical protein, clone 12g8. [AJ720200]	A_87_P036566	CTGCTCAGCTATCAGCTTCAGTATCTTCATTAATACTTTATACAAGGAATACAGCGAAAT	up	1.47602	0.0632709	up	1.38344	0.285669
LRRC3B	Gallus gallus finished cDNA, clone ChEST127l8. [CR386255]	A_87_P016607	CATTCCTCAATGCTGCCAATGATGCTGACCTCTGTAACCTTCCCAAAAAGACTACTGATT	up	1.47595	0.351772	up	1.3791	0.493351
RSN	Gallus gallus cytoplasmic linker protein CLIP-170 mRNA, CLIP-170(11) isoform, partial cds. [AF045650]	A_87_P037965	TTGTTGGATGCAGAAGAGGCACTGAAAGCTGCACAAAAGAAAAATGATGAGTTGGAAACA	up	1.47583	0.00448327	up	1.20398	0.132961
LOC422860	Gallus gallus finished cDNA, clone ChEST550h15. [BX931918]	A_87_P023739	AAGTGAAGTAACTAAAGACAGAAGTAATAAAGTACCTGCCGCTGTACACGAAAGAACGCA	up	1.47504	0.127857	up	1.06884	0.772667
LOC395379	Gallus gallus ephrin-A6 mRNA, partial cds. [AF317286]	A_87_P037694	TGTAATAAACCCTTCGCTCCGTTCGTCCCCGTTCGGTTCTCCGAGAAGATCCAACGCTTC	up	1.47501	0.0710883	up	1.24606	0.145617
CN237657	RJB138A09.ab1 RJtestis Gallus gallus cDNA 5', mRNA sequence [CN237657]	A_87_P020430	AGTTTAGAAGGTCTCCAAGCACAGGCTCCAAAACCTGCGGGCACCCTGTGCTGGTGATCA	up	1.47501	0.45311	up	1.3124	0.674816
CN226951	RJB008B06.ab1 RJtestis Gallus gallus cDNA 5', mRNA sequence [CN226951]	A_87_P020737	CTCACTACCAGAAATATACATTGCGGCCCTGGAGCATGTCCAGAGAAAGGCAATAAAACT	up	1.47462	0.504122	up	1.15715	0.853068
BG712863	pgl1n.pk014.e20 Normalized Liver Library Gallus gallus cDNA clone pgl1n.pk014.e20 5' similar to no significant hits (pLog(P) 4)T, mRNA sequence [BG712863]	A_87_P034951	GGTCTCCAGCATCTTCATGGGCAAGAACATGCTGGCCATCGGGCTGAAGGTCTGCATGTT	up	1.47369	0.0209842	up	1.03166	0.836396
TNRC6B	Gallus gallus finished cDNA, clone ChEST659e19. [BX933514]	A_87_P022988	CTGCCAGGAAGCACCACTAGTAACAAAGGAAAAGGAAGCCAGTGCCAGTCTGGAAGCGCT	up	1.47355	0.114035	up	1.10575	0.792697
HSPB2	Gallus gallus mRNA for small heat shock protein B2 (HSPB2 gene). [AJ616735]	A_87_P037228	GCCAGGATCATCGAAGTGAAGATAATCCAGGAGCAGACGGTGGGGCAGAAAGAACTGTCT	up	1.47313	0.198518	up	1.66668	0.122117
WPKCI-8	Gallus gallus ASW (ASW) mRNA, complete cds. [AF148455]	A_87_P037860	TGGAGGGTAATGAAAAGCTTTGAGCAGCATTGCAGAATAAAGATGGAGCATGGGGATATC	up	1.47304	0.0532241	up	1.36439	0.132961
PDGFC	Gallus gallus SCDGF mRNA for spinal cord-derived growth factor, complete cds. [AB033829]	A_87_P038170	CTGGCTGTTTCATTTCTACACCTCCAGAACATCTGGCCCCTAGCTGAAAACATCTGAAAT	up	1.47283	0.0586985	up	1.4335	0.0942302
FGF-8	Gallus gallus fibroblast growth factor 8 (FGF-8) mRNA, complete cds. [U55189]	A_87_P009058	ACCGGCGCTTCGAGTTCCTCAACTACCCCTTCAACCGCAGGAGCAAAAGGACTCGAAACT	up	1.47272	0.582991	up	1.38175	0.678093
TIAL1	Gallus gallus TIA-1 mRNA, complete cds. [AY189903]	A_87_P035246	ATAATGGAAATCCGAGTCTTCCCAGATAAAGGCTACTCCTTTGTACGGTTTAATTCTCAC	up	1.47152	0.000891615	up	1.33856	0.0271918
PLAGL1	Gallus gallus finished cDNA, clone ChEST763e22. [BX929924]	A_87_P024524	TCCATCCACTACAAATTCTGTAACATTGCCTCATTTTCATCATGCCTTCAAATAACTATG	up	1.47109	0.166126	up	1.93759	0.0442729
LOC416892	Gallus gallus finished cDNA, clone ChEST665c19. [CR390553]	A_87_P014077	GGCTGTTGCGGTGCTCAGTGCAGCCAAACCCATCGCTTGTGCTCTCTCCATGGGTGCTTT	up	1.47104	0.00730506	up	1.25305	0.0526523
BX932207	Gallus gallus finished cDNA, clone ChEST362a18. [BX932207]	A_87_P023595	TTAGTAAAGGAGGCTTTGCACAGAGAAACACAGGCCCTGTTATCCAGGCTGAGTCAAATA	up	1.471	0.242115	up	1.56071	0.234973
CR353732	Gallus gallus finished cDNA, clone ChEST235p16. [CR353732]	A_87_P017751	TGAAGACCCACGTAAGCAGTCTAACAAGGTGTCAAGTTATGCCACACTTTTTGCTCAAGC	up	1.47086	0.374451	up	1.44807	0.445617
BX930606	Gallus gallus finished cDNA, clone ChEST371b1. [BX930606]	A_87_P024235	ATCGCTCCGGACTCTCAGCCTCCCCCCTTTTGGGGGAGAAGTGTACAGGTTTGGGTAAAA	up	1.47081	0.0122975	up	1.27166	0.0955515
CR354156	Gallus gallus finished cDNA, clone ChEST385h7. [CR354156]	A_87_P017506	GTGCAGAAAGCCTCTATGTTCAAGGCATGGAGCTGTTTGAGGAGGCCCTGCAGAAGTGGG	up	1.47076	0.507724	up	1.38446	0.594726
BX935542	Gallus gallus finished cDNA, clone ChEST84d18. [BX935542]	A_87_P022089	TGCCATGAGTCTTGCAGAGACTGTGAGGTCTCATTTATAACTGTTGCAGTTCACTGCTAA	up	1.4707	0.0185932	up	1.35678	0.16163
RCJMB04_1e13	Gallus gallus mRNA for hypothetical protein, clone 1e13. [AJ719306]	A_87_P037182	GGAAGTTTGGCTTTGAGATCATTGAGACGAAGAAGAACTACTACAAGAGGATAGAGCCTG	up	1.47047	0.0256206	up	1.37401	0.0507662
CO769357	testis_EST00454 Testis cDNA Library Gallus gallus cDNA 3', mRNA sequence [CO769357]	A_87_P019408	CCCCCCTCAACCCCCTGCAGAACCGGGAAAGAATGACTGAGATCATGTTTGAGGGCTTCA	up	1.46982	0.0360069	up	1.35373	0.215877
CN210842	WLA104A08full WLbrain Gallus gallus cDNA 5' and 3' similar to Drebrin-like (Dbnl), mRNA sequence [CN210842]	A_87_P020874	TCTGCAGGGTGAAGGACCCCAACTTCGGCCTGCCCAAATACGTCCTCGTCAACTGGACAA	up	1.46978	0.315553	up	1.33099	0.506195
TAOK1	Gallus gallus finished cDNA, clone ChEST404o20. [CR352942]	A_87_P018270	AGCCATGGAAAAAGAGGCTAAAGTGATGGCCAACGAAGAAAAGAAGTTTCAACAGCATAT	up	1.46948	0.00868877	up	1.36198	0.158917
ELF-1	Gallus gallus ELF-1 mRNA, complete cds. [L40932]	A_87_P009460	CCCTCTATGAGTCCCCAGAGCCCATCTTCACCAGCAACAACTCGTGCTGCAGCCTTGCAG	up	1.46895	0.271977	up	1.64234	0.236742
SSRP1	Chicken CIIDBP (homologous to human SSRP-1 and mouse T160 genes) mRNA, 3' end. [L08815]	A_87_P009516	GCAAGGAATTTGTCTCCAGCGATGAGAGTTCCTCTGCAGAGAGCAAGAAGGAGGACTCAG	up	1.46807	0.0706494	up	1.3465	0.168655
AJ414706	AJ414706 Gallus gallus thyroid Gallus gallus cDNA clone 6.2.1.E2, mRNA sequence [AJ414706]	A_87_P037393	AGAGACTCAGGCTGGGAGGGCAGTATTTCTTTTTGTTATTGTCAACCTTTCTTTGTATTT	up	1.46728	0.208282	up	1.1996	0.607033
CD99L2	Gallus gallus finished cDNA, clone ChEST43g3. [BX933528]	A_87_P022985	GGCATTGTGGATGATGGCTACAGCCCTGACAAGAAGAAAGGATCTGGAGGCAACACTGAC	up	1.46707	0.0460377	up	1.3879	0.112032
GSTT1	Gallus gallus liver theta glutathione-S-transferase mRNA, complete cds. [U13676]	A_87_P009143	CACAGCCTTCACATAATTGCCTACTTGAATATCCTCTGTTGATATTATACATGGAATACT	up	1.46646	0.0665421	up	1.22438	0.313436
PLXNB2	Gallus gallus finished cDNA, clone ChEST791o8. [CR391588]	A_87_P013350	CTTCTGGAAGATGAAAATAAGGTCTGGCACCTAGTCCGGCCCGTAGATGAAATTGATGAA	up	1.4653	0.0118508	up	1.1455	0.276529
CR407083	Gallus gallus finished cDNA, clone ChEST743j18. [CR407083]	A_87_P012312	TACCATAAACATCCTGCTCTATGATGACAACAGCATAATGACCTTCAACCTCAGCCAGTT	up	1.46518	0.498306	up	1.31004	0.658762
BX935179	Gallus gallus finished cDNA, clone ChEST863e14. [BX935179]	A_87_P022226	GCTGTTGAGGATGAGATTGAATTGCTCAAGAAACTGGTGCCTGAGATGGTGAGGTTTGAA	up	1.46489	0.00990605	up	1.12291	0.585355
BX934711	Gallus gallus finished cDNA, clone ChEST110h13. [BX934711]	A_87_P022462	GAGACCAGTGCCTGCAGCAACCTGAACATAAAGGAGTCCTTCACCCGGCTGACGGAGCTG	up	1.46429	0.0236395	up	1.4075	0.0629124
TRPC4	Gallus gallus finished cDNA, clone ChEST1016c5. [CR338853]	A_87_P018797	TGAATAAAGATGCCTCCTCTCTGTCAGAAACTGAAGAAAAGAATGAGAGCGAAGGAAACA	up	1.46391	0.161789	up	1.42967	0.223783
AJ445631	AJ445631 riken1 Gallus gallus cDNA clone 10p4r1, mRNA sequence [AJ445631]	A_87_P037336	CAAAATTTGTGGAGATCTTGGATGAGAGGAGCAAAGAGTACTCCATTGCTGGGGATGACT	up	1.46374	0.226219	up	1.20276	0.572124
CN228785	RJB061A05.ab1 RJtestis Gallus gallus cDNA 5', mRNA sequence [CN228785]	A_87_P020674	ACTTCAGGAAACTCTTGAGGCAATTAGGAAGGGCTTTGTATTAGCAGCAATCACTGTTTG	up	1.46283	0.169762	up	1.33985	0.300635
BM440727	pgr1n.pk003.p17 Normalized Chicken Reproductive Tract cDNA Library (pgr1n) Gallus gallus cDNA clone pgr1n.pk003.p17 5' similar to dbj [BM440727]	A_87_P034862	ATGACCAAGACCGGGCGCAAGAAAGCCAACTACTACGGCTCGCTGCTGCAGGCCTCCACT	up	1.4625	0.327248	up	1.27306	0.474559
BX931064	Gallus gallus finished cDNA, clone ChEST698l15. [BX931064]	A_87_P024085	GAAATTGCTTTATCTAGAGAACTCTCCTCTGTCAGACACAACAACAAGCAGTGGCGGTGA	up	1.46215	0.043879	up	1.339	0.0479186
NODAL	Gallus gallus nodal-related protein 1 precursor, mRNA, partial cds. [AF486810]	A_87_P037590	TGCCGTGCCCTGCCTGCTCGCCCATCAGGATGAGTCCCCTCTCCATGCTGTACTATGAGA	up	1.46213	0.037686	up	1.22092	0.181705
RCJMB04_5a10	Gallus gallus protein kinase C-like mRNA, partial sequence. [AY393837]	A_87_P035176	TCTGTGGCATTGGATCACACTGAGAAAAGGGGAAGGATTTATCTGAAGGCTGAAGTCACT	up	1.46199	0.328217	up	1.50922	0.33723
RASGEF1C	Gallus gallus finished cDNA, clone ChEST988k13. [BX929466]	A_87_P024710	CAAGCCTTGTTTCAGTGACCAGAAGACCAGTAACCTTGAGGCCTATGTGAAATGGTTCAA	up	1.46141	0.441196	up	1.02939	0.966763
CN220586	WLA019B12.ab1 WLbrain Gallus gallus cDNA 5', mRNA sequence [CN220586]	A_87_P020822	GAGCTGACGCGCAAATACGTGGCGCGCTACAACAACAACAACGCCGTCAAGTCGCTGGTG	up	1.4613	0.327242	up	1.43713	0.389986
CR385540	Gallus gallus finished cDNA, clone ChEST973f17. [CR385540]	A_87_P017082	CAAAGGGAGGGGAAAAGAGGGGTACGGCAAAACCCTGTAACAAAGTTTCTGAAATAAAAC	up	1.46119	0.125315	up	1.4511	0.0704248
PLAU	Chicken urokinase-type plasminogen activator (downA) mRNA, complete cds. [J05187]	A_87_P009536	TTACCATTCACCTGATATGATATGGACACTTTTGCCCCTCAAGACTTCTGCTGATTTTAT	up	1.46086	0.0085163	up	1.47889	0.0559059
RCJMB04_11o9	Gallus gallus mRNA for hypothetical protein, clone 11o9. [AJ720167]	A_87_P036591	GTATACACTGGAGACTGCATTGTTTTGATTCAACATGTGTGCATCAGAATAGTCTTTGAA	up	1.46084	0.122974	up	1.22895	0.527518
BX932798	Gallus gallus finished cDNA, clone ChEST713c11. [BX932798]	A_87_P023351	TCTTGCTGTTTATGCTGAAGTTTGTATATTAGCCCTAAAGGACAGCATCTCTTCAAATTG	up	1.46077	0.244681	up	1.52908	0.258452
CR353496	Gallus gallus finished cDNA, clone ChEST249o6. [CR353496]	A_87_P017903	GGTATCAGAGCTGGAACGCACTTTATTCTCCATCTCCATGCAGCAAAAACAGTCAGAGAA	up	1.46054	0.099715	up	1.29817	0.271349
CR390997	Gallus gallus finished cDNA, clone ChEST544g20. [CR390997]	A_87_P013794	AAACAAACATAGAAATGAGCAGGCGTTTCCTGGAGTGAACAGTTCACAGCACAAGAACAG	up	1.46051	0.0244091	up	1.554	0.0655965
SMYD1	Gallus gallus cardiac and skeletal muscle-specific BOP1 mRNA, complete cds. [AF410781]	A_87_P037633	AAGATGAGGGAAGCTGCCCTCAAAAACCAAAAGATTCAAGTCATGCCTGAACCCAGCAAT	up	1.46038	0.0122258	up	1.63632	0.0185378
RCJMB04_19e2	Gallus gallus mRNA for hypothetical protein, clone 19e2. [AJ851701]	A_87_P035599	TCGTTTATGTTTTGTTTAAAACCGTTTCTTTTTTGGCATTCTGTTTGTTGGAGAACTCCG	up	1.46002	0.0247469	up	1.15946	0.292711
BX931537	Gallus gallus finished cDNA, clone ChEST388e19. [BX931537]	A_87_P023889	AAACACAGCTCCAGTTTAATAGGAATGTTCCAGCAGTTCCGGAAAACTTATCTCTCAGAT	up	1.45919	0.472083	up	1.32765	0.599173
CR388762	Gallus gallus finished cDNA, clone ChEST886h16. [CR388762]	A_87_P015256	AGAACTACTGACAAGGTAACCTTCAGTAAGATTTTAACCAAGCGGTTTCTTATTTGCTTC	up	1.45871	0.0113047	up	1.25491	0.0920176
DN929576	4155237 BARC_3GAL chicken mixed tissue Gallus gallus cDNA clone 3GAL_51O06 5', mRNA sequence [DN929576]	A_87_P009717	AACAAAATTCACCCATTTACATTTCCCGCATAATTCCTGGAGGAGTGGCAGAAAGGCACG	up	1.45871	0.0541778	up	1.1799	0.351771
LOC395288	Gallus gallus hemopexin mRNA, partial cds. [M37319]	A_87_P009343	TGGGATAAGCGCATGTATCTGATCCAGGGCTCGCAGGTCTCCATCTACGTCTCGGGTAGA	up	1.45865	0.0309947	up	1.17286	0.372924
HSPCB	G.gallus hsp 90 beta mRNA for heat shock protein 90 beta. [X70101]	A_87_P008853	AGAGTCCTTTCTCTCCAGCGCCCCCAGAGTAGGATTGTATTTTGATTGGCTTGGTTATTT	up	1.45849	0.00641075	up	1.36563	0.0531992
MSH6	Gallus gallus finished cDNA, clone ChEST39d21. [CR390060]	A_87_P014394	GCCCACACAACCAAGTTTGACAAGGTTGTACGTCGGGAAATCTGCAGAATCATTACCAAA	up	1.45829	0.126058	up	1.06925	0.805789
CD217761	pgr1n.pk004.l21 Normalized chicken reproductive tract cDNA library (pgr1n) Gallus gallus cDNA clone pgr1n.pk004.l21 5' similar to gb [CD217761]	A_87_P021368	TGGGAAGGAAACCTTTGTCAAGCTCAACGTGCACCATCCCCCGACTGTCACCCTGTCCAT	up	1.45802	0.216062	up	1.39539	0.268662
S100A11	Gallus gallus calgizzarin mRNA, complete cds. [U77733]	A_87_P009018	AATATGGAAACAAGTCACAACATCCCCACTCCTTGTTTTTTATGAATAAAGGTTTAAAAT	up	1.45761	0.0129725	up	1.20998	0.12127
LOC418554	Gallus gallus finished cDNA, clone ChEST825j13. [CR352572]	A_87_P018503	TGAGCTCAATTTTTAAAGCAAATCTTCACTCAGTTGCTCTCTATTCCTTGCTTTTCTTGG	up	1.45747	0.68912	up	1.62372	0.623413
CN229280	RJB069C09.ab1 RJtestis Gallus gallus cDNA 5', mRNA sequence [CN229280]	A_87_P020649	TCTGCTATGAGTTCATCTTCGCCCCTGGTGCCTCCCGGGAGAAGCTGTGTGCCTGCCTCA	up	1.45727	0.0904389	up	1.10314	0.637925
SLC7A6OS	Gallus gallus finished cDNA, clone ChEST382j22. [BX934607]	A_87_P022515	TCAAGTTCCAGCTGAAATATATGAAGATGAAGACGATGAAAATGATGAAGATAACTGGCG	up	1.45678	0.218195	up	1.39779	0.28723
AI981051	pat.pk0040.e9.f chicken activated T cell cDNA Gallus gallus cDNA clone pat.pk0040.e9.f 5', mRNA sequence [AI981051]	A_87_P037554	AGCTTTAGCTCAATGATACTCAACTCCGCAGCAGTCACCTTCGTGGAAGAGCTGCATGGT	up	1.45617	0.174058	up	1.49403	0.166504
BX933728	Gallus gallus finished cDNA, clone ChEST425h13. [BX933728]	A_87_P022896	ATGGGAAGGTCACAACAGAAGAATTCATGAACTACTATGCAGGAGTCAGCGCCTCAATAG	up	1.45615	0.0555811	up	1.66294	0.0428699
CR352683	Gallus gallus finished cDNA, clone ChEST35g14. [CR352683]	A_87_P018436	AGAAGAAGGAGAAGATGGGCTTTGGCTCCATCTCACGGGTGTTCGCCCGGGGCAAGCAGC	up	1.45526	0.0924522	up	1.29503	0.0755618
SYT12	Gallus gallus finished cDNA, clone ChEST488d24. [BX936066]	A_87_P021815	CACTGCACCAGGGCTGAAACCCTTCAAATTCCAAGGAAAAAGGGAAAAATAATAGTAGAA	up	1.45521	0.102405	up	1.78645	0.0255062
LOC421968	Gallus gallus finished cDNA, clone ChEST713p5. [BX932813]	A_87_P023339	TTCTATATGAGGGGAGTAATTTAGCTCATTCCTTAGTTGCTGCTGGCCACGCAGTCTACT	up	1.45517	0.642957	up	1.00034	0.999704
CO764230	brain_EST07422 Brain cDNA Library Gallus gallus cDNA 3', mRNA sequence [CO764230]	A_87_P019789	CGTGCTGATCTGATTTTCACAGTTGATTTTGAAATAGCTACCAAGGAAGACCCACGTAGT	up	1.45437	0.0110504	up	1.05729	0.637401
AJ720382	Gallus gallus mRNA for hypothetical protein, clone 16g22. [AJ720382]	A_87_P036447	ACACGGAACCCAGTATGGAGGTCTTCAGCTACCATGAAGGACTGAAGAAGTGGGTGGAGG	up	1.45425	0.0309864	up	1.2046	0.141886
CR385278	Gallus gallus finished cDNA, clone ChEST547a24. [CR385278]	A_87_P017224	ACTATGTGAAGAAGGTGGCAGGCGTTGAATCCGTTGGCTTTGGCGGGGACTACGATGGTG	up	1.45375	0.207184	up	1.00007	0.999738
CN225142	WLA067F07.ab1 WLbrain Gallus gallus cDNA 5', mRNA sequence [CN225142]	A_87_P020769	GTGTATGAGAGCGGCAGCAATGTGGACCAGTTTGTCACCCGCTTCCTGCTGAAGGAGACA	up	1.45357	0.345753	up	1.23546	0.625514
SFRP2	Gallus gallus secreted frizzled-related protein-2 (Sfrp-2) mRNA, complete cds. [AF218056]	A_87_P037775	ACCATCTGTAGCCTAACTGTAACATACCTAGTGGCTAACCTAACCTGAAAAAGTTGTAAA	up	1.45341	0.0668368	up	1.25833	0.27377
AJ734809	AJ734809 riken1 Gallus gallus cDNA clone 7j7r3, mRNA sequence [AJ734809]	A_87_P035871	TACAGGTGAAATGTGAAACTCCAAACTGCCCTTTCTATATGTCTGTGAACACCCAGCCCT	up	1.45334	0.471266	up	1.93573	0.257584
CO773496	testis_EST04593 Testis cDNA Library Gallus gallus cDNA 3', mRNA sequence [CO773496]	A_87_P018987	GACTGAGGACGTCCCTGTGAGAGAGATTTTGAAAAACAGACTGAAACATGGATTTTCCCC	up	1.45325	0.10024	up	1.20972	0.381668
LOC408037	Gallus gallus 14-3-3 sigma mRNA, partial cds. [AY574989]	A_87_P035127	TCGAGCACAAAACCGAGGAGGGCGACGACAAAGCGCAGCTGGTGAACGAGTACCGGGAGA	up	1.45312	0.0241465	up	1.30821	0.0631122
HS2ST1	Gallus gallus cHS2ST mRNA for heparan sulfate 2-O-sulfotransferase, complete cds. [AB093516]	A_87_P038104	TGAGGTATTGGTGAATCCATATTATGACTCCACTAGTGAGCTGTGGTATGGTTAGGGTTT	up	1.45274	0.0783408	up	1.34111	0.174845
RARRES2	Gallus gallus finished cDNA, clone ChEST462l6. [CR385440]	A_87_P017133	GAGGCCGGCAAGATGAGTGATGTCCTCTATCTGCCAGGCATGTTTGCTTTCTCCAAGGGG	up	1.45232	0.0223745	up	1.31582	0.0920018
PRRX2	G.gallus Prx-2 (S8) mRNA. [X79695]	A_87_P008821	CCAAGCGATCAGGAATTTGCTTCCAAACATGGAAGGATCTTGGACTTTTGGATTTGACCA	up	1.45228	0.133166	up	1.29198	0.189843
CSK	Chicken src kinase (CSK) mRNA, complete cds. [M85039]	A_87_P009285	ACCGGCCGTCCTTCCACCAGCTCCGTGAACAGCTAGTGCATATCAAAGAGAAGGAGCTCT	up	1.45216	0.0567278	up	1.16281	0.208525
CETP	Gallus gallus CETP mRNA for cholesteryl ester transfer protein, complete cds. [AB205527]	A_87_P038046	AAATTATCTAGAATCACACCACAAGGGCCTCGTCCTGTACAAGAACTACTCTGACGTCCT	up	1.45187	0.638286	up	1.73279	0.498906
CO771905	testis_EST03002 Testis cDNA Library Gallus gallus cDNA 3', mRNA sequence [CO771905]	A_87_P019158	AGAAAATTACTTTAAAATCGGTGTCTAAACACCAGAAAACTATGTTGTGGAGAGAAGACC	up	1.45167	0.262813	up	1.24656	0.501532
GCK	Gallus gallus pancreatic glucokinase mRNA, partial cds. [AY256906]	A_87_P035222	TGGACGGCTCTGTCTACAAGCTGCACCCCAGCTTCAAGGACCGTTTCCACGCCACGGTAC	up	1.45158	0.0749905	up	1.26582	0.237485
LOC396389	Chicken netrin-1 mRNA, complete cds. [L34549]	A_87_P009475	AAGGTGAAGCCCATGAAGAAGTACCTCCTGCTGGGCAGCACCGAGGACTCTCCCGACCAG	up	1.45141	0.147639	up	1.11885	0.234156
LOC395957	Gallus domesticus mRNA for syntaxin1B, complete cds. [D45206]	A_87_P009777	TTTCGTCGTTGTTCTTGGGGTGGTTTTGTCCCCGGTCATTTGTGGCACTTTGGGCCTATA	up	1.45088	0.695416	up	1.50111	0.685477
PNOC	Gallus gallus finished cDNA, clone ChEST781a9. [CR524424]	A_87_P010907	AGAAGAGGTTTAGCGAGTTCCTGAAGCAGTACCTGGGCATGTCGCCCCGCTCCACGTTCC	up	1.4507	0.518304	up	1.05155	0.942657
RCJMB04_18k10	Gallus gallus mRNA for hypothetical protein, clone 18k10. [AJ720479]	A_87_P036382	TCATCCTCATTCTGTTAGTTCGTATTGTAGCTGAGCTGTAATTTAAAATGCTGGAGGATC	up	1.45068	0.0268543	up	1.34428	0.0898407
HOXB3	Gallus gallus homeo box B3 (HOXB3), mRNA [NM_204743]	A_87_P009209	CATGTAACTAACTACCAAAACCCCATCAAAGGTGCCCTCCAACAGAAGTACACCAACACG	up	1.45045	0.466949	up	1.63835	0.360952
CN228414	RJB053H11.ab1 RJtestis Gallus gallus cDNA 5', mRNA sequence [CN228414]	A_87_P020691	GAAACATCAGTGCAGAACAGCCACGAAAAGTTGTTCACACACACCAAAGACGCGTGAATT	up	1.45044	0.0383242	up	1.24634	0.129944
AGT	Gallus gallus finished cDNA, clone ChEST141l17. [CR407474]	A_87_P012046	AACGGCAATGACCTGGACAAAGTAGAGGCCAAGCTTCCTTTGCAGTCATCAGCCTGGCTT	up	1.45012	0.578717	up	1.4776	0.612533
RAPSN	Gallus gallus rapsyn mRNA, complete cds. [AF000138]	A_87_P038031	TGTGGCATGTGTGGAGAGTCTATTGGGGAGAAGAACAACCAACTGCAGGCGCTGCCTTGC	up	1.44929	0.108614	up	1.7664	0.0572299
CR389380	Gallus gallus finished cDNA, clone ChEST982i22. [CR389380]	A_87_P014861	AGTTCCATGGAAAGCAATCAATAAACGACTACAGTGCATCTTTCCTACAAGAACCTCCTT	up	1.44852	0.0114682	up	1.25874	0.143008
RCJMB04_21l11	Gallus gallus mRNA for hypothetical protein, clone 21l11. [AJ720618]	A_87_P036288	ATGTCTGGTCTGAATGCACAAGCCCACAAAGCTTGCAGAAACATTTCTTCATTGAGCTGT	up	1.44832	0.0186867	up	1.24553	0.0742763
TLL1	Gallus gallus mRNA for colloid protein. [AJ012462]	A_87_P037518	ACTTCACTTTCACACTGATGATACAATCAACAAGAAAGGATTCCATATACGATACAGAAG	up	1.44773	0.166549	up	1.3138	0.28759
BX935362	Gallus gallus finished cDNA, clone ChEST507e14. [BX935362]	A_87_P022172	TAGCATTCTGTGGTGGAGGCTACTGCCCTTCAAAGTTTGGGGTAGAAGGATTTAATGACA	up	1.44772	0.592021	up	1.70508	0.390831
RCJMB04_5e12	Gallus gallus mRNA for hypothetical protein, clone 5e12. [AJ851534]	A_87_P035705	CCTCAGTGATGGAATATCATGAATGTGAGTCATTATGTAGCCGTCGTACATTGAGCAAAA	up	1.44764	0.0134037	up	1.36062	0.0592464
AMOT	Gallus gallus finished cDNA, clone ChEST47j10. [BX933557]	A_87_P022970	CTTGCGGAGAAGGAATTTGAGGGGTCTGAAGACAATCGGAAAACCATCTCTCAACTCTTT	up	1.44748	0.0582135	up	1.28747	0.114118
AP1G1	Gallus gallus mRNA for hypothetical protein, clone 20c5. [AJ720551]	A_87_P036331	TGCACTCTTGGCTGCATGGGCTCCTCAGAAATGTGCAGAGACCTTGCAGGAGAGGTCGAA	up	1.44679	0.156748	up	1.1023	0.784423
LOC416149	Gallus gallus finished cDNA, clone ChEST551h18. [CR385299]	A_87_P017210	CTTTCTGGAGGATGGTGGAGGACACCCTGCAGCAGTCAGGCGTCCAGCTCCGTACCTTCA	up	1.44657	0.0663755	up	1.26883	0.298884
BMP4	G.gallus mRNA for bone morphogenetic protein 4. [X75915]	A_87_P008832	CACGGAGCTGAGCGCCATCTCCATGCTCTACCTGGATGAGTATGACAAGGTGGTGCTGAA	up	1.4463	0.00696245	up	1.20145	0.0980944
ALAS1	Chicken mRNA for mitochondrial 5-aminolaevulinate synthase. [X02827]	A_87_P008981	ATCCTACTTCAGTGGCATGAGCAAACTATTATCTGTCAGTGCATGAGAGTAACAGTGTTA	up	1.44627	0.00102311	up	1.53324	0.00922619
HK2	Gallus gallus HK2 mRNA for hexokinase2, complete cds. [AB083370]	A_87_P038115	CCGCATCTCAGAGCGGCTCAAGACCAGAGGGATCTTCGAGACAAAGTTCCTGTCCCAGAT	up	1.44595	0.2573	up	1.53002	0.179274
AJ441451	AJ441451 dkfz426 Gallus gallus cDNA clone 10j24r1, mRNA sequence [AJ441451]	A_87_P037383	GCAGGTGACCCTCTTGGAGAGGCACGTGTAAGCGGAGGCTACGTTTGGCTGGCTGGATCT	up	1.4457	0.58742	up	1.39535	0.692526
CR352678	Gallus gallus finished cDNA, clone ChEST999g16. [CR352678]	A_87_P018440	TGAACAACATTACTAAGCTGCCCTCGAACCCCGTGCACAATCTCCGCTTCCTGGAAGAGC	up	1.44526	0.480862	up	1.34431	0.634046
CO770346	testis_EST01443 Testis cDNA Library Gallus gallus cDNA 3', mRNA sequence [CO770346]	A_87_P019300	CTAGGGCCAAACAGAGTTGTGAAGATTGAAACAGCACACAGGCACTGGCCTCGTCTCCTG	up	1.44509	0.0040063	up	1.16867	0.204075
RCJMB04_13j5	Gallus gallus mRNA for hypothetical protein, clone 13j5. [AJ720255]	A_87_P036531	GCAGTCTTGCTGAAGGTAAAAGGCAACACACCTCTTAGGCAAAGCCAGGAGTTTATTGTA	up	1.44494	0.13315	up	1.36002	0.222805
U00923	Gallus gallus myosin binding protein C (MyBP-C) mRNA, partial cds. [U00923]	A_87_P009169	AAGAGCGAATACGAACGGATCGCCTTCCAGTACGGCATCACCGACCTCAGGGGCATGCTC	up	1.44477	0.471014	up	1.78638	0.296129
CR385749	Gallus gallus finished cDNA, clone ChEST198k2. [CR385749]	A_87_P016950	AAACTACGACAAGTGGGAGATAGAGAGAACTGACATCACTATGAAGCACAAGCTTGGCGG	up	1.44463	0.123284	up	1.40085	0.219266
KIF1B	Gallus gallus finished cDNA, clone ChEST81a4. [BX950339]	A_87_P021679	TAAAGGAAGGAGCAAATATAAACAAATCTCTCACGACTCTGGGCAAAGTTATTTCAGCAT	up	1.44437	0.0829396	up	1.15495	0.536541
BCL2L1	Gallus gallus bcl-x (bcl-x) mRNA, complete cds. [U26645]	A_87_P009116	TTTCCGTTGTGTTTTAAAGGCGGTGAGAGCGATGCAGCACTTCAGCCAACGGCTCCCAGT	up	1.44435	0.014902	up	1.46813	0.00371638
AGO61	Gallus gallus mRNA for glycosyltransferase (AGO61 gene). [AJ868536]	A_87_P035512	AACCACACCTTCTCAGAAAACATTAAGCCCTTCACAATATACCTGGTGTGGATACGCTGC	up	1.44384	0.510846	up	1.64321	0.451579
OG9X	Gallus gallus finished cDNA, clone ChEST588j5. [BX930180]	A_87_P024407	CCGGCAGATTTCCCCGTATCGGATATTAAAGCGTGTTCACAGAGGGGCTTAGCTGCCATC	up	1.44318	0.293956	up	1.37765	0.466901
DMD	Chicken mRNA for dystrophin (Duchenne muscular dystrophy gene homolog). [X13369]	A_87_P008960	TGGTTCTTACCTAAATGACAGTATTTCACCTAATGAGAGCATCGATGATGAACACTTGTT	up	1.44298	0.252691	up	1.7879	0.0973145
RCJMB04_8j20	Gallus gallus mRNA for hypothetical protein, clone 8j20. [AJ719940]	A_87_P036752	AGTGTGTCAGCCTGATGGTGACACATACACACACACCAAATTTGGATGAGGAATGAGGAT	up	1.44292	0.124685	down	1.08426	0.692526
PTCHD2	Gallus gallus finished cDNA, clone ChEST1034l16. [CR386085]	A_87_P016712	GTGGCTGTGCTCTTCACCATGCCAGCTGCTCTCGGAATATGGACCCTTTATGTGTCCCCA	up	1.44218	0.474445	down	1.02865	0.932274
LOC426944	Gallus gallus finished cDNA, clone ChEST702e5. [CR405938]	A_87_P013100	TGAGTCCTTTCCCTGGAACCAGCTGCTGCCAGCTTCAGTTGCTTATCTTAGATACATATT	up	1.44204	0.0966627	up	1.23372	0.393664
JAK	Gallus gallus Janus tyrosine kinase (JAK) mRNA, complete cds. [AF034576]	A_87_P037984	CCCCCATTTCCCCCTCTTTTGTAACCGGGTTTGACCAATTTCAAGTAAATGATGGTGGAA	up	1.44199	0.00772835	up	1.28306	0.152838
BF381429	GAR69_X2_5A DDChick1 Gallus gallus cDNA 3' similar to glutamine phosphoribosylpyrophosphate amidotransferase, mRNA sequence [BF381429]	A_87_P034997	TATGGTTACGGCTTGGATAACGCCTGTGCTGCAAAAGCTGTCTTGGCGAATTATAATATG	up	1.44194	0.729834	down	1.11062	0.9458
RCJMB04_3e19	Gallus gallus mRNA for hypothetical protein, clone 3e19. [AJ719549]	A_87_P037016	ACACCGTGGAGCAGGAGTTCTGTCTGGAGATAGCGAAGCAACGATTGAGATCGACGACGG	up	1.44188	0.00447984	up	1.29886	0.0518535
CD219016	pgr1n.pk008.l3 Normalized chicken reproductive tract cDNA library (pgr1n) Gallus gallus cDNA clone pgr1n.pk008.l3 5' similar to no significant hits (pLog(P) > 4), mRNA sequence [CD219016]	A_87_P021341	AACAGCAGCTGTTTTCCAATGGGTGAATAATACTTGCTAGCAGTTAAGGAAACTTGTTGG	up	1.44146	0.0054384	up	1.41728	0.0204852
RCJMB04_4k12	Gallus gallus mRNA for hypothetical protein, clone 4k12. [AJ719622]	A_87_P036966	CGCTGTGGAGCCCAGGAGGTTTGAAATCGGCTGTAGAAGAAAGTACTGTAGCATTATTAT	up	1.44127	0.023421	up	1.16219	0.147978
LOC417629	Gallus gallus finished cDNA, clone ChEST292c24. [BX929961]	A_87_P024506	ACTGATGCAAGAATACAGATCCTGAAGGAGCTTGCTATTGTGGAACTTGACAAACAGGGC	up	1.44067	0.161756	up	1.09683	0.709372
IDI1	Gallus gallus finished cDNA, clone ChEST106a21. [BX950735]	A_87_P021486	AATGTAAATAGCTGCAGTGAGAGATGCTGAAGGCTGGACGTGATGTCTGTGTGGTTACTT	up	1.44057	0.00377595	up	1.40216	0.0384022
PLCH1	Gallus gallus finished cDNA, clone ChEST992k14. [CR524217]	A_87_P011049	AAATAACTTGCCTAGCTCTTTTTGTTCTTCACCTTTCTCTTTGCTGAATGCAAATCCCCA	up	1.44007	0.819867	up	1.6063	0.770529
CMYA5	Gallus gallus finished cDNA, clone ChEST514j10. [BX933226]	A_87_P023140	AGGGGGGCAAATGTACTTTCCCTTTGAAAATAATGACAGTGGTTTCTGTCTTTTTAAATT	up	1.44004	0.0375842	up	1.38097	0.175803
BM425763	pgf2c.pk001.m13 Primary Chicken Abdominal Fat Library (pgf2c) Gallus gallus cDNA clone pgf2c.pk001.m13 5' similar to gi [BM425763]	A_87_P034890	TTGGACCACCTGGAGGAGAAGATCCCAGCCCTTCAGTACCCTGTTGATAAGCTTGCCTCC	up	1.43993	0.496706	up	1.1407	0.636498
ARHGAP15	Gallus gallus mRNA for hypothetical protein, clone 1j23. [AJ719361]	A_87_P037142	TCTCCTACCCTGTTTTGTAAAAGTATTCTGCTGATAAAATGTAGACTTATGTTTGACAGC	up	1.43953	0.00839825	up	1.20552	0.0794221
SOCS3	Gallus gallus sdownpressors of cytokine signaling 3 mRNA, complete cds. [AF424806]	A_87_P037625	ATTCCATCTTCACCTCCAGCCTTGAGGGCTGAGCAAAACCATGCTTGAAATTCAACCAAA	up	1.43948	0.0108274	up	1.77746	0.00525357
BX931694	Gallus gallus finished cDNA, clone ChEST743k4. [BX931694]	A_87_P023819	TGGCGGGATTTCCTACTGCCTGGGCATGGTCTTCTTCAAAAGCGATGGCCGCATCCCCTT	up	1.43948	0.386794	up	1.32581	0.574447
KPNA4	Gallus gallus mRNA for hypothetical protein, clone 6g17. [AJ719777]	A_87_P036865	ATGAGAAGACAAAGGAATGAAGTTCTCGTGGAGTTGAGAAAGAACAAAAGAGACGAACAC	up	1.43947	0.525351	up	1.48479	0.551964
HDGFRP3	Gallus gallus finished cDNA, clone ChEST69e7. [CR382435]	A_87_P017357	AACTGAAATTCTCCAAGTCAAAACACCCAAAATTCAACATCCCCAAAATAAAGTGTTTGC	up	1.43942	0.00472658	up	1.34197	0.018412
AXIN1	Gallus gallus axin-related protein transcript variant 2 (AXIN1) mRNA, complete cds. [AY640375]	A_87_P035095	TACAGGTATTACTTTAAGAAAGTGAGTGATGAGTTCGACTGCGGTGTGGTCTTTGAGGAG	up	1.43918	0.172082	up	1.4219	0.0315823
LOC417998	Gallus gallus finished cDNA, clone ChEST178d9. [CR387914]	A_87_P015484	GTGCTACAGGGCTGTACCTACAACATGGCGAGAGCAGTTTTCTGGGCTTGTCCTCACTGC	up	1.43917	0.0453933	up	1.29026	0.203628
RCJMB04_22o22	Gallus gallus finished cDNA, clone ChEST831h6. [CR389121]	A_87_P015020	TCTGATGCCCACACAAATAATTCCTGGAAGAGCACTCTATGATGTTGGTGATATTGTTCA	up	1.43916	0.513516	up	1.54669	0.474389
TMOD4	Gallus gallus Sk-tropomodulin (Sk-Tmod) mRNA, complete cds. [AF165215]	A_87_P037840	GTGCTGGCATGATGAGCGTCATCAAGGCCATGTACCAGAACAGCACCCTGAGTGAGCTCA	up	1.43912	0.587109	up	1.60236	0.391369
RCJMB04_15g18	Gallus gallus mRNA for hypothetical protein, clone 15g18. [AJ851657]	A_87_P035629	AGGGCGGATTCTTGATATCCAGACTAATAAAGCTAACAGTGGATGGGTTCGCCAACGATA	up	1.43902	0.0280429	up	1.29257	0.108099
BX930391	Gallus gallus finished cDNA, clone ChEST637o15. [BX930391]	A_87_P024320	ATTGAGATGCTGCTTCACCAGGAGGGGCTGAAGGAGGCTGGAAGGATCTTCTATTTCTCA	up	1.43862	0.492671	up	1.18138	0.742629
IRS-1	Gallus gallus insulin receptor substrate 1 (IRS-1), mRNA [NM_001031570]	A_87_P009216	TGAGAGCAGCTCCACCCGCCGCTCAAGTGAGGATTTAAGCGCCTATGCCAGCACTAGTTT	up	1.43799	0.0196586	up	1.32365	0.173671
FAT	Gallus gallus clone 2 fat1-like mRNA, partial cds. [AY355446]	A_87_P035195	TGGTTGACTGTCTATGCAACAGACCAAGGTGTTGTGCCATTATCATCTTTCATTGAAATC	up	1.4379	0.154062	up	1.27742	0.292639
AM063183	AM063183 Chicken immune 2 - CSEQRBN29 Gallus gallus cDNA clone BET603945462_R1_M13F, mRNA sequence [AM063183]	A_87_P035419	GTGTTTCATTCTCAAGCCGGTTTGCCCTCACAATTCCGCGTTGTTGATGAGGAGGTTCAG	up	1.43705	0.644524	up	1.03005	0.973761
IGF2	Gallus gallus insulin-like growth factor 2 (IGF2) mRNA, partial cds. [AY267181]	A_87_P035220	ATCTCACGCCAAGTACTCCAAGTACAACGTGTGGCAGAAGAAGAGCTCGCAGCGGCTGCA	up	1.43619	0.549614	up	1.41775	0.576202
RCJMB04_8b8	Gallus gallus mRNA for hypothetical protein, clone 8b8. [AJ719906]	A_87_P036776	ATCAAAGCCTTCAGTCCATGATGAAAACGGAAGGACCAACTTACGGAGCTCTGCCACCGG	up	1.43582	0.243307	up	1.24848	0.47572
RCJMB04_23d16	Gallus gallus mRNA for hypothetical protein, clone 23d16. [AJ720676]	A_87_P036253	TTTTTTCCCATGATCAGTAAATGATGTGAACACAAGAAACCTTTCAGACTTTCCAGGTGT	up	1.43572	0.103922	up	1.01578	0.965504
FGFR3	Chicken tyrosine kinase (cek2) mRNA, complete cds. [M35195]	A_87_P009347	ACCACTGTACAGAAAGTCTCCAAATTTCCACTCAAGAGACAGGTGTCGTTGGAGTCCAAC	up	1.4357	0.219102	up	1.25254	0.377267
NP411387	GB|AF438198.1|AAL32453.1 CALII [Gallus gallus] [NP411387]	A_87_P008421	ACAGCTCCTGCAGAAGTTCAAGGAGCTCTTCCACTCCATGGGCCTGACTGAGGACATGCT	up	1.43559	0.632008	up	1.12029	0.891298
NCALD	Gallus gallus neurocalcin mRNA, complete cds. [U91630]	A_87_P008997	TAAGAATGCTGAATTGCTCTTAACGATTTGTCCAGAGCACAAGCAGTACTGTTTTAAACA	up	1.43555	0.227414	up	1.2706	0.382474
CR391433	Gallus gallus finished cDNA, clone ChEST336g24. [CR391433]	A_87_P013462	CTGCAGACTCTCAGACTGATGCTGATGGGACTCCTGGTGTTGTCGATAGTACGATATCAT	up	1.43525	0.597885	up	1.37578	0.693142
BM426314	pgf2n.pk002.f10 Normalized Chicken Abdominal Fat Library (pgf2n) Gallus gallus cDNA clone pgf2n.pk002.f10 5' similar to dbj [BM426314]	A_87_P034888	ACCGACGATGGCACCAACGTTATCACGGATGGCCCCGACGTCATCGCCGACGTCACCAAT	up	1.43518	0.209371	up	1.30059	0.454273
AJ851481	Gallus gallus mRNA for hypothetical protein, clone 3m23. [AJ851481]	A_87_P035744	ATGGGTGCATTGCCAAAGATTTAAAATGCAAGTAGGTGCTGGAGACTAAGTAAGTGCTGT	up	1.43497	0.0320788	up	1.24519	0.259571
IGSF4D	Gallus gallus finished cDNA, clone ChEST114o11. [BX950409]	A_87_P021643	GTGCTTCATTTGAAACAAATTTGTCCTGCCCTTCTACTGCTTTTTTGGGATCACAAAGAT	up	1.43378	0.410667	up	1.10097	0.864753
TNMD	Gallus gallus finished cDNA, clone ChEST298h12. [BX935041]	A_87_P022296	TGAAGAGCTCCAAAATTTTTAACATTTGTAGAAACGTGACCATCTACTGGATCCACCCAA	up	1.43363	0.0469317	up	1.28783	0.148471
CR523759	Gallus gallus finished cDNA, clone ChEST522i9. [CR523759]	A_87_P011387	TTGCTTGAACATAGCATTCTTTCTGATGCCAAAGGAATAGCTTAAATAGGAAGTAGCTCT	up	1.43362	0.129091	up	1.39176	0.23143
CR352499	Gallus gallus finished cDNA, clone ChEST175l4. [CR352499]	A_87_P018550	GAGATAAGTATGAGCTACATGCTGCCACTGATACTACCCCAAGTGTTGTTGTCCACGTAT	up	1.43326	0.00282936	up	1.09434	0.442357
RCJMB04_18k24	Gallus gallus mRNA for hypothetical protein, clone 18k24. [AJ720482]	A_87_P036380	TTCAAACAACTGCTTTTAAAATGATAGAAGTTGGCAGTTGGTACTGTTTTGTATGCTAGG	up	1.43321	0.214603	up	1.22456	0.463051
CN235537	RJB106C12.ab1 RJtestis Gallus gallus cDNA 5', mRNA sequence [CN235537]	A_87_P020495	AGCAGCAGCCAAAACCAGACGCCCGCGTCCTGCCCCAGATACGCATGGGACAAACAGGAT	up	1.43314	0.00699989	up	1.36612	0.0205555
UCKL1	Gallus gallus partial mRNA for putative zinc finger transcription factor (ZFP gene), splice variant 1 (truncated), clone chZFP21. [X78334]	A_87_P008826	GGGCTGAGATCGGTGTGATGCGGTGAGCTCAGCATCTCCTTATCCCCTTCCCGCTGGGAT	up	1.43287	0.533477	up	1.25386	0.729881
CD217633	pgr1n.pk004.e6 Normalized chicken reproductive tract cDNA library (pgr1n) Gallus gallus cDNA clone pgr1n.pk004.e6 5' similar to dbj [CD217633]	A_87_P021370	ATCATGGCAGCGCTTCAGACCAAAGGATATGAGGCAGTGTGGTGGGACAAGCGCAGGGAT	up	1.43243	0.408165	up	1.19932	0.621335
TPI1	Chicken triosephosphate isomerase (TIM, D-glyceraldehyde 3-phosphate ketol-isomerase) mRNA, complete cds. [M11314]	A_87_P009411	CCATCTCAGCAGAGTCTCCTTTCTGAACTGGCAAAATCCTTGGTTATCTGTTGAGCTGTT	up	1.43223	0.0324055	up	1.24272	0.342728
IL28RA	Gallus gallus finished cDNA, clone ChEST328p11. [BX935722]	A_87_P021978	CCTGAGGAAGGATGTGTTAAGATATCAGATGAGGTTACAGAATATCAAAGAATTCCATCA	up	1.43172	0.380406	up	1.05463	0.912035
RUNX1T1	Gallus gallus MTG8/ETOb mRNA, complete cds. [AF263839]	A_87_P037733	ATCTTGAGGTGGTAGAAAATACAGAAGGCCAGTAACGGGTCATAATGACTTATTGTGGAT	up	1.43096	0.0337491	down	1.05034	0.810305
LOC395990	Gallus gallus serine protease mRNA, partial cds. [U72352]	A_87_P009029	TGAACACCATGAAGGTGACGTCAGGCATCTCCTTTGCCATCCCCTCAGACCGACTGCGAA	up	1.43067	0.0826698	up	1.2103	0.305225
BRAF	Gallus gallus serine/threonine kinase (RMIL) mRNA, partial cds; alternatively spliced. [AF449458]	A_87_P037617	GATACGGTGGGTTTCCAGTACACTGAAAAGAAATGTGAAAGCGTGTGCCTGTTTGCTCAT	up	1.43056	0.59453	up	1.4667	0.6472
POLR2F	Gallus gallus mRNA for RNA polymerase common subunit RPB6 (RPB6 gene). [AJ251211]	A_87_P037484	TCTCCAGCAGATGTTTCTATTTTTGTTTATATTTTTGTTTATATTTGTATAAATAAATTA	up	1.42967	0.0172579	up	1.21662	0.152375
MYOZ1	Gallus gallus finished cDNA, clone ChEST163n14. [BX935870]	A_87_P021910	TCCTCTGAGTACCATACTGACATCAATGTGCCGAGAAGTGGTGAAACAGAAGAGCTGTAA	up	1.42871	0.451929	up	1.59201	0.373786
RNF126	Gallus gallus mRNA for hypothetical protein, clone 16f4. [AJ720373]	A_87_P036454	GCAAATAGTTGTCACTGAGCAAATGAACTCTTGAAACAGACCCTATTATCCTTTCCTTCC	up	1.42852	0.0211353	up	1.46984	0.0158214
BX929951	Gallus gallus finished cDNA, clone ChEST900j21. [BX929951]	A_87_P024511	TGCCCGCAGCCCTGAGCTGCCTTGCCACAAGTGCCCTTGGATTCAGACCAAAGCCGACTT	up	1.42794	0.00856909	up	1.38846	0.0202044
CR387468	Gallus gallus finished cDNA, clone ChEST491i8. [CR387468]	A_87_P015797	AACTTCGAGACAGAGCTGGAGACAGTGGAACGCGAGTACAGGACCGGGCCCGTGATGGAG	up	1.42779	0.449601	up	2.1146	0.274102
LOC395818	Gallus gallus v-Jun transformation associated target protein JTAP-1 mRNA, complete cds. [U37691]	A_87_P009087	AACCTCGCCAGCTTCCCCAAGATGTGAGCTCTGGAGGTGCCAACGTCCGTCTGCAGGAGT	up	1.42775	0.0240541	up	1.27939	0.124315
NRBP1	Gallus gallus mRNA for hypothetical protein, clone 35j18. [AJ721116]	A_87_P035931	TCGGGGTGTTCTGTAGCCCCGTTCATGTGCATGGAATTTGTTCTGTTTGGATTGTACAAA	up	1.42766	0.105757	up	1.53925	0.0710811
WHSC1	Gallus gallus finished cDNA, clone ChEST899n11. [CR524202]	A_87_P011061	TTATGCTGCTCTGAACACGTTCTCGGGGTGGATTCTGTTGAAACTCAGAAGACTGAGAAA	up	1.42738	0.392118	up	1.33216	0.459026
CR353112	Gallus gallus finished cDNA, clone ChEST214f17. [CR353112]	A_87_P018155	CTGCTAGGCCCTGAGGGTTTTGAACTTATAGAGAAGCTCCTACAGAACAGATCTGTGATT	up	1.42721	0.556548	up	1.40695	0.604291
LOC395100	Gallus gallus cryptochrome-like protein mRNA, complete cds. [AY300013]	A_87_P035209	GATGACAGAGCAAACCTAGATCCCATTGGGGATTACCCTCTGGGAACTGAGGAATGACAG	up	1.42706	0.0326542	up	1.24463	0.233745
SFRS2	G.gallus PR264 mRNA. [X62446]	A_87_P008887	GAATCCAACTCCAGATCCAGGTCTAAGAGCCCTCCCAAGTCTCCGGAAGAGGAAGGAGCT	up	1.42702	0.0119868	up	1.29363	0.0433561
LOC415358	Gallus gallus finished cDNA, clone ChEST47l11. [BX933588]	A_87_P022950	AATGGGTCATCCAGCAGTTCAAGGAGAAAGTCACACCCAAGATAAGCAGTTTTCGACCTT	up	1.4269	0.099838	up	1.37637	0.0394622
DIAPH3	Gallus gallus finished cDNA, clone ChEST767i2. [CR406653]	A_87_P012634	GTTACATCTCCTGATGATCTGGATTTTAGGCTTCACATTAGAAATGAATTTATCCGCAGT	up	1.42688	0.493409	up	1.27758	0.677511
ASB12	Gallus gallus finished cDNA, clone ChEST47o3. [BX933547]	A_87_P022976	GTGAGCTACCTCCAACATCAGCCTTAGCGGGGACACACTATGGAAGACACCCAGAAATAT	up	1.4268	0.579408	down	1.05493	0.948874
INVS	Gallus gallus inversin mRNA, complete cds. [AF465207]	A_87_P037604	GCATGCGGTGACAGTTCTCATTTAACCCGTATGTTTAAACACGGTACGTCTGTTAGTGCT	up	1.42675	0.54952	up	1.66093	0.433425
AJ720509	Gallus gallus mRNA for hypothetical protein, clone 19e21. [AJ720509]	A_87_P036362	TAAAAGGCTGTCTCTATCGCCCCATTTCATGCACTGAGCTGGGAGTTCCAGTTCAAATTT	up	1.4267	0.560263	up	1.27661	0.747607
CLSTN1	Gallus gallus partial mRNA for calsyntenin-1 protein. [AJ289017]	A_87_P037471	GGATGACTCTACCCTCAGTTATTGATTTTAGCTGTTCCCTTTGTCTTTGTTTCTGCTCTA	up	1.42657	0.0188958	up	1.33066	0.100446
DCX	Gallus gallus 18C15 mRNA, complete cds. [L77700]	A_87_P009419	TTGTAATAACCATCCCAGGTCTGAGTATTCTTGTAATGCAATGCCATGCAGCAGAGAACC	up	1.42645	0.278081	up	1.04065	0.918257
BX932201	Gallus gallus finished cDNA, clone ChEST361k19. [BX932201]	A_87_P023600	GAAAATCCGGGATAAGACCTTGCCACCTGATCATTTTGCCCATCTTCAGTATGGATTGTT	up	1.4257	0.504539	up	1.40549	0.527378
GNPTAB	Gallus gallus finished cDNA, clone ChEST201i24. [BX950731]	A_87_P021487	ACAATCACAAGGATGCTCAGACAGTGAAAGCGGTGCTTAGGGACTTTTATGAATCAATGT	up	1.42568	0.0740839	up	1.2596	0.232823
RPL21	Gallus gallus finished cDNA, clone ChEST100m4. [BX932372]	A_87_P023528	CGGAGCTGCTGGAGCCAATTCCCTATGAATTCATGGCGTAATGCACGTTTGAACAATAAA	up	1.42553	0.318098	up	1.33178	0.460617
PTK2	Chicken focal adhesion molecule (FAK) mRNA, complete cds. [M86656]	A_87_P009283	ATCGTTTCTGCAAGTAAGAAAATTCAGCTTGGACCTGGCCTCCCTTATCCTCTACGCTTA	up	1.42551	0.733536	up	1.88679	0.524235
INHBA	Gallus gallus inhibin beta A subunit mRNA, complete cds. [U26946]	A_87_P009114	AGTGTGGCTGTTCATAGACACGTGTGTGCACAAGACCCTTCTCTTCATGTTGAGAAGAAA	up	1.42544	0.0068844	up	1.51537	0.0052277
CR353781	Gallus gallus finished cDNA, clone ChEST924a10. [CR353781]	A_87_P017727	TGTTCTGTGTAGCTACTGAAGTCCTTTCAGGTAACTGAAATAAAACTGGATTTGTGCGCG	up	1.42527	0.0277443	up	1.40483	0.114306
NEUROD4	G.gallus mRNA for NeuroM protein. [Y09597]	A_87_P008747	CCGCAGACCTTATTCCTGGAGAAGCACGAGGAGAAAACCCCGGGCTGCGAGTCGGCCATT	up	1.42517	0.694765	up	1.47652	0.567593
PTPN1	Gallus gallus protein tyrosine phosphatase (CPTP1) mRNA, partial cds. [U46662]	A_87_P009071	ACAAGCGAAACTTGCTTGTACTCTCTAAGTGTTGTAACCAAATACATCACTTGAATCGAT	up	1.42513	0.305551	down	1.01232	0.906409
CR387541	Gallus gallus finished cDNA, clone ChEST247n22. [CR387541]	A_87_P015748	AGGGCATCGGACATAAAGCGCTGCAGAGCGCTGTGCGTTCTTCCACTCGACTCAGAACAA	up	1.42459	0.0323393	up	1.04062	0.727852
CASQ2	Chicken mRNA fragment for calsequestrin homologue. [Y00789]	A_87_P008764	GACGATGATGATGACGATGATGATGATGATGACGACGATGATGACGACGATGACGATGAT	up	1.42426	0.176465	up	1.36013	0.257356
LHFPL5	Gallus gallus peripheral myelin protein 22 (PMP22a) mRNA, complete cds. [AY265159]	A_87_P035221	TGCGATTCGCTGTCTCTGGGGGGTTTGTACATCTTCTGAGGAAATGACTTCCGAATTAAA	up	1.424	0.00786621	up	1.363	0.0527339
DCX	Gallus gallus doublecortin mRNA, complete cds. [AF330009]	A_87_P037681	CTGTCTCCACGATTTCTTTGGGGACGATGATGTGTTTATTGCCTGTGGTCCCGAAAAATT	up	1.42391	0.696152	down	1.93603	0.498627
RCJMB04_5e8	Gallus gallus mRNA for hypothetical protein, clone 5e8. [AJ851533]	A_87_P035706	TGTTTCCTCCATGAACCTCTTTGACCTTGGAGGTCAATATCTACGAGTTGGTAAAGCTGT	up	1.4239	0.134474	up	1.44283	0.120577
BX931224	Gallus gallus finished cDNA, clone ChEST264p3. [BX931224]	A_87_P024012	CGAGAGGGACAACATCTCTGTGGTGGCTTACTGGGTGCCACAGGACCCCATCCCTTCGGA	up	1.42384	0.0573407	up	1.25929	0.197439
CR387534	Gallus gallus finished cDNA, clone ChEST501h3. [CR387534]	A_87_P015752	ACTGCCTGAAGAGAGAACCCCATCTGGGGGACAGATGAGCCCGGAGAGCCACTCAATAAA	up	1.42374	0.0835333	up	1.25998	0.214297
BX950236	Gallus gallus finished cDNA, clone ChEST696d15. [BX950236]	A_87_P021742	TTACGACAAACTTGAGGAGAATGCTCGCCTGTTCCACCCCAAGCTGATTATAGCAGGCAC	up	1.42352	0.496399	up	1.17776	0.779163
ST8SIA4	Gallus gallus polysialyltransferase mRNA, complete cds. [AF008194]	A_87_P038021	AGCCCTCACAGGATGCCATTAGAGTTTAAAACATTATATGTATTACATAACAGAGGAGCA	up	1.42297	0.102398	up	1.62801	0.105021
ROCK2	Gallus gallus Rho-associated coiled coil forming kinase 2 mRNA, partial cds. [AF347076]	A_87_P037673	TGCAGCAAAAGATACAAGAGTTACAGGACGAGAGAGATTCTTTGGCAGCACAGCTAGAAA	up	1.42227	0.013409	up	1.17965	0.543488
RGS7	Gallus gallus finished cDNA, clone ChEST132o4. [CR386262]	A_87_P016600	TTTTTACATCCCATATTGTACTGTTTTCTCTGTTATGAAGCACCTTAAACTGCAAAGTGC	up	1.42225	0.493509	up	2.09803	0.236985
SLC16A6	Gallus gallus finished cDNA, clone ChEST326d13. [BX935693]	A_87_P021995	AGCAGAGCCGAAAAGTGAAGAACCAAAGGACCATGTACAGATAACTGTTGAAAATAACAG	up	1.42145	0.0783857	up	1.08769	0.627622
FZR1	Gallus gallus CDH1-C mRNA, complete cds. [AF421548]	A_87_P037627	GCTGCTAAGGTCGCCCCCGAAACCCTCCGGATACATATCCAAGATCCCTTTCAAGGTGCT	up	1.42093	0.147303	up	1.28384	0.424222
PAPOLA	Gallus gallus poly(A) polymerase II mRNA, partial cds. [AF061758]	A_87_P037956	ATTCCTGTTATCAAGAATTCAATAAAATTGAGATTGAACCGGTAAAAACAACCTCAGGGG	up	1.42087	0.042486	up	1.43254	0.0744696
AJ721074	Gallus gallus mRNA for hypothetical protein, clone 34d21. [AJ721074]	A_87_P035961	CACCATTTCTCCTGGAAAAATAAACGGCAGTGTTGCAGGAGAAGTGCAAAACCCAGGCCA	up	1.4204	0.0970886	up	1.6139	0.0611347
PKM2	chicken muscle pyruvate kinase (pk) mrna, complete sequence. [J00903]	A_87_P009551	CCTTCTATGGTGTCTGTCTGTGTTGTCGCCTTTCCTGAGAGCGTTCCTTTTGTCTGGGCG	up	1.42031	0.00447984	up	1.2366	0.0610149
BX258200	BX258200 AGENAE Gallus gallus multi-tissues normalized library (gcag) Gallus gallus cDNA clone gcag0006c.d.10 3prim, mRNA sequence [BX258200]	A_87_P025184	TTGCATGGCTGAGTTCATCTTGTTACTTATTGAACCCTGGCAGATTAGATTTTAGTTCTG	up	1.42014	0.0309272	up	1.44164	0.0529364
CR390599	Gallus gallus finished cDNA, clone ChEST43h2. [CR390599]	A_87_P014043	ACGTACGCGTGAGTCAGCGTGGACTAAGCCAGACGGGGTGAAGGTCATCCAGCAGTCGGA	up	1.42009	0.0122258	up	1.24021	0.219018
LOC420433	Gallus gallus finished cDNA, clone ChEST63n10. [BX931006]	A_87_P024118	GGTTAAGGAGGTTATAGAGGTATCCACCTCCATACTGTTGTTTTCCATCTGGAAGGTTAC	up	1.41991	0.00447984	up	1.26721	0.0124807
NR1I3	Gallus gallus xenobiotic receptor (CXR) mRNA, complete cds. [AF276753]	A_87_P037730	AGGGTGTAAAGGGTTCTTCAGGCGCTCCATCCTTAAGGGTGTGCACTTCACCTGCCCCTT	up	1.41926	0.649447	down	1.03124	0.973845
LOC416463	Gallus gallus finished cDNA, clone ChEST382e18. [BX934606]	A_87_P022516	GCTCTGTGAAAATCACCTCAATTGAAATACAAGCCTCCGTAACAAATAAACAGCAATTGC	up	1.41874	0.517659	up	1.47286	0.530284
PALD	Gallus gallus mRNA for hypothetical protein, clone 11g7. [AJ720140]	A_87_P036616	GGAAATATTTCATGGTCAGAGATGTGTACAGCAAGTTGGATGTCTTGAACACTACTGCCA	up	1.41823	0.23946	up	1.67111	0.0944039
GARNL1	Gallus gallus finished cDNA, clone ChEST209a9. [CR391194]	A_87_P013650	ACACTCCATTCTTACTAATACTGGGGGAAGTCAAGCCTATGAGGATTTTGTAGCTGGCCT	up	1.41814	0.052427	up	1.41486	0.119891
IFNB	Gallus gallus interferon b mRNA, complete cds. [AY831397]	A_87_P035042	CACACTCATACAATGGATGAAAAGTCGAGCTCCTCTCACAGCCTCATCCAAACGTCTCAA	up	1.41813	0.406348	up	1.41108	0.36801
PAX7	Gallus gallus mRNA for PAX7 protein, complete cds. [D87838]	A_87_P009764	AACCCGAGTTCATGCCTCCTCTACTGGCCATGTGTCTGCCCATGCTAAAGACCTTCCATT	up	1.41748	0.0465451	up	1.3453	0.108424
FZD7	Gallus gallus Frizzled-7 (cFz-7) mRNA, complete cds. [AF224317]	A_87_P037766	GTTGAGGTTCACCCTTGGATGTGAGGAGCTCGCAGAAATAAACATTCCTTTTGTGAGGAA	up	1.41712	0.0985079	up	1.32303	0.173283
PER2	Gallus gallus PERIOD2 (PER2) mRNA, complete cds. [AF246956]	A_87_P037746	TGAAATGATTGAAGACAGTGGGGAGAACAATTTGGTTCCTCTGAGTCAAGTCAATGAAGA	up	1.41688	0.209536	up	1.7083	0.109594
CD8B	G.gallus mRNA for CD8 beta-chain antigen. [Z26484]	A_87_P008699	AGCACAGAAGCTTGCTCTGCACTGGGACTGGGGTACCAAATGGGTGAATCTGGGCTGGAA	up	1.41681	0.55153	up	1.35771	0.594366
AJ455556	AJ455556 riken1 Gallus gallus cDNA clone 5n22r1, mRNA sequence [AJ455556]	A_87_P037275	TGTGGGCACTGGGCTGGCGACTGTTACTTTGACCTGCCTTCTTATAGTATACTGGCGGCG	up	1.41668	0.556545	down	1.00074	0.998658
CN228858	RJB061G05.ab1 RJtestis Gallus gallus cDNA 5', mRNA sequence [CN228858]	A_87_P020671	GCAGCCCTGCAACGCATATCGCTTCTGCTCTGCAAAGATAAATAATGACAAAGCTCATCT	up	1.41645	0.596943	down	1.11118	0.876897
BX933712	Gallus gallus finished cDNA, clone ChEST423d20. [BX933712]	A_87_P022906	AAATGGAGCAGCTTGGAATAACTTGTTACTTTTGGAAGTTTTGACTGCAAATGTCAGGAT	up	1.41619	0.481065	up	2.04014	0.252545
RREB1	Gallus gallus Ras-responsive element binding protein 1 mRNA, partial cds. [AF221559]	A_87_P037771	AGGAATCAAGAGCTGGCTTCTTCTGTGATCACTGATAATGCCTATAACTGGCAGCAGTGT	up	1.41601	0.13135	up	1.27535	0.222113
LOC395762	Gallus gallus KS5 protein mRNA, complete cds. [AF043493]	A_87_P037967	GGACAGCAGTTAATGCAACTCGACAGTGATAAGTTAAAGGCTTTGGGAGTTTCCAGTCCA	up	1.41593	0.130007	up	1.04762	0.890154
cor4	Gallus gallus olfactory receptor 4 (cor4), mRNA [NM_001031543]	A_87_P009224	ATTCCCTCAACACGGATAAGGTGGTCTCTGTCTTCTACACGGTGGTGATTCCGATGCTGA	up	1.41592	0.665408	up	2.21907	0.232165
UBE2Q2	Gallus gallus finished cDNA, clone ChEST553k23. [BX931952]	A_87_P023722	TCCAAAAGAAGACGGTTAATACTGAGGACTGGTTGTATACCTGGACCAATGCCAACAAAA	up	1.41587	0.0142079	up	1.16485	0.200957
CN227294	RJB015H05.ab1 RJtestis Gallus gallus cDNA 5', mRNA sequence [CN227294]	A_87_P020724	CATCACTGTTAGCTTCCCAGTAGTTCTGTTGACACAGTTGCTTTTGTTTTTTACATGGAT	up	1.41568	0.00469912	up	1.27632	0.0871915
ECT2	Gallus gallus finished cDNA, clone ChEST261n20. [CR391299]	A_87_P013562	AAGAGTGGTTCTGGGGAAGCATTCAAATGGATGCCAGAGCTGGAGAGTCCATGTATTTAT	up	1.41564	0.283268	up	1.62286	0.246597
LOC421210	Gallus gallus partial mRNA for hypothetical protein, clone 18n22. [AJ720486]	A_87_P036377	AAGGAAAACCAAAGTTTGCTGAAAACAGTGGAAGAACTACGAAGTACAATGGATGATTCT	up	1.41541	0.026424	up	1.056	0.574951
SEMA3F	Gallus gallus secreted chemorepellent semaphorin 3F (SEMA3F) mRNA, partial cds. [AF495525]	A_87_P037587	AGACTCAGGACACCAAGAATCCTGTTATCTACGCCGTCTTCTCCGCATCGGGGTCGGTGT	up	1.41498	0.513353	up	1.80188	0.326972
MYOG	Gallus gallus mRNA for myogenin, complete cds. [D90157]	A_87_P009757	TGAGTGGAGCACCCAGCTGGAGTTTGGCACCAACCCCGCAGATCACCTCCTGAGCGATGA	up	1.41496	0.212399	up	1.51576	0.163962
RCJMB04_23o22	Gallus gallus mRNA for hypothetical protein, clone 23o22. [AJ720712]	A_87_P036229	CCTTGCTTGTAAAGGATCTTTTTAAAATAATTTGTAAGATAGTAAGAGACCTTCCCTGGC	up	1.41475	0.218195	up	1.45375	0.233528
CR353972	Gallus gallus finished cDNA, clone ChEST97i23. [CR353972]	A_87_P017619	ATGTCAGAAGACCCCACTCACCCCTCAATGGCTCTGAACACACGTTTTGCGGAGGTGGAG	up	1.41471	0.104699	up	1.1068	0.657067
RCJMB04_23j5	Gallus gallus mRNA for hypothetical protein, clone 23j5. [AJ720694]	A_87_P036241	AAGGGCTTTTTGGCAAGGTTCCTGGCAAGGTTCTCTTAGGAGCGCCTCACTGAGGCTTTA	up	1.41449	0.0373723	up	1.27306	0.0982135
BRD2	Gallus gallus bromodomain containing 2 (BRD2), mRNA [NM_001030674]	A_87_P009255	AAGATCTTCCTGCAGAAGGTGGCCCAAATGCCACCAGAAGAGCAGGAGATCGTGGTCCCA	up	1.41376	0.0997605	up	1.2623	0.237784
ELMOD2	Gallus gallus finished cDNA, clone ChEST357a2. [BX932331]	A_87_P023542	GCAGCACATCAGGTTCTGCATCAAGAAGGGAATTATGCATTTGGTTTTGCAAGTTTCACT	up	1.41371	0.0585977	up	1.22549	0.341428
TSPAN2	Gallus gallus finished cDNA, clone ChEST216n19. [CR353115]	A_87_P018153	CCGTAACACGAGAGAAATGATCTAAAGCTGTCACTGCACAACTGTGTCCAGAAGCTTTAC	up	1.4137	0.198748	up	1.39706	0.258236
TC187660	GGHMG2A HMG2a {Gallus gallus;} , partial (29%) [TC187660]	A_87_P008189	GTGTCCGGGATTTATCAGTTAAGTGCGGTAGTTTTAAACTGGAACTTGTAGACCTCTCTT	up	1.41357	0.544383	up	1.48649	0.513143
RCJMB04_33n14	Gallus gallus finished cDNA, clone ChEST866o24. [CR354353]	A_87_P017375	GTCAAAGCGATCGCTCGTCTCATCGAGTTCTACAAGCACGAGAGCTGTGGGCAGTGCACC	up	1.41355	0.0302362	up	1.15819	0.168455
RCJMB04_1b15	Gallus gallus mRNA for hypothetical protein, clone 1b15. [AJ719282]	A_87_P037198	AACTGAAAGCAAAGCTTTCTGGAGTTGAAAGATGAATGTCAAGAGCCCAAGCAGGAGGTA	up	1.41348	0.319912	up	1.29236	0.468873
LOC414337	Gallus gallus cathelicidin mRNA, complete cds. [AY534900]	A_87_P035144	GCCCGAACGTCCAGCTCAGCTCCCTGCACAACCTCAACTTCACCATCATGGAGACGCGGT	up	1.41342	0.223181	up	1.412	0.197056
CO767816	spleen_EST03542 Spleen cDNA Library Gallus gallus cDNA 3', mRNA sequence [CO767816]	A_87_P019541	AAGGCCTGCTTTTACCTCAGTTGGATGGGTTTCTCTGAATACCTTGCTGGGATTTCTCAT	up	1.41304	0.668243	up	2.21325	0.236985
SGCD	Gallus gallus finished cDNA, clone ChEST1024e3. [CR405962]	A_87_P013084	ACAGCCAAAAATTTGAGGTGAAAACCCTCTCTGGAAAATTGCTGTTTTCTGCGGATGACA	up	1.41263	0.414079	up	1.41517	0.443444
CR387459	Gallus gallus finished cDNA, clone ChEST488p12. [CR387459]	A_87_P015804	AGCAGAAAGATAACACCTTTGTCTTCAAGATGGAGCACCCCATCCCCTCGTACCTGATTG	up	1.41257	0.264859	up	1.32938	0.362622
BX934220	Gallus gallus finished cDNA, clone ChEST446k24. [BX934220]	A_87_P022684	TGTGATCTGGGTGGATGCGCATGCTGATATTAACACTCCTCTTACAACTCAGTCTGGAAA	up	1.41239	0.000994989	up	1.12042	0.0628969
TPK1	Gallus gallus finished cDNA, clone ChEST568k19. [BX950550]	A_87_P021585	CTGCAAAACTTCACTGAATTGAGGCAGTAAAACTGATAACAGGGGAATAAGTACGCACCG	up	1.41227	0.0709816	up	1.4384	0.117013
SNCAIP	Gallus gallus finished cDNA, clone ChEST379m18. [BX930851]	A_87_P024165	CATAAAACTGAGAAGACTATGCCGAACTGCCATCTAAGGACTTTTCACCTGCAGACAACA	up	1.41221	0.533711	up	1.27728	0.680953
LAMP2	Gallus gallus lysosome-associated membrane glycoprotein LAMP-2b (LAMP-2) mRNA, complete cds. [U10547]	A_87_P009152	AGAGACGTGACTGACTACAGATGACACTGAGAGACCTTCCTTCCGTTGTTTAGTCCTTTT	up	1.41174	0.768706	up	1.65173	0.680413
GTL3	Gallus gallus finished cDNA, clone ChEST54k1. [CR386276]	A_87_P016589	TGAGTTCAAGCTGTACCTCCCTGTCCAGAACAAGGCCAAGCAATAACACTATACTGAGAA	up	1.41135	0.0235724	up	1.18089	0.219146
CR354310	Gallus gallus finished cDNA, clone ChEST77d11. [CR354310]	A_87_P017404	TTGCAGCACGATCTCCAGTTTTTAATGCAATGTTTGAACATGAAATGGAAGAAAGCAAAA	up	1.41112	0.0170247	up	1.05433	0.878568
BX932566	Gallus gallus finished cDNA, clone ChEST635a2. [BX932566]	A_87_P023449	CTGCGCCCCACATAACGAGCTTCCTGGATTGGATATGCAATTGCATACCACTTACTTAAA	up	1.411	0.191981	up	1.24848	0.385758
SFXN2	Gallus gallus finished cDNA, clone ChEST982j6. [BX929543]	A_87_P024684	TCAGGTTCTGGTTTTATTCACTTTGCGACTGTCACAATCCCAAAGACCCAAATAGATAAT	up	1.4109	0.00190374	up	1.29096	0.0246241
SPAG9	Gallus gallus finished cDNA, clone ChEST440f2. [CR390464]	A_87_P014134	TTTTTTAGCAGGCTCTTCAGTTCATCTAGCAATACAGCTAAGAAACCAGAACCTCCTGTC	up	1.41065	0.356855	up	1.22024	0.642821
CR352481	Gallus gallus finished cDNA, clone ChEST177e20. [CR352481]	A_87_P018559	AAATCGAAGAGATTTGCTGAATCCATCGTTTAAAGGCTTACCAGCTGACTTCCACGCACC	up	1.4105	0.55796	up	1.28938	0.710568
CRYBA1	Chicken beta-A3/A1-crystallin mRNA, complete cds. [M15658]	A_87_P009400	ACATCGAGCGCCTGATGTCCTTCCGCCCCGTCTGCTCTGCTAATCACAAGGAATCCAAGA	up	1.41038	0.0709816	up	1.31199	0.146393
PADI3	Gallus gallus mRNA for peptidylarginine deiminase, complete cds. [AB011020]	A_87_P038206	CCCAACTCCCCTTGGAAATAAATGAGGGCTGTGCCTGCTTCCAGCCTCCTGCTGAGGTTA	up	1.41035	0.405602	up	1.29377	0.493396
LOC395944	Gallus gallus mRNA for voltage-gated sodium channel SNS, partial sequence. [AJ001491]	A_87_P037536	AGAGCTTCTGGGAGGGTGTATATACTCTTCTTCATGCTGGTCATCTTTCTGGGCTCATTT	up	1.41021	0.555167	up	1.27901	0.727852
CR388668	Gallus gallus finished cDNA, clone ChEST851k13. [CR388668]	A_87_P015318	CCAGCTCAGCTGGGCTTGGTGTGTAATTTATAGGGACGGGGGTCCCGATGTATTTATTAA	up	1.41003	0.00477271	up	1.28399	0.0384022
CN221915	WLA036A03.ab1 WLbrain Gallus gallus cDNA 5', mRNA sequence [CN221915]	A_87_P020807	TACCCACAGCAGAACCTGTACACCCAGGGAGCTTATTATACCCAGCCAGTGTACGCGGCA	up	1.41	0.112766	up	1.29367	0.391648
RXRG	G.gallus mRNA for homologue of hRXR-gamma. [X58997]	A_87_P008905	GGGCTGCAAGGGCTTCTTTAAGAGGACCATCCGGAAAGACCTGATCTACACCTGCCGTGA	up	1.40995	0.0119035	up	1.5068	0.0288649
COL1A2	Messenger fragment for chicken pro-alpha-2 (I) collagen. [V00390]	A_87_P008989	TGGCGCTGACCAAGAATTCGGTTTGCACATTGGCCCAGTCTGTTTCAAATGAATGAACTA	up	1.40954	0.0306207	up	1.27502	0.141825
RCJMB04_1b13	Gallus gallus mRNA for hypothetical protein, clone 1b13. [AJ851376]	A_87_P035823	AGGGACCATACCGTGCCATGGTCTGATGCTAATCGGATTGTCCAATACACTGTACAAAAT	up	1.40922	0.224065	up	1.32644	0.332929
HABP4	Gallus gallus intracellular hyaluronan-binding protein p57 mRNA, complete cds. [AF227683]	A_87_P037761	CTACTTTCTGTTTCTTTCGTTGAACGTGTATTTTACACGTTTACAAGTTGCAGTTCTTGA	up	1.40887	0.064938	up	1.46985	0.0808421
RCJMB04_1g9	Gallus gallus mRNA for hypothetical protein, clone 1g9. [AJ719321]	A_87_P037171	CTGAGAAAGAAGATGCATAACCCTATGACAGTGACCCTTCATTGTGCATTTCATGCTGCA	up	1.40881	0.457555	up	2.08844	0.177816
WFDC1	Gallus gallus mRNA for PS20 protein. [AJ438290]	A_87_P037386	CTATCCATGCATCCCATGCTTGATGAGTGCAGGTTCTGCCACTTTGGTGCTCAATAAAAA	up	1.40796	0.00244714	up	1.28892	0.0310793
CHMP7	Gallus gallus mRNA for hypothetical protein, clone 19g23. [AJ720517]	A_87_P036357	ACTTCATGCCAAAGTCTCTCCAATGAATGATGTGGACATCGGAGTCTATCAGCTGATGCA	up	1.40754	0.0823246	up	1.58907	0.00673371
CR523059	Gallus gallus finished cDNA, clone ChEST563a19. [CR523059]	A_87_P011866	AAAGAAGCAGGTGAATATTTACCGCCTGGTCACAAAGGGTACAGTTGAGGAGGAGATCAT	up	1.40728	0.260089	up	1.3071	0.204644
POLR2E	Gallus gallus finished cDNA, clone ChEST505h16. [BX935423]	A_87_P022154	CAGAGCTCTCAGTTGTGAAAGAGTTCTGTGACGGCCGATCTTCCCATCCACCAACAGCTC	up	1.40689	0.0097879	up	1.23898	0.0710536
RCJMB04_28m17	Gallus gallus mRNA for hypothetical protein, clone 28m17. [AJ720882]	A_87_P036105	GAGCAAAACTTTTTGCATCTACTGATGCTGTTGGACGTAGAAGAACGCATCTTGCAGGGA	up	1.40636	0.0642107	up	1.05091	0.816674
MLLT4	Gallus gallus finished cDNA, clone ChEST127p23. [BX933921]	A_87_P022815	TGATGACAATTCCATTCAGTTATTTGGTCCAGGAATTCAGCCTCATCATTGTGATCTTAC	up	1.4056	0.260832	up	1.38	0.29748
CR406884	Gallus gallus finished cDNA, clone ChEST930i23. [CR406884]	A_87_P012464	CAGTACTTCTTCTGGCAGCTGGACATTGCTTTGATACTTCTTTTGAGCTTCGGAAAGTTG	up	1.40555	0.14577	up	1.45234	0.038351
RPS6KC1	Gallus gallus finished cDNA, clone ChEST773h13. [CR524437]	A_87_P010898	TTCTTAAACACGAGTCCCGAACAGAGCTTTGAAATTCCCGAGCCCAAAACATTCAGTTCG	up	1.40517	0.227154	up	1.13243	0.589248
AM063277	AM063277 Chicken immune 1 - CSEQRBL08 Gallus gallus cDNA clone HFU603551375_R1_M13F, mRNA sequence [AM063277]	A_87_P035415	TGAAGAACGTGACTGTGCCCCCATACAACCAAATCACAACACATGTGGACACAGTTACAA	up	1.40461	0.186	up	1.61366	0.124542
MAPK8IP3	Gallus gallus finished cDNA, clone ChEST543b18. [CR385193]	A_87_P017289	ATCTGTGAACATCCACTACAAGTCTCCAACCACAGCAGGGTTCAGCCAGCGCCGCAGTCA	up	1.40436	0.404841	up	1.25732	0.601329
RPS15	Chicken insulinoma (rig) mRNA, complete cds. [M33331]	A_87_P009351	AGCCTGAGATGATCGGTCACTACTTGGGGGAGTTCTCCATCACCTACAAGCCGGTGAAGC	up	1.40425	0.00940853	up	1.21787	0.157118
KCNIP1	Gallus gallus finished cDNA, clone ChEST253b16. [BX950408]	A_87_P021644	TCTCCTCCACAAGAGACGGCGGTGGACCTCTATTTCATTTTGGAAGCATGCAAATACTTT	up	1.40424	0.380256	up	1.43566	0.377026
RCJMB04_19j2	Gallus gallus mRNA for hypothetical protein, clone 19j2. [AJ720525]	A_87_P036352	TTTAAATGTATTTAAATATTTAAAAGGTTTGTCCCTTCCTCTAGGCTTTCACGCAGAGCG	up	1.40412	0.0927836	up	1.21843	0.317041
ADAMTS17	Gallus gallus finished cDNA, clone ChEST395j12. [CR390898]	A_87_P013861	GTGTGGTGGATTCCAAAGCATACCTATTGAGACTTGAAAACTAACTCTACAGACTGGATA	up	1.40406	0.0719988	up	1.16379	0.424222
RCJMB04_7l20	Gallus gallus mRNA for hypothetical protein, clone 7l20. [AJ719881]	A_87_P036794	CCTACTCTGGCGGGTAAGATCACTGGTATGTTATTGGAGATTGACAACTCTGAACTCCTT	up	1.40395	0.0235341	up	1.24557	0.232772
BX933578	Gallus gallus finished cDNA, clone ChEST47b18. [BX933578]	A_87_P022959	GACCTTCAAAGTCCTGGGAAGGAATCCGAGGATGGAGACTCAGAGAAGAGGGACCCGTTT	up	1.40369	0.249818	up	1.68704	0.0547122
TRDN	Gallus gallus finished cDNA, clone ChEST160j24. [BX935852]	A_87_P021920	TGTTTGCGCACGGGGATTTTTATCCAGGACATAAGGAAATGGTATCACCTCGTCTTCTTC	up	1.40369	0.611998	up	1.08352	0.917397
AKAP12	Gallus gallus finished cDNA, clone ChEST356f12. [BX932296]	A_87_P023553	CAGCAGCAGTTGCTACAGCAAGTGCCAAGGAGGGAAAAGCTGAAGATCAAGAAAGTAAAT	up	1.40356	0.033988	up	1.39025	0.0598514
RCJMB04_9a4	Gallus gallus mRNA for hypothetical protein, clone 9a4. [AJ851586]	A_87_P035672	AAATAGATATAGAAGACCACCAAAAAAGCCAAAAGAAACCACCAACCCCCACCCCCAGCA	up	1.4032	0.0169206	up	1.33403	0.123231
GCLM	Gallus gallus mRNA for hypothetical protein, clone 8g18. [AJ719931]	A_87_P036758	TTCTTGTAGGCTGTTGTATGAATTCTCATTGTCCTCCTCCTACTTTTTCACCTTATCGGA	up	1.40303	0.268285	up	1.44389	0.237784
COL6A3	Chicken alpha-3 collagen type VI mRNA, 3' end. [M24282]	A_87_P009386	AAGGGTTTTGCCGCATGACCTATCAATATGGTGCTAAACTGTTTGTGGACTGAGTGCTAC	up	1.40287	0.0219159	up	1.22095	0.133539
SYNE2	Gallus gallus finished cDNA, clone ChEST868h15. [CR389581]	A_87_P014732	CATCAATGAGGAGCTGGAACGAGAAGCAATAATTCTTGATAAGCTCCAGGAAGAACAGCC	up	1.40258	0.0181841	up	1.03676	0.771759
CR391307	Gallus gallus finished cDNA, clone ChEST264d12. [CR391307]	A_87_P013555	AATGCAGATTCAATCTCAGGAATCAGATTTAAAGTCACAGGAAGATGATCTTAATAGAGC	up	1.40252	0.266821	up	1.67397	0.136506
AJ448363	AJ448363 riken1 Gallus gallus cDNA clone 19j7r1, mRNA sequence [AJ448363]	A_87_P037322	TGCCAGCTTAACGGGGCTTCATTGCTGCAGCAGAAAACTGATGAAGAAGCTGATTTCAAA	up	1.40238	0.421201	up	1.14869	0.862804
NSUN4	Gallus gallus finished cDNA, clone ChEST684n13. [CR406559]	A_87_P012698	CTACATTCCCAAGGAAGTCAGGGAGACTGTGAGCGTTACATCGCATGACGGAAGGGACTG	up	1.40231	0.435151	up	1.1866	0.730237
USP47	Gallus gallus finished cDNA, clone ChEST712a13. [CR524399]	A_87_P010923	ACATCTGTGACGATGGCGCAGTAATATTTTATAGGGATAAAACGGAAGAATTAATGGAAT	up	1.40228	0.0309864	up	1.2986	0.0790934
CN231822	WLB045A12.ab1 WLtestis Gallus gallus cDNA 5', mRNA sequence [CN231822]	A_87_P020577	GTCCTCATCGGGCCTTCTAAAGTCTTCTCCAGTGTGCAATGGCTCTCGGGTGTGAAGCCT	up	1.40219	0.58218	up	1.29293	0.716067
PLAT	Gallus gallus tissue-type plasminogen activator (TPA) mRNA, partial cds. [U31988]	A_87_P009098	TCCCGTGGAATCCCGTGTTCCTAACGAGCAAGATTTACACCGCCCTGGAAGAGCAACGAC	up	1.40208	0.572713	up	1.24829	0.70957
RCJMB04_4a24	Gallus gallus finished cDNA, clone ChEST582j20. [BX930341]	A_87_P024352	AGGCAGTCCCCCGCGAACTACCTTACTGGGAACCATATTTTCTTCCGTCTTCAATTTTTT	up	1.40202	0.462237	up	1.35204	0.543604
BM426377	pgf2n.pk002.i10 Normalized Chicken Abdominal Fat Library (pgf2n) Gallus gallus cDNA clone pgf2n.pk002.i10 5' similar to gb [BM426377]	A_87_P034887	CAAAGCATCCCTGAGCATCTTAAGAGCATCCCCAACCATACTGCAGCATCCTGGACCGCC	up	1.40196	0.167668	up	1.37611	0.285158
CR353131	Gallus gallus finished cDNA, clone ChEST237h8. [CR353131]	A_87_P018143	ATACAGCAAAGACAAAGAGTTGCAGCAATACCAGTACTACAGTGCAGGACTGCTGTCTAC	up	1.4014	0.0307594	down	1.09512	0.703141
CYP1A4	G.gallus mRNA for CYP1A4. [X99453]	A_87_P008769	TTTTTTCTTCTTTTGGCAATAGATGTATGCATTATGGCTAATAAAAGGAAGGGTCTGAGG	up	1.40132	0.0126469	up	1.32525	0.0977081
ISL1	Gallus gallus domesticus (clone 1.7 kB) islet-1 mRNA, complete cds. [L35567]	A_87_P009470	GCTAAAACAAACAAGAAACCACCACGCTACTCAATGATCTTGAGGAGGATCGAAAAGACA	up	1.40129	0.237777	up	1.55813	0.198239
MAOB	Gallus gallus monoamine oxidase B mRNA, partial cds. [AY583537]	A_87_P035118	ACACTGAAATTTGGAAGCCAGAACCTGAATCGACTGATGTTCCAGCTTTGCCCATCACAA	up	1.40116	0.756042	up	1.61495	0.658599
CR389807	Gallus gallus finished cDNA, clone ChEST269f18. [CR389807]	A_87_P014578	GTGGCAAAGAGAACTTGCCAGCACGAGCAGCTACAAACCCTGTGCCCAGCAACACTTTTC	up	1.40115	0.535813	up	1.34784	0.637714
LOC427226	Gallus gallus finished cDNA, clone ChEST548d20. [BX931897]	A_87_P023749	TATCAGTCTGATGGTACCAAAAAGGACCCTCTAAAGATCAGTTCTATGACCTGGGGTTCA	up	1.40115	0.31194	up	1.64636	0.158491
CHCHD3	Gallus gallus finished cDNA, clone ChEST583e17. [BX930190]	A_87_P024402	TTACATCAGAAATCATACATCCGAAGACACTGTTCAGTCTTAGTAAAATCCACTTATTGG	up	1.40088	0.011544	up	1.31043	0.0455228
NMI	Gallus gallus finished cDNA, clone ChEST83j22. [BX950337]	A_87_P021680	GAAGATATTTTTGTCTGCCTCTTAACTTCCCCTTTTGTTTCCAGTTCTGACTCTGAAAGA	up	1.40078	0.0725297	up	1.38652	0.0167587
LSM11	Gallus gallus finished cDNA, clone ChEST311i8. [BX950474]	A_87_P021621	TTGTTAAAAGACTAATTGCCAAGTAGCTTATGCATGTGGGACCATTAGTAATTCTGTAGC	up	1.40057	0.451942	down	1.03998	0.943983
CR353128	Gallus gallus finished cDNA, clone ChEST821i9. [CR353128]	A_87_P018146	AGCTGAAAAGGGGGCAGATCAAAAATCTGCTCTGAATGCCTCTGAGAACTTAAAAAGGGA	up	1.40048	0.133166	up	1.14803	0.5237
UACA	Gallus gallus finished cDNA, clone ChEST62g15. [CR354191]	A_87_P017481	TGTGCAGAAGAGGATGTTTGAGTCAGAAGGCAAAGTTAAGCAAATGCAGACCCACTTTCT	up	1.40036	0.059054	up	1.36084	0.255956
MDN1	Gallus gallus finished cDNA, clone ChEST206o12. [CR385859]	A_87_P016872	TAATTCAACTTATAGCTTTTTCTCTGAAGTTGACACCAGCTGCCTCTCACCAGCTGTCTG	up	1.39995	0.612551	down	1.08103	0.922999
AJ720997	Gallus gallus mRNA for hypothetical protein, clone 32b15. [AJ720997]	A_87_P036016	ACAAGAAGTTCCTCATCCGCAGGATCCACTCTTTGCCTCCGAGGCTCCTGGGGAGCAGCC	up	1.39978	0.354425	up	1.16466	0.701488
MAP3K3	Gallus gallus finished cDNA, clone ChEST360p22. [BX932221]	A_87_P023589	GACAGAAACCATACCAGTTCTTCACCCCATTCTGGACTGCCCAAACAAGTCAGGATTAAA	up	1.39968	0.496682	up	1.54586	0.425294
IQCE	Gallus gallus finished cDNA, clone ChEST798i11. [BX931900]	A_87_P023748	GTCTCCAAATCCTCCTGGCAAAATCTGAGACTATGAAGAAAAAGTATGTTAACTCTTTTG	up	1.39946	0.013643	up	1.07827	0.586267
CR386708	Gallus gallus finished cDNA, clone ChEST302d17. [CR386708]	A_87_P016292	CCAGGAAGATGATATGAGCAAAATGGCTGAACAGATGAAAGCACAGGAAAGCTGTTGGCA	up	1.39911	0.242653	up	1.22459	0.510702
CV853982	gonad_EST01458 Embryonic gonad cDNA Library Gallus gallus cDNA 5', mRNA sequence [CV853982]	A_87_P010680	CCACAGTATATTCTAAGGGAATTCAAAGTTACAGATGCAAGGCATGGCCAGTCCCGAACA	up	1.39898	0.429575	up	1.10216	0.847771
TMC6	Gallus gallus transmembrane channel-like 6 (Tmc6) mRNA, partial cds. [AY581311]	A_87_P035122	GAGCAGATTGCCAATGAAGGGGAGGATAAAAGATTCCTCATTCGGAAGATTCGCTCCATT	up	1.39884	0.00264423	up	1.23004	0.0930963
RCJMB04_17m23	Gallus gallus mRNA for hypothetical protein, clone 17m23. [AJ720446]	A_87_P036406	TCGTTAATGAAGACACGGGCTCCCTATTTTTACCATGGGGCTTTCAGACCTTGGATTACT	up	1.39856	0.00583633	up	1.26483	0.0805161
EDA	Gallus gallus ectodysplasin A1 (Eda) mRNA, partial cds, alternatively spliced. [AY885699]	A_87_P035023	TTGTCTCAGTATTTCAAGTATTACTGCACTGATATTCTGCTCTGTGATCTTCACGTGGGG	up	1.39816	0.0921748	up	1.20206	0.15317
TNPO3	Gallus gallus finished cDNA, clone ChEST423p4. [CR386751]	A_87_P016263	ACTGTGCCCCTGGATCGCCTCGCAGTCATCTTCAGGCACACCAACCCCATCGTGGAGAAC	up	1.39788	0.338442	up	1.17835	0.682004
NR2F2	Gallus gallus orphan receptor (COdown-TFII) mRNA, complete cds. [U00697]	A_87_P009170	CCTTCGCACTGTCTCCTCTTCTGTCATAGAGCAATTGTTTTTCGTCCGTTTGGTAGGTAA	up	1.39749	0.0884838	up	1.45923	0.0650421
GAB1	Gallus gallus finished cDNA, clone ChEST18i3. [CR387804]	A_87_P015560	CTAATCTACCGTTTGTTGGTTCTCTCCCCTCACAACCACAATCTACCATATGTAAATTAT	up	1.39725	0.0102778	up	1.35651	0.0086873
BX932751	Gallus gallus finished cDNA, clone ChEST478n23. [BX932751]	A_87_P023380	TACTGTAGTAATTAACATTTTCTACGTGATGGGAGAGGTCCTGAACAACTACATTTGGGA	up	1.39712	0.0339736	up	1.27719	0.193997
IRF10	Gallus gallus interferon regulatory factor 10 (IRF10) mRNA, complete cds. [AF380350]	A_87_P037652	CCGCCACCTCCAGAAGCTCATCATGGCCCACGTGGAGCCGGTATTTGCACGAGAGCTCTT	up	1.39663	0.0431909	up	1.14627	0.274803
MERTK	Chicken c-eyk proto-oncogene mRNA, complete cds. [L21719]	A_87_P009488	CTGAAAGTTCATCTGGAGAAGCTTTTGGAAAGCCTTCCTGCCCCGAGGGGGTCCAAGGAC	up	1.39645	0.085202	up	1.35136	0.151767
CR407301	Gallus gallus finished cDNA, clone ChEST625o5. [CR407301]	A_87_P012163	CTGTGTACGTGGCACCAGAATGTGGTATGTTCCTATATTTGCTCAATCAAGATCTGCAAT	up	1.39615	0.00184732	up	1.4975	0.000562163
ZNF654	Gallus gallus finished cDNA, clone ChEST823i22. [CR387299]	A_87_P015914	GAGTGTTTAAAAAGATCCGATTTCTCAATAAACATGCAAGAAAAGCTCATCCGACTGATT	up	1.39603	0.50497	up	1.13519	0.827674
TMTC1	Gallus gallus finished cDNA, clone ChEST867n3. [CR389615]	A_87_P014704	AGGCAATTTTTGAATGCATGCTTACATTTGATCAAATAACAGGAGGCACTCAGCTCCTGT	up	1.39557	0.0101856	up	1.19702	0.0973493
GAPDH	Gallus gallus partial mRNA homologous to glyceraldehyde-3-phosphate dehydrogenase (GAPDH). [X01578]	A_87_P008983	ATGGGTGTCAACCATGAGAAATATGACAAGTCCCTGAAAATTCTCAGCAATGCATCGTGC	up	1.39552	0.00974131	up	1.27873	0.0844242
RCJMB04_14b10	Gallus gallus finished cDNA, clone ChEST910o6. [CR524250]	A_87_P011027	TCTGTGCATGTCTGGTGCCTTCAGCAGTGCCTCCAGCCCCTTCTCTTTCAGTGTTTGGAG	up	1.39549	0.119273	up	1.29375	0.292639
CN234856	WLA104C05.ab1 WLbrain Gallus gallus cDNA 5', mRNA sequence [CN234856]	A_87_P020509	TTGAAGCAGCCTCTAGAAACACATCCACTTGATCCAGGTAAAGCCTTGCCTTCTCCTAAT	up	1.39501	0.414007	up	1.13223	0.749203
AJ455421	AJ455421 riken1 Gallus gallus cDNA clone 5h13r1, mRNA sequence [AJ455421]	A_87_P037277	CTTAAACTCGATGAGATTTTGGACCCATGAGTTCTTTCAAGGGGTACACACCCCGAGAAA	up	1.39484	0.178545	down	1.18602	0.892359
SH3GL3	Gallus gallus mRNA for endophilin III (SH3P13 gene). [AJ439352]	A_87_P037384	GGTACCCTTGCCTCAGTGATTGTGTCATTCAAGCTGTGAACATGATTTCATGACTGAAAT	up	1.39435	0.0725297	up	1.43645	0.044204
HDHD1A	Gallus gallus finished cDNA, clone ChEST496o1. [BX932630]	A_87_P023418	ATTTCTAGTCTGTGCAAAGAGATTTCACCCTCCTGCACCTCCAGAGAAGTGTCTAGTGTA	up	1.3943	0.326868	up	1.21524	0.673198
CHRNA1	Gallus gallus mRNA for nicotinic acetylcholine receptor, alpha-1 subunit (nachra1 gene). [AJ250359]	A_87_P037488	TGCTAGTCTGCATTATTGGAACATTAGCTGTATTTGCCGGTCGCCTTATTGAATTAAATC	up	1.39401	0.191189	up	1.71721	0.0795359
AJ443625	AJ443625 dkfz426 Gallus gallus cDNA clone 36j2r1, mRNA sequence [AJ443625]	A_87_P037366	TGCCCTTCAAGCCACTGTTACTTAATTTGCCATGGGAAAATACCAGAATGGGGCATTCTT	up	1.39384	0.227154	up	1.50091	0.24664
LOC395744	Gallus gallus testis specific AQ mRNA, complete cds. [U78111]	A_87_P009016	AACTGGTGAGAGACAGAAAGGCAAGAGCTGCCTCCATGTAAACAGCTTAGTGTGATCTTA	up	1.39352	0.609681	up	1.33225	0.67981
BX936167	Gallus gallus finished cDNA, clone ChEST144f12. [BX936167]	A_87_P021775	ATCTCCTTGATACCAACCAACTGGATGCCAACTGCATACCCTTCCAGGAGTTTGATATCA	up	1.39346	0.449148	up	1.41004	0.546058
LOC417139	Gallus gallus finished cDNA, clone ChEST907f17. [CR389960]	A_87_P014464	CATCTGTTTCTTGATTAACAGGAAAGCAGTGCAGAAAGATGAGAATGAATCATTCATGCT	up	1.39307	0.117945	up	1.20617	0.372804
RCJMB04_17b10	Gallus gallus mRNA for hypothetical protein, clone 17b10. [AJ720408]	A_87_P036433	TCGTTTTGTCTCAGAACACAGAGAAGCAACCTTCGGCCCCTCCATGTTTAAGTCAAGAAA	up	1.39278	0.278277	up	1.41052	0.316427
GYG1	Gallus gallus mRNA for hypothetical protein, clone 16h16. [AJ720384]	A_87_P036445	GAACAAACATCTACCATTTATTTATAACTTGAGCAGCACTTCTGTATACTCTTACCTTCC	up	1.39275	0.0184176	up	1.28605	0.0724091
BI390667	pgp1n.pk001.o11 Normalized Chicken Pituitary [BI390667]	A_87_P034924	GTCACGGCGATGTATTACCTCTGGATGGCCAGCACCATTGGTCTCCTCCTGAACTTCCTC	up	1.39271	0.518039	up	1.33303	0.642148
BX934332	Gallus gallus finished cDNA, clone ChEST45a16. [BX934332]	A_87_P022638	CAGGACAGCCTTCTTTATCAAAGGACTGAGATTCTCCTACTACAGAAGCCTCTTCTTCCA	up	1.39246	0.0832708	up	1.25802	0.236985
DEPDC6	Gallus gallus finished cDNA, clone ChEST281o1. [CR353332]	A_87_P018007	CAGTCTGAAATGTTAGTCAGGCATTTTAACATGTTTTCAAATAAACACGTTCTAATGGGC	up	1.39244	0.282596	up	1.33094	0.392374
M30362	Gallus gallus (clone 3W-18) Ig rearranged heavy chain D region mRNA, partial cds. [M30362]	A_87_P009364	CTGATAGTGGTTATGGTTATTGGTATGCTGGTGCTTATGGCTGGTAGCATCGACGCATGG	up	1.39226	0.81348	up	1.24459	0.889407
PGC	Gallus gallus cPgC mRNA for pepsinogen C, complete cds. [AB025282]	A_87_P038183	CCCCTTCTCTTGCAAAATCGTTGCATTGAAGATGGGTTTCTTTCCAGACTGTACTGTGAA	up	1.39204	0.0652891	up	1.24567	0.185054
NR3C1	Gallus gallus glucocorticoid receptor mRNA, partial cds. [AF525751]	A_87_P037571	CAGTTGAGGGTCAGCACAACTATCTCTGCGCTGGAAGGAACGATTGCATTATTGACAAAA	up	1.39202	0.420688	up	1.58909	0.300645
CRABP1	Gallus gallus mRNA for cellular retinoic-acid-binding protein (CRABP gene). [X53701]	A_87_P008929	AAACAAGATCTATTGCAAACAAACTCTTATTGAGGGAGATGGTCCTAAAACATACTGGAC	up	1.39195	0.010407	up	1.17735	0.168636
LOC422830	Gallus gallus finished cDNA, clone ChEST739a15. [CR407129]	A_87_P012280	CCCATGAAGCTTTATTTGAGGAAGGAAGAAGTTGATCAGAGATCAGATGAGAAAGCATAT	up	1.39185	0.0938542	up	1.34199	0.17288
AB199732	Gallus gallus Six2 mRNA for sine oculis-related homeobox 2 homolog, complete cds. [AB199732]	A_87_P038050	ACCCGCTCTCGGCGTCAATGAACGGGAATAAGACAGTTCTGGGGAGCTCGGAGGACGAGA	up	1.39158	0.280632	up	1.54535	0.0786925
CO766854	spleen_EST02580 Spleen cDNA Library Gallus gallus cDNA 3', mRNA sequence [CO766854]	A_87_P019603	AACCTGGACCCCTCCCATTGCAGTAATAATGGCACAGTTCATCTCATATGCCAACTAGAT	up	1.39132	0.0269688	up	1.13406	0.593972
LOC404298	Gallus gallus Y-Lb III mRNA, pseudogene. [AB020220]	A_87_P038193	ACTACAACTACGAGATAGTGGCCCCTTTGACGCTGCAGAGGAGAGGTGAGTTCACGCGTC	up	1.39099	0.215342	up	1.55425	0.161607
PIK3C2B	Gallus gallus finished cDNA, clone ChEST49o7. [CR387615]	A_87_P015691	TCAACTTCTTCATCCACAACCTGGCGCAGATGAAGTTCACGGGCTCTGATGCCCGCCCAA	up	1.39056	0.606842	up	1.06352	0.932998
WFIKKN2	Gallus gallus finished cDNA, clone ChEST1025b16. [CR388471]	A_87_P015449	GTCCTATTCTTGCCTCCTCGTAGCAGCACTAATATATTTCGAGAGAAAAGCCTGTAAGTT	up	1.39001	0.643665	up	1.43541	0.680413
RCJMB04_21j12	Gallus gallus mRNA for hypothetical protein, clone 21j12. [AJ720613]	A_87_P036290	GACTCCAGCCATCCTAGAGGCTTCAGCAGGAGCAATTCAGAATCTGTGTGCTGGCAACTG	up	1.38976	0.0205976	up	1.19299	0.236697
BX935964	Gallus gallus finished cDNA, clone ChEST432o13. [BX935964]	A_87_P021865	TTTCTGCTTTGATCAGAGCTATCATTTCTGTGGGAAATAAAATCATACTTTATGCCTCTC	up	1.38966	0.238327	up	1.40214	0.266076
CR387172	Gallus gallus finished cDNA, clone ChEST783m13. [CR387172]	A_87_P016001	CAGTATGCATGATTTGACTACTATACAAGGAGATGAACCAGTAGGCCAGAGACCCTATCA	up	1.38932	0.101207	up	1.28505	0.283791
CO767131	spleen_EST02857 Spleen cDNA Library Gallus gallus cDNA 3', mRNA sequence [CO767131]	A_87_P019588	GATTAATGTCTCCGAGATAAAGATGGAGAAGGTACTATCCAGCCTGATGAAGGACGATCG	up	1.38922	0.106506	up	1.13192	0.489821
RCJMB04_19c8	Gallus gallus mRNA for hypothetical protein, clone 19c8. [AJ720499]	A_87_P036369	TATGCTGCCTGTGCAGTTTGTCACATTCGTGCTCCAGGTGATCAGCCGCTCCTTCCTCTA	up	1.38893	0.134482	up	1.25008	0.273898
STAT3	Gallus gallus signal transducer and activator of transcription 3 mRNA, complete cds. [AY641397]	A_87_P035094	AGTTCGAGTCGCTGACCTTCGACATGGAGCTGACCCAGGAGTGTGCTTCCTCACCAATGT	up	1.38883	0.0192541	up	1.4217	0.0286138
POU2F1	Chicken octamer-binding protein (Oct-1) mRNA, complete cds. [M29972]	A_87_P009367	CAGCCACTTCCACAGAGCCAGTCAACACCAAAGCGAATAGACACTCCCAGCTTGGAGGAC	up	1.38877	0.46879	up	1.58954	0.308346
GAL2	testis_EST00284 Testis cDNA Library Gallus gallus cDNA 3', mRNA sequence [CO769187]	A_87_P019426	GCAAAGCCTCAGCAGCAAGAAGACCCCTCTCATGTGTTAATGCAATATGTTTTGGTGTTG	up	1.38803	0.154699	up	1.04648	0.750973
HNRPLL	Gallus gallus finished cDNA, clone ChEST302p2. [CR386709]	A_87_P016291	TTGAAACTACACTTCGTTCACAAAGCTCTAAAGTGGTTGCTCTAACGTTGCCTTGTTTCA	up	1.38779	0.168199	up	1.49722	0.171129
BX934656	Gallus gallus finished cDNA, clone ChEST858a19. [BX934656]	A_87_P022488	GTGACAGCGTGGCGCTAGCAGTGCAGAACCCCATCGCCATCCCCACAACTTCCAGGTACT	up	1.38769	0.0115415	up	1.24466	0.0280875
PPP1R13B	Gallus gallus finished cDNA, clone ChEST527g14. [CR523339]	A_87_P011684	TGAATGGGTTTCAGTCTTACAATGGACAAGTAACAGGACCTGCAGCAGTCGAATTAAAAA	up	1.38747	0.0890342	up	1.28842	0.304427
CR523781	Gallus gallus finished cDNA, clone ChEST555n5. [CR523781]	A_87_P011374	ATAAATATTTTTAAATTTAAGTACCAAATTCTATATTTTATCTACTTGAGGCCTGATTCT	up	1.38737	0.355269	up	1.07982	0.85008
PPL	Gallus gallus periplakin (PPL) mRNA, partial cds. [AY574981]	A_87_P035134	CAGCAAGATCCCCAGCAAGAGAAGGAGCACTCCCTCCTCAAGCTGGAGCTGGAAGAAGAA	up	1.38731	0.0365091	up	1.39384	0.106853
PACSIN2	G.gallus mRNA for p52. [Z50798]	A_87_P008688	ACAACTCGGTCGTCTGTAACAGTGCCAAATAGTATGCATTTGTGACATTTAAAACTGGGT	up	1.38703	0.00135226	up	1.42716	0.00796911
LOC415987	Gallus gallus finished cDNA, clone ChEST282k8. [CR353336]	A_87_P018005	CTCTTCACTTAGACGTCTGTACAGTGTATCTGCCAAGGGAAGACAACGGTGCATGAATAT	up	1.3869	0.0338787	up	1.16972	0.179513
RALGPS2	Gallus gallus mRNA for hypothetical protein, clone 17i24. [AJ720434]	A_87_P036415	TACTGGGTAGCATTGTGTGGAACCCAACTCTTTTACTATGCTGCAAAATCTCTGAAGGCC	up	1.38678	0.0384458	up	1.24074	0.227476
BX930238	Gallus gallus finished cDNA, clone ChEST593f9. [BX930238]	A_87_P024389	TGGTGGTGGTGAAGGTCTGTTCTGCTCTCTTGGCCCTCAGCTCGGGCCTCTACTTTTACT	up	1.38669	0.55714	up	1.36695	0.628905
DMBX1	Gallus gallus paired-type homeobox Atx mRNA, partial cds. [AF461038]	A_87_P037610	ACTCCTCCTTCGAAATGGGGACACCGTCTGCCATGCCCTACTTGGGCATGAATGTTCAAC	up	1.38646	0.0823246	up	1.32469	0.138291
SETD2	Gallus gallus finished cDNA, clone ChEST330e11. [BX950362]	A_87_P021662	TCTTCCTACTCGAGGTCGGAGCGCTCACATTACTATGAATCTGACCGCAGGTATCACCGG	up	1.38589	0.0761676	up	1.37318	0.0954007
BM491349	pgp2n.pk006.c14 Normalized Chicken Pituitary [BM491349]	A_87_P034838	TGGATCCTTTTTGGATCTGGGATTGCTGGAACAAATGTCACGTTCCTGTTGCTTGTGGCA	up	1.38571	0.593165	up	1.23049	0.772475
CD214789	pgm2n.pk012.m3 Normalized chicken muscle cDNA library (pgm2n) Gallus gallus cDNA clone pgm2n.pk012.m3 5' similar to no significant hits (pLog(P) > 4), mRNA sequence [CD214789]	A_87_P021390	TGCTATCCATACAGCCTCGCTTGCTGGTAGGATGCTGCTTTGTACCCATGCTGGATCGTC	up	1.38562	0.365276	up	1.32703	0.479102
AM068204	AM068204 Chicken immune 3 - CSEQRBN33 Gallus gallus cDNA clone C0000485J02_T7, mRNA sequence [AM068204]	A_87_P035362	TTTCCTGTCCTGCTTCCCAGAGGTCAGGGTGTACGACCTCACACAGTATGAACACTGCCC	up	1.38561	0.393713	up	1.2723	0.55041
AJ443810	AJ443810 dkfz426 Gallus gallus cDNA clone 38b13r1, mRNA sequence [AJ443810]	A_87_P037361	AATGTTAGGTTTAATAAGGGAGATAAAAGCGTGCCAGAGGCTGTCCTGCGCGGGGCTGCG	up	1.38559	0.253411	up	1.1378	0.552521
GPR97	Gallus gallus finished cDNA, clone ChEST978n2. [CR406708]	A_87_P012588	TCCCACATCGTGAGGAATGACAGAACCATGGCTGTGTCACAGGGATAGCTGCTGGGCCTT	up	1.3855	0.580615	up	1.27529	0.739895
FOXF1	Gallus gallus mRNA for forkhead transcription factor, partial cds. [AB028627]	A_87_P038178	TCGTCTTCTCTTTCAACGCCATGGCCTCCTCCTCCATGCATTCAGCGGGCAGCGGCTCCT	up	1.38522	0.341679	up	1.27906	0.459525
WNT3A	Gallus gallus Wnt-3a homolog mRNA, partial cds. [AF109144]	A_87_P037887	TGAAGTGAAGACCTGCTGGTGGTCTCAGCCTGACTTCAGGGTCATCGGGGACTACCTGAA	up	1.38508	0.0068844	up	1.29669	0.119824
AJ720512	Gallus gallus mRNA for hypothetical protein, clone 19f23. [AJ720512]	A_87_P036360	AATTGATGGCGGCGCTGGGGCGGCTCCCCGGCCTCCAAATCGCGCAGTAAAAACATCCTT	up	1.38507	0.00156021	up	1.39175	0.0395479
CCDC80	Gallus gallus mRNA for equarin-L, complete cds. [AB086824]	A_87_P038112	TGTAATTTGCTGACTTTGCCACTGAAAGTAAGAATTTTTGGTTCTGGCAGTACTTGTTCC	up	1.385	0.0388155	up	1.18297	0.331542
SOCS2	Gallus gallus sdownpressor of cytokine signaling 2 (SOCS2), mRNA [NM_204540]	A_87_P009210	CCTAATTCACGATGGTAGCTCTCAGACTATTACTCAATAAAATCAATCAGATTGCACATC	up	1.38495	0.0259122	up	1.2673	0.133151
RCJMB04_26d13	Gallus gallus laminin gamma 1 mRNA, partial cds. [AF373841]	A_87_P037657	TGCCATCAAGATCCGTGGAACATACAGCGAGAGAAGTGCCGGCATCTGGATGACGTTACC	up	1.38457	0.238517	up	1.35201	0.318125
CR405860	Gallus gallus finished cDNA, clone ChEST885j9. [CR405860]	A_87_P013161	CTACCACCTCTCCCAGCACGGAGTGTTTTCTGAAAAAGAAATGAGGTTTTATGCTACTGA	up	1.38412	0.47043	up	1.4748	0.40899
BQ484818	pmp1c.pk006.m20 Chicken Macrophage cDNA library Gallus gallus cDNA clone pmp1c.pk006.m20 5', mRNA sequence [BQ484818]	A_87_P034807	GCTGGGGATAGGAAAAAAGTTGCCAAAATAAGTAGCTCATCCTTCAATCCTGCTTCCCAA	up	1.38343	0.600917	up	1.387	0.645534
AJ444340	AJ444340 dkfz426 Gallus gallus cDNA clone 40p1r1, mRNA sequence [AJ444340]	A_87_P037353	AGAGCGATATCTGGGCTTTGGGCTGTGTGCTCTATGAACTTGCCAGCCTCAAGAGGGCTT	up	1.38342	0.185701	up	1.45767	0.149969
AB161354	Gallus gallus IL11Ra mRNA for interleukin 11 receptor alpha chain precursor, complete cds. [AB161354]	A_87_P038072	CTGAGCCCCCCACCAGCTGTCAGCAGGCAGAAGGGAACCCTCCTTCTGTAATCTCAATAA	up	1.3833	0.0199891	up	1.12549	0.236985
PSMB7	Gallus gallus cpsmb7 mRNA for proteasome subunit Z, complete cds. [AB098728]	A_87_P038101	CTCACTGGCAGCTATGGCCATTTTTGAAGACAAATACAAACCGGACATGGAGGAAGAAGA	up	1.38321	0.00953885	up	1.25586	0.0631762
PGK1	Gallus gallus PGK mRNA, complete cds. [L37101]	A_87_P009466	TGCATCACCATTATTGGTGGTGGAGATACTGCTACATGCTGTGCGAAGTGGAATACTGAA	up	1.38292	0.0035171	up	1.32864	0.0367894
FRAS1	Gallus gallus finished cDNA, clone ChEST1002n18. [CR390083]	A_87_P014379	TCTCCTGCAAAGACACGTCACATGTGCTAAAAGCAGGGCTCTGCGTGGCCAGCTGTGGAA	up	1.38224	0.540384	up	1.55157	0.373901
SEMA3C	Gallus gallus collapsin 3 mRNA, complete cds. [AF022946]	A_87_P038007	CTTAATTTATTTGCAGCAGGAGATATCTTTGTCTCACTGTAGAGGCTTATATTTGCTGTG	up	1.3814	0.00250821	up	1.15983	0.31251
RPL36	Gallus gallus finished cDNA, clone ChEST980i10. [CR338894]	A_87_P018766	AAGTTTGTGCGAGATATGATCAGGGAGGTCTGCGGCTTCTCACCCTACGAAAGACGTGCT	up	1.3812	0.00902111	up	1.16384	0.204075
CR406169	Gallus gallus finished cDNA, clone ChEST844p8. [CR406169]	A_87_P012960	TAATGTCGATCAGCCTGAGGAATTGGGAGCCAGTGTTTCTGTGACTTTTGAAGAAATGGA	up	1.38089	0.096149	up	1.1202	0.71476
AW773252	EST00158 DT40subNB Gallus gallus cDNA clone 3G5, mRNA sequence [AW773252]	A_87_P035317	GGGTAGCATCATCTCTACTTTTCCCCCCAGTGGAATCTTACAACATCTATCTACAAACAG	up	1.38074	0.296567	up	1.57088	0.221587
LDHA	Chicken LDH-A mRNA for lactate dehydrogenase A chain (EC 1.1.1.27). [X53828]	A_87_P008928	CTCTGCCAGCTGAATAGCTTAAATATTTCACTGTTGGTAGGTCCAAATATTTTCCTAACA	up	1.38073	0.0040063	up	1.85404	0.00371638
CD215524	pgp2n.pk008.b12 Normalized chicken pituitary [CD215524]	A_87_P021384	TGAAGGCCAGCGCCAGTGTGCAGGACCAGATGCAGTTCTTGGAGGAAGCACAGCCCTACA	up	1.38068	0.42883	up	1.29814	0.608412
BX929528	Gallus gallus finished cDNA, clone ChEST976g12. [BX929528]	A_87_P024689	AAGGACCCACCTCTAAATGTTGACAAGGCCTTCCATGATCTCGTAAGGGTAATAAGGCAA	up	1.38058	0.209265	up	1.20612	0.451579
USP20	Gallus gallus finished cDNA, clone ChEST565l13. [BX950547]	A_87_P021587	TCCAGTCCTGCCAGGCTTGGGCCTTCCTATGTACTCAAGAAAGCCCAGATGCAGGCTTCT	up	1.38046	0.338471	up	1.32515	0.428577
RCJMB04_2k8	Gallus gallus mRNA for hypothetical protein, clone 2k8. [AJ851430]	A_87_P035784	GAACAGTTGCCAAACTGGAAAAGTCCATTGATGATCTGGAAGACAAACTTGCTCAAGCAA	up	1.38015	0.0051703	up	1.06984	0.531187
CR386699	Gallus gallus finished cDNA, clone ChEST303m13. [CR386699]	A_87_P016299	GCTGTGGCTTCCCTCTGGGAAATCTCTTGAAAATAAAATTGCCCAACTGGAGGCTGGGTG	up	1.38014	0.132111	up	1.19528	0.454554
HMGCS1	Chicken HMG-CoA synthase mRNA, complete cds. [M60657]	A_87_P009322	GTGGCATCTGTTCATAGTGGAGAAATTCATTCACAGCCTGTCTCAAATTAACTGCCGGAA	up	1.37982	0.0694434	up	1.36991	0.130044
RCJMB04_7p22	Gallus gallus mRNA for hypothetical protein, clone 7p22. [AJ851575]	A_87_P035679	CAGCTGTGAGACAAACCTGAGCACTGAAAACGCCAGCAGAAGAGGTAGTAAGAAGAATAT	up	1.37969	0.022754	up	1.24001	0.221636
CR523498	Gallus gallus finished cDNA, clone ChEST246o17. [CR523498]	A_87_P011568	AGCCTGATGCTCTGTTAAAACAAGCTTTTGACCAAGCTCTTGAATTCCGTAAAAACAAAA	up	1.37947	0.052859	up	1.27676	0.219957
CITED2	Gallus gallus cited2/melanocyte specific gene-related gene 1 MRG1 mRNA, complete cds. [AF262935]	A_87_P037735	CGATGCTGCCGCCCAATGTCATAGACACTGACTTCATCGACGAGGAGGTCCTCATGTCCT	up	1.3794	0.04529	up	1.37307	0.0933736
ZNF650	Gallus gallus finished cDNA, clone ChEST935o14. [CR390324]	A_87_P014231	ACTTGTCCTCTATGTAGGCAGTTTGCTAACAGCGTTCTTCCTTGTTATCCTGGAAACAAC	up	1.37936	0.287116	down	1.03466	0.938957
BM489650	pgm2n.pk011.j16 Normalized Chicken Breast Muscle, Leg Muscle, and Epiphyseal Growth Plate cDNA library (pgm2n) Gallus gallus cDNA clone pgm2n.pk011.j16 5' similar to no significant hits (pLog(P) 4), mRNA sequence [BM489650]	A_87_P034844	AGTATAGGACAGCCAAAAGCAGGGAGTACACAGCAGAGCAACAGGCTATAAGAATACAAT	up	1.3789	0.310577	up	1.18931	0.670471
RPL4	Gallus gallus mRNA for hypothetical protein, clone 25p23. [AJ720803]	A_87_P036163	GCTGAAGAATCTGAGAGTCATGATAAAGCTGAACCCATACGCCAAAACAATGCGACGCAA	up	1.37885	0.0141144	up	1.2629	0.0331654
BX930545	Gallus gallus finished cDNA, clone ChEST631m16. [BX930545]	A_87_P024260	TGATACCAATGCCGGTCTGCCTGAATTATCAGATCAAAGTCTGCTGTGCTCCACCATTAA	up	1.37873	0.776576	up	1.71045	0.628575
ZIC3	Gallus gallus ZIC3 protein (ZIC3) mRNA, partial cds. [AF188736]	A_87_P037809	GGTGGTGGTGATGTTAAACTGATGGAAATTCTTTTTCGCCTTAGTGGTGATTGTTTAAAC	up	1.37864	0.0625993	up	1.33759	0.104756
PIAS1	Gallus gallus PIAS1 (PIAS1) mRNA, complete cds. [AY549568]	A_87_P035142	GGCGCGGACACGGCGTCTATCTTTGGTATCATATCAGACATTATTTCGTTGGACTGATTT	up	1.3773	0.04721	up	1.22184	0.21453
PPTC7	Gallus gallus finished cDNA, clone ChEST720p22. [BX950783]	A_87_P021462	GTATGATCCCACTTACATGTCACCCTTTGCACAGTTTGCATGTGACAATGGCTTGAACGT	up	1.37717	0.132853	up	1.41104	0.122117
M28488	Gallus gallus (clone AV36) ribosomal protein S6 kinase (rsk) mRNA, complete cds. [M28488]	A_87_P009370	TTTCTGCTACTGGCAAGTTTGATTATTAGTTCCCAATCAACCAAGTGCTGTTACTTTTTT	up	1.37712	0.0231434	up	1.40938	0.0141373
AGRN	Gallus gallus domesticus agrin mRNA, complete cds. [M94271]	A_87_P009275	CCAACCCGTGGAAGTCAACTCTTGATCTATCATCATGCCCCAAAAACCCAATGGTTATGT	up	1.3771	0.0260725	up	1.23138	0.204915
APOH	Gallus gallus finished cDNA, clone ChEST157g11. [BX932102]	A_87_P023655	CTTCAGCGGCCCTGCCACACTACTTCTCTTTCAATATTTCCAGCTTTTATGTCATTGTAA	up	1.37708	0.518455	up	1.31745	0.487766
COL19A1	Gallus gallus finished cDNA, clone ChEST745i3. [BX931737]	A_87_P023804	ATGCCAGCAAAATATACACTCTTCCAGGAACACAGCAAGAATCTACGGACAGATGCCACT	up	1.377	0.196676	up	1.36598	0.233745
BM426852	pgf2n.pk004.o7 Normalized Chicken Abdominal Fat Library (pgf2n) Gallus gallus cDNA clone pgf2n.pk004.o7 5' similar to gi [BM426852]	A_87_P034883	AGCACCCCATGTCAAGTATATGAAGAAAGATGATGATGTGCCATGCTCTATCACAAGCTC	up	1.37699	0.625972	up	1.46054	0.614985
BG710162	pgl1n.pk002.l20 Normalized Liver Library Gallus gallus cDNA clone pgl1n.pk002.l20 5' similar to gb [BG710162]	A_87_P034967	GGAAGGTGGTGCTGCGCAGTTGGTACGAGAAGAACAAACACATCTTCCCGGCCAGCAGAT	up	1.37667	0.33771	up	1.10215	0.806498
SOHO-1	SOHo-1=sensory organ homeobox-1 [chickens, embryonic retina, mRNA, 1819 nt]. [S69380]	A_87_P009189	ATAAAGGTTGAACGTGCAATCGTGGTGTGGCGAAATTCAGAAGTGCGTGCTAAAATGGGA	up	1.37663	0.150593	up	1.74892	0.0707603
GLIS2	Gallus gallus Gli-Krdownpel zinc-finger protein NKL (NKL) mRNA, partial cds. [AF249339]	A_87_P037744	AACAAACGCTACTCCAACTCCAGCGACCGCTTCAAGCACACCCGCACGCACTACGTGGAG	up	1.37659	0.399433	up	1.31046	0.510106
LOC419479	Gallus gallus finished cDNA, clone ChEST834e18. [CR406415]	A_87_P012792	GCTGGAAAATGGAATATGCAAGTATTATACATATGCTGCAAGCCCTTATCTTTAGCTATG	up	1.3756	0.0586985	up	1.45116	0.0543677
LOC415766	Gallus gallus finished cDNA, clone ChEST520a8. [CR385563]	A_87_P017070	CTGGTAGACTTGCTGCTTCAGAATGGTGCAATGACACACATACGGAATGAAAGGAACTGT	up	1.37499	0.522835	down	1.33766	0.603924
MYL4	Chicken myosin light chain L23 mRNA, complete cds. [J02823]	A_87_P009549	CAAGCCTTAAATTATTCTTTTCAGGTTTTCCTGTGTCATTTGCATCATTAAACCTCATTC	up	1.37468	0.00574787	up	1.28256	0.0589502
BX933078	Gallus gallus finished cDNA, clone ChEST906p7. [BX933078]	A_87_P023212	CAGTGCACCCCACAGTGCTCTTATGCGTTTGCTTCCCACTGGGTGCACCCTTGCAATAGA	up	1.37465	0.238394	up	1.33887	0.228194
FZD4	Gallus gallus Frizzled-4 (cFz-4) mRNA, complete cds. [AF224316]	A_87_P037767	ACAGTTCATTCCTGCTCCGTCCCAGCAGCGTGTATTGTTTCAATGGCAATGTTGAAACAT	up	1.37397	0.0165588	up	1.35844	0.0397311
BX933439	Gallus gallus finished cDNA, clone ChEST47h9. [BX933439]	A_87_P023029	CACCGAAATTCGTGACAAAAATAAACAGCGTGACTGTTGTGGTTGGTGAACCAGTGGAGT	up	1.37369	0.612551	up	1.04528	0.952246
YWHAE	Gallus gallus mRNA for hypothetical protein, clone 1e8. [AJ719304]	A_87_P037184	GATGAAAACCAGTGAGACACAAAGGCCAACAAGAGAACCCATCTCTGACCACCCTTCCCC	up	1.37365	0.0262859	up	1.22288	0.112399
CR386525	Gallus gallus finished cDNA, clone ChEST332p7. [CR386525]	A_87_P016420	TTACATCATCTCACTAATTTAATCAATCGAAGGAAAGACGAGAGCTCAGCTGTCTCCAAA	up	1.37362	0.0918292	up	1.19519	0.297327
AGL	Gallus gallus finished cDNA, clone ChEST484h20. [BX936061]	A_87_P021818	TTCACTGGCTGATCAGTTAGAAGTAAATCCTGAATTTTCAAGCCATAACAAAAAATGCAC	up	1.37327	0.194104	up	1.25723	0.340753
CCND3	Gallus gallus mRNA for hypothetical protein, clone 10g19. [AJ720095]	A_87_P036648	AGCTCTCACCTGGCTTACGTGACCAAAATGTCCGTGACCCCCTCATCAAGCACAGGGTGG	up	1.37308	0.0629824	down	1.01438	0.941697
MYCBP2	Gallus gallus finished cDNA, clone ChEST487a3. [CR387447]	A_87_P015810	TTTCTGGCTGATGGCATTACCAGATTCTAAAACTATGAAAGCTATGGGGGGAGTTCAGAG	up	1.37287	0.578938	up	1.67991	0.39056
RAB3GAP2	Gallus gallus finished cDNA, clone ChEST80g1. [CR387808]	A_87_P015556	ACCTGACTGATGTTTTATTGCATGTTTTGCTGGAGATCTCTGCAGAGTCTCAGGAATTGT	up	1.37256	0.0761897	up	1.4237	0.0722124
BX933573	Gallus gallus finished cDNA, clone ChEST46k22. [BX933573]	A_87_P022962	TCGGTGTACTTCAGTGCCAGCACAGGTGACATCACCTCTCCAGGTGCAGTGATGGTGACA	up	1.3725	0.242653	up	1.10089	0.772775
P11	Gallus gallus domesticus cellular ligand of annexin II (p11) mRNA, complete cds. [M38592]	A_87_P009338	AACCAGCGCGACCCTATGGCGCTGGATAAGATCATGAAGGACCTGGACCAGTGCCGGGAT	up	1.37244	0.0279347	up	1.12702	0.30388
CR385261	Gallus gallus finished cDNA, clone ChEST791f8. [CR385261]	A_87_P017239	TTCAACAGCAAAAGGGATGAGATGTGGAAAGAGAACATCAACAAGTGCTCCGTCATTTGG	up	1.37223	0.21984	up	1.35131	0.247856
SALL1	Gallus gallus spalt 1 (SAL1) mRNA, complete cds. [AF288697]	A_87_P037718	GGGAACCTTGGACTGTTACATGCACTTTCTCGGAAAGTTGAAAGGAAAAAGAGGTCCAGT	up	1.37218	0.022755	up	1.26292	0.0799419
RCJMB04_25b17	Gallus gallus finished cDNA, clone ChEST643k4. [CR524108]	A_87_P011140	TATAGATTTGGTAAATACAACACAGGATTTCAGAGGAGCAGGAACTATCTCATCCTTGCT	up	1.37196	0.211941	up	1.35354	0.272635
CR386547	Gallus gallus finished cDNA, clone ChEST768h20. [CR386547]	A_87_P016401	GTGGAACAAAAGTCAGTCGTACCTTCAGCTACCTCAGGAATAAAATGTCCAGCAGCAAGA	up	1.3717	0.0209821	up	1.22936	0.07988
KDELR3	Gallus gallus finished cDNA, clone ChEST75f19. [BX935103]	A_87_P022264	CACAGGAAGTAAAAGGGAAACTGTCACTGTCCTTCAGTCCCCAACAAATGCCATAGTGAA	up	1.37132	0.0256432	up	1.23736	0.228388
HBD	chicken hemoglobin beta chain mrna. [J00860]	A_87_P009554	CGGAGCACCTACAACCATTGCATGCACCTGCAGAAATGCTCCGGAGCTGACAGCTTGTGA	up	1.37128	0.365644	up	2.31232	0.088915
CFKH-1	Gallus gallus mRNA for transcription factor cFKH-1. [Y17794]	A_87_P008718	ACCAAACGCCACAAAGTGTTTCCCCCTACCCCCGGGAAGGGTCGTTAACACGGACTGAAA	up	1.37121	0.0342777	down	1.00614	0.981101
TBC1D7	Gallus gallus finished cDNA, clone ChEST59m21. [BX934094]	A_87_P022745	CTTGTTTTTGTTGCTTTGGAGATACTGTTAACCTTTAAAATGAAGATAATCGCACTGACC	up	1.37105	0.000891615	up	1.17351	0.014293
CV859074	gonad_EST06550 Embryonic gonad cDNA Library Gallus gallus cDNA 5', mRNA sequence [CV859074]	A_87_P010499	AGCCAAACAGTAAGAAGAAGTCCCCTTCATTTATCACTTCCATAAAGTTAATTGAAAGTC	up	1.37083	0.0637444	up	1.49538	0.0595657
AJ719870	Gallus gallus mRNA for hypothetical protein, clone 7i4. [AJ719870]	A_87_P036801	AAGGGGTTGGCACATACAAACCCCCGGATGGGGAGCACATCCGGGCTGTTTTCAGCATTT	up	1.37028	0.0554319	up	1.40759	0.0319028
KCNRG	Gallus gallus finished cDNA, clone ChEST987f2. [BX950320]	A_87_P021690	TACTTGTTACCACCAGACCTGCTGTACGGGTCACTGCAATAAATGTCACTGTTTCTAGAG	up	1.36986	0.105042	up	1.19771	0.41149
NEDD4L	Gallus gallus late domain-interacting protein 1 mRNA, partial cds. [AF412121]	A_87_P037628	ACCTGCGAGAGAAGCTCCTTATGGCAGTTGAAAATGCACAAGGATTTGAAGGAGTGGATT	up	1.36982	0.0518917	up	1.27437	0.224521
AJ719371	Gallus gallus mRNA for hypothetical protein, clone 1l5. [AJ719371]	A_87_P037135	AGGTACGCTGGAGCAATCTCCTTGGAAGGATTCAGCACGAGTAGATGGTAAATGTGAAAT	up	1.36955	0.00756318	up	1.13919	0.105808
NRF1	Gallus gallus nuclear respiratory factor 1 (NRF1), mRNA [NM_001030646]	A_87_P009258	GGTGGAAGTGGTAACTTTGGAACAGTGACCATAACCCACAGCAGGATCACGATGATTTAT	up	1.36917	0.121983	up	1.2128	0.325828
CR523920	Gallus gallus finished cDNA, clone ChEST673l11. [CR523920]	A_87_P011279	GCAACCCAGGCCATTCTATGAGTCTATGATTCTGGTCCAGCTGAAGTATAACATCAGTAT	up	1.3691	0.0108979	up	1.25001	0.0394854
SLC9A3R2	Gallus gallus finished cDNA, clone ChEST843d10. [CR406170]	A_87_P012959	TCAGGGGTGGAGGAGAGGATTTCTCTTTTACGAAAGTGCAAACTGTTGATGGGCTGAATA	up	1.36903	0.212969	up	1.35873	0.101555
CYP8B	Gallus gallus finished cDNA, clone ChEST731n14. [BX934837]	A_87_P022383	GTGTGCTGTTTGTTCAGATATTGCTGTGAAATAAACCGCCTGAGTTGTTGGCTGCTGGAT	up	1.36899	0.000891615	up	1.38059	0.0016904
RCJMB04_20p24	Gallus gallus mRNA for hypothetical protein, clone 20p24. [AJ720599]	A_87_P036299	GGCAGGAAACTAACAGTGACTCTTCTGGATGCTGGAATTGCCACCTATCCTCAAGAATTT	up	1.36876	0.729565	up	1.51839	0.663451
PTCD2	Gallus gallus finished cDNA, clone ChEST646k9. [CR406599]	A_87_P012673	CAGATCTGGTTTGCTAGAAGAAGTAATAAAAACTTTAGAGGCAGCGATGGACGTAGATAC	up	1.36865	0.221683	up	1.20337	0.384747
BG713305	pgl1n.pk003.d13 Normalized Liver Library Gallus gallus cDNA clone pgl1n.pk003.d13 5' similar to gi [BG713305]	A_87_P034948	ACAACTACTGCCGTGAGGACGAGGAGATCTACAAGGAGTTCTTCGACGTGGCCAACGATG	up	1.36847	0.342956	up	1.35465	0.41998
AJ454178	AJ454178 riken1 Gallus gallus cDNA clone 37p19r1, mRNA sequence [AJ454178]	A_87_P037289	CTTCTTTTCATTTAATGCATCTCCAGCCTTTTTAGCTTTTTCTACATCCAGAGAGCCAAG	up	1.36828	0.793123	up	2.41452	0.306023
AJ719369	Gallus gallus mRNA for hypothetical protein, clone 1k23. [AJ719369]	A_87_P037136	GAGAAACACTTTAGAGATGTGGAAAGCCACAAGGTAATGCAGCGTTCACAAGCACAGCAA	up	1.36819	0.0517064	up	1.15051	0.2173
KCNH6	Gallus gallus partial mRNA for HERG protein (erg gene). [AJ271210]	A_87_P037478	AAGACATTGTGGTTGCCATCTTAGGGAAGAACGACATCTTTGGGGAGCCCATCAGCCTCT	up	1.36801	0.727865	up	1.11735	0.911884
EBF	Gallus gallus early B-cell factor 3 (EBF3) mRNA, partial cds. [AY270035]	A_87_P035219	TTTCTAAAGTTTTTCCTCAAGTGCAATCAGAACTGTTTGAAGAATGCAGGCAACCCACGA	up	1.36794	0.116967	up	2.14246	0.0188654
RCJMB04_1k9	Gallus gallus mRNA for hypothetical protein, clone 1k9. [AJ719364]	A_87_P037140	TTGGCATTTTGTAAAGACACTAAAACTCCCTAAGACGTTTCTAAACCATGAAAACTGAAC	up	1.36783	0.0310957	up	1.29522	0.169057
PCDH21	Gallus gallus photoreceptor cadherin (prCAD) mRNA, complete cds. [AF426394]	A_87_P037624	ACATTGTGTTCTGTGCCCAGTTAGGACTGCAGTTCCTTCATCCCAGGTCCCAGTGCTGGT	up	1.36758	0.756989	up	1.42602	0.756704
BX256914	BX256914 AGENAE Gallus gallus multi-tissues normalized library (gcag) Gallus gallus cDNA clone gcag0001c.g.20 3prim, mRNA sequence [BX256914]	A_87_P025211	TTTAAAAAGAGAACGTCATCACCTTCAGTCAGTGCCATCTCAATCTGGTCTCTCAGAGAC	up	1.36711	0.696714	up	1.13122	0.90707
NKX2-5	G.gallus mRNA for CNkx-2.5 protein. [X91838]	A_87_P008792	CACCCGTTCGGACGTGTTTCCCTTTGCTGTACGAGCTGACGGAGATCAGCGAGTTGTCAT	up	1.36698	0.0187339	up	1.15617	0.172814
LOC423366	Gallus gallus finished cDNA, clone ChEST843i18. [BX934660]	A_87_P022487	TGCTGCTGTGGTCCAACTGTGTAACTTGCATGTGTGTGTTCTGCAGGGGCCATTTCTAAT	up	1.36666	0.010451	up	1.23674	0.0592491
AJ719991	Gallus gallus mRNA for hypothetical protein, clone 9c4. [AJ719991]	A_87_P036716	TTGCTGCTGAAGATATCTCCTCCTCTGTCACTCAGGCAGAACTTACTGTTGATTCAGACA	up	1.36613	0.444419	up	1.66709	0.233528
BX935655	Gallus gallus finished cDNA, clone ChEST324o22. [BX935655]	A_87_P022020	CTGACCTCATGCTGGTGGCCCCTCTTGATGCAAACACGTTGGCAAAGCTGGCAAACGGTA	up	1.36597	0.275776	up	1.17646	0.560867
RCJMB04_17p9	Gallus gallus mRNA for hypothetical protein, clone 17p9. [AJ720455]	A_87_P036402	AGAGCAAACGTCCATTCTTTGGTACCTCTTTTCAACTTTATCATAAAAGGATTAGAACGT	up	1.36585	0.252431	up	1.17362	0.571468
CR390272	Gallus gallus finished cDNA, clone ChEST937g20. [CR390272]	A_87_P014261	TCTCTTATCTGGGAACTGATGCCTTGTCTGCCAAAAGAGGGGATATTTGCTGTTGATACT	up	1.36576	0.268878	up	1.16493	0.657302
CR385715	Gallus gallus finished cDNA, clone ChEST571h12. [CR385715]	A_87_P016967	CACATCTCCTCCAGAGACACGCAGGTGACCCCTTTTGATGTGGGGCCCAATTTCTCCCAT	up	1.3656	0.658318	down	1.06029	0.934836
PDE8A	Gallus gallus finished cDNA, clone ChEST551i22. [BX929682]	A_87_P024630	TCATAGACCATAGACATTCCAGATACTTTGATGCGGAAGCATTGTGCAGGTCTATCAGAA	up	1.36541	0.259333	up	1.37668	0.312667
ABCC10	Gallus gallus finished cDNA, clone ChEST635p7. [CR733006]	A_87_P010847	GATGACAGCTTGCCATTTATCCTTAACATTTTCTTGGCCAACATGTATGGGCTTTTGGGC	up	1.36485	0.240988	up	1.65164	0.29748
EPHB2	Chicken embryo kinase 5 protein (CEK 5) mRNA, complete cds. [M62325]	A_87_P009318	TGCTCTGAGGATCATGGCAACAGGAAGAAATGCCCTATCATTGACAACGAGAAGTCATCA	up	1.36471	0.342531	up	1.42536	0.332314
CV861167	gonad_EST08643 Embryonic gonad cDNA Library Gallus gallus cDNA 5', mRNA sequence [CV861167]	A_87_P010110	TTGGAGGTTATCCTGGTGATGTGAAACAGAACTGTCTTACAAGCAAGAGCTCATTCCATG	up	1.36469	0.031228	up	1.27365	0.110506
CR354364	Gallus gallus finished cDNA, clone ChEST530p1. [CR354364]	A_87_P017370	TGCTATAAAAGATGTGGATACTTTGCCCCGTCTCCAGCGTCTGTTCCTCAGCTTCAATAA	up	1.36463	0.428239	up	1.15046	0.747245
BX934758	Gallus gallus finished cDNA, clone ChEST731o19. [BX934758]	A_87_P022435	GCTGAAGCCTGGAGGAGAGATGTACTTCAGCGATGTCTATGCCAACCAGCACCTGAGTGA	up	1.36431	0.0144601	up	1.31683	0.0367894
CN233134	WLB057F07.ab1 WLtestis Gallus gallus cDNA 5', mRNA sequence [CN233134]	A_87_P020533	ATCACAATGGAGGCAGTAAATTACTTCAAAGATCTGTACTCAAAGGACAAGCGTTTTCAG	up	1.36423	0.125714	up	1.43919	0.136
BG712472	pgl1n.pk012.l14 Normalized Liver Library Gallus gallus cDNA clone pgl1n.pk012.l14 5' similar to sp [BG712472]	A_87_P034953	ACCACCGGCACTGAGAAGGGATCGGGCCACAGCCATGATGGCGTACATGTTGGAGGGGAA	up	1.3642	0.273846	up	1.18405	0.599173
LOC420369	Gallus gallus finished cDNA, clone ChEST20d17. [CR389165]	A_87_P014988	GACAGGGCTGGGCAGCACAGCTGTGCCCATGGTGTCTAAAATGCTCCAGGCCATTTTCAT	up	1.3642	0.119044	up	1.0895	0.669031
TMEM47	Gallus gallus finished cDNA, clone ChEST883l13. [CR388761]	A_87_P015257	TCAACTGGGGCTATGGCCTGGCTTGGGGTGCAACTATATTTTCATTTGGGGGTGCCATTC	up	1.36412	0.141982	up	1.3334	0.0935888
CENTD3	Gallus gallus finished cDNA, clone ChEST532k8. [CR352348]	A_87_P018653	TGTGCACAGCGCGTGGTCCTGGTGATGGAGGGTGGCTTCTGCTTATCTGGGGTGTTTATA	up	1.36408	0.20148	up	1.3914	0.280602
PKP4	Gallus gallus mRNA for hypothetical protein, clone 12j12. [AJ720205]	A_87_P036565	TTGTGCTTGAGAAGAAATGGAATGGCCTCATTTGATGTCTTGGTTATGAAATCTGAAGGT	up	1.36341	0.0188508	up	1.26855	0.0495267
AADAC	Gallus gallus finished cDNA, clone ChEST1022j9. [BX931204]	A_87_P024018	TATTCGGTGTCGAAGTTCTTCCTGCAGAGCAGAGTGCTCTCCCAGTACGGCGTAGACCCA	up	1.36334	0.587984	up	1.15745	0.685518
VAMP3	Gallus gallus finished cDNA, clone ChEST980n12. [BX929338]	A_87_P024763	TTGAAACGTTAACTTTACCTGGTTGCCTTAAGACACTCCTGTCAGTTACTAACAGCCACC	up	1.36325	0.0920018	up	1.07996	0.673198
BX950688	Gallus gallus finished cDNA, clone ChEST527i8. [BX950688]	A_87_P021512	GTGGAGGAACAGTCAAAGGAATTGGAAAGTCTTCCTCTTCCTGTGGTCAAAGAGGATGAA	up	1.36272	0.16264	up	1.40205	0.0360094
BX933504	Gallus gallus finished cDNA, clone ChEST662m21. [BX933504]	A_87_P022994	CTATCGTTGTTTATGTGAGGATGGCTACTTCATGCATTCAAATAAACGAGATTGCAGAGA	up	1.36258	0.0989063	up	1.48789	0.0779719
CO766885	spleen_EST02611 Spleen cDNA Library Gallus gallus cDNA 3', mRNA sequence [CO766885]	A_87_P019602	CGCGCCAGCACAACAGGGATCCAATGTGTGGCCATAAAAGCCAGGCTTGTTTTTTAATGG	up	1.3625	0.0423783	up	1.33327	0.0404471
GLDC	Chicken glycine decarboxylase mRNA, complete cds. [M64402]	A_87_P009313	TACTTCACGTACTACTGGTAGCATTGCTAATGTTAATATTTCGTGCCGTTTTTTATCTAC	up	1.36245	0.13847	up	1.3226	0.234781
CR405744	Gallus gallus finished cDNA, clone ChEST571m16. [CR405744]	A_87_P013223	GAGTCCTCAGGCTGCAGTTAATGCTCAGAACTGGGCAAATCAATGTTCTTTAAGTCACAG	up	1.36237	0.429119	up	1.45515	0.388899
LOC395261	Gallus gallus mRNA for filamin, complete cds. [AB056474]	A_87_P038138	ATCTTTTGCGGTCTTCCATCCGCTCCACTCCATTCATCTTTCGCTCCCATTGGAGTCTGT	up	1.36215	0.239541	up	1.16894	0.500692
AM067107	AM067107 Chicken immune 3 - CSEQRBN33 Gallus gallus cDNA clone C0000473G06_T7, mRNA sequence [AM067107]	A_87_P035373	GTCCCGATGGTCGGTTCCATTTTCCTCTTGAGGCGCATCGTCCGTCCGCATCCGAACCCA	up	1.36176	0.426589	up	1.00905	0.986262
BX929923	Gallus gallus finished cDNA, clone ChEST765b12. [BX929923]	A_87_P024525	GCGTGATGAGATCCGCCAACTGGAGAAACAGGTAGAACAAAAGGAGAGACAATTAATAGA	up	1.36167	0.157676	up	1.11212	0.646457
CNTFR	G.gallus mRNA for growth promoting activity (GPA) receptor alpha. [Z48168]	A_87_P008692	GCCGTGGCAGTGTGTTGGACAGCTGGACTGGTCTTGGCTGCCTATGGTGTCCTCTTTATT	up	1.36157	0.691715	down	1.02649	0.978544
CACNG1	Gallus gallus finished cDNA, clone ChEST844b3. [BX934624]	A_87_P022504	GTCTTGACAAAATTTGTATTTTTTCAGATGTCGGGATCTCCCCATACGATGTGCACTCCA	up	1.3613	0.0407541	up	1.62048	0.0465527
BX930376	Gallus gallus finished cDNA, clone ChEST625m22. [BX930376]	A_87_P024327	GCTGCTGAGGAAGCTCTGCCAAGGATCGTAGATATAATGGGGAAAGAACTTAACTGGAAT	up	1.36111	0.0821977	up	1.10425	0.669446
RCJMB04_11h6	Gallus gallus mRNA for hypothetical protein, clone 11h6. [AJ851617]	A_87_P035653	TGGATGAACTTTGCAGTCATTACTGTAATAATTATATTGGAGGTTATTTCTGTACCTGCC	up	1.36105	0.701711	down	1.13374	0.850676
CN217685	RJA016D09.ab1 RJbrain Gallus gallus cDNA 5', mRNA sequence [CN217685]	A_87_P020856	AGGTCAAAGATGCGAGTAGTTTAGAGGTTGAAAAGAGAGAGGAAAGCATTCTTCTACTAC	up	1.36104	0.276103	up	1.53796	0.154756
CR352513	Gallus gallus finished cDNA, clone ChEST828f17. [CR352513]	A_87_P018544	CGTGAAATATACAAAAGGTTGCTTAGTTCTTGCGTTGTTTCCAGCACCCTCGTTTGAATG	up	1.36084	0.293648	up	1.22046	0.547892
BM488488	pgm2n.pk007.m24 Normalized Chicken Breast Muscle, Leg Muscle, and Epiphyseal Growth Plate cDNA library (pgm2n) Gallus gallus cDNA clone pgm2n.pk007.m24 5' similar to gb [BM488488]	A_87_P034852	AAGCGCGAGAAGATGCAGCGCTTCCAGAGCAAACAGCAGAAGGCCATGCAGGCCCAACCG	up	1.36076	0.540701	up	1.34771	0.572536
BX935178	Gallus gallus finished cDNA, clone ChEST865h5. [BX935178]	A_87_P022227	ACAGCGTTTGTGCAGAAGAAAGAAGAGCAGGATTTGGTGCACAGACTGAAGGTTGAGAAA	up	1.36013	0.497229	down	1.01571	0.983807
GdRAD54	Gallus gallus putative recombination factor (GdRAD54) mRNA, partial cds. [U92461]	A_87_P008996	AGCTCAAGGAGCTGTTTTCATTGAATGAGACCACCATCAGTGACACCCATGACAAGATCA	up	1.36009	0.0669953	up	1.31726	0.145556
AJ851439	Gallus gallus mRNA for hypothetical protein, clone 2n18. [AJ851439]	A_87_P035776	TGAGACAACAGCAAATATCCCTAAAATAAGTAGCAGGCCTGTTGAGTCAAAGGAGACAAT	up	1.36	0.038871	up	1.04019	0.773582
FBLN1	Gallus gallus fibulin-1, isoform D precursor (FBLN1) mRNA, complete cds. [AF051399]	A_87_P037962	TGGTATTCAGATGAACACGTTAAACTATCCACCTCCTATGCACCAAATCAAGGCACATGT	up	1.35974	0.0109026	up	1.38083	0.0155055
MYH1	Gallus gallus mRNA for skeletal myosin heavy chain, complete cds. [AB021180]	A_87_P038190	AAGATAGAAGAGGAGGAATAAGGCTCACAAGGCTAAAGTGTGACCTGAGGCATGCATAAA	up	1.35927	0.129625	up	1.46373	0.0875651
RCJMB04_19j12	Gallus gallus mRNA for hypothetical protein, clone 19j12. [AJ720527]	A_87_P036350	CAACGCCGAGCTGGTGTGGTGCCAGGAGGAGCACAAGAACCAGGGCTACTACGACTACGT	up	1.35926	0.0741355	up	1.07213	0.61669
RCJMB04_6d2	Gallus gallus mRNA for hypothetical protein, clone 6d2. [AJ851546]	A_87_P035696	TTATCCTGTTGGAACGTGTCTCTACAGAAACTCCATTTTTGTTTCAGTGCTATTAAAGAA	up	1.35924	0.00418053	up	1.34672	0.0413133
LOC416585	603369183F1 CSEQRBN19 Gallus gallus cDNA clone ChEST273e21 5', mRNA sequence [BU464737]	A_87_P025964	CTTCTCTGGATGCAAGAGATAGTCCTGTAAGCTTCAACAAAGCCTTTTGCTGTGCAGTTC	up	1.35894	0.274653	up	1.60436	0.0563557
COL3A1	Gallus gallus alpha-1 collagen type III (COL3A1) mRNA, partial cds. [U07973]	A_87_P009158	TGGACCTGCGGGAGACCGTGGTCAAGATGGAGGCCCAGGTCTTCCAGGAATGAGGGGTTT	up	1.35887	0.00699989	up	1.18215	0.204915
UBE2F	Gallus gallus mRNA for hypothetical protein, clone 8m10. [AJ719958]	A_87_P036740	GTGACAAGGAGGACTTCAGGAATAAAGTTGAAGATTACATTAAGCGCTACGCGAGATGAT	up	1.35843	0.0829267	up	1.36338	0.0783138
CR390130	Gallus gallus finished cDNA, clone ChEST162h9. [CR390130]	A_87_P014353	GATAGCAGAGAAGAATCTGTGTTGGGTAGCATACCATTGCCCAGCTATGTAATATCTCCT	up	1.3584	0.137378	up	1.29298	0.298273
AY620401	Gallus gallus downstream stimulatory factor 2 (USF2) mRNA, complete cds. [AY620401]	A_87_P035107	CAGATGGACAACGACCTGCTGCGCCAGCAGGTGGAGGAACTGCAGAGTGAGAACGCCGTA	up	1.35775	0.594696	down	1.22699	0.670102
BX930270	Gallus gallus finished cDNA, clone ChEST585d5. [BX930270]	A_87_P024383	AGACACCTCACATGCCAGTTAAAACACCTACTCAGGCTTCACTGCAATCTGAAAAGATCA	up	1.35759	0.0381532	down	1.07131	0.580295
AJ442795	AJ442795 dkfz426 Gallus gallus cDNA clone 31l5r1, mRNA sequence [AJ442795]	A_87_P037376	AGATGTGAACTAGTATTGGTAGCAAATTCTTAGCTTTCTACTTTCATGTTCTGCATTCAG	up	1.35738	0.378185	up	1.20872	0.379424
PDE6G	Gallus gallus phosphodiesterase 6 gamma subunit rod form mRNA, complete cds. [AY226461]	A_87_P035236	GCAGAGGCAGACGCGGCAATTCAAGAGCAAGCCACCCAAAAAGGGGGTGCAGGGGTTTGG	up	1.35736	0.00532402	up	1.39196	0.00690575
LOC395478	PP1M M21 subunit=protein phosphatase 1M 21 kda regulatory subunit [chickens, gizzard smooth muscle, mRNA, 1598 nt]. [S74622]	A_87_P009184	GAAACTCTCTGAAATGGAGGAGGAGATGAAGATACTGACGGAGCTGAAATCGGACAATCA	up	1.35734	0.104002	up	1.21369	0.341917
CYP11A1	Gallus domesticus mRNA for cytochrome P-450scc, complete cds. [D49803]	A_87_P009773	AGATCGAAACCAAGCGGGCGGTGGAAGTTGGGACCAAGTTCGACCTCATTCTTGTCCCTG	up	1.35729	0.0274376	up	1.24029	0.101555
EFNB2	Gallus gallus ephrin-B2 precursor, mRNA, complete cds. [AF180729]	A_87_P037818	GACTATGGACATCCAGTGTACATAGTACAAGAGATGCCTCCTCAGAGTCCAGCAAACATT	up	1.35721	0.363386	up	1.19428	0.659199
LOC395463	Gallus gallus winged helix protein CWH-5 mRNA, partial cds. [U37276]	A_87_P009088	CGCATTGACCCTGCCTCTGAAGCTAAACTAGTAGAGCAAGCATTTAGAAAACGAAGGCAA	up	1.35715	0.246498	up	1.86513	0.079488
BX930453	Gallus gallus finished cDNA, clone ChEST599e18. [BX930453]	A_87_P024289	AGAGAGAGAGAGACTTCAGGAAGGAAAGTATCAGTGCAGTGTATGAGCAGAACACATGAT	up	1.35658	0.219299	up	1.34527	0.261485
CR385781	Gallus gallus finished cDNA, clone ChEST63l18. [CR385781]	A_87_P016926	TGACAGCTATGGCAACGTTACAGGTTGAGATTGCATAGCCAAGCAACTGTTTCTGGAGTT	up	1.35613	0.064712	up	1.26381	0.163455
ZBTB38	Gallus gallus finished cDNA, clone ChEST983p10. [BX929416]	A_87_P024729	CCCAAAATTTGCAAGACGGCAGCTGCTCTGGGAATGCACCAGAAGAAACATCTATTCAAA	up	1.35602	0.13196	up	1.29506	0.235659
THEDC1	Gallus gallus finished cDNA, clone ChEST386m20. [BX934632]	A_87_P022501	TCTTTCTGCTGAATTGCATTGTTATGCCTAAAAGGTACCCTGTTCCTCCAGAAGATCTTC	up	1.3559	0.17021	up	1.16965	0.518106
KBTBD10	Gallus gallus finished cDNA, clone ChEST65p1. [CR405927]	A_87_P013107	AATTAATTTCGCCTGGAATTGAAGTGCATATTGAAAACAGAAGCACCAACCTTAGCCAGA	up	1.35554	0.211767	up	1.55964	0.158119
C1QBP	Gallus gallus mRNA for p32 subunit of splicing factor SF2, partial cds. [AB029946]	A_87_P038174	GTCAAATGTCAGTAGGTTAGGAAAGCAGTGCTCAGTGTGGGCATTACACAGCAGTGCTCC	up	1.35499	0.0875626	up	1.32154	0.181994
RCJMB04_18e15	Gallus gallus mRNA for hypothetical protein, clone 18e15. [AJ720464]	A_87_P036394	CGTTTCAGTAGAAAATGCTTCTCGCAGTGTTTGCATGGAGAAGTGTAAGGTTATTGCTCA	up	1.35499	0.53831	up	1.32415	0.642116
TC189240	B57484 cell division control protein CDC37 homolog splice form 2 - chicken (fragment) {Gallus gallus;} , partial (37%) [TC189240]	A_87_P008063	ATGTTCTAAATGTGTGCATCGGTTAGATGCGTGTCATCAATATGTGATGTTTCTTTAAAC	up	1.35462	0.63141	down	1.28078	0.721546
BM439944	pgr1n.pk001.l17 Normalized Chicken Reproductive Tract cDNA Library (pgr1n) Gallus gallus cDNA clone pgr1n.pk001.l17 5' similar to gi [BM439944]	A_87_P034870	GCTGCCAGCATCTGTGCCAAGGTCGCCCGTGACCGCGCAGTGAAGTGTTGGAACTTCACA	up	1.35433	0.4807	up	1.11312	0.857882
PLA2G4A	Gallus gallus cytosolic phospholipase A2 mRNA, complete cds. [U10329]	A_87_P009154	TTTTTTAACTGGATTCACAAAGACATGAGAGAATCACTGCTCTTGAAATAAAGGGCTGTG	up	1.354	0.027981	up	1.5535	0.0382299
BX929936	Gallus gallus finished cDNA, clone ChEST760k8. [BX929936]	A_87_P024516	AAATGGTATTGCCCCAAGTGCAGAGGAGATAACGAGAAAACGATGGACAAATGTACTGAC	up	1.35389	0.046976	up	1.23459	0.166292
BX935955	Gallus gallus finished cDNA, clone ChEST432j8. [BX935955]	A_87_P021872	TCATTGCCCTGAAGTATTTTCAGATGAAAACTTATTGCTCTCACACATTCATCAAGCCCA	up	1.3537	0.391149	up	1.12864	0.761612
LOC423492	Gallus gallus finished cDNA, clone ChEST613c23. [BX934489]	A_87_P022571	CCCAACCAAGTTGTCCTTAGAGGATGTATTTAGCACCATGAAGACTTTCAGAGATCTCTT	up	1.35369	0.334072	up	1.21491	0.588825
LOC418034	Gallus gallus finished cDNA, clone ChEST355p9. [CR390635]	A_87_P014023	AGGGTGCTGCCATGGCTGCCTCATGAGGAGGCAGTAGGATTTGGACAAAAGAGTGCTGCA	up	1.35358	0.104246	up	1.08748	0.735302
AMOTL2	Gallus gallus finished cDNA, clone ChEST983j2. [CR338944]	A_87_P018723	CTGTGGGCACATCCCGTGCTTTCTCTCAAAGGAAGAGAATGGGGAGTAATGAAACAAAAA	up	1.35345	0.0052103	up	1.45407	0.02863
ITGA8	Chicken mRNA for integrin alpha 8 subunit. [X58519]	A_87_P008908	CCTTAAGAACATATTCACCACTGAACAAACTGTTTATTCCATATTTCGGTCAGTCTACAT	up	1.35333	0.0598764	up	1.47749	0.0591105
CCNB2	G.gallus mRNA for cyclin B2. [X62531]	A_87_P008886	ACCCTAGGCAGATGTGTTCTGATGATATATGCACTTTGTGTCATCCTCATTTGCCTACTG	up	1.35301	0.00885868	up	1.26197	0.367249
BX930407	Gallus gallus finished cDNA, clone ChEST595n7. [BX930407]	A_87_P024313	CTGCTGCCCATAAATAATGATGACAATTATCATAAAGCAGTTTCCACTGCCAATCCCCTA	up	1.35291	0.436977	up	1.6642	0.111648
CN228570	RJB092C08.ab1 RJtestis Gallus gallus cDNA 5', mRNA sequence [CN228570]	A_87_P020686	TGAGCGAATCTTTGGCTCTGCCTCAGAAACCTTTGGGAAATTCATTTTGAAAGCTTGGGC	up	1.35288	0.547386	up	1.39186	0.564961
GAL12	Gallus gallus gallinacin 10 prepropeptide mRNA, complete cds. [AY534898]	A_87_P035146	ACTGCTTTGAACCCGTCATTCTCTGCTGTAAACCTCTGTCACCAACTCCCACCAAGACCT	up	1.35244	0.572452	up	1.12741	0.851642
RCJMB04_33p3	Gallus gallus mRNA for hypothetical protein, clone 33p3. [AJ721067]	A_87_P035965	CAGGCTCCGCTGGTTCGCTGAAGGAAAGCACAATGGAAACACTACAAATGCAATATCTTA	up	1.35224	0.0314338	up	1.2813	0.094464
CN218892	RJA041B07.ab1 RJbrain Gallus gallus cDNA 5', mRNA sequence [CN218892]	A_87_P020840	ACCTGAAGGCCGACAACCAACGGCTGAAGGATGAGAACGCGGCGCTCATCCGCGTCATCA	up	1.35216	0.1546	down	1.69515	0.709978
CD527053	CRG126 Embryonic Day 18 (E18) Chick retina library Gallus gallus cDNA clone CHICK RETINA CLONE-126, mRNA sequence [CD527053]	A_87_P021337	TCTTTGACATGAGCCTCACCTACATCCTGGTGGCCTTGGTGGCCGTCATCCTCAACAACG	up	1.352	0.0795379	up	1.20169	0.307195
CN238073	RJB120D06.ab1 RJtestis Gallus gallus cDNA 5', mRNA sequence [CN238073]	A_87_P020415	TCGGCTCGTGGTGTGCAGCAGTCACTCATCATTTGCACAAGTGGGGATTCCACCAGGCAA	up	1.35166	0.569679	up	2.01858	0.219208
LOC417398	Gallus gallus finished cDNA, clone ChEST741d15. [BX931697]	A_87_P023817	CCCCAATATCCGTGGTACTTTCCCCCCTTTTTAAACCAACTAATATTGATTTTGTCCTAT	up	1.35163	0.40422	up	1.48616	0.330194
HIVEP2	Gallus gallus finished cDNA, clone ChEST743k14. [CR390931]	A_87_P013842	GTGAATTATAATTATGTGAAACCAAGTTTGTATATTGACTTACAATACATTTAAGGAGTG	up	1.35131	0.0475102	up	1.16954	0.285183
CBX4	Gallus gallus mRNA for chromobox protein (CHCB3), complete cds. [AB005619]	A_87_P038215	ATGGAGTCCCTAGATCACCTTATAAACTATATCAGACGACTATTTTCTGTTCTCCTTTTT	up	1.35127	0.0181942	up	1.22982	0.101913
DGCR8	Gallus gallus finished cDNA, clone ChEST196d24. [BX933340]	A_87_P023080	TCTCCATGAGTGCCTTAAAAGAAACCATGGAATGGGTGACACATCCATAAAATTTGAAGT	up	1.35121	0.168525	up	1.09004	0.726699
LOC420716	Gallus gallus finished cDNA, clone ChEST377l3. [BX930676]	A_87_P024210	GATTAAAACTCAGCAGTGGTAAGTGTGCCATGAAATTTTTCCTGTCACATTTTCAAGTCA	up	1.35113	0.00403927	up	1.24311	0.0876437
BI066215	pgf1n.pk007.g19 normalized chicken fat cDNA library Gallus gallus cDNA clone pgf1n.pk007.g19 5' similar to no significant hits (pLog(P) 4)G, mRNA sequence [BI066215]	A_87_P034936	TCTTGTCTGCTCACAAGCTCTCGGGCCTCTGGAACTCACAGCACACCAACGGGGCCACAC	up	1.35113	0.500357	up	1.01509	0.981021
GPR125	Gallus gallus finished cDNA, clone ChEST317o19. [CR389742]	A_87_P014620	GCAGTACTGAGGGAATATGCATACGATGTTCCTACGAGCGTTGAAGGAAGTGTGCAAAAT	up	1.35108	0.485922	up	1.07099	0.890039
LOC422752	Gallus gallus finished cDNA, clone ChEST790g9. [BX931803]	A_87_P023779	AGCTGCTGCTGATTTGCTCTTTTGGGTCACTTGGTCATTTAGTTCAAGAGGTTTTGCCAG	up	1.35064	0.719949	down	1.04115	0.963078
ZUBR1	Gallus gallus finished cDNA, clone ChEST51n15. [CR387646]	A_87_P015666	TTCCTAGATTGCTTCTGTAAAATAGCAGCGGGAATTAAGAACAACAGCAACGGGCATCAG	up	1.35055	0.414719	up	1.37046	0.255695
RCJMB04_11f2	Gallus gallus mRNA for hypothetical protein, clone 11f2. [AJ720137]	A_87_P036619	TAAGTTTTCTTTCTAAGTTACTGGCTCTTGCAGATTCTGCTGAGAACGGTGTACTGCTTT	up	1.35041	0.0424543	up	1.11381	0.458432
FKBP9	Gallus gallus mRNA for cFKBP/SMAP, complete cds. [AB008675]	A_87_P038209	CTCCCTGAGATGCTCTTTAGAAACTGGTATTTTGATTGGGCAAAAACATTTTGTATTGGT	up	1.35031	0.0725297	up	1.22822	0.285451
MGP	Gallus gallus mRNA for matrix GLA protein. [Y13903]	A_87_P008735	TAGCAGAGATCAGAGAGAGTTCAGGATGTGGGTGTTTGCTGCACAATAAACTGCTGGTTT	up	1.35028	0.013775	up	1.43607	0.00638811
CN222683	RJA088C07.ab1 RJbrain Gallus gallus cDNA 5', mRNA sequence [CN222683]	A_87_P020800	CAGCACCTCCCTCTTACCTTGGAGCATTCACAATGAAATATCTCATTCCAAATAACATTA	up	1.34964	0.56646	up	1.52923	0.296134
BASP1	Gallus gallus CAP23 (CAP23) mRNA, complete cds. [AF521668]	A_87_P037573	GCGACTAATTCGGATCAAACCATAGCAGTGCAAGATTAAATTGGACAGCCTGTTGAAACA	up	1.34962	0.0266341	up	1.18656	0.0844242
LOC426582	Gallus gallus finished cDNA, clone ChEST289d10. [CR406679]	A_87_P012611	AAGCCGAAATTTGACAAGAGCAAATACAACAAGGCAGGCAAAGAACAGCATCCGGTGAAG	up	1.3495	0.268356	up	1.22211	0.465674
LOC395507	Gallus gallus ATP-gated ion channel receptor P2X8 mRNA, complete cds. [AF205066]	A_87_P037786	ACTGTCTTGCAGGTAATTAGACACTGCGTGCATTTGAGTGCCTGTATTTCACTGGACACA	up	1.34923	0.395818	up	1.25748	0.535644
ITGA3	Gallus gallus integrin alpha 3A subunit cytoplasmic domain variant mRNA, complete cds. [AF330146]	A_87_P037679	CATGCTCACCCCCCATCTGCTGGGGGCCAATAAAGCCTTGCTCTGGGATTTGTAACCTCT	up	1.34923	0.00100712	up	1.28153	0.00690383
HOXA6	Gallus gallus HOXA6 (HOXA6) mRNA, complete cds. [AY307380]	A_87_P035208	AAAGGAAAACAAATTCATAAATTCCACCCAGCCCGGCAGCGACGAAACAGAGGAAAAGTC	up	1.34906	0.0664708	up	1.01319	0.96514
ASAHL	Gallus gallus finished cDNA, clone ChEST553f7. [BX950518]	A_87_P021602	TCTATTTTGTGTGGAATGTAGGTGTGAACATAATGAAATAAAAATATGCGGCTGATTGCC	up	1.34896	0.106605	up	1.23866	0.241588
CHD6	Gallus gallus finished cDNA, clone ChEST93d1. [BX934592]	A_87_P022525	AGGTAGATCGAATTCTGGAGGTGGCTCACACGAAGGACCCTGACACTGGAGAGGAGGTGA	up	1.34883	0.60496	up	1.45168	0.527657
AJ392136	AJ392136 dkfz426 Gallus gallus cDNA clone 10f10r1, mRNA sequence [AJ392136]	A_87_P037446	TGCAGAGGGAACCTGCTCCGTTTGAAGCTCGATCTGTGGGGGCTGGAGTGGGTGCTCACT	up	1.34863	0.303298	up	1.29772	0.345322
ALX4	Gallus gallus paired type homeodomain protein (Alx-4) mRNA, complete cds. [AF092538]	A_87_P037910	CAAATCCAGAACCCCTCTTGGATTGGCAACAATGGAGCTGCCTCCCCTGTGCCTGCTTGT	up	1.34809	0.133573	up	1.14465	0.445327
CR390785	Gallus gallus finished cDNA, clone ChEST637k5. [CR390785]	A_87_P013931	GATGGCAGAGTTGCAGCTCTCAATTGTTAGCGATCCAAAAAACAGGAAGGCGATAGAGAA	up	1.34783	0.237275	up	1.36323	0.271657
TGFB3	Chicken transforming growth factor beta (TGF-beta-3) mRNA, complete cds. [M31154]	A_87_P009358	CCTGGATTTTGGAGCCATTCACTCATGATCTGATAACACTCTGAGGACCTTTTGTCTGTT	up	1.34772	0.00790147	up	1.23484	0.122328
LOC421743	Gallus gallus finished cDNA, clone ChEST470g24. [BX932116]	A_87_P023644	TGACCTTCCTGCAGGACAGGCTGAAGGGTGATGCTGTGACAGAAATAGGAATTACATTTT	up	1.34739	0.407052	up	1.31908	0.347237
AJ719581	Gallus gallus mRNA for hypothetical protein, clone 4b4. [AJ719581]	A_87_P036995	AACAGTCTAAAAATCAACGGACTCCCCCCATAATTTCTTAATGTACACCCTTAATCTCTG	up	1.34739	0.216058	up	1.10475	0.708164
CTNNA2	Gallus gallus mRNA for alpha N-catenin, complete cds. [D11090]	A_87_P009824	TACCAGCAGGGTTTTATATTCTTTTTGTATGCATACCTGCCGACTTGTATGCGTCTGGCA	up	1.34737	0.0168753	up	1.18744	0.153573
RELN	Gallus gallus extracellular reelin (Reln) mRNA, partial cds. [AF090441]	A_87_P037912	CTGTCTATTATCATAAATCTAATGCTTCACTTTATGGTGAACCAAGCTAAAGATCCATGC	up	1.34704	0.305212	up	1.36682	0.397991
MYST3	Gallus gallus finished cDNA, clone ChEST62b19. [CR385809]	A_87_P016907	CAGGGCGTAGGTCCAAAATTTCAGATAAAGAGGAAAATGTTGAACAAAAAGAAGAGCTGC	up	1.34686	0.0903168	up	1.18203	0.45197
AJ851519	Gallus gallus mRNA for hypothetical protein, clone 4g15. [AJ851519]	A_87_P035717	CTGGCCCTGTTGTTACCCCCATAGGAAAACTACGAGGGTGTTTTGGTGGAAAAACAAAAA	up	1.34678	0.138781	up	1.24323	0.229641
RCJMB04_4k4	Gallus gallus mRNA for hypothetical protein, clone 4k4. [AJ719621]	A_87_P036967	GGATGCATTGACTTCCAGGCAGTCCTGGGTGGCTCTAAATAAAAAATTCCTTGCACCTTT	up	1.34654	0.0160838	up	1.24109	0.0628969
COL11A1	Gallus gallus alpha-1 type XI collagen chain mRNA, 3' end. [M88593]	A_87_P009279	ATGACTTTGGCGATCAAAGCCAAAAGTTTGGATTTGAGGTTGGTCCTGTCTGCTTCCTTG	up	1.34642	0.178801	up	1.14899	0.525277
JAKMIP2	Gallus gallus finished cDNA, clone ChEST201m23. [CR391129]	A_87_P013703	GTCTTTGCAGCGCATAGAAGATAAACTCAAAGCAGTCACTAAAGAAAATATAGAAATGAG	up	1.34634	0.575318	up	1.01065	0.987299
CN226347	RJB046F02.ab1 RJtestis Gallus gallus cDNA 5', mRNA sequence [CN226347]	A_87_P020750	GTCTGTGAAGAGATGGAATGCCCAGGAAGACAACGTCATCTACCGCCTGCTCGTGCCCAT	up	1.34626	0.570188	up	1.15933	0.825913
BX932979	Gallus gallus finished cDNA, clone ChEST992k22. [BX932979]	A_87_P023252	TGTTTGGGATTGAAACTGCTATTGAGAATCTGATCCAAGTGGTTGGGCTTGGAAAAATGA	up	1.34617	0.00318878	up	1.32525	0.00749696
NOTCH2	Gallus gallus Notch2 mRNA, partial cds. [AB052936]	A_87_P038142	CTGCTGCTGTCAACAATGTGGAAGCAACACTAGTGTTACTGAAAAATGGAGCCAACAGAG	up	1.34597	0.0193756	up	1.21635	0.1579
SLC22A5	Gallus gallus finished cDNA, clone ChEST551e10. [CR353033]	A_87_P018204	AATGAAATGCCTACTTCCTGATGGACTGCAAGTTACATGGATTTGCTCCTAGTGCTCATT	up	1.34581	0.0785051	up	1.35399	0.127156
CN229469	RJB071G12.ab1 RJtestis Gallus gallus cDNA 5', mRNA sequence [CN229469]	A_87_P020638	GGAGAAAACTGCGAGCCTTCCTTGAGCAGTTCATGCAGCTGTAGCCACCAACCCTGCAGA	up	1.34548	0.0466033	up	1.25556	0.192206
KAL1	Gallus gallus finished cDNA, clone ChEST987p22. [CR386644]	A_87_P016339	AGTATTGACAACTGGTGGGGAAGGACCAGCTACTATAAAATTGTTCCGAACACCTGACCT	up	1.34536	0.336344	up	1.31295	0.456602
RCJMB04_23o9	Gallus gallus mRNA for hypothetical protein, clone 23o9. [AJ851739]	A_87_P035575	TTTTTTATTATTCTTTTTTAATTATTTCTTTTCCCGTCGCTTTGTGGGTTGTTTTTGTTT	up	1.34494	0.128562	up	1.14513	0.479895
BX930041	Gallus gallus finished cDNA, clone ChEST980m9. [BX930041]	A_87_P024466	CCATCAGCTGGTGTGAGATGCAGTGCCCACAGACACACACCAAGGACTTCCGTAAGGTGG	up	1.34467	0.00470153	up	1.22581	0.0107365
AJ392900	AJ392900 dkfz426 Gallus gallus cDNA clone 13g22r1, mRNA sequence [AJ392900]	A_87_P037440	CCTGAATTCTGCTTCATGTACCCATTTTACTTTTTGGGAGCTATTGGTTCTTACCCTTCG	up	1.34447	0.340113	up	1.44705	0.270871
AJ446114	AJ446114 riken1 Gallus gallus cDNA clone 12h9r1, mRNA sequence [AJ446114]	A_87_P037330	GAGAAGAAGACATTGACTTGCACTTAGGAGATATATTAACTGTGAATAAAGGTACCTTAC	up	1.34444	0.441218	up	1.30264	0.50513
CR338732	Gallus gallus finished cDNA, clone ChEST267f13. [CR338732]	A_87_P018881	TTCACCACCCTGTAATAATGGTTTCCACATTAAAGAGAAAAAGCCTCTGTTGCATTTTTA	up	1.34439	0.014902	up	1.3525	0.0385861
LOC423867	Gallus gallus finished cDNA, clone ChEST577e11. [CR523326]	A_87_P011693	ATGGTGATTTTGGTGATGGTTATTACGAGTTTGTTGGTATTAGTTTTCCAGAACACTGCT	up	1.34431	0.462844	up	1.46166	0.21887
SYT1	synaptotagmin p65=synaptic vesicle protein [chickens, embryonic brain, mRNA, 2551 nt]. [S64957]	A_87_P009194	ATTTAGCCATAGTTCTAAATGCACTTCAAAGTAAGCCAAAAGAGAACAGCTAGTGACCTT	up	1.34429	0.295117	up	1.6398	0.100936
CO505636	GGEZEB1020A03.g embryo breast muscle - EB1 Gallus gallus cDNA clone GGEZEB1020A03, mRNA sequence [CO505636]	A_87_P020266	CTTTCACGGCCAGCTCCATCGCTGCTGCCCTCTCAGAACGTGTTCCTGATGGTCAGCTCG	up	1.34411	0.163821	up	1.21355	0.218705
BZRAP1	Gallus gallus finished cDNA, clone ChEST916e16. [CR390100]	A_87_P014372	GCTCACCTTGACCACGCACTGGCTGGGGACTCCGCCTTATTTATTTATTTATCTAACTAT	up	1.34374	0.217795	up	1.35491	0.285158
BCKDHA	Gallus gallus mRNA for branched-chain alpha-keto acid dehydrogenase E1-alpha subunit, partial cds. [AB035083]	A_87_P038169	CTGGAGCGCCACCTGCAGCACTACGGGGAGCATTACCCCATGGAGCTCTACGAGAAGTGA	up	1.34359	0.0314434	up	1.14195	0.313866
CR523280	Gallus gallus finished cDNA, clone ChEST607b10. [CR523280]	A_87_P011721	GTCACTTTCCCTCAGGTTCTATTTTCTTATTCTAACCTTCAAAACTGTCACCTCTTAAGG	up	1.34355	0.0168207	up	1.07481	0.510646
BGP1	Gallus gallus beta globin protein 1 (BGP1) mRNA, complete cds [AY775302]	A_87_P035047	CCAGTCCGATGAACCTAGGGCATCCTGTAACTATAACAAGTCCATTATCCATGACATCTC	up	1.34321	0.184321	up	1.46522	0.144883
BX933461	Gallus gallus finished cDNA, clone ChEST662h13. [BX933461]	A_87_P023019	TCTTGCCAGCCATATATCTGATGGAGAACGTGGCGATGGAAGAACTTATCACCAAGCAAA	up	1.34315	0.0765568	down	1.08008	0.816451
LOC423162	Gallus gallus finished cDNA, clone ChEST191e8. [BX933309]	A_87_P023103	TCTGAGTGTCTTTACTCAAAAATCCCAGGTCCATGGGATGGGGAAAGACTGTTCATGTGA	up	1.34221	0.229443	up	1.33548	0.285298
ILF2	Gallus gallus finished cDNA, clone ChEST980g19. [BX929375]	A_87_P024748	AGAGTGGCAACTTCAGGGTCCACACGGTCATGACTTTGGAGCAGCAGGACATGGTGTGCT	up	1.34213	0.00997517	up	1.24841	0.0313234
CR524452	Gallus gallus finished cDNA, clone ChEST442b1. [CR524452]	A_87_P010888	AGTGCCCCCAGTAATCCCAGTGTCCTGACAGCTGGCAATAACTTCAGGGCCATCAGCACT	up	1.34211	0.197677	up	1.36215	0.263104
LOC427434	Gallus gallus finished cDNA, clone ChEST554k23. [BX934764]	A_87_P022431	AATATGACACACGACAAGCATCGAACCGCTGGGAGAAACGAGCTATGGAAAAAGAGAACA	up	1.34199	0.0903168	up	1.05129	0.823972
LOC416740	Gallus gallus finished cDNA, clone ChEST48g17. [CR353215]	A_87_P018089	CTGCTGCATTACCTCCCTGACAGGGGCTGATCAGTTTCTTCCTAATGAATGTGTATAGTT	up	1.3414	0.0120717	up	1.13001	0.236985
SYNPR	Gallus gallus synaptophysin IIa mRNA, complete cds. [U27708]	A_87_P009113	GCCGACCTCCTTCGCTATCAGATTTAAGGTGCCCGCGTTGCGAGCTTCTTACATCCCTCA	up	1.34122	0.333724	up	1.30755	0.465777
CR523422	Gallus gallus finished cDNA, clone ChEST289p2. [CR523422]	A_87_P011620	TCCCTTGCGTTGCTGTGTGTCATGTTTTTAAGAAAAGCCCCAGCATAATTTTCAGAGATG	up	1.34111	0.713531	up	1.34832	0.728667
AM065278	AM065278 Chicken immune 2 - CSEQRBN29 Gallus gallus cDNA clone C0000463N14_T7, mRNA sequence [AM065278]	A_87_P035394	TGGGTGGTGGCTGCATTTTGGCACCTTGAGGTGCAGAGCTGCCCAACCCCTTCTTCTTTT	up	1.3409	0.62276	up	1.41487	0.579625
BX936161	Gallus gallus finished cDNA, clone ChEST13c1. [BX936161]	A_87_P021779	AAACCAAAGAAGGGCGAAGGAAAGAGAGCTCTCAAGAAGAAATAGTGCCCCTTGGACAAT	up	1.34063	0.0211276	up	1.12825	0.232032
AF375474	Gallus gallus small nucleolar RNA M3, complete sequence and RPSA gene, intron 3 [AF375474]	A_87_P037653	GCTAATGCCAGGAGAGGAGCTGCCTCTATGATTGGAGTTTGATAGCAGCCCTCCGACATG	up	1.34046	0.521298	up	1.31613	0.613321
PARVA	Gallus gallus finished cDNA, clone ChEST626f13. [CR390783]	A_87_P013933	TCCTTTGCATTTGAGCTAATGCAAGATGGTGGATTGGAAAAACCAAAGCCCAGACCAGAA	up	1.34043	0.00953885	up	1.19587	0.309813
PRTG	Gallus gallus mRNA for Protogenin, complete cds. [AB185923]	A_87_P038059	TCATGAAAATGTGGAGCAAACTGACAGGGTATCATGTTTTATTTCTTAATGGGGGTGGGA	up	1.34011	0.555333	up	1.25795	0.680413
CHCHD6	Gallus gallus finished cDNA, clone ChEST799p17. [BX931932]	A_87_P023731	CCCTTCATGGTCCAAGACAACGATGATTCCTCTTCTAATGGCCTGCATGTATTGGTCTAT	up	1.33989	0.0326463	up	1.41525	0.0244043
RCJMB04_6a20	Gallus gallus mRNA for hypothetical protein, clone 6a20. [AJ851543]	A_87_P035698	ACTGGTCCAATTGAGCTGATCTCCACGTTTGGTGTATTAAGAAGCAGCCATTAGAATCAA	up	1.33962	0.0168753	up	1.41278	0.0310615
BBX	Gallus gallus finished cDNA, clone ChEST1016e2. [CR524052]	A_87_P011180	ATTAATGAACAGGAATGGAATGATCCCAGAGCTTGCTTTCTATTGAAGGCTTTTAAACAG	up	1.33914	0.0475102	up	1.12582	0.58462
UBB	Chicken ubiquitin mRNA 3'-region expressed during spermiogenesis. [X06580]	A_87_P008970	CTTGCTTCCAAGAAAAAGTTCCTCTGCACATGTTCATTCCAATAAAGTTCTTGCATCCAC	up	1.33914	0.0554319	up	1.02058	0.850334
CDC5L	Gallus gallus finished cDNA, clone ChEST879l23. [CR405819]	A_87_P013186	AAGAGAGCGCAAAAAGGACAAACAACACATGAAACGAAAGAAAGAATCAGACTTGCCTTC	up	1.33884	0.126058	up	1.15142	0.570167
NEO1	Gallus gallus neogenin mRNA, partial cds. [U07644]	A_87_P009160	TGCCTTTTCAGTGTTGGACATTCGCATTTATGTACAATTTTGTGTTTTTATTTTATCTTT	up	1.3387	0.052427	up	1.23156	0.143976
LOC419406	Gallus gallus finished cDNA, clone ChEST631g4. [CR390730]	A_87_P013964	ATTCCTTGGCTATAAAACCACCACAGCAAATGTCACGGAAAGAAAAAACCCATCATAGAA	up	1.33827	0.174107	up	1.26926	0.267424
CN217063	RJA004E12.ab1 RJbrain Gallus gallus cDNA 5', mRNA sequence [CN217063]	A_87_P020867	TGTTGCGAGACAGCGTCACAAGCTCCTTGTGCTCCCCGCGACTCGTTTTTGCAGGCAATT	up	1.33795	0.356171	up	1.36008	0.449249
AI982128	pat.pk0074.h5.f chicken activated T cell cDNA Gallus gallus cDNA clone pat.pk0074.h5.f 5' similar to diacylglycerol kinase alpha, mRNA sequence [AI982128]	A_87_P037545	CGTCTGCGTTAACGATGTCTCCTGCTACTTCTCACTGCTGGAGGGTGGACGCCCTGAGGA	up	1.3379	0.825134	up	1.99741	0.518708
NAPRT1	Gallus gallus finished cDNA, clone ChEST73a11. [CR406774]	A_87_P012542	AGCAGGAACGCGTGGAAGTTTTAAATCAAATACCATCCAGAAACGTTGCACGGACTGGAT	up	1.33788	0.0188107	up	1.13925	0.224217
BARX2	Gallus gallus homeodomain transcription factor BARX2B (BARX2B) mRNA, complete cds. [AF102555]	A_87_P037896	GCAGAGCCCTCCTCAGAGGAGGTTACGCCATTAAGTTAAAAGGGAAAAAGAGAAGGGAAA	up	1.33781	0.197265	up	1.19244	0.410939
PLEKHC1	Gallus gallus finished cDNA, clone ChEST262l9. [CR391344]	A_87_P013529	CTTAACTCTAGTATGCCTGTAAGAAATAAGGGGATTAACCCAGGGAAAACAAAAATACGG	up	1.33762	0.0106966	up	1.27037	0.0879379
SNX30	Gallus gallus finished cDNA, clone ChEST467g14. [BX932121]	A_87_P023640	GTGTTGAAGAAGAGAGACCAAGTTCAAGCAGAGTATGAAGCAAAACTGGAAGCAGTAGCC	up	1.33757	0.026067	up	1.1897	0.233115
AQP5	Gallus gallus partial aqp2 gene for putative aquaporin. [AJ250343]	A_87_P037489	TGCTTCCACTGATGAACGCAGGGAGGACAAGCTGGGGTCTCCTGCACTGTCCATTGGCCT	up	1.33752	0.561453	up	1.27495	0.699044
TC226963	Q08514 (Q08514) Gallus gallus POL-like (Fragment), partial (8%) [TC226963]	A_87_P000342	TAGGAAGGATTGTCTCATTTCCTTTCATAAAAGTGAGCTGAGTGAATAACCCTTATGTAC	up	1.33744	0.414079	up	2.07667	0.0884907
CO504050	GGEZCB1006G03.g chicken breast muscle - CB1 Gallus gallus cDNA clone GGEZCB1006G03, mRNA sequence [CO504050]	A_87_P020275	GCAGCCCCCTCAACGTGGTGGACCTCATCGTGGACATCATGTTCATCATCGACATCCTCA	up	1.33721	0.261094	up	1.20207	0.525603
NEK1	Gallus gallus finished cDNA, clone ChEST183o10. [CR389411]	A_87_P014836	CCTTTCCAACTCCAAAGAAGAAAATTATTCCAGGAGAAGAAAGGAGGAAAATGTTGGAGG	up	1.33703	0.4864	up	1.20169	0.715851
KERA	Gallus gallus keratan sulfate proteoglycan mRNA, complete cds. [AF022890]	A_87_P038008	AGTATTTAGCTATCTGCTGACTCATACAGATACACATAACTCTGGACACTAGAGATGTCC	up	1.33703	0.203755	up	1.49065	0.0848557
AJ719539	Gallus gallus mRNA for hypothetical protein, clone 3d5. [AJ719539]	A_87_P037025	CACACTCAACCTGCAGCTGATGCGTTTCGTGTTTGACAGACAAACTGGCCATAAGAAAAA	up	1.33682	0.227279	up	1.47142	0.125592
BI390261	pgp1c.pk003.l5 Primary Chicken Pituitary [BI390261]	A_87_P034927	CGAGAAGTCATCATTTCAAAAACATCCAGCTCCCCCCTGTGCTTTGGGATGTGAAAGAAT	up	1.33643	0.432577	up	1.23247	0.64459
TRAF3IP2	Gallus gallus finished cDNA, clone ChEST738b22. [CR390935]	A_87_P013838	TGCCTTGTACAGCATTATCAGACAGTTAATTCGTACATGCACTATTAAATATGTTTGCCT	up	1.33633	0.010201	up	1.1933	0.184837
CNTN1	Chicken mRNA for contactin. [Y00813]	A_87_P008763	TTTGAAAGAGAAATGATCTGTCTTCATACATGAGAAACTAATATGCTGTAAGCCCTTCTG	up	1.33615	0.104002	up	1.40309	0.0930963
CD218517	pgr1n.pk007.c3 Normalized chicken reproductive tract cDNA library (pgr1n) Gallus gallus cDNA clone pgr1n.pk007.c3 5' similar to ref [CD218517]	A_87_P021353	TGCCGCCATGGCCAAGAAAGCTCTGGTGGAAGGGAATGTGGGCCTCTTCAAGAAGAAGGT	up	1.33606	0.519449	down	1.35054	0.850776
LOC415661	Gallus gallus finished cDNA, clone ChEST34l5. [BX933022]	A_87_P023238	CAGCACTGCCGGATCCATTCAGGACCTCTACCTGTGGCAGTATGGACAAGCGCTCTCATA	up	1.33592	0.0325543	up	1.24744	0.107795
CLN6	Gallus gallus finished cDNA, clone ChEST383d13. [BX934648]	A_87_P022489	ATATACTTCACCGGCTGCTTCACACCCAACGAGGATGAGAGCAGGATGCCAATGTCTGCG	up	1.33578	0.0161847	up	1.27757	0.0163553
BQ484489	pmp1c.pk005.d3 Chicken Macrophage cDNA library Gallus gallus cDNA clone pmp1c.pk005.d3 5', mRNA sequence [BQ484489]	A_87_P034811	AGCGAAGACCTGAATCCTGCAATGTTCAAAGGAACTCCTTTTTGTACAACAAATAACCCA	up	1.33577	0.0397297	up	1.02132	0.874482
ALDH9A1	Gallus gallus finished cDNA, clone ChEST267f17. [BX934135]	A_87_P022731	TTTCCAGATTGCTTGTTGGAAGTCTGCCCCAGCCCTGGCATGCGGCAACGCTATGGTCTT	up	1.33574	0.0326601	up	1.26747	0.132847
ST3GAL3	Gallus gallus partial mRNA for alpha 2,3-sialyltransferase ST3Gal III (siat6 gene). [AJ865086]	A_87_P035515	ACTGCACTACTATGAGAACATCAAGATGTCTGCCATCAAAGAGTCCTGGACGCACAACAT	up	1.33573	0.60755	up	1.65449	0.370717
PCDHGA5	Gallus gallus gammaA-like protocadherin precursor, mRNA, complete cds. [AY325274]	A_87_P035202	GCACGAGGCTCTCGCTCAGCTTCGTCCAGTGTAAATAATTGTAACACCCATCTGTTAATT	up	1.33532	0.0247418	up	1.21165	0.119023
BX934150	Gallus gallus finished cDNA, clone ChEST268j1. [BX934150]	A_87_P022722	GCAAAAAGGACATAGAAAACCCAGAGATCATAGTGAAAGCTACTGTGTTATAAAGGCTGT	up	1.33521	0.0228407	up	1.30465	0.0818126
LECT1	Gallus gallus chondromodulin-I mRNA, complete cds. [AF138280]	A_87_P037868	GAGGTTTTTGCTCTTTTGAAAGCAAATGACCTTGATCATTATGTTGTTTTAGAAGTACGC	up	1.33478	0.329032	up	1.35715	0.325916
SIPA1L2	Gallus gallus finished cDNA, clone ChEST781a1. [CR407438]	A_87_P012070	GTCGAGACAGGGAGAAATCTTTCAAGAGGAGACTAAAATCAGAAACGGTAGAAACATCTC	up	1.33439	0.170487	up	1.37738	0.10099
RCJMB04_3e13	Gallus gallus finished cDNA, clone ChEST654g5. [CR391408]	A_87_P013479	CTGCTCTTCACCCTTTCCTACCCTGAGAGTGCTGAAAAACCAGTCAAAGACTATGAGTTT	up	1.33425	0.588654	up	1.33287	0.628405
LOC421233	Gallus gallus finished cDNA, clone ChEST229o17. [CR386425]	A_87_P016484	CTTCATTTTCTTACAAAGTTGTGACTGCATCACACGGTATCTCTTTAGGAAAGCGTACGC	up	1.33423	0.183671	up	1.17995	0.441311
UGDH	Gallus gallus mRNA for hypothetical protein, clone 7d7. [AJ851561]	A_87_P035688	TTGGGTTTGTGTCTATGGGATATTACAGAACGTGATTCTTGATGAGAATTGTGTAATATG	up	1.33421	0.00283827	up	1.23174	0.0985149
FABP7	G.gallus mRNA for cl. 453 fatty acid- or lipid-binding protein. [X65459]	A_87_P008868	GCCATCAAATTGGCAAGCTTTTGCTGTATATTGCAACAAGTCAAAGTTTGCATAAAAACT	up	1.33416	0.270295	up	1.54788	0.121586
TC223460	I50209 reverse transcriptase VTGIII, pol-like - chicken (fragment) {Gallus gallus;} , partial (12%) [TC223460]	A_87_P001949	ACTTCCATTGGCAGCCTAATTCAGTGCTTAACAGAAGAGAGCAGCACTCATCCTAGTACA	up	1.33405	0.704868	down	1.08698	0.926294
RPLP1	Chicken mRNA for acidic ribosomal protein P1. [X13876]	A_87_P008956	GGGCTTTGGTCTTTTTGACTAAATAGTTTGTACCTGCCTGTAATAAAGAACATTTAACTG	up	1.33384	0.0581302	up	1.17426	0.27377
CR354109	Gallus gallus finished cDNA, clone ChEST91o19. [CR354109]	A_87_P017540	CACCCTGGCAGACAAAGATGGGGAGATCTACTGCAAAGGTTGCTACGCCAAGAACTTCGG	up	1.33374	0.00586452	up	1.16515	0.268544
GMCSF	Gallus gallus mRNA for granulocyte-macrophage colony-stimulating factor (GMCSF gene). [AJ621253]	A_87_P037222	TCGAGGGAAAAATTCAAAGAGGCATTAAAAACTTTCTTTATTTACCTCTCTGATGTGCTC	up	1.33353	0.722547	up	1.3396	0.733448
LOC423228	Gallus gallus finished cDNA, clone ChEST146o9. [CR387494]	A_87_P015781	TCAACATCCCTCTCCCTTCTGACTTTTACTGAAGATTGGGCCTGTTATTAAGTGGCCACA	up	1.3333	0.276435	up	1.40848	0.220597
CN222792	WLA043C06.ab1 WLbrain Gallus gallus cDNA 5', mRNA sequence [CN222792]	A_87_P020798	AGAACCATCCTGGATGACAACAGCTCCTCGGCCCTCATCATCCTGGGCTTCGTCATCATG	up	1.33313	0.523751	up	1.01796	0.975557
KCNG4	Gallus gallus Shab-like voltage-gated potassium channel cKv6.3 (cKv6.3) mRNA, partial cds. [U62140]	A_87_P009045	ACGAATCCGGCAAGGTGCTTGAATTCACGAGCATACCTGCCTCTTACTGGTGGGCTATCA	up	1.33266	0.701647	down	1.43761	0.521315
SUHW4	Gallus gallus finished cDNA, clone ChEST428b3. [CR352765]	A_87_P018382	CACAAGCACATCCACGTTTCAGTTATCACCTAAAGCGAAGAATACGACTGCTAGAAATCA	up	1.33243	0.0205976	up	1.12477	0.357734
HOXB4	Chicken chox-z gene for Chox-Z deformed (Dfd) family homeobox protein. [X17612]	A_87_P008941	GTCTGTTGGGGAAAAAGCACCCGGAGTTCGACCAGAATCTTCAGGGGAAATAATAATACT	up	1.33233	0.170418	up	1.34687	0.196296
TNFSF5IP1	Gallus gallus finished cDNA, clone ChEST564h16. [BX950555]	A_87_P021581	TCCTCCCGTGAAAAGGTGATTATAAACTAATTGCCGAGCAACAGCAGCTGATTCATTATG	up	1.33185	0.00238559	up	1.25026	0.040171
BI390295	pgp1c.pk003.n6 Primary Chicken Pituitary [BI390295]	A_87_P034925	CGGCATCGAGTTTGATTGGCGGCACGTGCAGATGGGGCTGGACTCCAACATCAGCCTGGT	up	1.33156	0.17021	down	2.24956	0.593393
RCJMB04_29f20	Gallus gallus mRNA for hypothetical protein, clone 29f20. [AJ720899]	A_87_P036092	GTCTACAATTCTGTCCAGAAAAGATTTTCGAGAGATTCAATTTCACAGTAACTTTCTCAG	up	1.33097	0.0531278	up	1.33655	0.133539
AJ719925	Gallus gallus mRNA for hypothetical protein, clone 8f5. [AJ719925]	A_87_P036763	ATAGATGGCCTTTTGTTCTAGGAGATGTTTAACATGGTAACTCCCTAGGCATTTCTACAA	up	1.33092	0.623344	up	1.29666	0.682192
LCAT	G.gallus mRNA for lecithin-cholesterol acyltransferase. [X91011]	A_87_P008795	AGGCAACAAGCTGAGCCCCTGCTGCAAGACTGGCTTAGAATTAGCAGATCTAATAAACAT	up	1.33048	0.55743	up	1.40763	0.481887
AJ720529	Gallus gallus mRNA for hypothetical protein, clone 19k4. [AJ720529]	A_87_P036348	GTGAGCTGATAGCACATTAGTGTGAGCATGATTCTTCCTTATGAGGAAGATGCTCAGTGG	up	1.33042	0.133308	up	1.25735	0.110961
BX930347	Gallus gallus finished cDNA, clone ChEST1024o6. [BX930347]	A_87_P024347	CCTGATGAAAAACTTGAAGCCCATGTTGCTGGAAGTAAATGCAAACCCCAGCATGAGAAT	up	1.33004	0.0456562	up	1.08168	0.435817
BM491537	pgp2n.pk006.l12 Normalized Chicken Pituitary [BM491537]	A_87_P034837	ACATTTTTCACGTGGATCCAGATGTCTAGATCCCTTACTGTGACTTGTTTGTTAAAACTG	up	1.32963	0.0925372	up	1.15624	0.469392
PHB	Gallus gallus finished cDNA, clone ChEST77k24. [CR387706]	A_87_P015625	GGAATTCACTGAAGCAGTTGAAATGAAGCAAGTGGCCCAGCAAGAAGCAGAGCGAGCCAG	up	1.32945	0.157448	up	1.10057	0.58791
LMO4	Gallus gallus LIM domain only 4 protein mRNA, complete cds. [AF532926]	A_87_P037569	AATATGAACATTAAGGACTCCATGAACCTGGGCTAATGGGAGACTGTAGAGAAAATGAAA	up	1.32914	0.197247	up	1.62247	0.0644024
CR353955	Gallus gallus finished cDNA, clone ChEST354h3. [CR353955]	A_87_P017629	AAACTTCTGTGGATGCCTCTGGAGAGTTGTCTTCAGGTCTCAGTATTGCTTGCAGGTATT	up	1.32914	0.0277443	up	1.29665	0.0916077
MIB2	Gallus gallus mRNA for hypothetical protein, clone 25j24. [AJ720785]	A_87_P036179	GAACACTGATTGGAGAAAATATGTTGTTACAACAAAAACTTCTCTAAGTGACACTCTTCC	up	1.32914	0.287277	up	1.02991	0.929856
BX932139	Gallus gallus finished cDNA, clone ChEST470h3. [BX932139]	A_87_P023628	AAGCAGCTAAATAATGGAAAGCTCCCTACAAGTACAGCTCCTGGCACCTTGTTTCCAAGT	up	1.3284	0.580581	up	1.17997	0.729557
CR390879	Gallus gallus finished cDNA, clone ChEST973f16. [CR390879]	A_87_P013873	TGGTGAAGACTCAGGATAAAAAGCCTCAGACGTATGAAAGGCCCCGCATATGTTTGCAAA	up	1.32805	0.707917	up	1.24146	0.786996
LOC395906	Gallus gallus mRNA for desmin, partial cds. [AB011672]	A_87_P038205	GGCTCCGAGGTGCACACCAAGAAGACAGTGATGATCAAAACCATCGAAACTCGTGATGGA	up	1.3278	0.0563514	up	1.17575	0.113788
USP38	Gallus gallus finished cDNA, clone ChEST608n8. [BX934510]	A_87_P022564	GGCACTTTTCATGGCTACTGATTTCAGAAGACATGTTTTATCTCTGAATCTAAATGGTTG	up	1.32753	0.411258	down	1.04147	0.948007
KCNJ3	Gallus gallus GIRK1 mRNA, complete cds. [L35555]	A_87_P009471	CTCCAGAAACTGTCGGGTGGCGGCCGGATGGAAGGGAACCTTCCTCCAAAACTGAGAAAA	up	1.32731	0.178714	up	1.42598	0.1579
CV859573	gonad_EST07049 Embryonic gonad cDNA Library Gallus gallus cDNA 5', mRNA sequence [CV859573]	A_87_P010392	TTCTTAATGGGCATAATTTGTTGGTATAATATAAAAAGATTGGAAAGTGCATGCCCCTGG	up	1.32723	0.311232	up	1.38707	0.277885
SETD2	Gallus gallus finished cDNA, clone ChEST197k19. [BX933388]	A_87_P023051	ACACACCGCTCAACACACCGGAGCTGTCTGCCAAGCAGAGTGCTGAAGGAGACACAGATA	up	1.32703	0.338838	up	1.08945	0.799639
MYH10	Chicken nonmuscle myosin heavy chain (including B1 and B2 inserts) mRNA, complete cds. [M93676]	A_87_P009276	AAACAAGCATACAACACAGGCACAGTAATTTATTAACTTCAGGCTGAGCGCTCTTCGGGA	up	1.32687	0.0296121	up	1.20186	0.0529364
OLIG3	Gallus gallus bHLH transcription factor Olig2 (Olig2) mRNA, complete cds. [AF411041]	A_87_P037632	CGGGCTCGGCCCCGCAGTAACACTTTTCTTATCGCCTCCCCACTGCAGAGATTTTATCGT	up	1.32674	0.216659	up	1.20401	0.415907
RCJMB04_34i5	Gallus gallus mRNA for hypothetical protein, clone 34i5. [AJ721080]	A_87_P035955	AGAGGCTTACCACCATGCTGTCTGTGCTCATTAATCACTGCCTTGTCAACTAAGATGAAT	up	1.3265	0.0211402	up	1.25645	0.0150884
TMEM16E	Gallus gallus finished cDNA, clone ChEST304h6. [CR354301]	A_87_P017409	TGTTCCTGAGAGAAACAAGCCTAAACAGAATCCAGAAGGTTTGAACAATGCAGGTACAGA	up	1.32644	0.210049	up	1.3427	0.187934
HSPE1	Gallus gallus heat shock protein 10 mRNA, complete cds. [AF031309]	A_87_P037992	GGGCTTCTACCATTGCAAAAATAGGTCTCTACAAGTGCTATTCTGTCTGCACTGCCAGTA	up	1.32636	0.700411	up	1.43894	0.632758
BCAR3	Gallus gallus finished cDNA, clone ChEST585a11. [BX930194]	A_87_P024401	CAGTCGGAGAGCTATCTGCTGATAGGTTCAAGACATTCATCTCGATTACCTGAAGCAGAT	up	1.32622	0.739567	down	1.02146	0.973239
CO772032	testis_EST03129 Testis cDNA Library Gallus gallus cDNA 3', mRNA sequence [CO772032]	A_87_P019145	AACATAATATGTAAGGATTCTGGCACAAATCATGAGAAAGCTCCCAGCCCCAACAACCCA	up	1.32607	0.465701	up	1.1902	0.702483
FGB	Gallus gallus fibrinogen beta chain mRNA, partial cds. [M58514]	A_87_P009334	CACTCTTTAACAAAGAAGTTGCATACCAAATCTGAAGAGGGAATGGATTACTGTAAAATG	up	1.32602	0.298049	up	1.6535	0.101555
LOC423159	Gallus gallus finished cDNA, clone ChEST44c9. [CR387267]	A_87_P015933	GATTGGCCTGGGCCCCAAGTCATGGGAGTTTACAACTCTACTAAACTTCTGTCTTGTTTT	up	1.32599	0.169691	up	1.40001	0.116814
EXOC1	Gallus gallus finished cDNA, clone ChEST570j23. [CR406271]	A_87_P012899	AAGCCTTTGCAGAGAAGTTGTCTAGAGAGCTGCAAGTTCTAGATGGGGCAAATATCCAGT	up	1.32569	0.562094	up	1.14069	0.808048
FER	Gallus gallus finished cDNA, clone ChEST954k15. [BX935259]	A_87_P022196	CAGCACCAATATTATGACACTACGCTTCCTCTGTTACTTGATTCGCTACAGAAAATGCAA	up	1.3256	0.0900139	up	1.3087	0.2348
ATP5S	Gallus gallus finished cDNA, clone ChEST1032g4. [BX932166]	A_87_P023614	CAGATAAAGGCATCATTGCACTTCACAAGCTGACGAACCTTGAATATTTGTATCTGAGTG	up	1.32551	0.0399192	up	1.16311	0.280527
CR523482	Gallus gallus finished cDNA, clone ChEST984o7. [CR523482]	A_87_P011578	GTTCAACTTGAAGGATGTGCGTAAACGTGTTAAAACCATTTATACTCCTTCTCCTCTATT	up	1.32547	0.210939	up	1.20191	0.51033
RCJMB04_25m4	Gallus gallus mRNA for hypothetical protein, clone 25m4. [AJ720792]	A_87_P036173	CTAGCTTAAAACAGTTATCCTCTGGCTAGGAATCTAGACCCTGGATTTAATTTCAGTAGA	up	1.32544	0.00505998	up	1.32518	0.0269862
CV861024	gonad_EST08500 Embryonic gonad cDNA Library Gallus gallus cDNA 5', mRNA sequence [CV861024]	A_87_P010135	GCAGCCTGAGGTTTGACAGGTTTGTCATTAGCAGTCACTAAAACAAAACAGCCAACCCAA	up	1.32496	0.0615081	up	1.21561	0.258153
CN227673	RJB094C07.ab1 RJtestis Gallus gallus cDNA 5', mRNA sequence [CN227673]	A_87_P020711	GGCTACGAGCCAAGTGGTACAGTGCCAGCATGTGGAGCTGGTCACCAAGACGAGGACGGA	up	1.32397	0.530576	up	1.35876	0.520805
LOC417154	Gallus gallus finished cDNA, clone ChEST727j13. [CR523822]	A_87_P011343	ATTCTATGTTCTCTTTAGTTACCACAACAGTGAGACTAATAGCAATACTTAAGAGCTTGC	up	1.32388	0.220473	up	1.38092	0.157048
GKAP1	Gallus gallus finished cDNA, clone ChEST608f1. [BX934479]	A_87_P022575	GCAAACTGGAATATGAAGAGCACAAAAAGGAATATGAAAACATGGAATGTATTCCACCTC	up	1.32369	0.0587581	up	1.28541	0.0881315
CD215505	pgp2n.pk008.a12 Normalized chicken pituitary [CD215505]	A_87_P021386	CCCATAGCGGCCCCATAGTGACCCCATGGCTGCGCTATTGTGGCCCCATAGTAGTCCCAT	up	1.3236	0.0382565	up	1.28895	0.121734
CR389589	Gallus gallus finished cDNA, clone ChEST861h18. [CR389589]	A_87_P014725	ATTCGTTGCTCTGTTAGTTTCAAATGGACGCTTGGCTGCAGATTCGTTTCGATTTCTGAA	up	1.32346	0.591114	up	1.16635	0.800686
LOC417532	Gallus gallus finished cDNA, clone ChEST751b15. [CR390995]	A_87_P013795	TCCTGCAGCCTCCCCCTGCACAGCCCATGCAGGAGCATCGGTTGGATGGCAATGTCTTCA	up	1.32328	0.248679	up	1.3119	0.229141
LR11	G.gallus mRNA for mosaic protein LR11. [Y08109]	A_87_P008756	TCCCGGTATTACCAGTTCCAGTGTGGGAATGGGCACTGCATCCCCAACCAGTGGAAGTGT	up	1.32326	0.225745	up	1.1652	0.522166
MKRN2	Gallus gallus makorin-2 (MKRN2) mRNA, complete cds. [AF439559]	A_87_P037619	CTGTATCTGTTTAGGGTGCTTATTTCCCCCTAAATTAACTAAATGTATATCTGCAGAAAC	up	1.32312	0.173591	up	1.31233	0.266248
X01775	Chicken 7S RNA sequence. [X01775]	A_87_P008982	CTAATCATAATCGAAACAACCAGCCTACTTATTCGGCCATTAGCCCTAGGAGTACGCCTA	up	1.32285	0.0516072	down	1.02439	0.87299
SEH1L	Gallus gallus finished cDNA, clone ChEST682a4. [CR391317]	A_87_P013548	AGACTTATCAATGCAACGTTGGATGTTCTTCCTGTTAAAGGGCCTCAGGGTCCTCCATTA	up	1.32225	0.37437	up	1.12533	0.680413
SAT	Gallus gallus spermidine/spermine N1-acetyltransferase (SSAT) mRNA, complete cds. [AF402003]	A_87_P037641	TATGAAAACTTCATTCTTGTAAGTGTCATTCAAATGTGTACAATGTACACACTGGTAGGG	up	1.32174	0.0157319	up	1.44358	0.010582
B4GALT7	Gallus gallus mRNA for beta1,4-galactosyltransferase 7 (B4GAL-T7 gene). [AM231262]	A_87_P035334	CATTGCTGCGCAGAAGCAGGAGCAGTTTAAGGTGGATCGGGAGGGAGGTCTGAACAACGT	up	1.32169	0.00347305	up	1.30241	0.0208148
TC205519	B57484 cell division control protein CDC37 homolog splice form 2 - chicken (fragment) {Gallus gallus;} , partial (51%) [TC205519]	A_87_P004919	ATAATTCTAAGGCACGTCCTTCCCTGTTCTGGTGCCTCAGTGCACGAGTTGCCGGACACC	up	1.32164	0.527172	up	1.14983	0.76009
OTOA	Gallus gallus mRNA for hypothetical protein, clone 8l23. [AJ719955]	A_87_P036743	ATTCAGTGTATGGTTTCAATATGGAATAATTCCAAAAGTGAGATTTTTGTGAGATTGTTT	up	1.32146	0.00940113	up	1.16705	0.223989
UBXD2	Gallus gallus finished cDNA, clone ChEST990k7. [BX934963]	A_87_P022336	CCTGCGAATGATCTTGCACTCAAAGTAGAAAGAATCACAAAAAAGCTTGAAGAAAGACGA	up	1.32136	0.153272	up	1.07203	0.757658
CR733397	Gallus gallus finished cDNA, clone ChEST718g11. [CR733397]	A_87_P010733	AAGAGGTTCACTAGGTTCAAAAGGCAAACTAGGTCCTCCTGGCTTGGGTATCCCAGGAAT	up	1.32119	0.0683631	up	1.29796	0.141886
LOC422350	Gallus gallus finished cDNA, clone ChEST1014j6. [CR338723]	A_87_P018886	CCAAGCTCATGCCCGCAGTTGATTTTGAAGAGCTACTCCAGTAATACATTTTTTATGTGA	up	1.32118	0.308677	up	1.42744	0.323939
BX935407	Gallus gallus finished cDNA, clone ChEST502b14. [BX935407]	A_87_P022158	TCCAACAGAACAGCCATCATCAGGAAAGCCTAAAAGTAGAGTTCTTCAGCACCAGGAGAA	up	1.32118	0.083352	up	1.03051	0.83042
CR405824	Gallus gallus finished cDNA, clone ChEST879l21. [CR405824]	A_87_P013183	TTGGAAACAGACATCTGTTACATGTACCTTTTCCTAAGATTGTGAGAATAAAGAGGAGAA	up	1.32117	0.252431	up	1.22214	0.451579
CD4	Gallus gallus breed Leghorn CD4 precursor (CD4) mRNA, complete cds. [AY528652]	A_87_P035148	GAAACGGGCAAGAAGGATGGCACAAGCAAAACAATACTTGCTGGAAAAGAAGACATGTCA	up	1.32108	0.533599	up	1.38528	0.526578
SLC39A12	Gallus gallus finished cDNA, clone ChEST719l14. [BX950788]	A_87_P021457	CTTGGCTGCTTTGATTATTACTTTGGCTCTCCAAGGAGTCTGCATGGGAAAAGCAAGCTT	up	1.32104	0.672454	down	2.18115	0.471785
RCJMB04_12m12	Gallus gallus mRNA for hypothetical protein, clone 31p4. [AJ720988]	A_87_P036024	CAACTGTTTCTTATGTGTCCCCATAAATCCAGTGTGTGCCATAATGGGCACTGTGGGTTA	up	1.3207	0.0331802	up	1.26798	0.0404471
CR405937	Gallus gallus finished cDNA, clone ChEST698n20. [CR405937]	A_87_P013101	ATGGAAGATACGATACAGCTCAACTTCGTTTTCAAAACAGGTCATTGCTTGTCAGAAAAT	up	1.32042	0.247136	up	1.47108	0.145978
ELAVL4	Gallus gallus RNA-binding protein HuD (HuD) mRNA, complete cds. [AF176675]	A_87_P037827	GATGAGTTACAAGATGGTTTTTCTTTAAGTCATCAGTATGGGATATCAGCAGAACAAAAG	up	1.32014	0.0548976	up	1.1057	0.435197
GLT25D2	Gallus gallus finished cDNA, clone ChEST462a11. [CR385470]	A_87_P017120	ACCCGCCCCACCAGGACTACACCTGGAGCTTTGATGATATCATGGTCTTTGCCTTCTCCA	up	1.32002	0.052427	up	1.3463	0.121734
GCN5L2	Gallus gallus mRNA for GCN5, complete cds. [AB052158]	A_87_P038144	TGGATTGGTTTTCTTTCTTTTATTATTTTTTATTTTTTAATTAAATGTACTTGTGCAAAA	up	1.31998	0.123284	up	1.26083	0.217919
RCJMB04_1n17	Gallus gallus mRNA for hypothetical protein, clone 1n17. [AJ719390]	A_87_P037121	AGTTCTACGGGTGTTTTTTGAACCCTTTACGAAAATGTTGGAACCCCACTTTGTGTCATT	up	1.3199	0.464722	up	1.28766	0.482557
CHRNA2	Gallus gallus mRNA for nicotinic acetylcholine receptor, alpha-2 subunit (nachra2 gene). [AJ250360]	A_87_P037487	AACCGTGGGGCTCTTTCTCCCACCCTACCTGGCAGGGATGATTTAGGGATCAAGGGTGAT	up	1.31957	0.439129	up	1.4466	0.276091
BM487094	pgm2n.pk003.i24 Normalized Chicken Breast Muscle, Leg Muscle, and Epiphyseal Growth Plate cDNA library (pgm2n) Gallus gallus cDNA clone pgm2n.pk003.i24 5' similar to ref [BM487094]	A_87_P034854	AGCAGTTTGTGCAGGCGGTGTCCACTGTATGGGAGCACGACGACGTCCACATCATCAACA	up	1.31943	0.571453	up	1.07631	0.912035
CR352396	Gallus gallus finished cDNA, clone ChEST83o1. [CR352396]	A_87_P018623	CAAGCTTGTGGATTTCGTGATCCATTTCATGGAACGAGATCGACAAGGAGATCAGTGAGA	up	1.31926	0.112608	up	1.24565	0.025838
TC203387	Q08515 (Q08515) Gallus gallus POL-like (Fragment), partial (14%) [TC203387]	A_87_P005784	TCCATTCATGAAAATTGATCCTCTGTACAGACAATTCCTTGGCTACATTCATCACTGTGG	up	1.31917	0.126275	up	1.2303	0.136145
GLI	Gallus gallus GLI mRNA, partial cds. [U60762]	A_87_P009050	CATTGACAAACTGAAGCAGATGAGGAAGCCATCAACCAAGGGCCTGAACCTGCCAGCCAT	up	1.31891	0.788218	up	1.37095	0.769792
SLC4A1AP	Gallus gallus finished cDNA, clone ChEST36m12. [CR386939]	A_87_P016150	CAGAGGTTCTCCATTCAGGAAAGAAGAAAGAAGCAATGATCCAGTGTGCACTGGAAGCTT	up	1.31886	0.0180154	up	1.20915	0.0930963
LOC426117	Gallus gallus cyclin E mRNA, complete cds. [U28981]	A_87_P009106	GTCAGTGTCTGGATCGTTGTATTTAATAGCAAGAAGCAATGGGGAAAGAAGGTTGCCTTT	up	1.31857	0.0341999	up	1.13173	0.337522
LOC422417	Gallus gallus finished cDNA, clone ChEST1036j20. [CR386079]	A_87_P016715	AACAGTAATGCCAGTTGACCATCCTCCTATAAAGGCCTTCTCTGAGAAGCGTACTTCACA	up	1.31852	0.105151	up	1.1384	0.433065
BX935209	Gallus gallus finished cDNA, clone ChEST864n12. [BX935209]	A_87_P022213	GTTAAGGAAGGTTATGAACAAGTGGCAGCTATTAGAAGAGTTCTAGAAGCTGGAAAGGCA	up	1.3183	0.275561	up	1.25487	0.425086
LOC415656	Gallus gallus finished cDNA, clone ChEST845p3. [BX933156]	A_87_P023172	AGCACTTTCTCCGGATGGAACTGTGTTGGCCACAGCAAGTCATGATGGTTTTGTCAAATT	up	1.31828	0.38564	up	1.02002	0.95284
LDB2	Gallus gallus LIM domain binding protein CLIM-1 (Clim-1) mRNA, complete cds. [AF069990]	A_87_P037945	CCCACTGCCATGTGTGTCAGGGGGTTATTAATTACTGTTTCAGAGCATCCTTCGAAACAA	up	1.31818	0.0479305	up	1.19256	0.206529
CAPZB	WLA009G05full WLbrain Gallus gallus cDNA 5' and 3' similar to Actin-capping protein beta chain, splice form 2, mRNA sequence [CN210823]	A_87_P020875	GAGGCCTACTTTGCACCACATTTTACTATTGAGACCTTAGGCTATGTTTCTGTAGAAGTC	up	1.3179	0.0554589	up	1.21884	0.243427
AKR1B10	Gallus gallus finished cDNA, clone ChEST110k9. [BX934125]	A_87_P022736	ATTTCTAAGTACAGCAGTTGCTACATGAGTAGCTCTTTGAAAAGTGTAAAGGTCCTGTTT	up	1.31757	0.00542139	up	1.30464	0.0386004
LOC424984	Gallus gallus finished cDNA, clone ChEST984i23. [CR338913]	A_87_P018750	GCATGATTGCTACTGATGAACAGTTTGCAGCCCTCATTGTACTTGGCTTTGCAAGTTTGT	up	1.31751	0.109903	up	1.06179	0.784061
PLOD2	Gallus gallus finished cDNA, clone ChEST931d7. [CR406861]	A_87_P012477	TTGGTTCCTTACGTAAACAATTATTTATAGTTTCCTTCTGGAAGATGGTGATACACGAAG	up	1.31749	0.0252351	up	1.19349	0.134932
AJ719518	Gallus gallus mRNA for hypothetical protein, clone 2p17. [AJ719518]	A_87_P037038	CACGGCCTCCCCCCAAGCCCATGTAAGGAGAAGATAGCTGGAAATGTCCCCGGGCTGCAA	up	1.31743	0.0943587	up	1.25187	0.128139
SYT8	Gallus gallus finished cDNA, clone ChEST726i10. [BX934822]	A_87_P022392	CATTTGTCTTTGAGGTGCCTTTCAATCAGATTCAGAACGTGGATGTGGTCATCTCCGTCT	up	1.31742	0.492508	up	1.41345	0.436174
CST3	Chicken cystatin, complete cds. [J05077]	A_87_P009537	TGTGCTATGCAAGTAAAACTATGTAATCTTACTATAGAGCACAGTACGATCTCGACTTTA	up	1.31665	0.268344	up	1.27881	0.381219
CD218648	pgr1n.pk007.j20 Normalized chicken reproductive tract cDNA library (pgr1n) Gallus gallus cDNA clone pgr1n.pk007.j20 5' similar to gb [CD218648]	A_87_P021348	CCAGGACCCCCAAAATGAGCTCACATCGGTGTTGGATCCGCCCCACATCGCACAGCTGCT	up	1.31665	0.170281	up	1.30316	0.194079
AM069923	AM069923 Chicken immune 4 - CSEQRBL09 Gallus gallus cDNA clone C0000878J07_T7, mRNA sequence [AM069923]	A_87_P035352	TTGGGGCCCCCATCCTTTGTGAATTAGAGGACATTTAACCTTTTTCTGAACCCCCCAAAA	up	1.3166	0.47537	up	1.39537	0.435817
LOC408038	Gallus gallus finished cDNA, clone ChEST267m6. [BX934148]	A_87_P022724	CTTTGCCTTCAGTCTTTATTAAGAACCTGACAATGTATCACCTGTATTTTTTGTTCTCCG	up	1.31641	0.0165757	up	1.29896	0.238928
BX930471	Gallus gallus finished cDNA, clone ChEST628d3. [BX930471]	A_87_P024280	GGGGGCATACCAGGCCCTTTTCTGCTGCTTCCAGGCTTTCATTGATGAAGGCGATGAGGT	up	1.31639	0.4807	up	1.12128	0.803298
MGLL	Gallus gallus finished cDNA, clone ChEST585d15. [BX931179]	A_87_P024026	GTTTTTGCAGCAAAAGTACTCAACCTCGTGCTTCCAAACTTGTCGCTGGGATCCATAGAT	up	1.31612	0.0504956	up	1.3735	0.147355
CN234630	RJB103C11.ab1 RJtestis Gallus gallus cDNA 5', mRNA sequence [CN234630]	A_87_P020511	TTTTAGTAAGCTGGTGCTTCAAAAATTTGTCACTGCTGGGGCACTGTGGGTGGGTATGTA	up	1.31612	0.70392	up	1.28384	0.767594
LRIG3	Gallus gallus finished cDNA, clone ChEST72k5. [CR386716]	A_87_P016286	TGCTGTTTGCAGGTATCATGCATCTTATTTGCACATTACTTTTAATAAACTATGCTGCCA	up	1.31542	0.125958	up	1.27537	0.236985
BX932850	Gallus gallus finished cDNA, clone ChEST266i17. [BX932850]	A_87_P023316	AGGGAACTTCATGAAACTCGAGTTCACTCTGCTCAAAGTGACTCCTTAATCTCAGGACCA	up	1.31541	0.00959578	up	1.10089	0.206057
CR386665	Gallus gallus finished cDNA, clone ChEST991m12. [CR386665]	A_87_P016325	TGACGTGAGGAATTTGTTAACAGCTTATTCTACTCTCGAGCAAACTTAATCCAAACCCTA	up	1.31509	0.075512	up	1.25806	0.0577761
LOC423912	Gallus gallus finished cDNA, clone ChEST204h7. [CR391114]	A_87_P013715	TCCAGCTCTGCTTGATGTGCAAGGATTGTAGTTCTCATCCAGGTATTCCCATGGATTGAT	up	1.31496	0.304233	up	1.25997	0.50974
LOC417259	Gallus gallus finished cDNA, clone ChEST1010f10. [CR389919]	A_87_P014494	ATTTTTTACGACTGTACACTCAGGGTCAAAATTGCACTCTGGAAAAGACTGAACACTGCT	up	1.31455	0.020231	up	1.35932	0.025159
RHOJ	Gallus gallus finished cDNA, clone ChEST975f22. [BX929287]	A_87_P024785	ACTTTGGCTCGTCTGCTTTACATGAAGGAGAAACCACTCACCTATGAGCATGGCGTGAAG	up	1.31398	0.0934604	up	1.02237	0.889347
LOC420679	Gallus gallus finished cDNA, clone ChEST445e3. [BX934233]	A_87_P022679	CTGTTCGATTTAGCGCATCACACGGGGATATCTGGCTCCCAGGATACAAGTTTTATGAAA	up	1.31397	0.0331802	up	1.22888	0.125341
BI067328	pgf1n.pk011.k7 normalized chicken fat cDNA library Gallus gallus cDNA clone pgf1n.pk011.k7 5' similar to sp [BI067328]	A_87_P034931	CAGAGCACAATGTTGACACCCTATTGGAAACTCTAAAGAAGACTGGAAAGAGCGCATCCT	up	1.31357	0.141381	up	1.15011	0.39299
BI064837	pgf1n.pk002.k22 normalized chicken fat cDNA library Gallus gallus cDNA clone pgf1n.pk002.k22 5' similar to emb [BI064837]	A_87_P034943	GGAACACCAGGAAAAGACGGATTGCCAGGTCCTCAAAGTCCAAAAGGAGCATCGGGTACA	up	1.31357	0.045152	up	1.27306	0.0871915
BX934685	Gallus gallus finished cDNA, clone ChEST385m1. [BX934685]	A_87_P022476	TCTACAGGCAGGAGCACTACAGATGTCTTAAAAGCAGAGATTCTGCAATTTCTGCTTCCA	up	1.31348	0.0786365	up	1.33491	0.169057
CRYPALPHA	Gallus gallus protein-tyrosine phosphatase CRYPalpha1 isoform (CRYPalpha1) mRNA, complete cds. [L32780]	A_87_P009476	CCAGGTCGAGGAACAGACACCTACGGGATGATTCAAGTGACATTACTTGATACCATTGAA	up	1.31324	0.374623	up	1.1064	0.785424
LOC419037	Gallus gallus finished cDNA, clone ChEST417g9. [CR385344]	A_87_P017184	AAATTTTACATCCTGCGCCTGTGGCTTTAGCAGATATGAACCTCCTCTCGTTTAAGTAAT	up	1.31315	0.166753	up	1.33092	0.217919
RAB11B	Gallus gallus mRNA for hypothetical protein, clone 8i9. [AJ851582]	A_87_P035674	ATTGTACTTCACCAGGTGTAACAGATCTGCCATCAGCAGGGCTAACGACCATCCTATTTT	up	1.31291	0.0826698	up	1.18477	0.162331
RCJMB04_1g17	Gallus gallus finished cDNA, clone ChEST612b14. [CR406127]	A_87_P012984	TTCTCTAGGGAGAAAATGTTCACTTGGGTTCACACACACCTTTGCTCTGGTAGGGCAGAT	up	1.31202	0.0502476	up	1.05661	0.628641
LOC422080	Gallus gallus finished cDNA, clone ChEST474g7. [CR387109]	A_87_P016038	GAAATCCAGGCAATACCTTCAGCACCACTACAGAAGTTGCTCAGCCTTCGAACTCAGCCG	up	1.31191	0.717776	up	1.07612	0.925918
SH3GL1	Gallus gallus finished cDNA, clone ChEST655j21. [BX929897]	A_87_P024540	GGCAGTCAGGCTTCTTCCCGCTCAACTACGTGGAAGTGCTGGTTCCACTACCTCAGTGAA	up	1.3119	0.43931	up	1.20034	0.637401
PCX	Gallus gallus pyruvate carboxylase (PYC) mRNA, complete cds; nuclear gene for mitochondrial product. [AF509529]	A_87_P037577	TCCACGTGAGACCTGGGATGAGCCTGGAGGGGGACGACCTCATCGCCGAGATCGAGTAAA	up	1.31182	0.640826	up	1.15907	0.786883
REL	Chicken c-rel gene encoding p68 c-rel proto-oncogene. [M26381]	A_87_P009376	CTTTCCAGAAGCATGAAAGAGATACAGAGAACGCTTGCAATGTGTCGTTTATTCAGTTCT	up	1.3118	0.0135378	up	1.22288	0.0724091
GPX4	Gallus gallus phospholipid hydroperoxide glutathione peroxidase (GPX4) mRNA, complete cds. [AF498316]	A_87_P037585	AGCCCAAGGGCCGGGGCACGCTGGGGAATGCCATCAAGTGGAACTTCACTAAGTTTCTTA	up	1.31179	0.0182204	up	1.28677	0.00455175
BMP1	Gallus gallus bone morphogenetic protein 1 (BMP1) mRNA, partial cds. [U75331]	A_87_P009024	CTCCTACAACACCGTGGCCAAGAGGGGCTTCAAGGCGCACTTCTTCTCAGAGAAGAAGCA	up	1.31173	0.66042	down	1.0204	0.977712
CV037755	4134763 BARC_3GAL chicken mixed tissue Gallus gallus cDNA clone 3GAL_28L01 5', mRNA sequence [CV037755]	A_87_P010717	ACTGGATACCATGCGGTTAGTAGATCTTCTTTTGGTGCTACTGTTCGAAGGGAGAAAAGC	up	1.31155	0.0799843	up	1.19259	0.272635
NDUFB6	Gallus gallus finished cDNA, clone ChEST624m11. [BX930426]	A_87_P024304	TTCCCAGGGGACAGAATTTTAGAGACGGGAGAAACTGTTCCACCTCTGGCAGACGAACCC	up	1.31152	0.0325791	up	1.20927	0.17288
AM063228	AM063228 Chicken immune 1 - CSEQRBL08 Gallus gallus cDNA clone HFU603551319_R1_M13F, mRNA sequence [AM063228]	A_87_P035416	ATCTTTTTCCCTCCTTTTCAGGGAACTTGTGAAACATCATAGGTAAAGTGCCATCTCATG	up	1.3114	0.752184	up	1.09635	0.942581
AM068249	AM068249 Chicken immune 3 - CSEQRBN33 Gallus gallus cDNA clone C0000485L01_T7, mRNA sequence [AM068249]	A_87_P035361	GCTTCCATGTGTCAGTGTGGGGTGAGTGCCTGGATGGATGGCAATGAATGTTCATCACCT	up	1.3113	0.76059	up	1.10529	0.923713
LOC423969	Gallus gallus finished cDNA, clone ChEST467h19. [CR391756]	A_87_P013242	GTCTGAGTTACGTTCCTGTATGTGGAAAGTCTGCATGAGATTTTTCTCATCATCTTTGTA	up	1.31128	0.0332908	up	1.24325	0.101977
LOC425820	Gallus gallus finished cDNA, clone ChEST986e12. [CR389422]	A_87_P014828	GGGGGGAGGGGGCTGAGGGGAGCCCAGTGGATGCTCAGGAACAAGGTCTGGAAATTAATA	up	1.31096	0.134341	up	1.11116	0.593972
CR353089	Gallus gallus finished cDNA, clone ChEST240m5. [CR353089]	A_87_P018175	ACTTCCAGGAGATCACGAGGTATACAAAATAACAAAGGTTGCAGTGATTCCACTTTCCGA	up	1.31051	0.133573	up	1.49997	0.0644024
RCJMB04_11e18	Gallus gallus mRNA for hypothetical protein, clone 11e18. [AJ851612]	A_87_P035656	ATGCCTGGGTGACTTGCAGCCATTTATAACAACTGTGAAGAGCTGAGACCCAGTATTTCA	up	1.3105	0.104583	up	1.28549	0.180806
NPY5R	Gallus gallus neuropeptide Y receptor Y5 (NPY5R), mRNA [NM_001031130]	A_87_P009243	TTTGCAGACTGACAGTGCTAATCCTAGTTTTTGGTTTTAGCTGGATGCCTCTTCACCTTT	up	1.31048	0.64983	up	1.22563	0.778762
AMID	Gallus gallus finished cDNA, clone ChEST192n3. [BX950705]	A_87_P021503	GACAGCTCTGAGCAAGAAACCTGGTTTACCTTAATTTGTAACAATAAACACCCTGGTTTT	up	1.3103	0.0277443	up	1.13838	0.236017
LOC420277	Gallus gallus finished cDNA, clone ChEST443d8. [BX934186]	A_87_P022700	AGACTGAAATAGAAGAGCTCAAAACTCAGTTAGGACGCATGAGGGAAGACTGGATTGAAG	up	1.31017	0.296651	down	1.08286	0.810624
SLC25A3	Gallus gallus mRNA for hypothetical protein, clone 4e21. [AJ719594]	A_87_P036989	TGTTTGCTCGTATCATCATGATTGGTACGCTGACTGCGCTACAGTGGTTCATCTACGATT	up	1.30997	0.102634	up	1.1894	0.228829
CN233229	RJA108A12.ab1 RJbrain Gallus gallus cDNA 5', mRNA sequence [CN233229]	A_87_P020532	AACCGTCTTTGCCTTTGTCATCTTCCTCCTCGTCTTCTTGGTGATGCTGATGGTGCGCTG	up	1.30989	0.712424	up	1.07004	0.931486
AI980662	pat.pk0029.f3.f chicken activated T cell cDNA Gallus gallus cDNA clone pat.pk0029.f3.f 5' similar to U1 SMALL NUCLEAR RIBONUCLEOPROTEIN C (U1-C), mRNA sequence [AI980662]	A_87_P037557	AGCCTGATTGATAAAACAATAGCGGCTGCATTTCAGCAAGGGAAAATTCCACCGACACCA	up	1.30985	0.0269485	up	1.13392	0.304855
AJ720157	Gallus gallus partial mRNA for hypothetical protein, clone 11m5. [AJ720157]	A_87_P036600	TGCATCCAGGAATGGAACATACAAATTCTGTTTCAGCAATGAATTCTCTACGTTCACACA	up	1.30963	0.0995518	up	1.26506	0.271442
BM491891	pgp2n.pk007.l5 Normalized Chicken Pituitary [BM491891]	A_87_P034830	TTGGAACCCAGATGACCTGAATGCCTCCCAGGGCACATCACTGCCCACACCGGAGTGGGT	up	1.30959	0.269213	up	1.02789	0.889039
CN778425	pgn2c.pk007.c4.f Chicken Lymphoid cDNA library (pgn2c) Gallus gallus cDNA clone pgn2c.pk007.c4.f 3'end of pat.pk0043.f9 5', mRNA sequence [CN778425]	A_87_P020380	AGGGAAGGGGGACACGATGCGGATGTAGAGCACCTTCAGCTTCTCCTGCCTCTCCGGGAA	up	1.30957	0.679096	down	1.25665	0.631665
HSPA4	Gallus gallus finished cDNA, clone ChEST654n13. [BX931422]	A_87_P023938	ATTCACCAGCAGAAGAAAGGGTTAAAGTGACTGTGAGGTCTTTTCCCAAGAACCATGCTG	up	1.30928	0.0832326	up	1.44751	0.0751739
ITGA1	Gallus gallus alpha 1 integrin mRNA, partial cds. [U10114]	A_87_P009155	AGCAACAACGGATCAGCAAGCAGCTTCATTTGAAATGGAAATGTCACAGGCTGGTTTCAG	up	1.30923	0.116876	up	1.26041	0.215877
NOTCH1	Gallus gallus mRNA for notch-1, partial cds. [AB044789]	A_87_P038157	CCGAAGGTTTCTCAGGTGTTCACTGTGAGATCGACATCGATGAGTGCAACCCCGACCCGT	up	1.30911	0.422876	up	1.23138	0.611152
PEBP1	Gallus gallus finished cDNA, clone ChEST144f21. [BX936164]	A_87_P021776	TGAGAGGCTTTGCTTTGCTCAACTTCTGTTGTGACCAGGTGTTTGCTCACAGTGCAATTA	up	1.3087	0.0107684	up	1.27324	0.0495617
SLC13A4	Gallus gallus finished cDNA, clone ChEST1037d19. [CR338786]	A_87_P018842	ACGTGGGGAATTAGACTCTTCCAGCTGAATACTTTTCCAGAATGGGCAGCAGTAAGCAAT	up	1.30859	0.113968	up	1.52289	0.0534221
CYP7B1	Gallus gallus oxysterol 7alpha-hydroxylase (CYP7B1) mRNA, partial cds. [AY700579]	A_87_P035079	TACAAGGCAGGAAGAAAACTGAAGTATTTCCTAATGCCCTTTGGCTCTGGGATCAGCATG	up	1.30844	0.624148	up	1.37605	0.590861
CN221287	RJA075A10.ab1 RJbrain Gallus gallus cDNA 5', mRNA sequence [CN221287]	A_87_P020815	TGGGTGAAGATATGGTTTATGGTTGGGCATGAGAAGAAAACATACAGAAATCAGGAGTAG	up	1.30834	0.763649	down	2.4343	0.342204
LOC395884	Gallus gallus CMP-N-acetylneuraminate-beta-galactosamide-alpha-2, 3-sialyltransferase mRNA, partial cds. [AF035250]	A_87_P037983	TCCACCTCTGTGACTTGGTGCACATTGCCGGCTTTGGCTACCCAGACGCCTACAACAAGA	up	1.30785	0.524621	up	1.4693	0.413926
ASB9	Gallus gallus mRNA for hypothetical protein, clone 18g24. [AJ720472]	A_87_P036388	ATTCATTGGCCGCTTTAAGATGTCCATCTCTACTCTTTCCCTCCTGTTGAAGGGGGAAAA	up	1.30779	0.00354672	up	1.40153	0.00444091
AGMAT	Gallus gallus putative agmatinase mRNA, complete cds. [AF401291]	A_87_P037643	TGCAGACACGGGGTCTATATTTGGCACATGGAAACACAAAAGCCACCTCATCACACATTA	up	1.3076	0.0259122	down	1.04992	0.602316
ENTPD2	Gallus gallus cell membrane ecto-ATPase mRNA, complete cds. [U74467]	A_87_P009025	ACCCCAAGGCAGACAGCTGGGAGGATGTGCCTTTATTTCTGAACAAGTGAAAACAAACAA	up	1.30751	0.0653554	up	1.2364	0.181074
BX934263	Gallus gallus finished cDNA, clone ChEST53b15. [BX934263]	A_87_P022666	AAATGGCTATCCCCATCATGCTCCAGAAGCTTATTTCCCATACTTCAGGAAACATAAGGT	up	1.30744	0.0167329	up	1.23583	0.169185
LOC424998	Gallus gallus finished cDNA, clone ChEST788p3. [CR390462]	A_87_P014136	ATTTGTTGCTTGAAAGCTTGGACACGTGGGTTTTTCGTTTTCTTTTTGCTTTTTGTAAAG	up	1.3071	0.485922	up	1.31676	0.505892
COL18A1	Gallus gallus collagen XVIII mRNA, complete cds. [AF083440]	A_87_P037922	AGCCTGTGGATCTTTATATTTTTTGTCAATTGTGTCCCATAAACCATTTTCTAAAGGCAC	up	1.30707	0.0255567	up	1.2536	0.0390414
CR353875	Gallus gallus finished cDNA, clone ChEST218c18. [CR353875]	A_87_P017674	CCAGCTGCACAGGAAAATCACCAGTAATTTGAGTCTTGCTCAGCAACACTGGTCACATTT	up	1.30702	0.00302972	up	1.14525	0.259204
CST7	Gallus gallus finished cDNA, clone ChEST920d20. [CR353763]	A_87_P017734	ACTTGCACTGACTGCATTTATTGCTATCCAGCTGTGTATCTCTTTTTCTAAAACTAAACA	up	1.30701	0.2343	up	1.43914	0.20553
NRP2	Gallus gallus mRNA for neuropilin-2, complete cds. [AB090235]	A_87_P038108	CATCCGGCTGGGCAACGACATCCCCCTGGAGTACTGCATGGAACCCATCACAGCTTTCCC	up	1.30695	0.00145483	up	1.23164	0.0113092
CWF19L2	Gallus gallus finished cDNA, clone ChEST349f14. [CR353295]	A_87_P018032	AAAGTTGCACCCAAGAAGGAAAATGATTATAGAAGTGGTAGGTGGAAAAAACCTGACTAC	up	1.30685	0.535472	up	1.09882	0.854156
NCOA6IP	Gallus gallus mRNA for hypothetical protein, clone 20d7. [AJ720557]	A_87_P036325	AACAAAACTCTGACAGAAGGTGGAAGCATTCCTGCAAGCAGGTTAATGAATCTGTGGAGG	up	1.30646	0.748133	up	1.11139	0.91237
BX929740	Gallus gallus finished cDNA, clone ChEST550d13. [BX929740]	A_87_P024606	GGCTGCCTGCAGAGCAAAGTCAAAACAACGTCCTCTTCTTAACCTGAACTTTTCTTACAT	up	1.30644	0.0226761	up	1.1884	0.111815
LOC424067	Gallus gallus mRNA for hypothetical protein, clone 33c18. [AJ721039]	A_87_P035985	GTCAAAATCTTCCTCAGTTAAATCATCCAGTGCTACAAAGCCAACTTGAAACAAAACCAG	up	1.30638	0.348682	up	1.26672	0.45358
CD215306	pgm2n.pk014.i9 Normalized chicken muscle cDNA library (pgm2n) Gallus gallus cDNA clone pgm2n.pk014.i9 5' similar to dbj [CD215306]	A_87_P021388	ATCAACAGCCTCTGCTTGTCCAACGGAGGAATTTTCCCCGAAACGTACTACCCCAGATTC	up	1.30615	0.435748	up	1.22264	0.55041
RCJMB04_3c6	Gallus gallus mRNA for hypothetical protein, clone 3c6. [AJ719532]	A_87_P037029	ACGCAGCATGTTATCAAGCGTGCAGAGACTATTCCATATTACGGAGTAACGAAATACGAC	up	1.30612	0.0682506	up	1.20252	0.219126
CCK-CHR	Gallus gallus mRNA for cholecystokinin receptor (CCK gene). [AJ489483]	A_87_P037253	CCGACGAGGACGTGGCCAACGCCAACGCATCGCTCTCCAAGTTCAGCTACACCACTGTCA	up	1.30604	0.743722	up	1.3101	0.775403
RCJMB04_1m14	Gallus gallus mRNA for hypothetical protein, clone 1m14. [AJ719383]	A_87_P037127	AAGAACTTTCCAAAAGAAAGATGATGTTCTGAAGTTAACTCATGTAAGCTTTATCCCTGG	up	1.30603	0.545721	up	1.25411	0.653552
LOC416311	Gallus gallus finished cDNA, clone ChEST169c12. [CR388887]	A_87_P015163	AACGTGTTGCATGTCACCACTGTACCTTGGAGAAACTCCACTTACCTCCTCTGTTTATCT	up	1.30582	0.0205976	up	1.22315	0.327099
BSX	Gallus gallus brain-specific homeodomain protein (BSX) mRNA, complete cds. [AY500594]	A_87_P035153	GGCTCCTTTCGCCCCTTTGGCTGCATCCCAGCGTCACCCCAAGCCTGAACTTTGCTTGGA	up	1.30552	0.533777	down	1.05044	0.899293
LOC416097	Gallus gallus finished cDNA, clone ChEST552e18. [BX931958]	A_87_P023717	GTTCTGTGACTCAGAGATGTTATCTTACAGGCTTTGCCACATAAGTGTAAATGGACTTGT	up	1.30546	0.0967559	up	1.16849	0.342681
RPL37	Gallus gallus finished cDNA, clone ChEST151k18. [BX934858]	A_87_P022373	ATATCTGAAAATATGTATACTTATACAATTTTCAGCGATATGAAAAGATTCATTAAAAGT	up	1.30544	0.182521	up	1.17851	0.397842
AJ851659	Gallus gallus mRNA for hypothetical protein, clone 15k1. [AJ851659]	A_87_P035628	AAGTTATATTGTACACTCCGTTTAGCTTCCTCAGAAATAAAAGATGTCTTGTATGTGCTG	up	1.30476	0.0985438	up	2.00454	0.016326
CN226400	RJB047C03.ab1 RJtestis Gallus gallus cDNA 5', mRNA sequence [CN226400]	A_87_P020748	GCCCGTCCTGACGATAAACTCCATCATCTACGGCCTGCAGTACCTTTTCCTGGAGCCGAA	up	1.30475	0.350464	up	1.2596	0.452629
CR353792	Gallus gallus finished cDNA, clone ChEST917p16. [CR353792]	A_87_P017721	GAAGCTGAAGCAGAAGAGCTTGAAGCAACGCCTCGGGAAAAGCAACATCCAGGCACGGCT	up	1.30452	0.110801	up	1.0293	0.857882
ANKIB1	Gallus gallus finished cDNA, clone ChEST1003e11. [CR390028]	A_87_P014414	TGAATAACGAGGCATCTTTAGGAGCAATAGGGACCTCTTTACCTACAAGACTGGACTCTG	up	1.30442	0.529888	up	1.73932	0.409758
KCNQ4	Gallus gallus finished cDNA, clone ChEST650e12. [CR391435]	A_87_P013460	AGGTGGAGAGACAGGTGCAGTCCATCGAGCACAAGCTGGACCTGCTGCTTGGCCTCTACT	up	1.30422	0.441836	up	1.28907	0.519511
AJ851692	Gallus gallus mRNA for hypothetical protein, clone 18f23. [AJ851692]	A_87_P035606	AAGCAGCTATCAGAGAGCAGTGCAGTCAGCTCTCCCTTCCTTTCCTTCTCCTGTCTCCTG	up	1.3042	0.341679	down	1.02531	0.884554
IMPA1	Gallus gallus finished cDNA, clone ChEST627g1. [BX930462]	A_87_P024283	GGGATCAAATCGTGATCCAGAGACTATAAAAATAGTTCTTTCTAACATGGAAAGACTCCT	up	1.30395	0.114983	up	1.22152	0.314481
RNF11	Gallus gallus mRNA for hypothetical protein, clone 13b16. [AJ720228]	A_87_P036549	TTACACTTGGATGCCTACTTGAACTTGATCAAGGTAAAAGTGGGCCAGATGCACAATAAA	up	1.30346	0.0348461	up	1.24891	0.11446
BX935535	Gallus gallus finished cDNA, clone ChEST531e4. [BX935535]	A_87_P022094	CCGCATCATCATGTAGCACCCGCTGTGCTCTCTCCTGGCTCTGTTTAGATTAAATATTTA	up	1.30328	0.00982763	up	1.1575	0.1409
STMN2	Chicken SCG10 protein mRNA, complete cds. [L14938]	A_87_P009501	CCCCCTGCCTATATTATTATGGATCATGCGATATCAGTATGGGAAATGTATGACATGGTT	up	1.30298	0.0289556	up	1.24705	0.0313247
ALG6	Gallus gallus mRNA for hypothetical protein, clone 6f21. [AJ719772]	A_87_P036868	GTCATACAACTCCTGTAAGCTATTGGAAACTGGGAAATGTGTTACACGTTTAGCTATGAA	up	1.302	0.0824322	up	1.17723	0.265563
AP2B1	Gallus gallus finished cDNA, clone ChEST795h24. [CR523003]	A_87_P011911	GAAAGACATTCCCAATGAAAATGAGCTGCAGTTCCAGATTAAAGACTGTCACCTGAATGC	up	1.3018	0.0837857	up	1.20473	0.351234
LSM5	Gallus gallus finished cDNA, clone ChEST536e2. [CR354370]	A_87_P017366	GTAGTAATTATATTTGACATACCTGGCCAAACCTTAGTCCATGTTTTGCAGTAAAAGGCT	up	1.30179	0.738482	up	1.22393	0.819401
BX935733	Gallus gallus finished cDNA, clone ChEST323e10. [BX935733]	A_87_P021971	GGGGGGCAGGAAGTTGCATTGAAGGGGAATTATTTTGTTTTTGTTTAACCTCAAATATGT	up	1.30172	0.136342	up	1.01565	0.918227
BX932446	Gallus gallus finished cDNA, clone ChEST634c9. [BX932446]	A_87_P023494	CTATGAAAATGTAGTGGAAACGGGTTCAGAAACAGATGAGGAGGACAAGCTACACATCGC	up	1.30166	0.550476	up	1.27519	0.624282
HECW1	Gallus gallus finished cDNA, clone ChEST555e7. [CR523818]	A_87_P011346	GCGTTTCTGTATAGAGAAATGGGGGAAAATAACCTCCCTTCCGAGGGCACATACATGTTT	up	1.30131	0.215342	up	1.24677	0.362716
SCN4B	Gallus gallus finished cDNA, clone ChEST430l23. [BX935954]	A_87_P021873	TCGGCGGGGAGCCTCTCCCTTTTGTTTCCTTTCCAAACTGCCAACGCTCGAGACGTGTTT	up	1.3011	0.0934604	up	1.26626	0.163455
LOC416717	Gallus gallus finished cDNA, clone ChEST538c4. [BX950498]	A_87_P021610	GCTGTATTTGTGATGCACAAGTCCTGCTTCTCTAAACCTTGTGAAACCTTGTGAAAGGAA	up	1.30085	0.706057	up	1.55142	0.604969
AJ890101	Gallus gallus 7SK small nuclear RNA [AJ890101]	A_87_P035510	GGTAGTCAAGCTTCCAAGACTGCAGACACATCCAAGTGAGGCACTGCATGGGGCAGTCTG	up	1.30085	0.0537128	up	1.07839	0.628575
CR352567	Gallus gallus finished cDNA, clone ChEST832m19. [CR352567]	A_87_P018507	TTTTGCTGTGGCATGGTGAATATGAGCTTTCCTTTGTCTGATCAGCCTGTGTTTGGAGAG	up	1.30049	0.0763817	up	1.13593	0.375163
ICK	Gallus gallus finished cDNA, clone ChEST54j13. [BX933981]	A_87_P022787	TTGGACATGCTTTAGGCCTTCAGGAGCTGACGAGGCAAAAGGAACTCCATGATAAATCAT	up	1.30043	0.586569	up	1.32459	0.612026
BX935496	Gallus gallus finished cDNA, clone ChEST860p7. [BX935496]	A_87_P022117	GACCTCTTCAAATGCAGGCTGAGATCAGCAGCAGAAGTGACTGTGTTAATGACTACCATA	up	1.29999	0.0316959	up	1.24378	0.0378975
LOC421733	Gallus gallus finished cDNA, clone ChEST508n7. [BX933225]	A_87_P023141	TGTGGACAGCACATTAGGGTTCCTTCCCTGGCACATCAGACTAACAGAGATCATTTCTTT	up	1.29999	0.00551412	up	1.4471	0.011863
ZBTB17	Gallus gallus zinc-finger protein mRNA, partial cds. [U14555]	A_87_P009142	ACGGTGTAAAAAGTGTATTTCTGGAAGGAGAGAGAGAAGGAATAAATTGCAATATTTTCT	up	1.29981	0.0212014	up	1.33989	0.0367919
LOC417740	Gallus gallus finished cDNA, clone ChEST998d24. [CR339030]	A_87_P018662	TAACTGTATGGCTCCCATCTTTTCGGAACTCAGAAGAAAGCGGGGGAAGCTGTAAATGTT	up	1.29977	0.00699989	up	1.28986	0.0464336
BI393224	pgp1n.pk010.i21 Normalized Chicken Pituitary [BI393224]	A_87_P034912	TTTGTGGTTGAAACTGTTATCTGCAAAAAATCATGAAGCCCCTGTCCAGCTGTAACCTTC	up	1.29971	0.432844	up	1.32778	0.394121
THEX1	Gallus gallus mRNA for hypothetical protein, clone 8i1. [AJ719933]	A_87_P036756	CCCACCTGAATTTATACACGAAATAATTGAGTTTCCTGTTGTCTTATTAAACACACACAC	up	1.29968	0.241254	up	1.17478	0.403371
BX931558	Gallus gallus finished cDNA, clone ChEST393k6. [BX931558]	A_87_P023877	ATCCACCCTGCCTTCCTCTGCTTCTGGGTACCAGTTACGAGTGGGTCAGTACAGCCAACA	up	1.29954	0.629922	up	1.29325	0.66075
CN231838	WLB045B10.ab1 WLtestis Gallus gallus cDNA 5', mRNA sequence [CN231838]	A_87_P020575	TCCCTGAGATGTGCAATGAGCTCTTCTGGTGGCCAATTAAAGGGCTGGGAGGAGAGCGAG	up	1.29936	0.415144	up	1.37424	0.381721
LOC421956	Gallus gallus finished cDNA, clone ChEST727o5. [BX934801]	A_87_P022408	AGAAGATGTGTGGGGCAACCCCGTCTTCCGTGCATCAGTGCTCGCCTGTCATGTAGTCAA	up	1.29861	0.730866	down	1.0386	0.968576
BX950804	Gallus gallus finished cDNA, clone ChEST773h21. [BX950804]	A_87_P021444	AAGAGAGAACATGCAAAACAACACGGGATGATACGAACTGAAATTACAGGAGCTGAGATT	up	1.29726	0.110369	up	1.40719	0.127513
RCJMB04_10b24	Gallus gallus mRNA for hypothetical protein, clone 10b24. [AJ720068]	A_87_P036668	TAGAGAAGGAAAGGCAGCCAAAGGATGCTGAAGACAATGTGCAAGCACCAGAACTTCAAT	up	1.29712	0.00921757	up	1.25784	0.00718898
DCTN1	Gallus gallus mRNA for dynactin. [X62773]	A_87_P008883	AGGAAAAGCTGGAGACGCTGAAGATCAAGCGCAATGAAGACAAAGCCAAGCTTAAGGAGC	up	1.2969	0.0823246	up	1.19454	0.232823
ZDHHC20	Gallus gallus finished cDNA, clone ChEST351n16. [CR389100]	A_87_P015031	CTGAGAAAAATCTTAGTGCAGTCACATGTCGTTAGAAAATGGAACTGGAAGAGTACTGCT	up	1.29661	0.0316959	up	1.266	0.0782728
LOC407092	Gallus gallus clone C540 AD012Z mRNA, partial cds. [AY188762]	A_87_P035247	ATATCAGTGGCTCAGTCTATAACAAGACTCAGACGTTTGACAAGCAGGGATTCCACGCCG	up	1.29649	0.222495	down	1.05565	0.773506
CR354198	Gallus gallus finished cDNA, clone ChEST64i22. [CR354198]	A_87_P017477	TCCTGTGTTTGTAAGGACTTTGTCTGATAGACTCTGGTGTCAGATATAATTCTGAGGGGG	up	1.29583	0.0976338	up	1.32407	0.105022
AI982401	pat.pk0043.a6.f chicken activated T cell cDNA Gallus gallus cDNA clone pat.pk0043.a6.f 5', mRNA sequence [AI982401]	A_87_P037542	GCTTCAAAGCACACCCGTTTCACCTAACGAATTGGTCCCTAACGGACGCTCGAGCTTCTT	up	1.29577	0.613862	up	1.40151	0.532711
CO765994	spleen_EST01720 Spleen cDNA Library Gallus gallus cDNA 3', mRNA sequence [CO765994]	A_87_P019660	GTAATACTAGTCAGTGCTGTAAAATAGGTTTCTCTTTTATATGCGATTAATCCTTGAGGG	up	1.29576	0.0336171	up	1.07297	0.143735
PPP3CA	Gallus gallus calcineurin A alpha mRNA, partial cds. [AY324834]	A_87_P035203	GGGAATGAACATGTTTTCCTACTGCACTGGGAACTTCTAGATATGTTACTGAAAGGCCTT	up	1.29572	0.016837	up	1.1938	0.052223
ANKRD17	Gallus gallus finished cDNA, clone ChEST198g6. [CR733102]	A_87_P010829	AGTGTGGTTTGTTACCTTCTAGACTACCCAAACAACTTGCTTTCTGCTCCTCCACCTGAT	up	1.29564	0.666585	up	1.14388	0.86171
RBBP6	Gallus gallus finished cDNA, clone ChEST426f20. [CR406942]	A_87_P012420	TGAAGAGCCATCCTCCTCCTCAGAAGAGGATGATCCTATTCCAGATGAGTTGTTATGTCT	up	1.29556	0.553931	up	1.26561	0.637401
PRKDC	Gallus gallus dna-pkcs mRNA for DNA-dependent protein kinase catalytic subunit, complete cds. [AB016240]	A_87_P038198	GACAATCTGGAAGGTGCTCCACTCATCCAGACCACAGCACGAGTTTGCACCCTCTGCACT	up	1.29555	0.152584	up	1.20563	0.276942
PDLIM3	Gallus gallus mRNA for partial alpha-actinin associated LIM protein, skeletal muscle isoform (alp gene). [AJ249219]	A_87_P037492	AGGAAGATGGACGTCCAGTGGGTACAAGAAGTGTGAAAGCACCTGTAACAAAGATACCTA	up	1.29549	0.147912	up	1.53765	0.0585487
RXRG	Gallus gallus retinoid-X-receptor-gamma (RXR-gamma) mRNA, partial cds. [S72435]	A_87_P009185	AAATGCAGCCAGGCATGCAGGCTCCTTACTCCCTGGAGATGGGCTCCTTCCCTCACTTCT	up	1.2954	0.668881	down	1.04664	0.947843
CR353683	Gallus gallus finished cDNA, clone ChEST231p16. [CR353683]	A_87_P017779	ACTGCGCTTCTATTTTGAGTAGCGGTGGTGTGAGCTGTTTTCCTGAATGCTTCACAGATT	up	1.29471	0.414305	up	1.19758	0.562825
TNRC6B	Gallus gallus finished cDNA, clone ChEST531n21. [CR352353]	A_87_P018649	GAATGTGGGTCTTTCAGATTTACAGACCAAAGGACAAATACCTGGATACGGTTCAGGCTT	up	1.29435	0.557416	up	1.29152	0.535029
CD214779	pgm2n.pk012.m15 Normalized chicken muscle cDNA library (pgm2n) Gallus gallus cDNA clone pgm2n.pk012.m15 5' similar to ref [CD214779]	A_87_P021391	TGTTCTCACTGCCCACCGACCTCAGCACCCCCGAGCTGTTGGCCTTCGCCGGATACAAAT	up	1.29417	0.0340911	up	1.20998	0.24032
AJ392909	AJ392909 dkfz426 Gallus gallus cDNA clone 13h10r1, mRNA sequence [AJ392909]	A_87_P037439	AGCAGCTGTCGCAATGCATCCAGGAGCTGGAGAGGAAGAACAGCCTGCTGGCAGCCTGGA	up	1.29407	0.551111	down	1.07164	0.850733
P100	Gallus gallus transcriptional coactivator p100 mRNA, partial cds. [AF396952]	A_87_P037644	CCTGTGGCGCTATGGGGATTTCCGTGCTGACGATGCAGATGAGTTCGGCTACAGCCGCTG	up	1.29405	0.158783	up	1.21518	0.282283
FDX1	Gallus gallus proferredoxin mRNA, nuclear gene encoding mitochondrial protein, partial cds. [U25823]	A_87_P009120	AAAGCGTTTGAGTCTCCTGTAAGTGTGCCAATGGAGGGAACAGCAGGACAAGACAAAAAA	up	1.29387	0.00477271	up	1.19868	0.0312516
STAT5B	Gallus gallus signal transducer and activator of transcription 5 (Stat5) mRNA, partial cds. [AF144565]	A_87_P037866	CATGTACACACAGAACCCCGAGACCGTACTGGACCCCGAAGGCGACTTTGACCTGGACGA	up	1.29368	0.02013	up	1.27699	0.0399817
SLC6A2	Gallus gallus norepinephrine transporter mRNA, complete cds. [AF237673]	A_87_P037754	CAGAACCCATGCTGGAGCTACTAAGTACAGAATCCAGTTTAATATCACACTGTATTTAGT	up	1.29358	0.531677	up	1.37644	0.508479
LOC420986	Gallus gallus finished cDNA, clone ChEST162d6. [BX935810]	A_87_P021936	AGGATCAGGCAGTCAGGAGAGAGACTGAAACAATCTGGGATAAGGATCAAGAAAACCATC	up	1.29284	0.244643	up	1.44123	0.226086
HGS	Gallus gallus finished cDNA, clone ChEST688m21. [BX933347]	A_87_P023077	AGATCTTCTGTGGCAAGTGTTCCTCCAAGTATTCCACTATTCCCAAGTTCGGGATTGAGA	up	1.2928	0.680633	up	1.13061	0.874482
CR352688	Gallus gallus finished cDNA, clone ChEST34m18. [CR352688]	A_87_P018431	TGCACTGGGGATCATAATCTGGGCAATGCTAGAAAGAATCACATTCATAGACACAGAGAC	up	1.29263	0.551484	up	1.45388	0.414745
RCJMB04_16j9	Gallus gallus mRNA for hypothetical protein, clone 16j9. [AJ851671]	A_87_P035620	TACATCAAACCCTGCACCTGTCCATGAGGTGGCAACATTTGTCATGCTTGCTGAAGTAAA	up	1.29254	0.0078527	up	1.19263	0.0202044
OTOR	Gallus gallus otoraplin (Otor) mRNA, complete cds. [AF233518]	A_87_P037755	TAATCTCCAGGGTGCTATCAAGAAATGCTGACAAAGAAACACGGAACCCTTCACCGAACA	up	1.29253	0.597222	down	1.02319	0.9704
CD218354	pgr1n.pk006.j15 Normalized chicken reproductive tract cDNA library (pgr1n) Gallus gallus cDNA clone pgr1n.pk006.j15 5' similar to dbj [CD218354]	A_87_P021356	AGGCATTCGACAGCGTCACCATCTACTTCAGCGACATCGTGGGCTTCACGGCGCTGTCGG	up	1.2925	0.210939	up	1.2395	0.0507662
RCJMB04_3p13	Gallus gallus mRNA for hypothetical protein, clone 3p13. [AJ851498]	A_87_P035732	CGGTTTCTTCAGTACAATGGGGACCTGGATTTGGGGTTCTGTCTGTAAAATAACGGTGTT	up	1.29221	0.00790271	up	1.23473	0.0963161
LOC417929	Gallus gallus finished cDNA, clone ChEST977f5. [BX929432]	A_87_P024722	TTCACAACGTTTCCTAAGTCCCAGAAGAATTTTAATCTCCTGCATCCAATTTTTCAGAGA	up	1.29214	0.0131191	up	1.30728	0.0460646
USP4	Gallus gallus mRNA for hypothetical protein, clone 11i7. [AJ720146]	A_87_P036609	GTACTACTTCGATGACAGCAGTGTATCGTTGGCTTCAGAAGACCAAATAGTGACGAAAGC	up	1.29186	0.110369	up	1.14601	0.499713
HSPG	Gallus gallus mRNA for basement membrane-specific heparan sulfate proteoglycan core protein precursor (HSPG gene). [AJ584653]	A_87_P037230	GGAGGAGCCGGTGTTTGGAGAGTCCCCAGGAACCAATGTCATGGCCAACACCCAGGGCAA	up	1.29166	0.064127	up	1.08402	0.435817
LOC396450	Chicken erythroid-specific transcription factor eryf1 mRNA, complete cds. [M26209]	A_87_P009378	TCAAAGCGACGCTCTGTACGCTCTCGGCCCCGTGGTCCTTTCGGGCCATTTTCTGCCCTT	up	1.29111	0.173508	up	1.10256	0.47471
ATP6V0B	Gallus gallus finished cDNA, clone ChEST613n3. [BX934513]	A_87_P022562	AGGTGCTGTATATACTTATTTAACGTTTCTATCCTTGGTTGGGGCGGAAGCTGCCCAGGA	up	1.29106	0.19122	up	1.06783	0.674816
CN235251	WLA105G07.ab1 WLbrain Gallus gallus cDNA 5', mRNA sequence [CN235251]	A_87_P020503	AGACCTGTGAGCACTGGAAGCAGATCTTCATGGAGATTATAGGAGTGCAAAGTGCCCTGT	up	1.2908	0.654365	down	1.15948	0.788743
ST3GAL4	Gallus gallus partial mRNA for alpha-2,3-sialyltransferase ST3Gal IV (siat4c gene). [AJ866777]	A_87_P035514	TGCAGGCTTTGGGTACCCTGACTCGGCCAACAAGAAGCAAACCATCCACTACTATGAGCA	up	1.29057	0.207573	up	1.59013	0.0404471
LOC421011	Gallus gallus finished cDNA, clone ChEST133m10. [CR406490]	A_87_P012745	TCAGGAGATTTTACAGGCTGGTACCGCTATAAAACCTGAATCCCTGATAGAGCAGGAGAA	up	1.29046	0.457908	up	1.27261	0.52026
AJ393174	AJ393174 dkfz426 Gallus gallus cDNA clone 14i19r1, mRNA sequence [AJ393174]	A_87_P037438	TGTGTGCTGGAGTACCCCCGTCCCTCAGTGCCTGCTGCTTTCTCCCCCACAGATAAGCGA	up	1.29026	0.389753	up	1.29879	0.402108
DNAJC12	Gallus gallus finished cDNA, clone ChEST529k20. [BX950610]	A_87_P021551	AACTGAAAACGATGAAGATGGATTGTCTGATGGGAACAGGGAGCAAGATGTTGCAATTCC	up	1.29013	0.522148	up	1.27034	0.614945
CR733318	Gallus gallus finished cDNA, clone ChEST555e17. [CR733318]	A_87_P010757	TTAAAAAAGCGAGCCGTTATTCCATCCCAGATCTGGCTGTTGATGTGGAACAGGTAATAG	up	1.29011	0.169467	up	1.36964	0.0521714
AM065221	AM065221 Chicken immune 2 - CSEQRBN29 Gallus gallus cDNA clone C0000463K21_T7, mRNA sequence [AM065221]	A_87_P035395	GGGCTGAAGCGGAGCCCTTCCAGGTTTGAATGGAGGTGGCTGGATGGCACCGTGCTGAAA	up	1.29011	0.236625	up	1.24871	0.221504
PCSK6	Gallus gallus partial mRNA for proprotein convertase PACE4 (PACE4 gene), clone chPACE. [AJ252171]	A_87_P037479	TGTTTGACCATTCCAATGAGGGTTTCAAGGGCTGGGAGTTCATGACGGTGCACTGCTGGG	up	1.29004	0.162348	up	1.29311	0.175803
CN219448	WLA006D09.ab1 WLbrain Gallus gallus cDNA 5', mRNA sequence [CN219448]	A_87_P020833	AGTATTTATTGCTGACGTTCCCTCTGTGATGGCTCAAAGAGGTGCTGGCTCTCCCCAGCC	up	1.28991	0.147912	up	1.28516	0.141777
LOC396411	Gallus gallus Jun-binding protein mRN, 3' end. [L13234]	A_87_P009505	CACCAAATTCAACGCCGACGCCTTCGAGGAAATGGTGGCCCAGAAACGTTTGATCCCTCG	up	1.28984	0.193139	up	1.21902	0.331844
CN228280	RJB052F02.ab1 RJtestis Gallus gallus cDNA 5', mRNA sequence [CN228280]	A_87_P020694	AAGGAAGCCAGGTTCGGGGACTACAACGCCGTTGTGGTGGAAGTCTCAGGAGAAGCCTTT	up	1.28981	0.118115	up	1.18288	0.219208
NES	cytostructural gene {3'region} [chickens, embryo, mRNA Partial, 1711 nt]. [S52130]	A_87_P009200	GATCCCACACTCGTGCTGGGTTCAGCCTCATTTTGTACCCCAGGTGCACTCTTTACTGCA	up	1.28975	0.0153782	up	1.08792	0.348102
AJ444622	AJ444622 dkfz426 Gallus gallus cDNA clone 42g9r1, mRNA sequence [AJ444622]	A_87_P037345	ACAGCAGCCACCACTCGCGCTTGCTTCATCAGTGATTACTTATGGAGCCTGGTGCCCACA	up	1.28964	0.258119	up	1.24238	0.142622
NFIL3	Gallus gallus bZIP protein E4BP4 mRNA, complete cds. [AF335427]	A_87_P037676	ATCTGCAGAGGTTGCTTCACTTAAAAGACTTATAACTACACAACAAATTTCTGCATCAGA	up	1.28917	0.00990121	up	1.41789	0.0779712
TH1L	Gallus gallus mRNA for hypothetical protein, clone 24d13. [AJ720726]	A_87_P036221	TGTTAAACAAATAGTATAAACAGTATAAATCTGAATATTCTGAAGAGGGCAGCAGGAGGC	up	1.28911	0.207156	up	1.19094	0.351771
NDUFA12	Gallus gallus finished cDNA, clone ChEST194a9. [BX933367]	A_87_P023064	AAAGTGATTTGCCTCCACTTTGGCTTTCAGTGTAAATTGCATTGTCACTGGTTTTATTTA	up	1.28889	0.236355	up	1.15809	0.515357
ATF6	Gallus gallus finished cDNA, clone ChEST222o13. [BX931991]	A_87_P023703	CATCATTATTCAGACACTTCCAACACTTGTGCCACTGCCAAAGCATCAGCCAGTTGTTAA	up	1.28858	0.308277	up	1.12259	0.736843
CO770890	testis_EST01987 Testis cDNA Library Gallus gallus cDNA 3', mRNA sequence [CO770890]	A_87_P019255	CAATAGAAGCGGTCTATTGTAAGCTGCCTTTACCATGGCTACAGTCAGAATCTAGCTACA	up	1.28848	0.236245	up	1.39174	0.160086
TF	Gallus gallus TFEW mRNA for ovotransferrin BB type, complete cds. [AB215094]	A_87_P038040	TTATACTGTGATTTCCAACCTCAAAACCTGCAACCCATCAGATATCCTCCAGATGTGCAG	up	1.28848	0.144822	up	1.24986	0.112196
GJA8	Gallus gallus mRNA for mouse lens connexin (Cx50) homologue, partial cds, clone CLFEST47. [D26333]	A_87_P009797	GTGGTGGCTGCTGTGTCCCTCTTCCTCAACCTGGTGGAGATCAGCCACTTGATCCTGAAA	up	1.28844	0.483575	up	1.13253	0.762117
CR407345	Gallus gallus finished cDNA, clone ChEST808j8. [CR407345]	A_87_P012136	GGAGCTGCTGATAATGGCTTATGCACTGAAGACTTCCTGTGCCAGGAACATCATCGGGGT	up	1.28843	0.200406	up	1.49467	0.0595572
TC207227	HHCH90 heat shock protein 90 - chicken {Gallus gallus;} , partial (14%) [TC207227]	A_87_P004146	CTGGTCCAAGGGATTCGTGGATTGCACTCTACCATTAGAATTAGAATCCACTGTAAATCT	up	1.28828	0.0309102	up	1.22136	0.0630364
PTRF	Gallus gallus mRNA for leucine zipper protein, complete cds, clone:CFLEST58. [D26315]	A_87_P009800	CTGCTCCTCCCCGCGCAGCCGGGACTGCTGCTGACATAACCACGTATATAAACTTGCTTT	up	1.28827	0.0583667	up	1.20643	0.198175
MYO5A	G.gallus mRNA for p190 myosin heavy chain. [Z11718]	A_87_P008712	TAGCATGTCCGATGTTTTTCTTTGTTTGTAGACCCCAGGGATGACAGTGTGTATTTTCAG	up	1.28814	0.0252351	up	1.07736	0.523518
RPN2	Gallus gallus mRNA for hypothetical protein, clone 2o15. [AJ719504]	A_87_P037047	GCTGGCTCAGAAAGCAGTAAAACGGACACACTAGCACCAGAAGAATGGAAGAAATGGGGA	up	1.28809	0.128286	up	1.16982	0.346876
LOC423991	Gallus gallus finished cDNA, clone ChEST542j8. [CR352990]	A_87_P018234	GTGTGGACATGAATGAGCATCATCCTGGTAGGAAACTGGAGCGAGAGAAAACCTTCATTA	up	1.28802	0.645957	up	1.53594	0.459133
NKIRAS2	Gallus gallus mRNA for hypothetical protein, clone 15a13. [AJ720318]	A_87_P036491	GCGTACGTTGATCGAGCCCTTCATCTACCTGGCCAGTAAGATGACGCAGCCACAGAGCAA	up	1.28785	0.0672013	up	1.17583	0.383218
RCJMB04_22h21	Gallus gallus mRNA for hypothetical protein, clone 22h21. [AJ720640]	A_87_P036274	GAGACCTCTTCATGTCATTCAGGAGTATTGTTCCAAGATGTCAGAAATGCTGGTGACTGG	up	1.28775	0.634806	up	1.71727	0.344475
AJ719536	Gallus gallus mRNA for hypothetical protein, clone 3c18. [AJ719536]	A_87_P037028	TGAGCTGTAGCTGCTGGGGCTGATATTCAACTATGCCTTTGTCACTGTAGAGATGGAATA	up	1.28761	0.0349179	up	1.16634	0.24925
HBA1	chicken alpha-globin mrna. [J00851]	A_87_P009555	ACACAGAGGTGCAACCATGGTGCTGTCCGCTGCTGACAAGAACAACGTCAAGGGCATCTT	up	1.28759	0.593165	up	2.83473	0.0645594
BX950723	Gallus gallus finished cDNA, clone ChEST201a8. [BX950723]	A_87_P021493	CACCGCTACCGCCTGCAGCTCCGTGAAGAATAAAACCCAGCCACCGAGCAAAAAAGCTAT	up	1.28729	0.36361	up	1.22295	0.586412
GATAD2A	Gallus gallus mRNA for hypothetical protein, clone 39e8. [AJ851822]	A_87_P035520	CTGCAAAATTAGGAACCCAGCAAAACACACAGATAGTCATGCCACCCCTTGTCAGAGGAG	up	1.28726	0.117672	up	1.14978	0.442025
CD215709	pgp2n.pk008.k3 Normalized chicken pituitary [CD215709]	A_87_P021380	TTCCCTTCTCCATTCCGTGCTGCTGGATAATAGGGATTCAGCGCGATCCTCAATGCTGCC	up	1.28725	0.659129	down	1.03805	0.956966
MARK1	Gallus gallus finished cDNA, clone ChEST520k1. [BX950636]	A_87_P021538	TGCACAGAAATGTATGTTCGATGCTTTGAGTTGGAGAAGTTCTTCCCTATCATTTACATT	up	1.2872	0.0524786	up	1.02276	0.885837
BMPER	Gallus gallus crossveinless-2 mRNA, complete cds. [AY731507]	A_87_P035063	TGTGTATATAGATACACGTATCTATACACAAGTGCCCTAAACCTAAGTACAACCCATATA	up	1.28718	0.271944	up	1.29243	0.330418
TCF4	Gallus gallus mRNA for transcription factor Tcf4, partial cds. [AB040438]	A_87_P038161	AAAGTGCGTTCGCTACATACAAGGTGAAGGCAGCTGCGTCAGCCCACCCTCTTCAGATGG	up	1.2871	0.0779881	up	1.24215	0.216695
EBNA1BP2	Gallus gallus finished cDNA, clone ChEST932p11. [CR353807]	A_87_P017714	AAGTCTGAGAAAGCGAAACAGCTCCGTGCAATGAGAAAATATGGCAAGAAGGGACAAACA	up	1.28709	0.0845985	up	1.05372	0.649516
TRAP1	Gallus gallus mRNA for hypothetical protein, clone 2d7. [AJ719428]	A_87_P037099	ATACAGCAATAACAGCTAAAACAGAATGCATAAAATTCTGACACAACCCTTGAGAACCTC	up	1.28702	0.101892	up	1.09569	0.62344
CN233362	RJA110C02.ab1 RJbrain Gallus gallus cDNA 5', mRNA sequence [CN233362]	A_87_P020531	TCTCCGGCGTGTTCCGTGTGGCTGTACAAAGCGGACGAGTGAAGCCCTCGCTTATTAAAG	up	1.28683	0.39152	down	1.08792	0.812079
CR391101	Gallus gallus finished cDNA, clone ChEST206i6. [CR391101]	A_87_P013725	TCGATGAAGAACTGCATTCAGTTGGCAGCATGTGAAGCTAATGAATTGCTCCCTATGATC	up	1.28648	0.122778	up	1.57112	0.00529428
CR353311	Gallus gallus finished cDNA, clone ChEST350c23. [CR353311]	A_87_P018022	GGGCATCAACAGACAATCTATCTCCAACTTCCACATGTTGCTGTTGCAGACAGAGACCCG	up	1.28646	0.0208867	up	1.20084	0.02776
CR338982	Gallus gallus finished cDNA, clone ChEST957i6. [CR338982]	A_87_P018696	TGCAGGGAGAGCATTTCCATGCTCACCTCAAGGTCTGGTTCGGTGACGTGGAAGCAGAGA	up	1.28629	0.882258	down	1.08976	0.958647
LOC421949	Gallus gallus mRNA for hypothetical protein, clone 31l4. [AJ720980]	A_87_P036031	TGCCTGCTGTGATGTTTTTGTACAGAAGTTTGTTGGAAATAATAAAAAGTTTGGTACAGG	up	1.28617	0.0369414	up	1.24543	0.125341
RCJMB04_3k21	Gallus gallus mRNA for hypothetical protein, clone 3k21. [AJ851470]	A_87_P035753	TCATGGGATTGGGAACTCCTAATTTAATTGGTTTCTTTCTGATTTATCAGATGTAACTGC	up	1.28614	0.68867	up	1.32349	0.683396
GPR143	Gallus gallus finished cDNA, clone ChEST659i6. [BX950829]	A_87_P021430	CAGGGATCTATGTTACTTATGATTCATCTGTTTTCTTTCAATCTCTCCTGTAACCTCCGT	up	1.2861	0.342531	up	1.36234	0.36286
CO769523	testis_EST00620 Testis cDNA Library Gallus gallus cDNA 3', mRNA sequence [CO769523]	A_87_P019393	ATTGAAAGATCAAGATACTTTGACTCAGCATGGGATTCACGATGGACTCACTGTTCACCT	up	1.28554	0.469179	up	1.4858	0.258236
CN233732	RJA116H11.ab1 RJbrain Gallus gallus cDNA 5', mRNA sequence [CN233732]	A_87_P020527	GCTTTTCTTAGGGAGTTCCTATGGGACTTTTAGAGAAACGAGCACTGATCATTGCTCCCT	up	1.28501	0.0554319	down	1.1043	0.443444
CV861040	gonad_EST08516 Embryonic gonad cDNA Library Gallus gallus cDNA 5', mRNA sequence [CV861040]	A_87_P010130	TGTTTCTGTAACTGAAATACTGCATTTAGGAACTGTCAAAGGGGAGATCACTTTAAGGGG	up	1.28491	0.239634	up	1.36466	0.236805
CV860328	gonad_EST07819 Embryonic gonad cDNA Library Gallus gallus cDNA 5', mRNA sequence [CV860328]	A_87_P010259	TACGTGGAATGTCCAACGTTAACTCAAATGTGAAATCGTCATAATAAATGCCCATGCGGA	up	1.28484	0.0286164	up	1.22353	0.172156
SMAD9	Gallus gallus TGF-beta signal transducer Smad8 mRNA, partial cds. [AF230193]	A_87_P037758	TGCTGAATGTGTCAGTGACAGCAGTATTTTCGTGCAGAGCCGCAATTGTAACTATCAGCA	up	1.28476	0.0599285	up	1.53572	0.0156501
BX932440	Gallus gallus finished cDNA, clone ChEST640b9. [BX932440]	A_87_P023497	TGCCGGGCGGAGGAGAGCCCTCACTCCACGCATCCCTTCTTTGTTCCTATCCTAAGCTCC	up	1.28466	0.0517255	up	1.2428	0.0109828
RHBG	Gallus gallus Rh type B glycoprotein RhBG mRNA, complete cds. [AY139091]	A_87_P035262	AGAGGTGCCACACACCAGCTGTGGTCTGTGCCTTCAGCTTCTCCACCTGACATAAGGGAA	up	1.28404	0.316396	up	1.45451	0.217919
ZNF335	Gallus gallus finished cDNA, clone ChEST666d12. [CR407536]	A_87_P012005	CGCGTTTCCTCACGCACGAAGATCTGCGTTTCCACGTCAACTCACACGAGGCCAACGACC	up	1.28347	0.332672	up	1.29954	0.359017
CTAGE5	Gallus gallus finished cDNA, clone ChEST988j9. [CR523487]	A_87_P011574	GCGAGGTTCAAAAGCTGCAGCAGAAACTTAAAGTTATGACTGAGCTTTATCAAGAAAATG	up	1.28329	0.167802	down	1.17913	0.336508
CV859773	gonad_EST07249 Embryonic gonad cDNA Library Gallus gallus cDNA 5', mRNA sequence [CV859773]	A_87_P010360	CCTTTCCCTTCTTCCCTCCCAGGTACATATTGTGTGGTACTATTTTTGCCTGCATAATAC	up	1.28266	0.306285	up	1.74348	0.0180187
LOC417984	Gallus gallus finished cDNA, clone ChEST368k4. [BX930627]	A_87_P024225	AGAGCTGGGAATCAGCGAGAAGTCCCCCAATTACCGCAATCCCTTCAAAGCTGACCACTC	up	1.28259	0.0582358	up	1.16505	0.109661
UNC84A	Gallus gallus finished cDNA, clone ChEST867m14. [CR406348]	A_87_P012843	AAGAGCGAGATAGGACTTTGTGCAATGTATTTTTGTAAATGCTTTTCAAATGGTCTGTTC	up	1.28257	0.547309	up	1.21206	0.69349
CR387017	Gallus gallus finished cDNA, clone ChEST808i15. [CR387017]	A_87_P016093	AGCCTTGAGCAGACCATAAAGCAGCTGGAAAACACCATCAGTGAAATGAGTCCCAAAGTT	up	1.28248	0.212043	up	1.56819	0.11345
LOC418664	Gallus gallus finished cDNA, clone ChEST264h12. [BX931250]	A_87_P024000	CTCAGTGATGCATCAATTAAGAAGCGTCAGCTTGAAAGGCAGAAGCTTCAGGAGCTTGAA	up	1.28225	0.0837857	up	1.01714	0.95397
CR386155	Gallus gallus finished cDNA, clone ChEST353l22. [CR386155]	A_87_P016672	AGAGGCAGCAGCAGAGTCTACTCGGCACATGGAGGCTGGTGCAGGCAGAGCCAGCTACAT	up	1.28217	0.0552397	up	1.16272	0.358713
LOC395819	Gallus gallus px19 mRNA, complete cds. [U31977]	A_87_P009099	GACGCAGGCAAGAGCTGGGCTATGCAGAACAGATAGGAGCCTCCTTAGATTTTATATTTT	up	1.28199	0.0119538	up	1.14997	0.0482987
TC226214	Q08514 (Q08514) Gallus gallus POL-like (Fragment), partial (19%) [TC226214]	A_87_P000761	GGTAAGTTGATCACTGCTGTGTCTCCTAAAATCACAGTCCATGTCTGCAATGTTAACATG	up	1.2819	0.706057	down	1.58393	0.388436
GNT-VI	Gallus gallus GnT-VI mRNA for N-acetylglucosaminyltransferase VI, complete cds. [AB040608]	A_87_P038160	GATATTACCTCCCAGACACGCTGCAGTCCCTCTTCAAGCAGTCATCAGAGGAGGAGCTGC	up	1.28125	0.635159	up	1.32155	0.643014
RCJMB04_29d24	Gallus gallus mRNA for hypothetical protein, clone 29d24. [AJ851768]	A_87_P035554	GAGGCATGGAACCCTACCAGGTGTTTATTAATGTAACGTAACATAGCTCATATTCTGCAT	up	1.28118	0.0117827	up	1.22334	0.0150893
CR385864	Gallus gallus finished cDNA, clone ChEST203i2. [CR385864]	A_87_P016868	AAGAGATTGCACCAGCGGCAGATAGCTGTGCAACCCTGTTCTGTGTCAATAGTGTAAATA	up	1.28117	0.748914	up	1.35749	0.678093
LDLR	Gallus gallus mRNA for low-density lipoprotein receptor precursor (LDLR gene). [AJ515243]	A_87_P037249	TGTGACACAGCCCTGAGTGTGCAACACCAGCACTGAGTGTGCGACACAACGAGTGTGCAA	up	1.28108	0.023929	up	1.13264	0.0951911
RCJMB04_32j6	Gallus gallus finished cDNA, clone ChEST133c11. [CR353531]	A_87_P017879	GTCCATAAAGTAGAACCAATTATTAAACATATAGGGTTAAGTGTATAGTGGTATGGGTCC	up	1.28036	0.104417	up	1.16482	0.259143
CR352546	Gallus gallus finished cDNA, clone ChEST840f13. [CR352546]	A_87_P018520	AACTTAAATGAATTTACAGAGCATGTTGACACTCAGCATCCGAATGTCATTCTCAACCCC	up	1.28031	0.318388	up	1.10621	0.709347
SFRS14	Gallus gallus finished cDNA, clone ChEST688c17. [CR391045]	A_87_P013761	CTGCCTCGGGGTGGCATGGCTTCTCATGATCAGGACTATGGACATCCTGACTCTTGGGAA	up	1.27988	0.643434	up	1.1116	0.820477
MMP115	Gallus gallus mmp115 mRNA for 115-kDa melanosomal matrix protein, complete cds. [D88348]	A_87_P009762	AGGACTTCAACCAGTCCGGCCTCTACTGCCTCAACGTCTCGTTGGCCAACGGCAACGGCT	up	1.27916	0.221928	down	1.09765	0.589678
USP24	Gallus gallus finished cDNA, clone ChEST516j1. [BX933263]	A_87_P023130	GCGGACGTTCTATTAAATATGATGAACAAATAAGGTTCCCCTGGATGCTGAACATGGAGC	up	1.27914	0.624222	down	1.02407	0.969437
TMEM41B	Gallus gallus mRNA for hypothetical protein, clone 25c20. [AJ720768]	A_87_P036192	CTTACAACAGCAGGGGAAGCTGTTTCCTGGAACTCTCTTTTGTTCTCATGATTCTAGCCA	up	1.27905	0.0153411	up	1.23328	0.124324
FAT3	Gallus gallus clone 3 fat3-like mRNA, partial cds. [AY355447]	A_87_P035194	AAACAATAGCCCACTTCCACTTCCACGTGCATGTTAGAGACAGTGGAAATCCTCAGCTTA	up	1.27899	0.682697	down	1.03416	0.967726
DNMT3B	Gallus gallus DNMT3B mRNA for DNA methyltransferase 3B, complete cds. [AB214887]	A_87_P038042	CATCCTCTGTTTCATGTGCTGGATCTCACCTCCCTTCAGTCTGATCAAAAGGAAAAGAGA	up	1.27871	0.510602	up	1.25361	0.567329
LOC418733	Gallus gallus finished cDNA, clone ChEST625e17. [BX930375]	A_87_P024328	AGATCATGTCCCCAGATTCAGAAAAGTCAGTTCAGGCTGTGTCTCCAGATCCAGAGAAAT	up	1.27857	0.747382	up	1.21993	0.825913
GRB2	Gallus gallus growth factor receptor-binding protein 2 (GRB2) mRNA, complete cds. [L19258]	A_87_P009495	AGGAACCAGCAAATATTTCTACGGGATATCGAACAGGTGCCACAGCAACCAACCTATGTT	up	1.27853	0.411386	up	1.02652	0.932998
SREBF2	Gallus gallus partial mRNA for sterol regulatory element binding protein 2 (SREBP-2 gene). [AJ414379]	A_87_P037394	CTATTCCATTGATTCAGAGCCAGGAAGCCCACTCCTTGATGATGCAAAGGTTAAGGATGA	up	1.27825	0.0875626	up	1.31012	0.112196
CR352857	Gallus gallus finished cDNA, clone ChEST493p9. [CR352857]	A_87_P018320	TGCAGTATCCCTGCCCCTGGCGGAGTGCCCTGAACTGCACTCACTGGAAGGACATTAAAA	up	1.27823	0.137782	up	1.23639	0.206529
BX935428	Gallus gallus finished cDNA, clone ChEST503e10. [BX935428]	A_87_P022151	CTCACTGCATTCCAGAAAGCCCACGAAGAACTCTTTGCAGAACTGCAAAAAGCAGAAGAT	up	1.27787	0.103471	up	1.14975	0.359017
AJ719446	Gallus gallus mRNA for hypothetical protein, clone 2h6. [AJ719446]	A_87_P037086	TGAGGTTGCTCCAGTTTGTCAGATGGGTTTCGTTCAATTCAGTTTTGTGCTTTGGATAAC	up	1.27769	0.59101	down	1.06115	0.842591
CYTL1	Gallus gallus finished cDNA, clone ChEST657d11. [BX931297]	A_87_P023980	TGCTGGTAACTTTTGATATCAGACTTGTAAGAATAGAAATGAAAGTATCTTGCCTGAGTG	up	1.27731	0.112254	up	1.08365	0.601037
RCJMB04_4o13	Gallus gallus mRNA for hypothetical protein, clone 4o13. [AJ719645]	A_87_P036951	CACCAAAAGACGAGGACATAACAGACAAGAAAGAGGCAAATACTTTAGAACAAGTGACTT	up	1.27706	0.630037	down	1.11503	0.857882
KIF2C	Gallus gallus finished cDNA, clone ChEST891c14. [CR391626]	A_87_P013326	GCAATGATTTCTCCAGGCATGAGTTCATGCGAGTACACCTTAAACACACTGAGATACGCT	up	1.27703	0.256957	up	1.70177	0.045106
LOC422819	Gallus gallus slit-2 mRNA, partial cds. [AF387319]	A_87_P037647	GCACCTTCGAGTTCTTCAGCTCATGGAGAACAAGATTAGCACTATTGAGAGAGGAGCATT	up	1.27688	0.300328	up	1.41413	0.211883
BG710819	pgl1n.pk005.e15 Normalized Liver Library Gallus gallus cDNA clone pgl1n.pk005.e15 5' similar to gi [BG710819]	A_87_P034962	GACAGGAGATGCATCCTGAACAGGTGGGTACCTGTGCTCCTTCCTCTTACTGTCCCAGCT	up	1.27687	0.156191	up	1.19082	0.29266
LOC417031	Gallus gallus finished cDNA, clone ChEST745g24. [CR407176]	A_87_P012250	CCAGATCTTCCGCAGGAATGAGACGCAGGTCCATGATGTGGACTCCATGGTCCGTCTGAT	up	1.27682	0.111257	up	1.15227	0.300905
CV862196	gonad_EST09312 Embryonic gonad cDNA Library Gallus gallus cDNA 5', mRNA sequence [CV862196]	A_87_P009953	ACCCAAATAGAAAAATTCCAGGAGAAGGCACAGATGGAATTACAGGACTATGTGCAAAAA	up	1.27656	0.46217	up	1.44844	0.302876
CR390491	Gallus gallus finished cDNA, clone ChEST445g12. [CR390491]	A_87_P014116	CAACAACATACGATACTGCAATAGCAATGTCTCAGACCTGGAACACTGTCATACGTGATA	up	1.27639	0.223952	up	1.10092	0.700911
V00405	Chicken messenger RNA fragment for fibronectin (probably transformed by a cloning artifact). [V00405]	A_87_P008986	GTCCTGATTCTTTCTCCATGATCCTGTAGCTTTAGTATCTCATACTGTTATTTATCAGTT	up	1.27635	0.0682506	up	1.20615	0.0683219
COMP	Gallus gallus thrombospondin-3 (THBS3) mRNA, partial cds. [L81165]	A_87_P009418	CAGGACAGCGGCAGTTTCTACGTGGTGCAGTGGAAGCAGACGGAGCAGACCTACTGGCAG	up	1.27612	0.0393348	up	1.33506	0.0496976
PTK7	Chicken KLG gene, complete cds. [M63437]	A_87_P009316	AGGGTACCGCAGCCAAGAATGGTTGGGTTTTTGTTGGGTTTATATGTGCTGCTCTCAATA	up	1.27586	0.0259122	up	1.18558	0.0875186
BOK	Gallus gallus Bcl-2-related ovarian killer protein mRNA, complete cds. [AF275944]	A_87_P037731	GGGGACCAAGAAGGGAGGGAAGGGAGCTTATTGGATTTTGGAAAACGGGGAATGGGGAAA	up	1.27555	0.659741	down	1.00441	0.994783
SLC2A8	Gallus gallus GLUT8 mRNA for glucose transporter type 8, complete cds. [AB083371]	A_87_P038114	AGAGCTGAGGAAAATCGACAATCCGAAATTACGATTGGACAGCAATCAGGCATCGTGGTT	up	1.27547	0.150513	up	1.293	0.16016
CR352709	Gallus gallus finished cDNA, clone ChEST1008p24. [CR352709]	A_87_P018417	GAAAGCGCTAGCTTGCCAGTCTGTTAGCCATACTGAATAAACATCTGACTTGCTTTCAAC	up	1.27544	0.126842	up	1.14218	0.35099
LOC426861	Gallus gallus finished cDNA, clone ChEST506k22. [CR523732]	A_87_P011410	TTTTCAGGACTGCAGAAACTGTTAGCGGCTGTGAATTATATCCTTGAAGGAATTTGTAGA	up	1.27531	0.470322	down	1.00536	0.993689
SLC25A37	Gallus gallus finished cDNA, clone ChEST447e11. [BX934236]	A_87_P022678	ACTTTATTTTGGAGAGCCGAAATAATTGATATTTTTGTTTTTTCTCTAAGCTTGAAGTTG	up	1.27529	0.181324	up	1.37215	0.13442
BX934816	Gallus gallus finished cDNA, clone ChEST561f16. [BX934816]	A_87_P022397	AGGCTGGGGCCCCACTCTCCAGTGTGAACTGCACCAGATTAAAGAAGCAAACTCGATGGC	up	1.27529	0.0589015	up	1.15292	0.0699103
REEP1	Gallus gallus finished cDNA, clone ChEST220m9. [BX931996]	A_87_P023699	ATACACAAAAGGCTCCAGCCTGCTGTACAGGAAATTTGTTCACCCAACGCTGTCTTCAAA	up	1.27527	0.345933	up	1.48367	0.203895
CEBPB	G.gallus NF-M transcription factor. [Z21646]	A_87_P008706	CGGCCGCGTTTTCGGTTTCGTTGGGGGTTTCATTGTTGTTGTTTGTTGTTGTTTGTTGTT	up	1.27462	0.0828435	up	1.3769	0.0367919
CR387181	Gallus gallus finished cDNA, clone ChEST786i18. [CR387181]	A_87_P015994	TGAATTTCTCTGAATAATGAGATTGTCAGGAACGAACTCCAAGAGTATGCAGAAATGAAT	up	1.2746	0.237312	up	1.24391	0.324651
NFKB1	Gallus gallus mRNA for NF-kB p50 subunit, complete cds. [D13719]	A_87_P009815	CAGGACCTAAAGACATGGGTTGTTGGGTTTGCAAACCTTGGGAATACTTCACGTCACAAA	up	1.27454	0.74523	up	1.1439	0.874634
AJ393871	AJ393871 dkfz426 Gallus gallus cDNA clone 17c6r1, mRNA sequence [AJ393871]	A_87_P037427	ACTTTGTGGCCAGACCTGAGGACTATTCAAATATGCTCTTCATCTGTCGCATAGTGGACT	up	1.27433	0.730559	up	1.04091	0.959377
RCJMB04_6b10	Gallus gallus mRNA for hypothetical protein, clone 6b10. [AJ719751]	A_87_P036882	TATTAAAACGTTTCGTGTTACTTTCTAACTGGATTACACCCTGGATTGAGAAGTCTTCCT	up	1.27379	0.0161915	up	1.24823	0.0869803
CN236254	RJB139F08.ab1 RJtestis Gallus gallus cDNA 5', mRNA sequence [CN236254]	A_87_P020473	ACCATAGGGCTCAGCCCGAGCCCCACCGCATCGATAATAAAGCCGCACACCCACAGCAAA	up	1.27375	0.0266341	up	1.20363	0.0640755
CR523620	Gallus gallus finished cDNA, clone ChEST330m23. [CR523620]	A_87_P011494	GCAGTTCTCCCCAGCTTATATAATGAAACAAAGGTCAGAAGAGAACTCATCCGAGAGGTA	up	1.27374	0.481916	up	1.26058	0.54922
BI394831	pgp1n.pk010.e18 Normalized Chicken Pituitary [BI394831]	A_87_P034899	ACCAGAGCAACGTCACCCACCTCAACAACGAGAACCTGAAGAAGTCGCTCTCCTGCGCCA	up	1.27355	0.698037	up	1.24662	0.750841
AJ392696	AJ392696 dkfz426 Gallus gallus cDNA clone 12i15r1, mRNA sequence [AJ392696]	A_87_P037441	TGACTGCTGAGTTCCATCGGCGCTTCTCCGGCTGCTCTGACCTCTGAAAGCATACAGACA	up	1.27351	0.0284637	up	1.10755	0.292652
LOC422662	Gallus gallus finished cDNA, clone ChEST135a15. [CR407497]	A_87_P012035	AGGTGGCAGAAGAGACAGTGGCAAGGATCCTCCACCACACCTCCTTCCAGGAGATGAAGA	up	1.27345	0.0409964	up	1.15024	0.185817
BM490399	pgp2n.pk003.e7 Normalized Chicken Pituitary [BM490399]	A_87_P034842	AAACATGAGAGAAATCACTGTCTTTAAATGTAGGAATCTGCAGCTGAACTGGTGGGGGAG	up	1.27296	0.175061	up	1.23193	0.206529
RCJMB04_1o1	Gallus gallus mRNA for hypothetical protein, clone 1o1. [AJ719393]	A_87_P037119	GAAAGAACAATCTCACTTCTTCTCAAGCACTGTTTTGTTGCCTGCTCTTAAGCTGCCCAA	up	1.27278	0.830012	up	1.40981	0.763333
BX932022	Gallus gallus finished cDNA, clone ChEST891l5. [BX932022]	A_87_P023690	GTTCACATTGAACGCTTGAAGAACAAAATCACAGTGACATCGGAGAAGCAGTTTTCTAAA	up	1.27278	0.0994677	up	1.0462	0.751667
BX931515	Gallus gallus finished cDNA, clone ChEST388a8. [BX931515]	A_87_P023898	TGGACTTATCGATAAACAAAGCCAGGTCATCCCCTACAGCAGCTTCATCTTCACCAGTTT	up	1.27277	0.364616	up	1.04715	0.847443
UBAP2L	Gallus gallus finished cDNA, clone ChEST45f5. [CR353229]	A_87_P018081	ACGAGCGCTGCTGTTAGCCAACCTCAGAGCAGCCTGTACACCAGCACTGCTAGTGAATCT	up	1.27254	0.104002	up	1.23845	0.139641
LOC396468	Chicken NA,K-ATPase alpha-2-subunit mRNA, complete cds. [M59959]	A_87_P009327	GTACAGTCTGCTCATCTTTGCCTACGACGAAGTGCGCAAACTTATCCTGCGCCGCTACCC	up	1.2723	0.809263	up	1.63117	0.590628
LOC423784	Gallus gallus finished cDNA, clone ChEST502c4. [BX935366]	A_87_P022169	AAGACATTTTATGACCCAGAAACTGGCAAATATGTTCAGGTCTCAGTCCCTTCCTCAGAA	up	1.27212	0.696009	up	1.2215	0.763475
CR385287	Gallus gallus finished cDNA, clone ChEST550l8. [CR385287]	A_87_P017217	TGGCGTCGTGGATTCGTTGACGTCGTCTCCGTGAATACAAAGGACCAAAGATGCTCTGAC	up	1.27189	0.0187085	up	1.15989	0.186967
BX950358	Gallus gallus finished cDNA, clone ChEST255o18. [BX950358]	A_87_P021665	TCACGTGCCACAACATCAAAGATGTGAGCAACAGCGGAGCCCTCTGCCTGCGGCTCAACG	up	1.27187	0.454609	up	1.23427	0.495671
MYBPH	Chicken myosin binding protein-H (MyBP-H) mRNA, complete cds. [L05605]	A_87_P009526	CTGGGTCCTGCGTGTTGTCCTGGCCATGGCATGGCCCTCTCTAGGTGTGTTTTTATCTGT	up	1.27147	0.0178903	up	1.38154	0.0109828
BX930487	Gallus gallus finished cDNA, clone ChEST595b19. [BX930487]	A_87_P024275	TGGAGGGGATATGTTTGATTACATCATGAAGCACGAAGAAGGTCTGAATGAGGATCTGGC	up	1.271	0.414275	up	1.17627	0.618911
CN234381	WLB026C03.ab1 WLtestis Gallus gallus cDNA 5', mRNA sequence [CN234381]	A_87_P020513	GGAAGCAATGCTCTCTCTGATCTGCAGTGAGGCCGTGTCTGTGCCCGCTCAGCTCCATGC	up	1.271	0.414079	up	1.09736	0.798706
RCJMB04_22h1	Gallus gallus mRNA for hypothetical protein, clone 22h1. [AJ851730]	A_87_P035582	GTGGATCCTGACAGCACTGACAGCAAGCTGGTGTTCAACCGGACTGTGACGCTGAAGGAG	up	1.27087	0.106259	up	1.14796	0.387374
RCJMB04_2l21	Gallus gallus finished cDNA, clone ChEST53h23. [BX933592]	A_87_P022946	AGAAAATGGGAAAAATATACTGTACTGTCATGAAAGAGTGGCAGGAGTAGCAATGGGACT	up	1.27078	0.0310957	up	1.53442	0.0203713
ITCH	Gallus gallus finished cDNA, clone ChEST954m10. [BX935223]	A_87_P022209	GGAGCTATGCAGCAGTTTAATCAGAGGTTTATATATGGGAACCAGGACTTTTCTTCCACT	up	1.27054	0.484469	up	1.39461	0.401735
X03832	Chicken mRNA 3' end for fast skeletal troponin I (sTnI). [X03832]	A_87_P008976	AGACTAACAAGGAGCTGGAGGACCTGAGCCAGAAGCTGTTTGACCTGAGGGGCAAGTTCA	up	1.27029	0.174066	up	1.31813	0.217337
BRI3BP	Gallus gallus finished cDNA, clone ChEST596e16. [BX932476]	A_87_P023480	CTCAGCCATTATACTTGTAGGAAAGAGAATTAAGCCGTATATTCAGAGTTTTATCCAGTA	up	1.27028	0.217008	down	1.5276	0.708316
STXBP1	Gallus gallus syntaxin 1-binding protein mRNA, complete cds. [AY509605]	A_87_P035152	CCGCCTCATTATTTTCATCCTTGGGGGCGTGAGCCTGAATGAGATGCGCTGTGCCTACGA	up	1.27017	0.342377	up	1.09999	0.779234
ATP6V1G3	Gallus gallus finished cDNA, clone ChEST475d11. [BX932779]	A_87_P023361	GATAGTTCCTCCTCCATTGTTTCTGAATGTGTTAGAGAAAACAATAAAGCCAGAAGTGTA	up	1.27012	0.0544287	up	1.14077	0.190151
CR386726	Gallus gallus finished cDNA, clone ChEST31m6. [CR386726]	A_87_P016278	ACTGCTGTGGAAATTTCAGCCCAGAGACTTCAGTGCTAAACATGAGGGAGCAGTAAAAGA	up	1.27003	0.195958	up	1.3019	0.213479
LOC415479	Gallus gallus mRNA for hypothetical protein, clone 14o5. [AJ720313]	A_87_P036496	GGTAGTTTTAAGTTAAGCCTAGCTACAGTAAACTGCAAAATTCCGGTTTGTATATGATTG	up	1.26995	0.213333	up	1.1527	0.518718
RCJMB04_16m9	Gallus gallus mRNA for hypothetical protein, clone 16m9. [AJ720392]	A_87_P036443	AGTGCGTTACAGAGCCTGACTAGGAGCTACCATGCACACAGTCACCATTTTGATACATTT	up	1.26958	0.0369403	up	1.1226	0.240931
LOC418444	Gallus gallus finished cDNA, clone ChEST647b2. [BX931343]	A_87_P023971	ATTCCTGCGGTGCCTCATACAAAACAGAAAGCCAATTTCAGAAGCTCACCACTGTGAACA	up	1.26936	0.646773	up	1.22958	0.717929
LOC396507	Chicken creatine kinase (muscle isoform) mRNA, complete cds. [M10012]	A_87_P009417	GCTCCCCAAACTCAGCCAGCACCCCAAATTCGAGGAGATCCTCCATAGGCTGCGCCTGCA	up	1.26929	0.0151041	up	1.26475	0.0349948
RCJMB04_4m1	Gallus gallus aggrecan promoter binding protein mRNA, complete cds. [DQ126684]	A_87_P009694	AGCAGGAGTCAAGGTGGCTATGGAGACAGGTCTTCAGGAGGGTCCTACAGAGACAGCTAC	up	1.26909	0.00704707	up	1.25589	0.0554014
TC206127	S18159 ribosomal protein L7a, cytosolic - chicken {Gallus gallus;} , partial (21%) [TC206127]	A_87_P004575	AAGGGCACCCTTATCCTCCCTGTGGGGGAACAAGTTGAATGTCTTTAAAGCATCAGTTTA	up	1.26901	0.13428	up	1.27522	0.219126
HMOX1	Chicken (G. domesticus) HO-1 mRNA for haem oxygenase (EC 1.14.99.3). [X56201]	A_87_P008921	AGAGTCTTGGAGGAAGCCAAGAAAGCATTCCTGCTAAATATACAGGTGTTTGAGGCGCTG	up	1.269	0.0357077	up	1.4244	0.061523
AKR1D1	Gallus gallus finished cDNA, clone ChEST846d17. [BX934646]	A_87_P022491	GAGGAGTGGTCGTCATCCCAAAAAGCTTCAATCCACAACGCATCAGAGAGAATTTTCAGA	up	1.269	0.122549	up	1.07063	0.715136
RCJMB04_29m20	Gallus gallus mRNA for hypothetical protein, clone 29m20. [AJ720916]	A_87_P036074	TCGCATTACCCCATGCAACCATTACTTTCATGCACTTGTCTTTCGGAAGTGGCTGTACAT	up	1.26896	0.0651797	up	1.17106	0.270289
AJ444017	AJ444017 dkfz426 Gallus gallus cDNA clone 39f9r1, mRNA sequence [AJ444017]	A_87_P037356	CCGCACCATCTGCTCCTGGACACACGACGATGTTCTCAATGGGATCAGCGTGGAGGGCGA	up	1.2689	0.0610183	up	1.19552	0.136145
RCJMB04_9j5	Gallus gallus mRNA for hypothetical protein, clone 9j5. [AJ720021]	A_87_P036697	CATGGAAATTTCTTTGGGATATTTTCCTTGGAATAGCACTAAAGAAGAGAGAGCAAACTT	up	1.26867	0.220473	up	1.17103	0.465777
CR352934	Gallus gallus finished cDNA, clone ChEST401b1. [CR352934]	A_87_P018276	TTAACGTAACAGCCGTACTCAGATGGTGATGAGGATGATGATGAGGATGATGATGAATTG	up	1.26837	0.0152018	up	1.21217	0.0964642
BI393882	pgp1n.pk012.m18 Normalized Chicken Pituitary [BI393882]	A_87_P034909	AGAACGAGGTGACCTCAGCCGACAACCTGGACTTCCGTCACCACAGCTACAAGGACATGA	up	1.2682	0.0330745	up	1.30633	0.0301891
ACTN4	Gallus gallus mRNA for alpha-actinin, complete cds. [D26597]	A_87_P009795	ACACGGCCGACCAGGTCATCGCCTCCTTCAAGGTGCTGGCGGGGGACAAGAACTACATCA	up	1.26787	0.234337	up	1.13579	0.540366
LOC424750	Gallus gallus finished cDNA, clone ChEST590p4. [BX930310]	A_87_P024365	AGTGATGATGATGAGAAAGAGGAGGAGAAGACAGTGAAGAGGAAAACAGCTATCCTCTCT	up	1.26764	0.125098	up	1.01935	0.924262
HES1	Gallus gallus c-hairy1B (hairy1) mRNA, complete cds; alternatively spliced. [AY225440]	A_87_P035240	GAACCGACCGAAGCTCTCTCCCCTAAAGTCTATGGGGGTTTCCAGCTCGTCCCGGCCACT	up	1.26758	0.114022	up	1.0849	0.555781
CO773246	testis_EST04343 Testis cDNA Library Gallus gallus cDNA 3', mRNA sequence [CO773246]	A_87_P019011	CCAGAAGCGGAAGAGAAAGAAAGCGAAAGGGGACGCAGCGAACCCGGAACCAGAAACTGT	up	1.26747	0.0113037	up	1.17446	0.0911986
BX933090	Gallus gallus finished cDNA, clone ChEST906d20. [BX933090]	A_87_P023206	TGACCTTTGGAAAGAGAAAATGCTTCAGGACACCAAGGATATTATGAAAGAGAAGCGGAA	up	1.26739	0.422876	up	1.26587	0.353997
OGCHI	Gallus gallus finished cDNA, clone ChEST559d6. [BX934742]	A_87_P022446	TTCCAACGAGGACTTCACGACGCCCTTCGCAGAAGGAACTTGCTGCTTCTCTGTTGACCT	up	1.26727	0.27573	up	1.10446	0.755266
MAML1	Gallus gallus finished cDNA, clone ChEST691f7. [CR391039]	A_87_P013764	GATCTTAATCTTAACGAGCAAGAATGGAAGGAGCTTATTGAGGAGCTTAATAGGTCAGTG	up	1.26723	0.824071	down	1.07008	0.955108
BX933558	Gallus gallus finished cDNA, clone ChEST670d24. [BX933558]	A_87_P022969	ACAGGAATGGCATCATCAAGCTGAACATTTACTTCCAGGAGTACAACTACCGGACGATCT	up	1.26716	0.351701	up	1.11266	0.711376
AJ443888	AJ443888 dkfz426 Gallus gallus cDNA clone 38i22r1, mRNA sequence [AJ443888]	A_87_P037359	AGCACCCGCTGACCGCTGAGGGCACTTCCAGTACACGCAGCACTTTGGAAAAGCTTTGTT	up	1.26715	0.255659	up	1.13691	0.578716
AM068127	AM068127 Chicken immune 3 - CSEQRBN33 Gallus gallus cDNA clone C0000485F17_T7, mRNA sequence [AM068127]	A_87_P035364	GGAAGAGTGCTACAGTGAGATTAAGGAGCTGACTTCATTCCTAATGCAGCAAGATTCAGC	up	1.26687	0.142801	up	1.38031	0.114676
LOC422103	Gallus gallus finished cDNA, clone ChEST190e8. [BX929298]	A_87_P024778	TGGCTTTCAGTTATCGAGGTAGTTGTAGCTCTGTAATGGAGGTATAAGGTTTTAATACAT	up	1.26685	0.720628	down	1.14818	0.86563
BZRPL1	Gallus gallus finished cDNA, clone ChEST283m7. [CR353324]	A_87_P018012	GTGTAGCAGCCCAGGGCCTCCTTCTGTCCTGCTACCATTCCCTCAGAACAGAAACTGTTC	up	1.26685	0.447843	up	1.27564	0.491976
XYLT1	Gallus gallus xylosyltransferase I (XYLT1) mRNA, partial cds. [AY619009]	A_87_P035109	AGCATTGAGCCATGGAGAGAGCAGTGAGGGAACAGCTGCTAAAAGTGGTGTTTTTTAAGA	up	1.26682	0.659913	up	1.47003	0.512494
CR387386	Gallus gallus finished cDNA, clone ChEST281a9. [CR387386]	A_87_P015852	TTCCCGGCATTTCAAATACACATTTTATCTGTTAGGAATTCTTGTGCTGTTCAGCATAAC	up	1.26665	0.429888	up	1.2781	0.367815
CR385566	Gallus gallus finished cDNA, clone ChEST610d14. [CR385566]	A_87_P017067	AGGGGTCAAAACACACACACACAGTGCATACTTCCCAGGCTGTCATTATTGCCAAACTTT	up	1.26646	0.0231237	up	1.21619	0.118731
CNIH2	Gallus gallus CNIL mRNA for cornichon-like protein, complete cds. [AB232677]	A_87_P038036	GTGGGGCTCTGCCGGCTGCGCCATCCCTATGCGGCTCAATAAAGACCAGTGGCACCAAAA	up	1.2664	0.185965	up	1.16549	0.36177
DPM1	Gallus gallus finished cDNA, clone ChEST124a24. [CR524367]	A_87_P010948	GGAGAATCTAAACTGGGAGGCAATGAAATAGTCTCCTTCTTAAAGGGACTCTTGACATTG	up	1.26639	0.146069	up	1.21643	0.219126
CR523957	Gallus gallus finished cDNA, clone ChEST692p23. [CR523957]	A_87_P011254	CTCTCTGCTGTTACATCAAAATGGTCTATGTGAACATCAGAAGATGTGCTCAGCATCCTA	up	1.26636	0.156087	up	1.303	0.217919
GEMIN6	Gallus gallus finished cDNA, clone ChEST189c23. [BX929290]	A_87_P024783	TAAGAAAGGACTACAGCAAGCGGTGCAAACAAAAAGCACCGTCGTGTTTAGTTCAAACAA	up	1.26611	0.2223	up	1.04785	0.530284
LOC396009	Chicken mRNA for slow muscle troponin T, complete sequence. [D85105]	A_87_P009768	TGCACGACTGGATCCAGCAGCTGGAGTCGGAGAAGTTCGACCTGATGGAGAAGCTGCGGC	up	1.26591	0.134341	up	1.27925	0.023435
CR406781	Gallus gallus finished cDNA, clone ChEST872a17. [CR406781]	A_87_P012537	GTACTGCTGTGGAGGAGCAGAGGAGCTGCAGCACCAAAGTCAACATGATTTCACAGACAG	up	1.26579	0.287106	up	1.2257	0.456602
MOXD1	Gallus gallus DBHR protein (DBHR) mRNA, complete cds. [AF327450]	A_87_P037686	ACTATGTCCTGGCTCTTCACATCATGTTTTCAAAACCAACTATGTATATGGGTGAAATTA	up	1.26579	0.069498	up	1.22051	0.193313
CV861387	gonad_EST08863 Embryonic gonad cDNA Library Gallus gallus cDNA 5', mRNA sequence [CV861387]	A_87_P010091	GATGCCATTGTGCAAGCTGTTAAAGTGGCAGTGTCCAAATCATGAAATGCAGAGTAGTTT	up	1.26554	0.17686	up	1.32897	0.16876
ARL3	Gallus gallus finished cDNA, clone ChEST964n11. [BX930620]	A_87_P024229	TGAGCTTTTGGATGAAGAAAAGCTTGGTGGAGTCCCTGTGCTCATATTCGCTAACAAGCA	up	1.26552	0.0585486	up	1.10036	0.265446
TIMP2	Gallus gallus tissue inhibitor of metalloproteinase-2 precursor (TIMP-2) mRNA, complete cds. [AF004664]	A_87_P038026	TGATTGCAGGCAAATCCGAGGGCGATGGCAAGATGCACATCACGCTGTGTGACCTGGTTG	up	1.26525	0.197265	up	1.02723	0.801434
FAIM2	Gallus gallus finished cDNA, clone ChEST752e3. [CR390945]	A_87_P013832	TCAGCATCTTTACCCTCTCCATGGCTTATCTCACGGGGATGCTTTCCAGTTATTATGACA	up	1.26521	0.674413	up	1.36822	0.615089
SMARCA5	Gallus gallus mRNA for hypothetical protein, clone 6n5. [AJ719817]	A_87_P036837	TGAAATGGGTCTGGGGAAGAAACTGCAGACAATCTCTCTCCTTGGATATTTGAAACACTA	up	1.26519	0.183748	up	1.41071	0.164189
CHRNG	Gallus gallus cholinergic receptor, nicotinic, gamma polypeptide (CHRNG), mRNA [NM_001031568]	A_87_P009217	AGAGTGATCGACCGCGTCTGCTTCTTCATCATGGCCTCGCTCTTCGTGTGCGGTACCATT	up	1.2651	0.561453	up	1.30084	0.568676
ICOSLG	Gallus gallus mRNA for ICOS ligand (LICOS gene). [Y08823]	A_87_P008753	AAGTGGTTCTAAGCCTAGCAGCTAGTTACAGCCAACCAATACTCAGTGGGCCAATAAGAT	up	1.26499	0.145716	up	1.10693	0.457708
GPHN	Gallus gallus gephyrin (GPHN), mRNA [NM_001031549]	A_87_P009221	GTTATCATGTGATGTAAAATTGGACCCCCGCCCAGAATATCATCGGTGCATACTGACTTG	up	1.26427	0.0406515	up	1.14623	0.232469
LOC419851	Gallus gallus finished cDNA, clone ChEST730l23. [BX934794]	A_87_P022412	ACCACCACAATGCCAGCGCAGCAGCTGTGATGACCCTCCTGACGTGCAGAATGCTGTTAA	up	1.26422	0.478202	up	1.20513	0.603438
RCJMB04_8j10	Gallus gallus mRNA for hypothetical protein, clone 8j10. [AJ719937]	A_87_P036755	CTCACACCTCTTTTTGCCTCTTGTTTTATACACTGTTAAATGCATGCATGCCCAGGTGTG	up	1.26407	0.00477271	up	1.20892	0.0428699
[truncated: 7,067 more rows]
